# Supplementary material for: A method for the efficient evaluation of substrate-based cholinesterase imaging probes for Alzheimer’s disease
Source: PubMed Central journal article supplement (PMC10294744; doi:10.1080/14756366.2023.2225797), 2023-06-26
Supplement: IENZ_A_2225797_SM6062.pdf [file IENZ_A_2225797_SM6062.pdf]

Supplementary Material

**A method for the efficient evaluation of substrate-based cholinesterase imaging probes for Alzheimer's disease**

Sultan Darvesh<sup>1,2,3</sup>, Scott Banfield<sup>1</sup>, Maeve Dufour<sup>1</sup>, Katrina L. Forrestall<sup>1</sup>, Hillary Maillet<sup>1</sup>, G. Andrew Reid<sup>1</sup>, Dane Sands<sup>1</sup>, Ian R. Pottie<sup>3,4</sup>

<sup>1</sup>Department of Medical Neuroscience, Dalhousie University, Halifax, Nova Scotia, Canada

<sup>2</sup>Department of Medicine (Geriatric Medicine & Neurology), Halifax, Nova Scotia, Canada

<sup>3</sup>Department of Chemistry and Physics, Mount St. Vincent University, Halifax, Nova Scotia, Canada

<sup>4</sup>Department of Chemistry, Saint Mary's University, Halifax, Nova Scotia, Canada

**Corresponding Author:**

Sultan Darvesh

Room 1308

Camp Hill Veterans' Memorial Building

5955 Veterans' Memorial Lane

Halifax, Nova Scotia, Canada B3H 2E1

Telephone: (902) 473-2490

Fax: (902) 473-7133

Email: sultan.darvesh@dal.ca

## Table of Contents:

### **A. Synthetic Procedures and Spectroscopic Data:**

#### *Aryl Thiocholine Derivatives*

(5) 2-[(*p*-Fluorobenzoyl)thio]-1-(trimethylammonio)ethane Iodide

(6) 2-[(*p*-Iodobenzoyl)thio]-1-(trimethylammonio)ethane Iodide

#### *Alkyl N-Methylpiperidinyl Derivatives*

(7) *S*-(1-Methylpiperid-4-yl) Ethanethioate Hydrochloride

(8) 4-Acetoxy-1-methyl-1-piperidinium Chloride

(9) *S*-(1-Methylpiperid-4-yl) Butanethioate Hydrochloride

(10) 4-Butyroxyl-1-methyl-1-piperidinium Chloride

#### *Aryl N-Methylpiperidinyl Derivatives*

(11) (1-Methylpiperidin-4-yl) *p*-Iodobenzenecarbothioate Hydrochloride

(12) 4-(*p*-Iodobenzoyloxy)-1-methyl-1-piperidinium Chloride

(13) *S*-(1-Methylpiperidin-4-yl) *p*-Fluorobenzenecarbothioate Hydrochloride

(14) 4-(*p*-Fluorobenzoyloxy)-1-methyl-1-piperidinium Chloride

#### *Alkyl N-Methylpyrrolidinyl Derivatives*

(15) (3*S*)-*S*-(1-Methylpyrrolidin-3-yl) Ethanethioate

(16) (3*S*)-3-Acetoxy-1-methyl-1-pyrrolidinium Chloride

- (17) (3*R*)-*S*-(1-Methylpyrrolidin-3-yl) Ethanethioate  
(18) (3*R*)-3-Acetoxy-1-methyl-1-pyrrolidinium Chloride  
(19) ((3*S*)-1-Methylpyrrolidin-3-yl) Butanethioate  
(20) (3*S*)-3-Butyroxyl-1-methyl-1-pyrrolidinium Chloride  
(21) ((3*R*)-1-Methylpyrrolidin-3-yl) Butanethioate  
(22) (3*R*)-3-Butyroxyl-1-methyl-1-pyrrolidinium Chloride

*Aryl N-Methylpyrrolidinyl Derivatives*

- (23) ((3*S*)-1-Methylpyrrolidin-3-yl) *p*-Iodobenzenecarbothioate Oxylate  
(24) (3*S*)-3-(*p*-Iodobenzoyloxy)-1-methyl-1-pyrrolidinium Chloride  
(25) ((3*S*)-1-Methylpyrrolidin-3-yl) *p*-Fluorobenzenecarbothioate Oxylate  
(26) (3*S*)-3-(*p*-Fluorobenzoyloxy)-1-methyl-1-pyrrolidinium Chloride  
(27) ((3*R*)-1-Methylpyrrolidin-3-yl) *p*-Iodobenzenecarbothioate Oxylate  
(28) (3*R*)-3-(*p*-Iodobenzoyloxy)-1-methyl-1-pyrrolidinium Chloride  
(29) ((3*R*)-1-Methylpyrrolidin-3-yl) *p*-Fluorobenzenecarbothioate Oxylate  
(30) (3*R*)-3-(*p*-Fluorobenzoyloxy)-1-methyl-1-pyrrolidinium Chloride

**References**

**B. Figures for histochemistry**

**Figure S1. Human brain tissues.**

**Figure S2. Mouse brain tissues**

## A. Synthetic Procedures and Spectroscopic Data:

### *Aryl Thiocholine Derivatives*

(5) 2-[(*p*-Fluorobenzoyl)thio]-1-(trimethylammonio)ethane Iodide:

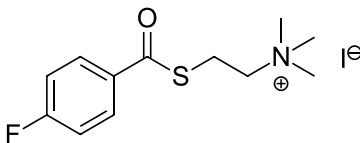

#### *Synthesis:*

**2-[(*p*-Fluorobenzoyl)thio]-1-(trimethylammonio)ethane Iodide:** 2-(Dimethylamino)

ethanethiol hydrochloride (1.23 g, 8.66 mmol) was suspended in anhydrous dichloromethane (17 mL) and cooled in an ice bath. Triethylamine (3.0 mL, 21.7 mmol) was added dropwise; followed by 4-dimethylaminopyridine (0.106 g, 0.866 mmol) and 4-fluorobenzoyl chloride (1.2 mL, 10.4 mmol). The mixture was warmed to room temperature and stirred for 16 hrs where a white precipitate formed. After this stirring time, the reaction was gravity filtered to remove the precipitate, and the filter cake was washed with dichloromethane (2 × 10 mL). The filtrate was washed with 0.04 N HCl<sub>(aq)</sub> (50 mL), saturated NaHCO<sub>3(aq)</sub> (50 mL), and H<sub>2</sub>O (50 mL). The organic layer was dried over Na<sub>2</sub>SO<sub>4</sub>, gravity filtered, and the filtrate was concentrated *in vacuo* to afford 1.58 g of an off-white solid. This material (1.51 g, 6.65 mmol) was used immediately without purification. It was dissolved in anhydrous THF (10 mL) and the reaction was cooled to 0°C using an ice bath. Iodomethane (0.50 mL, 7.98 mmol) was added dropwise to the above solution resulting in the formation of a white precipitate. The mixture was warmed to room temperature and stirred for 2 hrs at this temperature. The precipitate was then collected via suction filtration, and the filter cake was washed with Et<sub>2</sub>O (100 mL). The filter cake was

transferred to a round bottom flask and placed under a vacuum (1mm Hg) for 5 hrs to afford 2-[(*p*-fluorobenzoyl)thio]-1-(trimethylammonio)ethane iodide (1.92 g, 60% yield) as a white solid.

*Spectroscopic data:*

MP<sub>(THF)</sub>: 197–199°C; IR(ATR) 3105, 3087, 3011, 2969, 2932, 1662, 1595, 1205, 906 cm<sup>-1</sup>; <sup>1</sup>H NMR (400 MHz, DMSO-*d*<sub>6</sub>) δ 8.06-8.02 (m, 2H), 7.46-7.42 (m, 2H), 3.55-3.45 (m, 4H), 3.17 (s, 9H); <sup>13</sup>C NMR (100.7 MHz, DMSO-*d*<sub>6</sub>) δ 188.8 (0), 165.6 (d, <sup>1</sup>J<sub>C,F</sub> = 253.5 Hz, 0), 132.3 (d, <sup>4</sup>J<sub>C,F</sub> = 2.8 Hz, 0), 130.1 (d, <sup>3</sup>J<sub>C,F</sub> = 9.7 Hz, 1), 116.5 (d, <sup>2</sup>J<sub>C,F</sub> = 22.3 Hz, 1), 63.7 (2), 52.3 (3), 21.6 (2); LRMS (ESI<sup>+</sup>): 242.1 (M<sup>+</sup>); <sup>19</sup>F NMR (376.6 MHz, DMSO-*d*<sub>6</sub>) δ -103.8; HRMS (ESI<sup>+</sup>): calculated for C<sub>12</sub>H<sub>17</sub>FNOS<sup>+</sup>: 242.1009 amu; found for C<sub>12</sub>H<sub>17</sub>FNOS<sup>+</sup>: 242.1011 amu; HPLC purity at 230 nm (25% CH<sub>3</sub>CN : 75% CH<sub>3</sub>OH, retention time: 1.837 mins): 99%.

(5) 2-[(*p*-Fluorobenzoyl)thio]-1-(trimethylammonio)ethane Iodide IR(ATR)

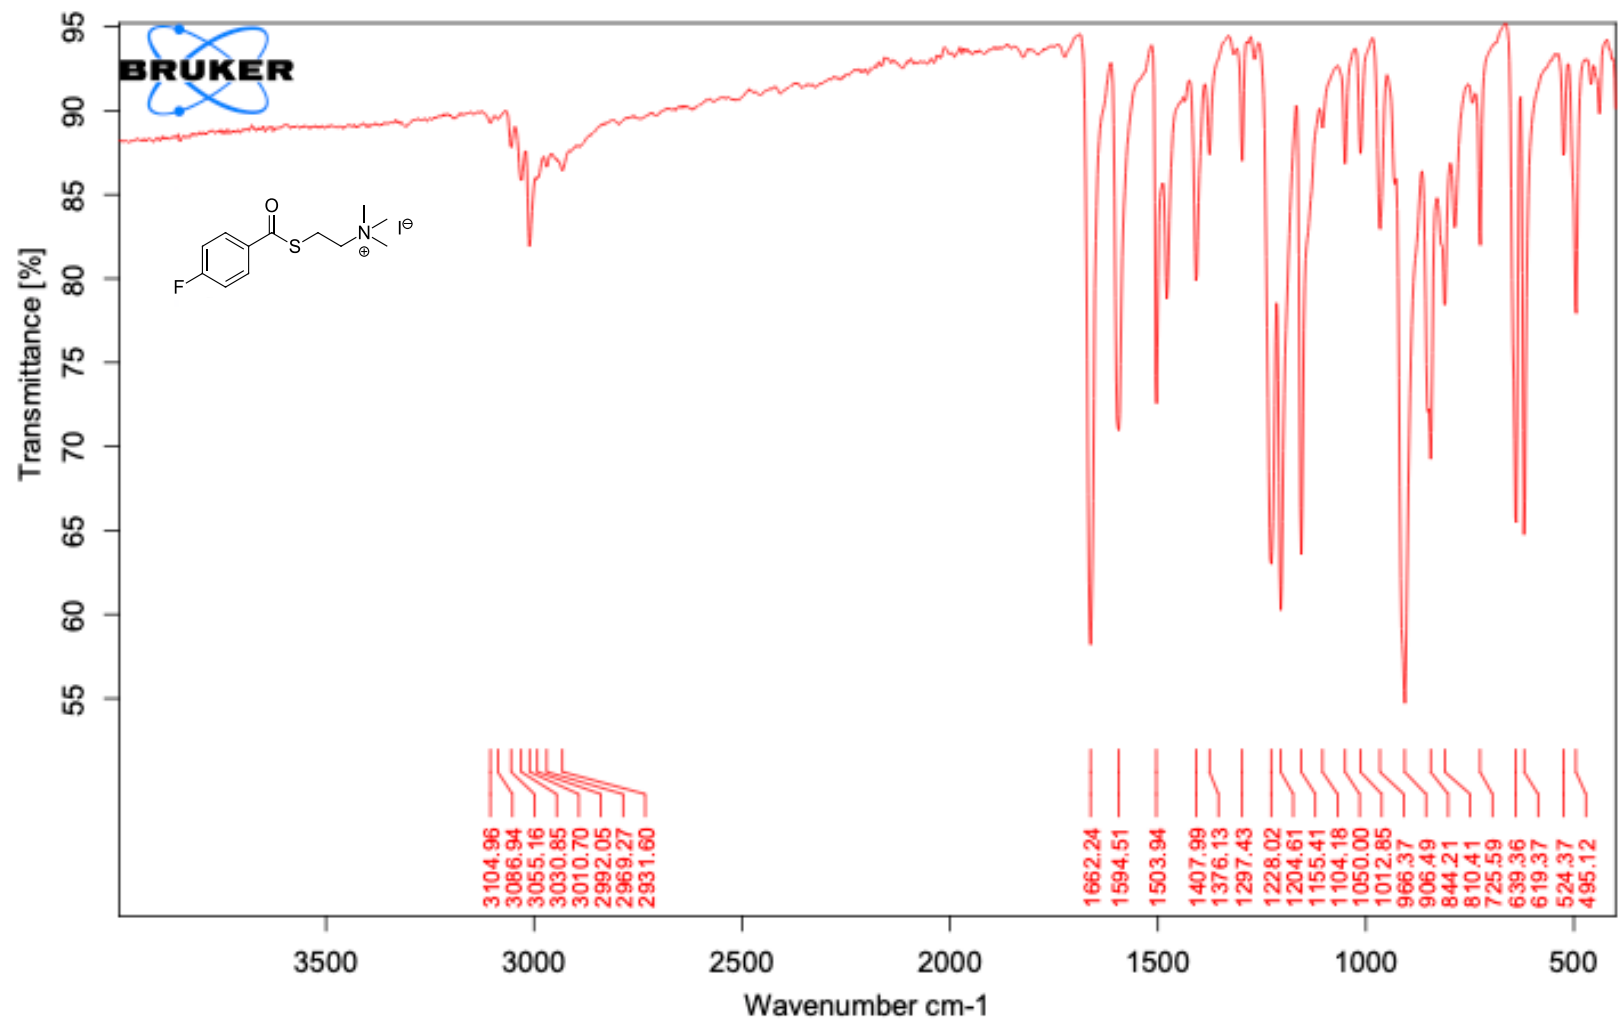

(5) 2-[(*p*-Fluorobenzoyl)thio]-1-(trimethylammonio)ethane Iodide <sup>1</sup>H NMR 400 MHz (DMSO-*d*<sub>6</sub>)

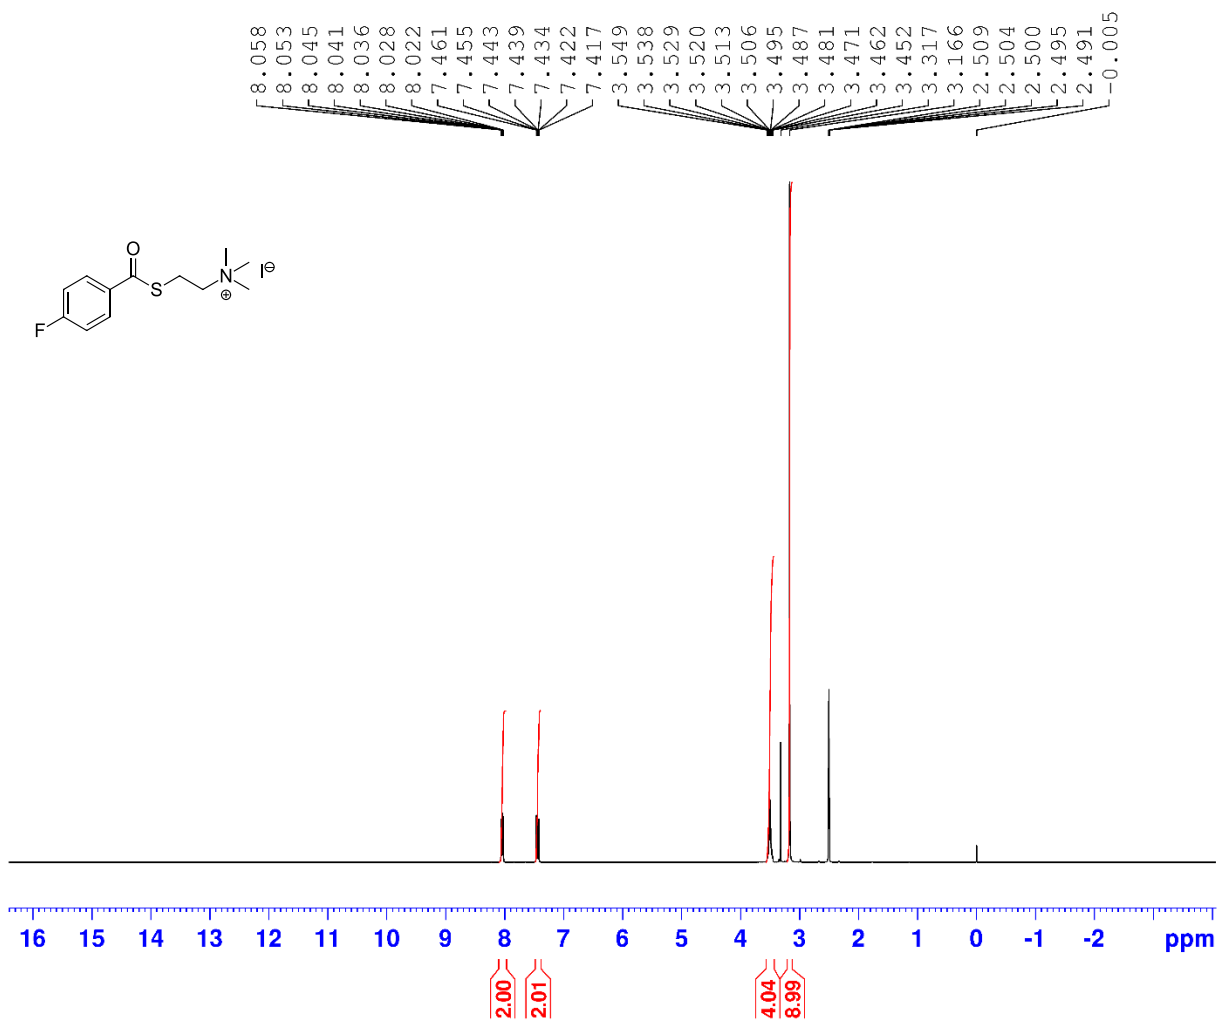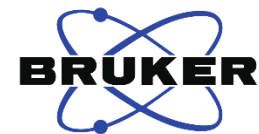

Current Data Parameters  
 NAME SB-1-141  
 EXPNO 7  
 PROCNO 1

F2 - Acquisition Parameters  
 Date\_ 20221103  
 Time 13.45 h  
 INSTRUM AVN 400  
 PROBHD Z163739\_0038 (  
 PULPROG zg30  
 TD 65536  
 SOLVENT DMSO  
 NS 16  
 DS 2  
 SWH 8196.722 Hz  
 FIDRES 0.250144 Hz  
 AQ 3.9976959 sec  
 RG 101  
 DW 61.000 usec  
 DE 13.55 usec  
 TE 298.0 K  
 D1 1.00000000 sec  
 TD0 1  
 SF01 400.3024719 MHz  
 NUC1 1H  
 P0 3.33 usec  
 P1 9.98 usec  
 PLW1 14.13000011 W

F2 - Processing parameters  
 SI 65536  
 SF 400.3000028 MHz  
 WDW EM  
 SSB 0  
 LB 0.30 Hz  
 GB 0  
 PC 1.00

(5) 2-[(*p*-Fluorobenzoyl)thio]-1-(trimethylammonio)ethane Iodide  $^{13}\text{C}$  NMR 100 MHz (DMSO-*d*<sub>6</sub>)

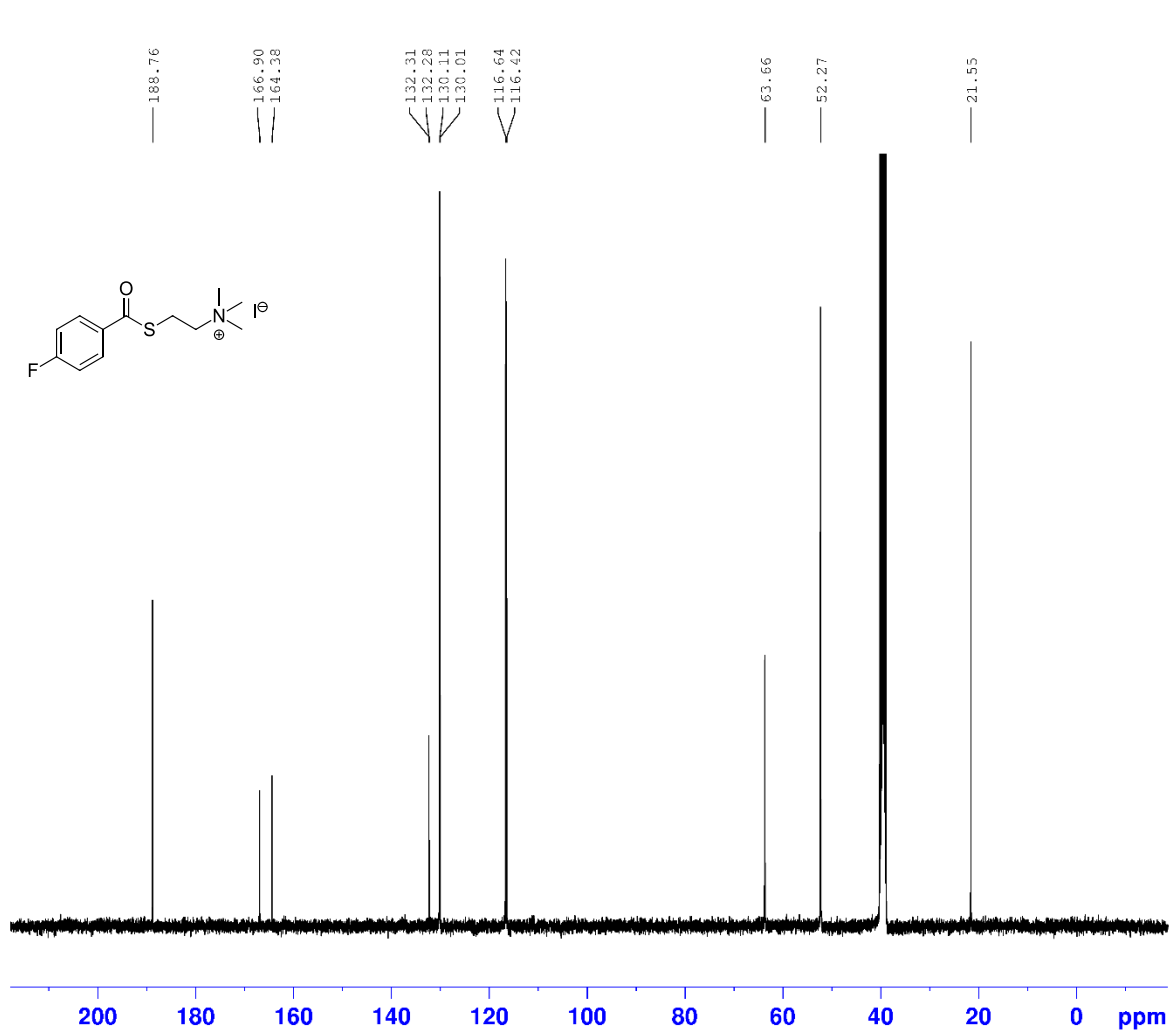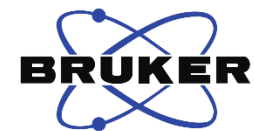

Current Data Parameters  
NAME SB-i-141  
EXPNO 5  
PROCNO 1

F2 - Acquisition Parameters  
Date\_ 20220923  
Time 5.48 h  
INSTRUM AVN 400  
PROBHD Z163739\_0038 (   
PULPROG zgpg30  
TD 65536  
SOLVENT DMSO  
NS 3072  
DS 4  
SWH 23809.523 Hz  
FIDRES 0.726609 Hz  
AQ 1.3762560 sec  
RG 31.0717  
DW 21.000 usec  
DE 6.50 usec  
TE 295.3 K  
D1 3.0000000 sec  
D11 0.0300000 sec  
TD0 1  
SF01 100.6655806 MHz  
NUC1 13C  
P0 3.33 usec  
P1 10.00 usec  
PLW1 58.86999893 W  
SF02 400.3016012 MHz  
NUC2 1H  
CPDPRG2 waltz65  
PCPD2 90.00 usec  
PLW2 14.13000011 W  
PLW12 0.17375000 W  
PLW13 0.08739400 W

F2 - Processing parameters  
SI 32768  
SF 100.6555608 MHz  
WDW EM  
SSB 0  
LB 1.00 Hz  
GB 0  
PC 1.40



(5) 2-[(*p*-Fluorobenzoyl)thio]-1-(trimethylammonio)ethane Iodide High Resolution Mass Spectroscopy (ESI, positive mode)

### Mass Spectrum SmartFormula Report

**Analysis Info**

Analysis Name D:\Data\Xiao\Oct 14 2022\000003.d  
Method Xiao all 1.m  
Sample Name TRV 6021  
Comment

Acquisition Date 2022-10-14 10:43:25 AM

Operator x  
Instrument compact 8255754.20059

**Acquisition Parameter**

|             |            |                      |          |                  |           |
|-------------|------------|----------------------|----------|------------------|-----------|
| Source Type | ESI        | Ion Polarity         | Positive | Set Nebulizer    | 0.5 Bar   |
| Focus       | Not active | Set Capillary        | 3500 V   | Set Dry Heater   | 181 °C    |
| Scan Begin  | 50 m/z     | Set End Plate Offset | -500 V   | Set Dry Gas      | 4.0 l/min |
| Scan End    | 1500 m/z   | Set Charging Voltage | 2000 V   | Set Divert Valve | Source    |
|             |            | Set Corona           | 0 nA     | Set APCI Heater  | 0 °C      |

| Meas. m/z | Ion Formula                          | m/z      | err [ppm] |
|-----------|--------------------------------------|----------|-----------|
| 242.1011  | C <sub>12</sub> H <sub>17</sub> FNOS | 242.1009 | -0.6      |

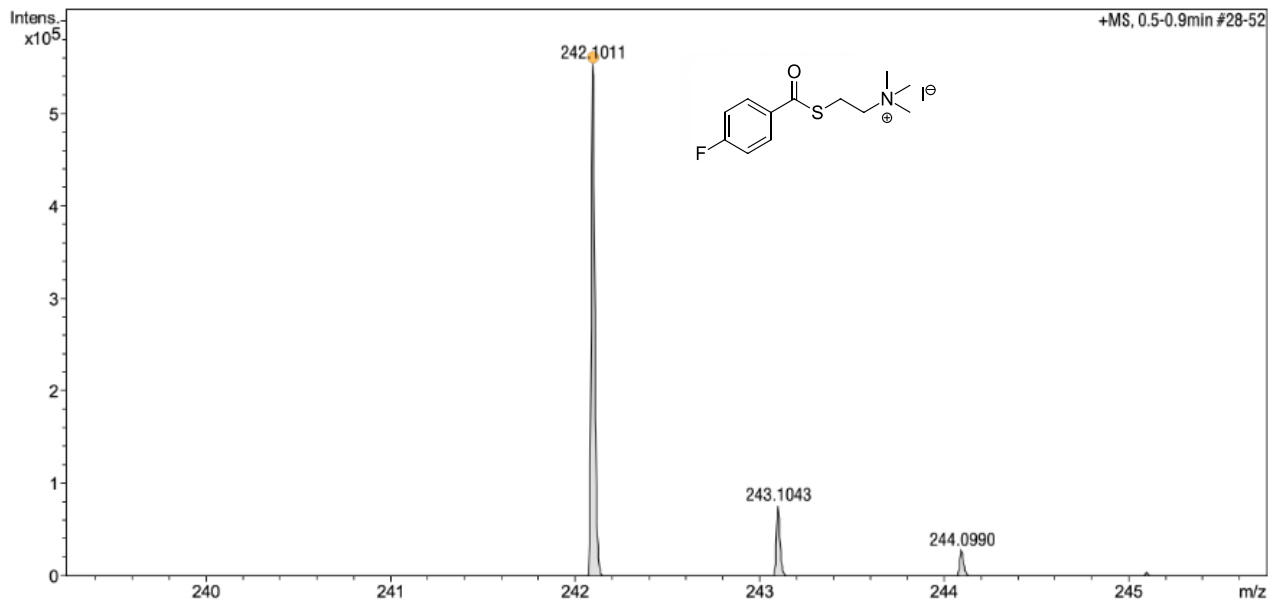

Oct 14 2022\000003.d

Bruker Compass DataAnalysis 4.3

printed: 2022-10-14 10:47:21 AM

by: x

Page 1 of 1

(5) 2-[(*p*-Fluorobenzoyl)thio]-1-(trimethylammonio)ethane Iodide HPLC Trace

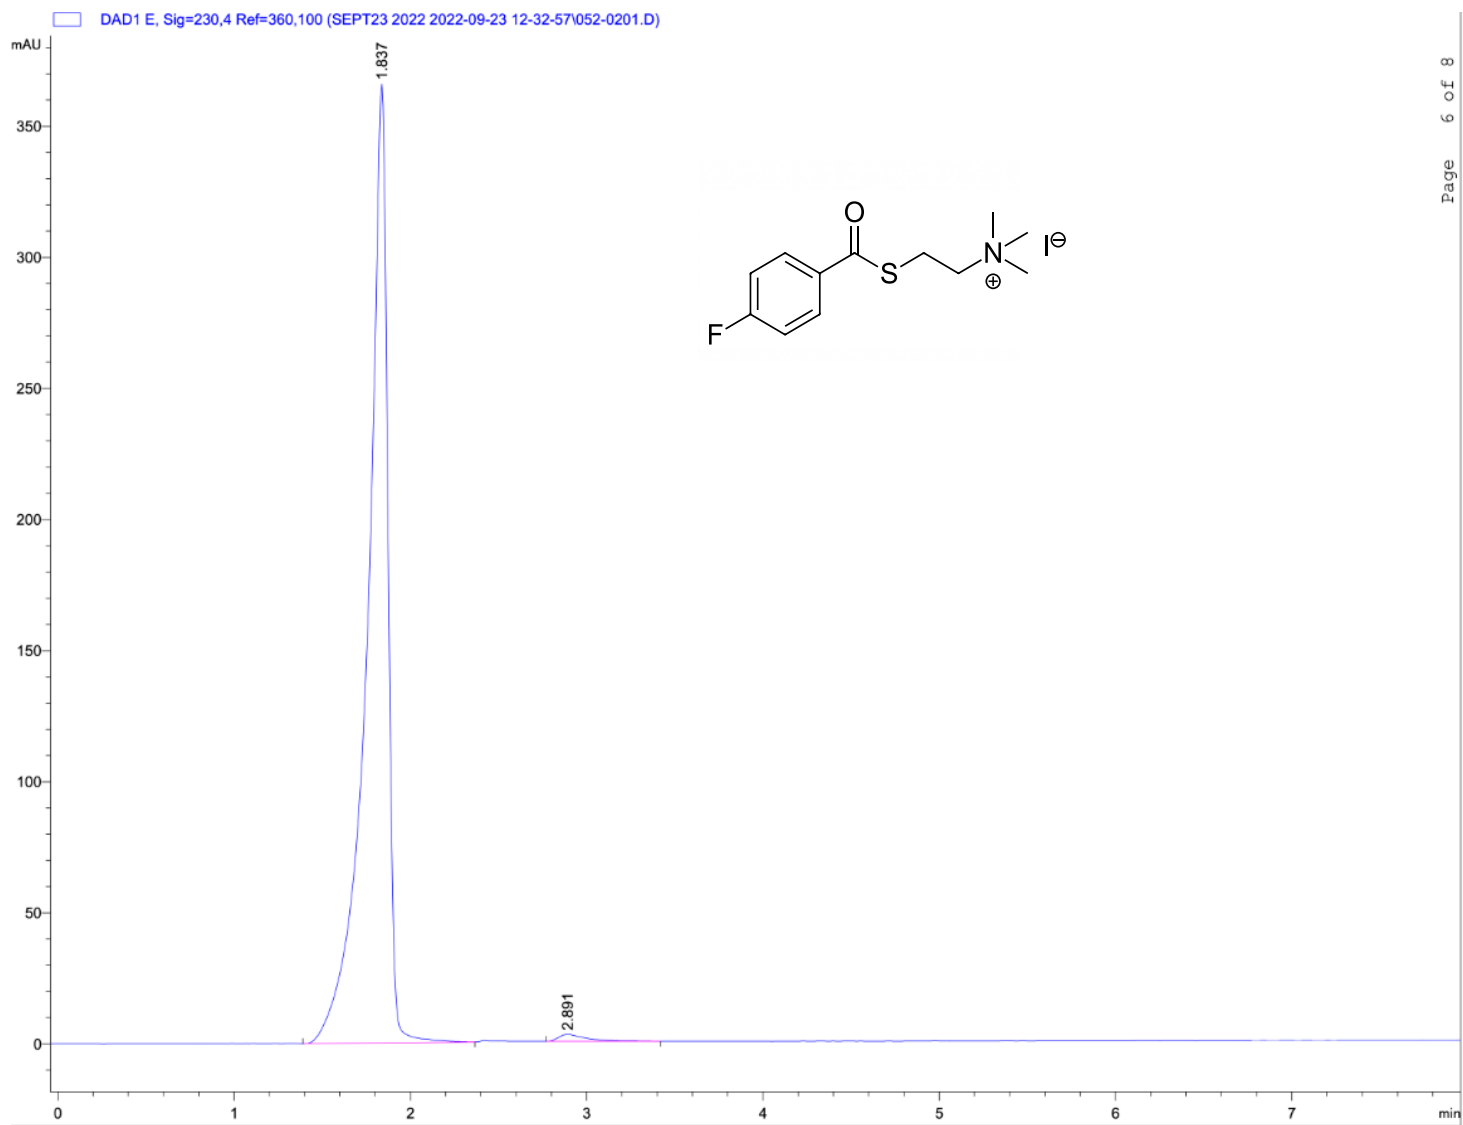

(6) 2-[(*p*-Iodobenzoyl)thio]-1-(trimethylammonio)ethane Iodide:

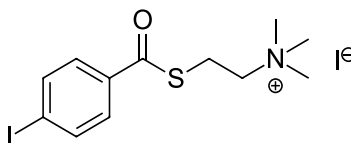

*Synthesis:*

**2-[(*p*-Iodobenzoyl)thio]-1-(trimethylammonio)ethane Iodide:** 2-(Dimethylamino)ethanethiol hydrochloride (1.16 g, 8.20 mmol) was suspended in anhydrous dichloromethane (16 mL) and cooled in an ice bath. Triethylamine (2.9 mL, 20.8 mmol) was added dropwise; followed by 4-dimethylaminopyridine (0.100 g, 0.82 mmol) and 4-iodobenzoyl chloride (2.62 mL, 9.84 mmol). The mixture was warmed to room temperature and stirred for 16 hrs where a white precipitate formed. After this, the reaction was gravity filtrated to remove the precipitate, and the filter cake was washed with dichloromethane (2 × 10 mL). The filtrate was washed with 0.04 N HCl<sub>(aq)</sub> (50 mL), saturated NaHCO<sub>3(aq)</sub> (50 mL), and H<sub>2</sub>O (50 mL). The organic layer was dried over Na<sub>2</sub>SO<sub>4</sub>, gravity filtered, and the filtrate was concentrated *in vacuo* to afford 2.33 g of an off-white solid. This material (2.33 g, 6.95 mmol) was used immediately without purification. It was dissolved in anhydrous THF (10 mL) and cooled in an ice bath. Iodomethane (0.52 mL, 8.34 mmol) was added dropwise to the above solution resulting in the formation of a white precipitate. The mixture was warmed to room temperature and stirred for 2 hrs at this temperature. The precipitate was then collected *via* suction filtration, and the filter cake was washed with Et<sub>2</sub>O (100 mL). The filter cake was transferred to a round bottom flask and placed under a vacuum (1 mm Hg) for 5 hrs to afford 2-[(*p*-iodobenzoyl)thio]-1-(trimethylammonio)ethane iodide (3.21 g, 82% yield) as a white solid.

*Spectroscopic data:*

MP<sub>(THF)</sub>: >250°C; IR(ATR) 3041, 3006, 2942, 1680, 1650, 1576, 1207, 913, 835, 820 cm<sup>-1</sup>; <sup>1</sup>H NMR (400 MHz, DMSO-*d*<sub>6</sub>) δ 8.00-7.98 (m, 2H), 7.71-7.69 (m, 2H), 3.54-3.45 (m, 4H), 3.17 (s, 9H); <sup>13</sup>C NMR (100.7 MHz, DMSO-*d*<sub>6</sub>) δ 189.7 (0), 138.3 (1), 134.9 (0), 128.5 (1), 103.5 (0), 63.6 (2), 52.3 (3), 21.5 (2); LRMS (ESI<sup>+</sup>): 350.0 (M<sup>+</sup>); HRMS (ESI<sup>+</sup>): calculated for C<sub>12</sub>H<sub>17</sub>INOS<sup>+</sup>: 350.0070 amu; found for C<sub>12</sub>H<sub>17</sub>INOS<sup>+</sup>: 350.0068 amu; HPLC purity at 230 nm (25% CH<sub>3</sub>CN : 75% CH<sub>3</sub>OH, retention time: 1.790 mins): 98%.

(6) 2-[(*p*-Iodobenzoyl)thio]-1-(trimethylammonio)ethane Iodide IR(ATR)

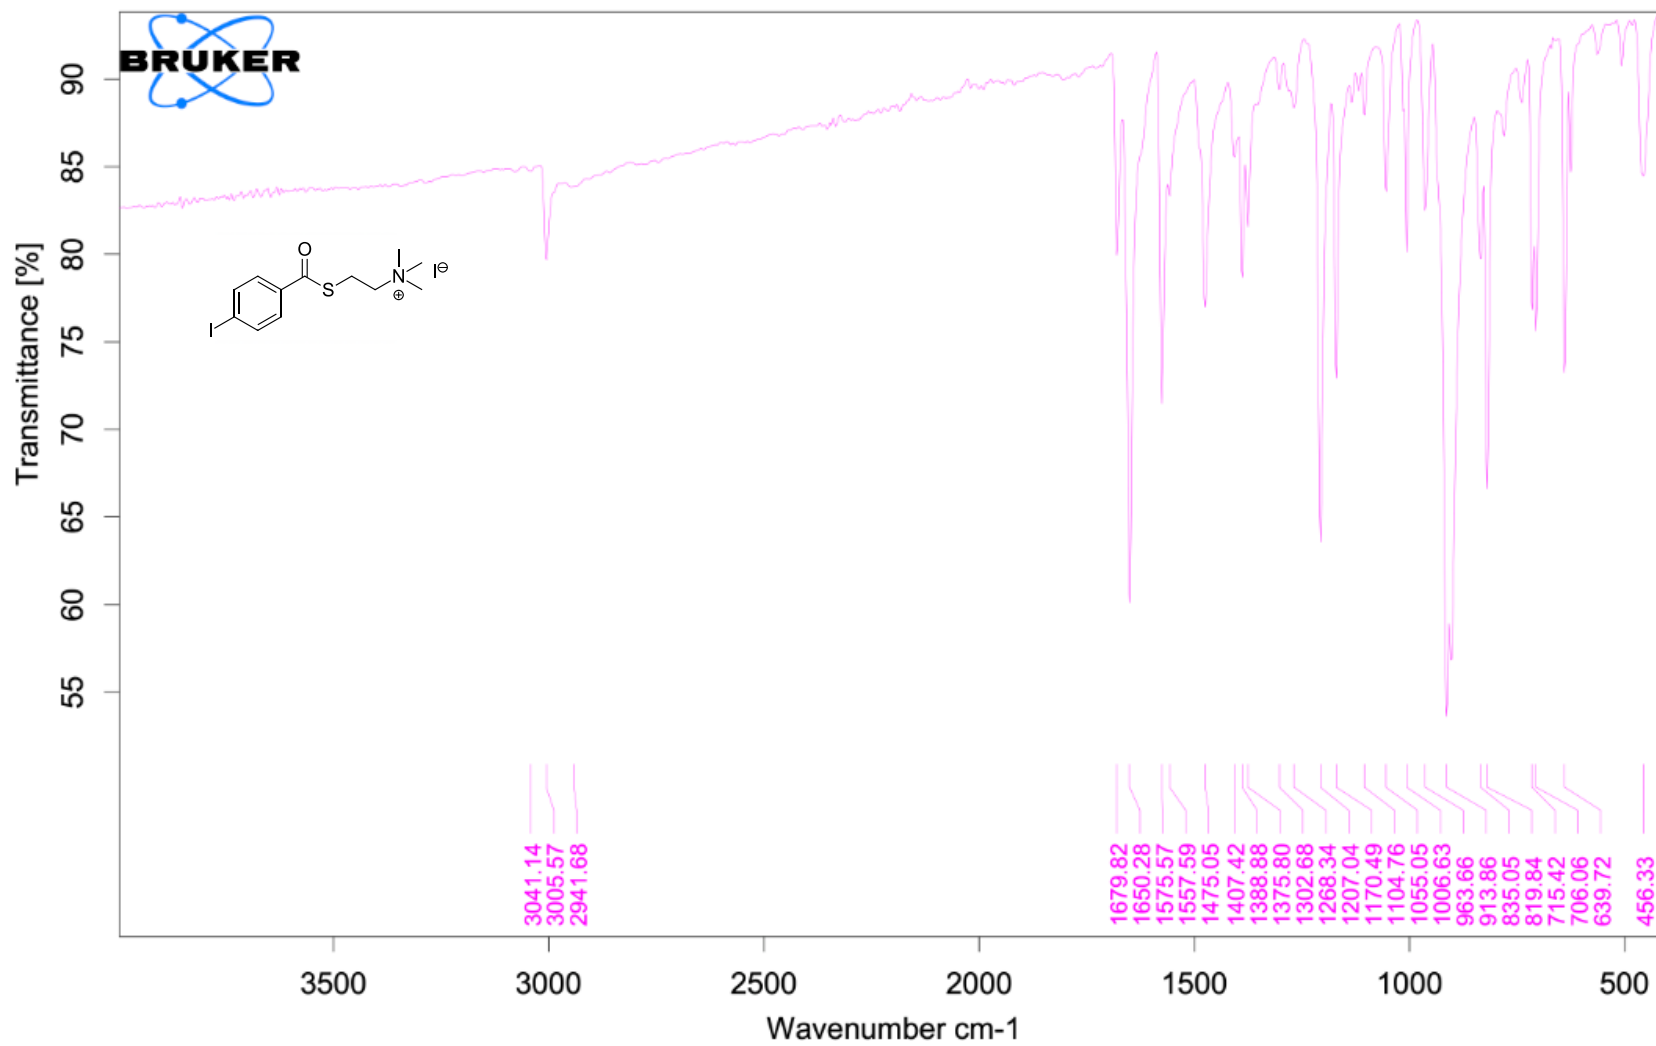

(6) 2-[(*p*-Iodobenzoyl)thio]-1-(trimethylammonio)ethane Iodide <sup>1</sup>H NMR 400 MHz (DMSO-*d*<sub>6</sub>)

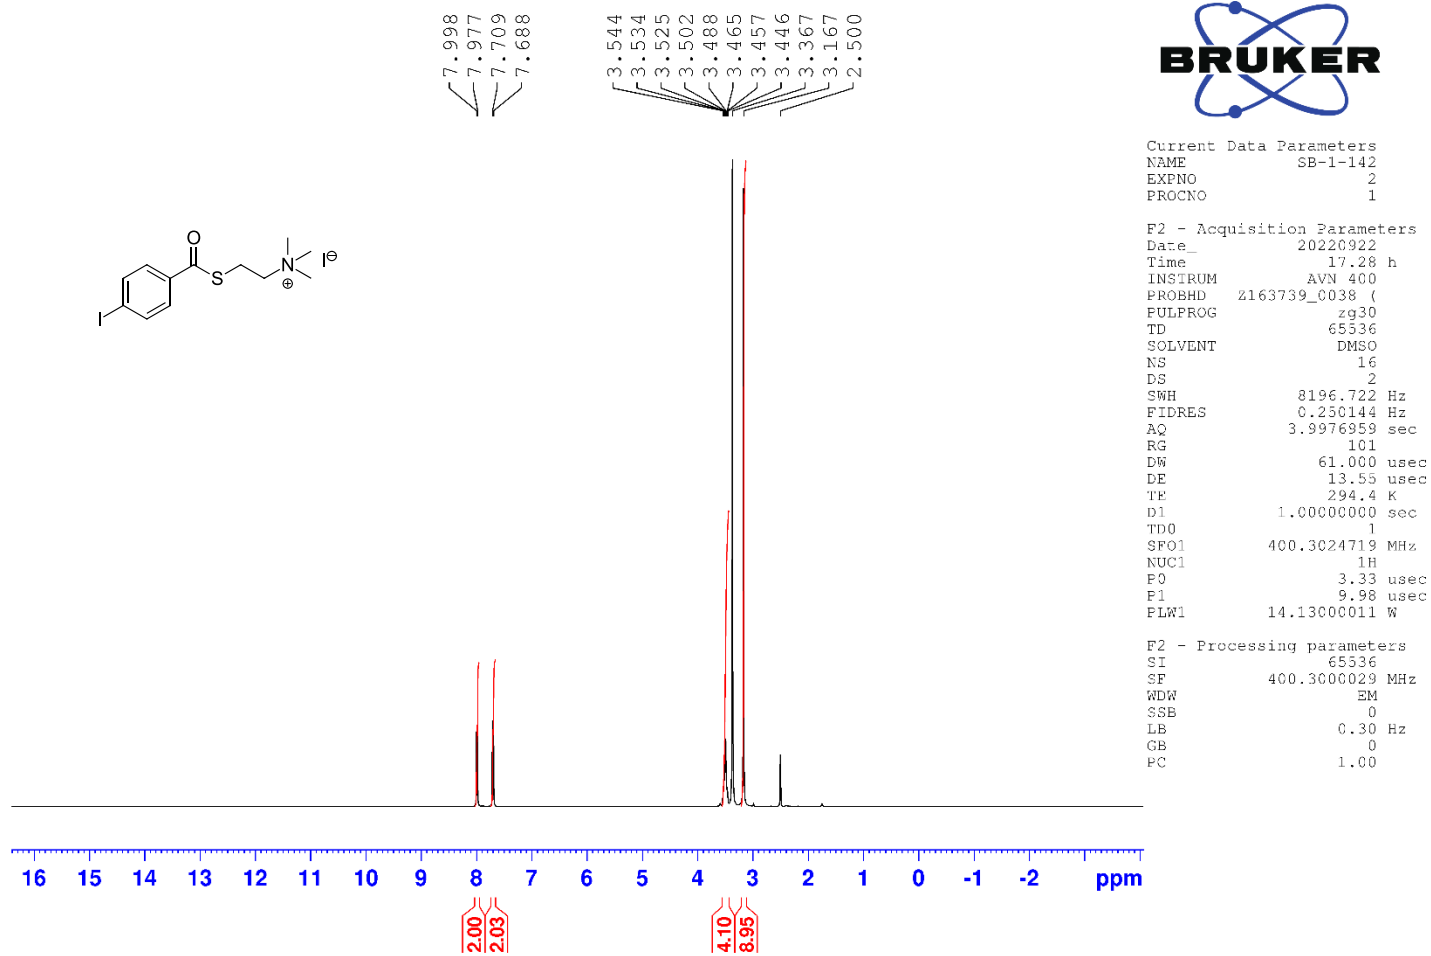

(6) 2-[(*p*-Iodobenzoyl)thio]-1-(trimethylammonio)ethane Iodide  $^{13}\text{C}$  NMR 100 MHz (DMSO-*d*<sub>6</sub>)

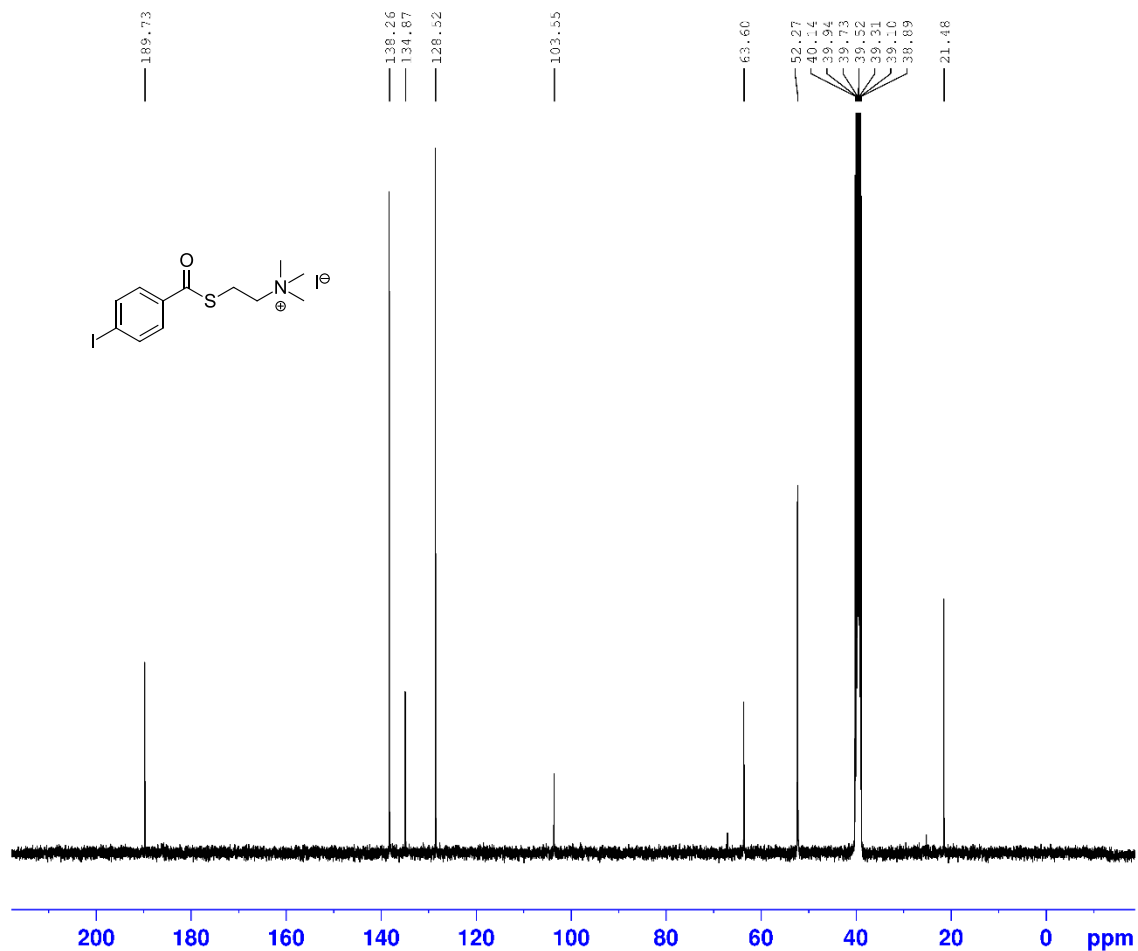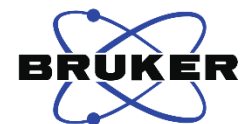

```

Current Data Parameters
NAME          SB-1-142
EXPNO         3
PROCNO        1

F2 - Acquisition Parameters
Date_         20220922
Time          21.52 h
INSTRUM       AVN 400
PROBHD        Z163739_0038 (
PULPROG       zgpg30
TD            65536
SOLVENT       DMSO
NS            3072
DS            4
SWH           23809.523 Hz
FIDRES        0.726609 Hz
AQ            1.3762560 sec
RG            28.5524
DW            21.000 usec
DE            6.50 usec
TE            295.3 K
D1            3.0000000 sec
D11           0.0300000 sec
TD0           1
SFO1          100.6655806 MHz
NUC1          13C
P0            3.33 usec
P1            10.00 usec
PLW1          58.86999893 W
SFO2          400.3016012 MHz
NUC2          1H
CPDPRG[2]    waltz65
PCPD2         90.00 usec
PLW2          14.13000011 W
PLW12         0.17375000 W
PLW13         0.08739400 W

F2 - Processing parameters
SI            32768
SF            100.6555602 MHz
WDW           EM
SSB           0
LB            1.00 Hz
GB            0
PC            1.40
    
```

(6) 2-[(p-Iodobenzoyl)thio]-1-(trimethylammonio)ethane Iodide High Resolution Mass Spectrum (ESI, positive mode)

### Mass Spectrum SmartFormula Report

**Analysis Info**

Analysis Name D:\Data\Xiao\Oct 14 2022\000004.d  
Method Xiao all 1.m  
Sample Name TRV 6022  
Comment

Acquisition Date 2022-10-14 10:53:58 AM  
Operator x  
Instrument compact 8255754.20059

**Acquisition Parameter**

|             |            |                      |          |                  |           |
|-------------|------------|----------------------|----------|------------------|-----------|
| Source Type | ESI        | Ion Polarity         | Positive | Set Nebulizer    | 0.5 Bar   |
| Focus       | Not active | Set Capillary        | 3500 V   | Set Dry Heater   | 181 °C    |
| Scan Begin  | 50 m/z     | Set End Plate Offset | -500 V   | Set Dry Gas      | 4.0 l/min |
| Scan End    | 1500 m/z   | Set Charging Voltage | 2000 V   | Set Divert Valve | Source    |
|             |            | Set Corona           | 0 nA     | Set APCI Heater  | 0 °C      |

| Meas. m/z | Ion Formula                          | m/z      | err [ppm] |
|-----------|--------------------------------------|----------|-----------|
| 350.0068  | C <sub>12</sub> H <sub>17</sub> INOS | 350.0070 | 0.6       |

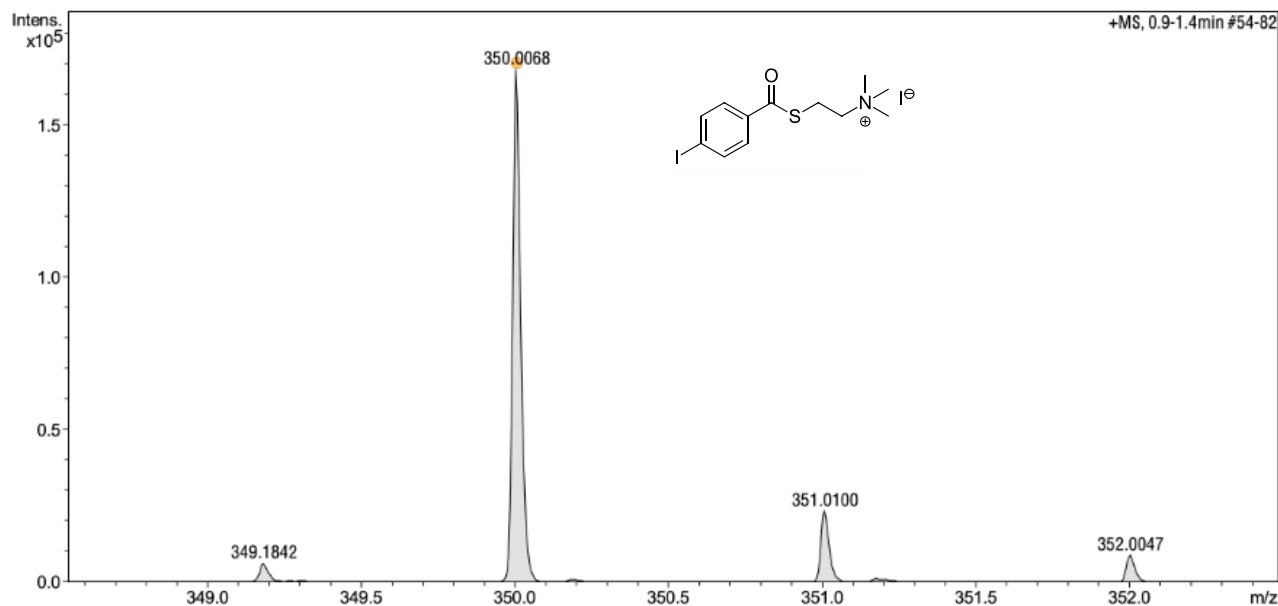

Oct 14 2022\000004.d

Bruker Compass DataAnalysis 4.3

printed: 2022-10-14 10:57:16 AM

by: x

Page 1 of 1



(6) 2-[(*p*-Iodobenzoyl)thio]-1-(trimethylammonio)ethane Iodide HPLC

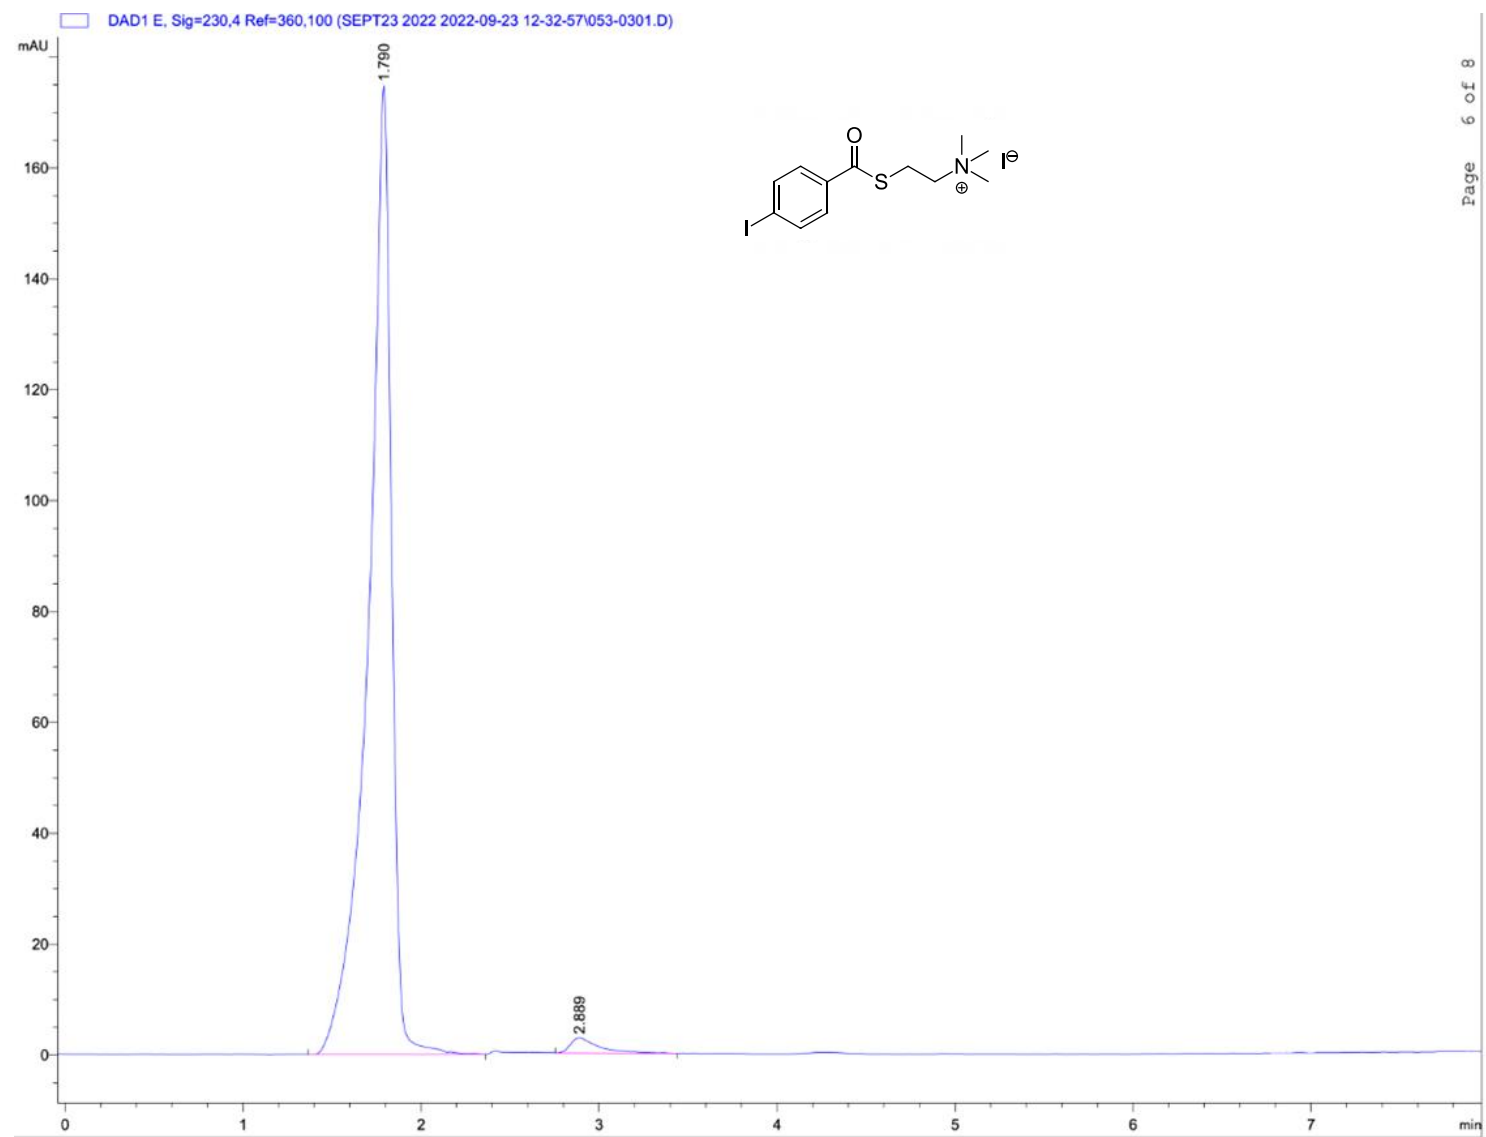

## *Alkyl N-Methylpiperidinyl Derivatives*

### (7) *S*-(1-Methylpiperid-4-yl) Ethanethioate Hydrochloride

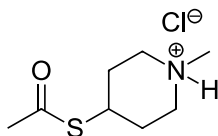

#### *Synthesis:*

***S*-(1-Methylpiperid-4-yl) Ethanethioate:** *N*-Methyl-4-piperidinethiol (0.50 mL, 4.2 mmol) was dissolved in anhydrous dichloromethane (5 mL), cooled to 0°C with an ice bath and stirred under an argon atmosphere. Acetyl chloride (0.895 mL, 12.6 mmol) was added dropwise at 0°C. The ice bath was removed after 5 mins, and reaction was stirred for 2 hrs at room temperature. After this time, saturated NaHCO<sub>3(aq)</sub> (10 mL) was added to the reaction and the layers were separated. The organic layer was extracted with dichloromethane (3 × 15 mL). The combined organic layers were dried over Na<sub>2</sub>SO<sub>4</sub>, gravity filtered and the filtrate was concentrated *in vacuo* to produce a clear colourless oil *S*-(1-methylpiperid-4-yl) ethanethioate (0.303 g, 42%). The analytical data was similar to previously published data.<sup>[1]</sup>

***S*-(1-Methylpiperid-4-yl) Ethanethioate Hydrochloride:** *S*-(1-Methylpiperid-4-yl) ethanethioate (0.245 g, 2.78 mmol) was dissolved in anhydrous diethyl ether (28 mL) under an argon atmosphere. HCl in diethyl ether (1 N - 2.11 mL, 2.11 mmol) was added dropwise and stirred for 1 hr. The solvent was removed *in vacuo* resulting in a white solid. The compound was triturated with diethyl ether (3 × 20 mL). Residual diethyl ether was removed *in vacuo* to produce *S*-(1-methylpiperid-4-yl) ethanethioate hydrochloride (0.198 g, 67% yield) as a pair of isomers (25:75).

*Spectroscopic data:*

MP<sub>(diethyl ether)</sub>: 157–159°C; IR(ATR) 3007, 2921, 2478, 2418, 1687, 1120, 973, 635 cm<sup>-1</sup>; <sup>1</sup>H NMR (400 MHz, DMSO-*d*<sub>6</sub>) δ isomer A: 10.29 (br s, 1H), 3.51-3.38 (m, 3H), 3.10-3.03 (m, 2H), 2.70 (s, 3H), 2.33 (s, 3H), 2.04-2.01 (m, 2H), 1.88-1.79 (m, 2H), isomer B: 10.29 (br s, 1H), 3.84 (br s, 1H), 3.41-3.38 (m, 2H), 2.98-2.92 (m, 2H), 2.75 (s, 3H), 2.33 (s, 3H), 2.25-2.18 (m, 2H), 1.88-1.79 (m, 2H); <sup>13</sup>C NMR (100.7 MHz, DMSO-*d*<sub>6</sub>) δ isomer A: 194.6 (0), 52.9 (2), 42.4 (3), 36.7 (1), 30.7 (3), 28.8, isomer B: 194.7 (0), 50.1 (2), 41.8 (3), 36.3 (1), 28.8 (2), 27.2 (3); LRMS (ESI<sup>+</sup>): 174.1 (M<sup>+</sup>); HRMS (ESI<sup>+</sup>): calculated for C<sub>8</sub>H<sub>16</sub>NOS<sup>+</sup>: 174.0947 amu; found for C<sub>8</sub>H<sub>16</sub>NOS<sup>+</sup>: 174.0946 amu; HPLC purity at 254 nm (75% CH<sub>3</sub>CN : 10% CH<sub>3</sub>OH : 15% aqueous triethylamine [0.1% triethylamine in H<sub>2</sub>O], retention time 3.685 mins): 98.7%.

(7) *S*-(1-Methylpiperid-4-yl) Ethanethioate Hydrochloride IR(ATR)

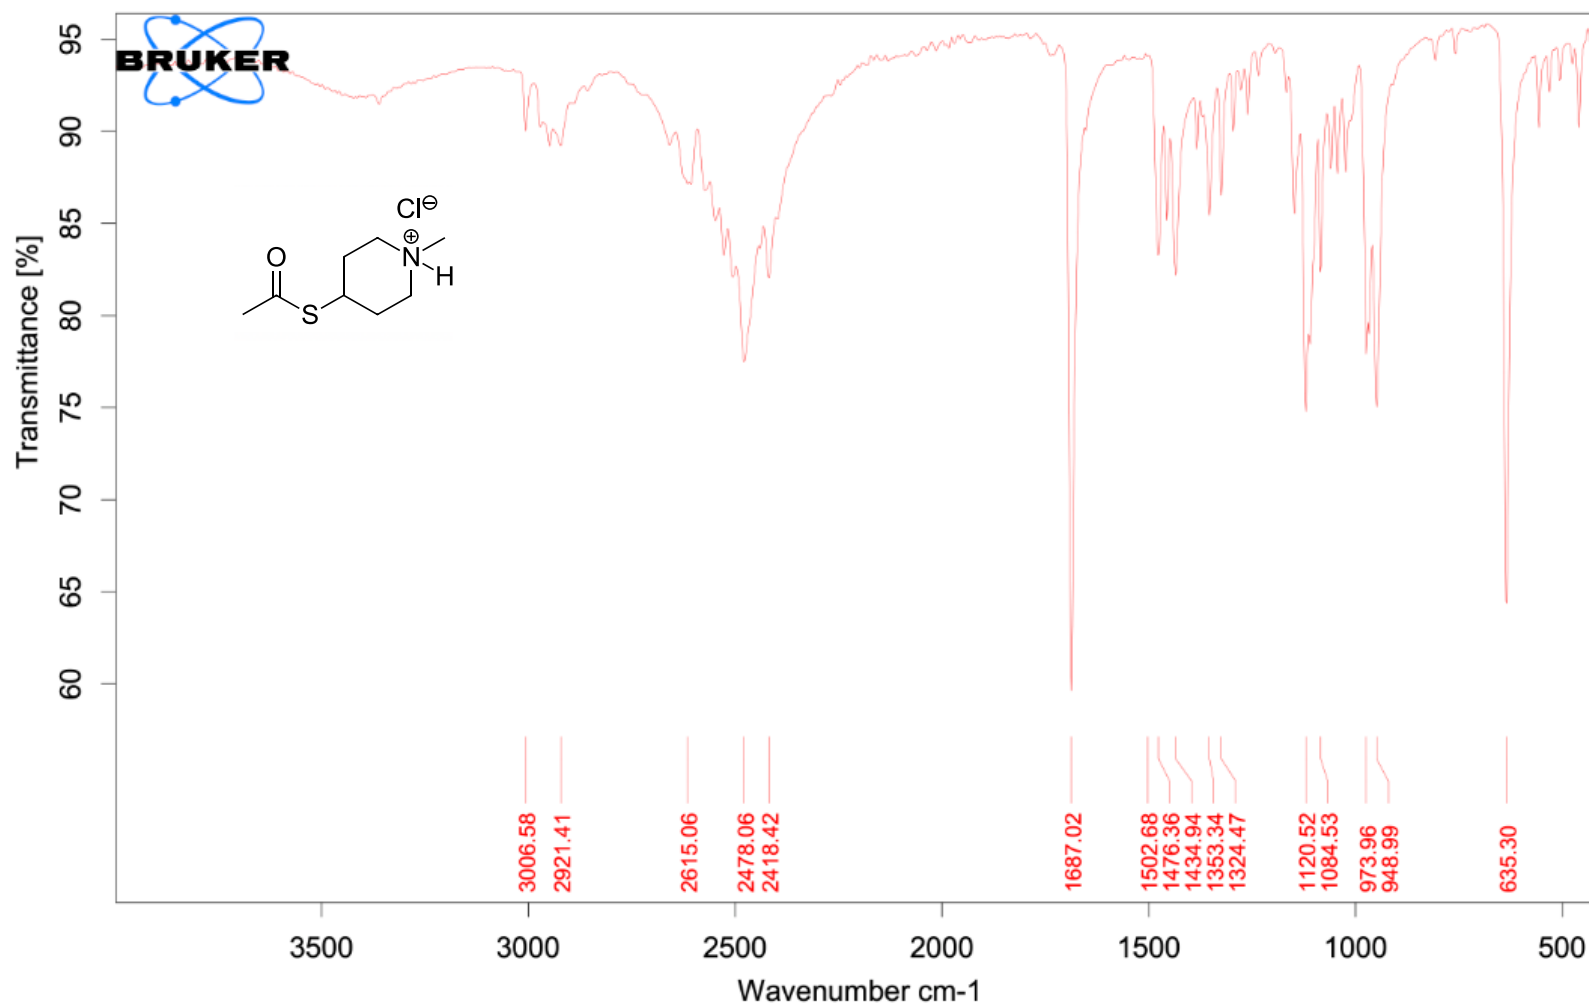

(7) *S*-(1-Methylpiperid-4-yl) Ethanethioate Hydrochloride <sup>1</sup>H NMR 400 MHz (DMSO-*d*<sub>6</sub>)

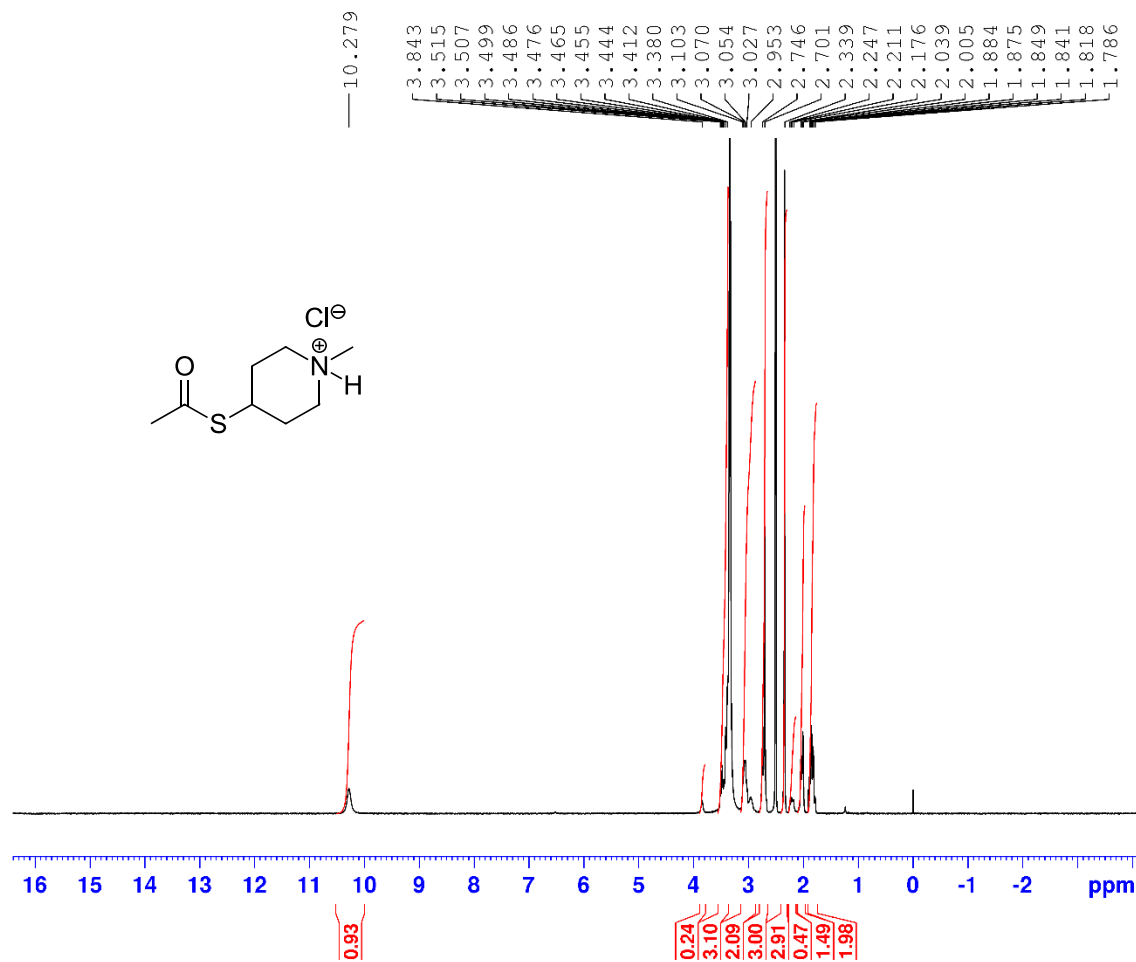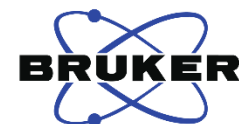

Current Data Parameters  
NAME MD-1-195  
EXPNO 2  
PROCNO 1

F2 - Acquisition Parameters  
Date\_ 20220429  
Time 11.38 h  
INSTRUM AVN 400  
PROBHD Z163739\_0038 ( )  
PULPROG zg30  
TD 65536  
SOLVENT DMSO  
NS 16  
DS 2  
SWH 8196.722 Hz  
FIDRES 0.250144 Hz  
AQ 3.9976959 sec  
RG 101  
DW 61.000 usec  
DE 13.54 usec  
TE 298.0 K  
D1 1.00000000 sec  
TDO 1  
SFO1 400.3024719 MHz  
NUC1 1H  
P0 3.33 usec  
P1 10.00 usec  
PLW1 14.12800026 W

F2 - Processing parameters  
SI 65536  
SF 400.3000028 MHz  
WDW EM  
SSB 0  
LB 0.30 Hz  
GB 0  
PC 1.00

(7) *S*-(1-Methylpiperid-4-yl) Ethanethioate Hydrochloride <sup>13</sup>C NMR 100 MHz (DMSO-*d*<sub>6</sub>)

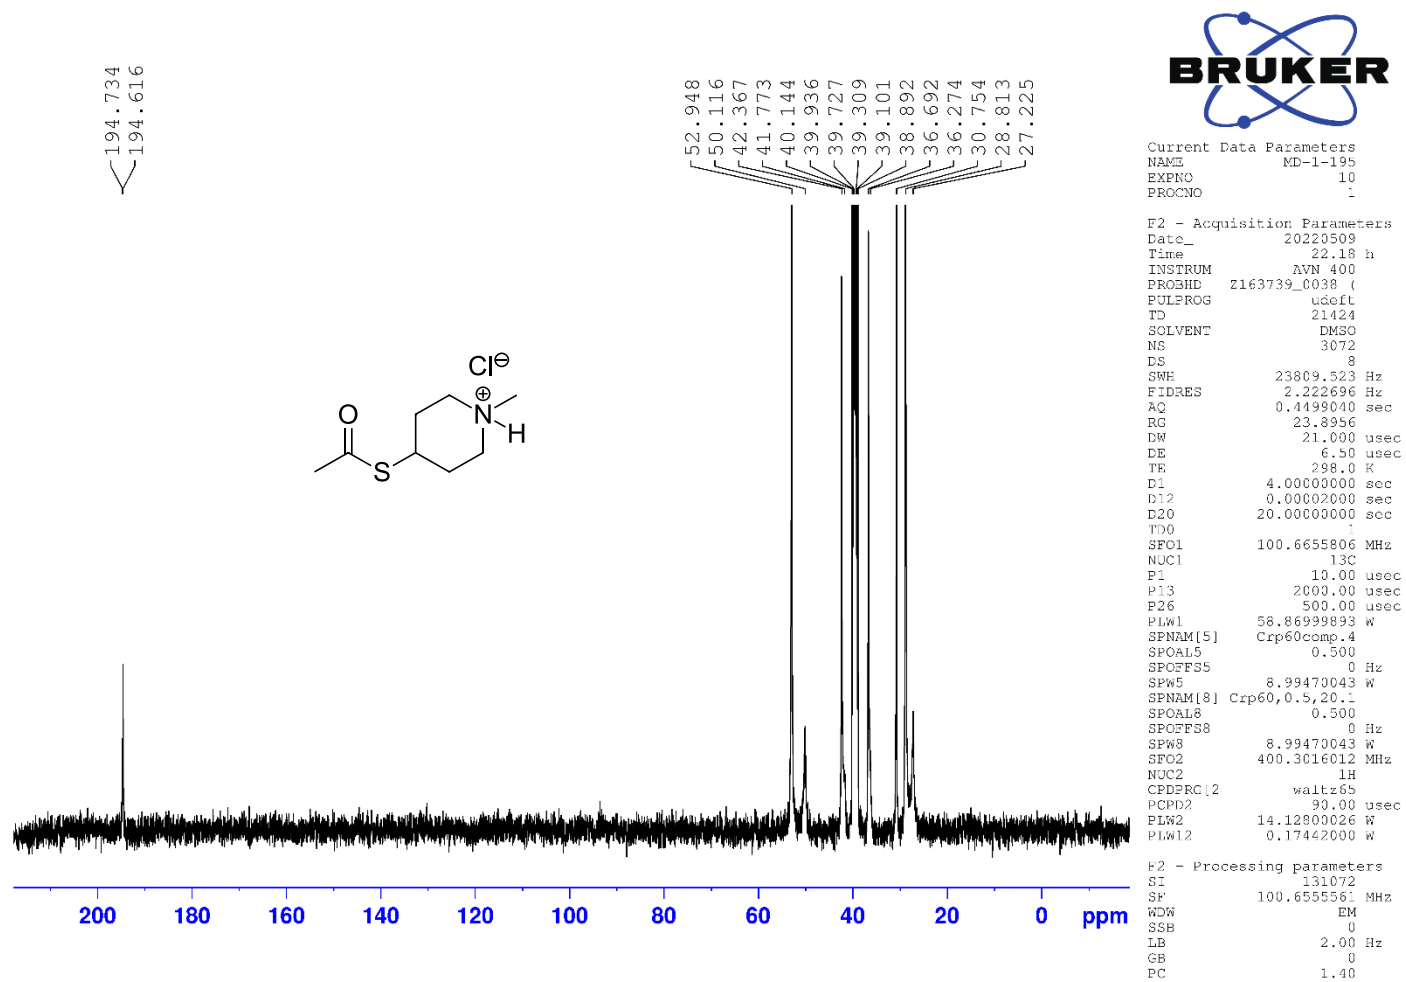

(7) *S*-(1-Methylpiperid-4-yl) Ethanethioate Hydrochloride High Resolution Mass Spectrum (ESI, positive mode)

### Mass Spectrum SmartFormula Report

**Analysis Info**

Analysis Name D:\Data\Xiao\July 07 2022\000002.d  
Method Xiao all 1.m  
Sample Name TRV 6008 HCl  
Comment

Acquisition Date 7/7/2022 9:07:46 AM  
Operator x  
Instrument compact 8255754.20059

**Acquisition Parameter**

|             |            |                      |          |                  |           |
|-------------|------------|----------------------|----------|------------------|-----------|
| Source Type | ESI        | Ion Polarity         | Positive | Set Nebulizer    | 0.5 Bar   |
| Focus       | Not active | Set Capillary        | 3500 V   | Set Dry Heater   | 180 °C    |
| Scan Begin  | 50 m/z     | Set End Plate Offset | -500 V   | Set Dry Gas      | 4.0 l/min |
| Scan End    | 1500 m/z   | Set Charging Voltage | 2000 V   | Set Divert Valve | Source    |
|             |            | Set Corona           | 0 nA     | Set APCI Heater  | 0 °C      |

| Meas. m/z | Ion Formula                        | m/z      | err [ppm] |
|-----------|------------------------------------|----------|-----------|
| 174.0946  | C <sub>8</sub> H <sub>16</sub> NOS | 174.0947 | 0.6       |

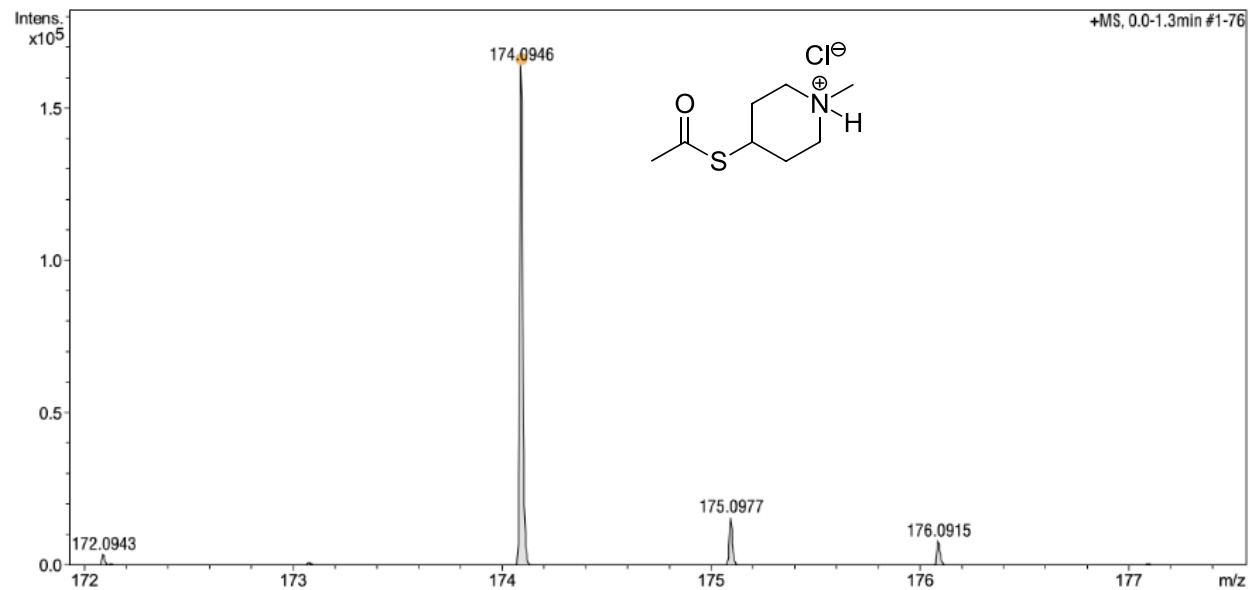

July 07 2022\000002.d

Bruker Compass DataAnalysis 4.3

printed: 7/7/2022 9:10:37 AM

by: x

Page 1 of 1

(7) *S*-(1-Methylpiperid-4-yl) Ethanethioate Hydrochloride HPLC

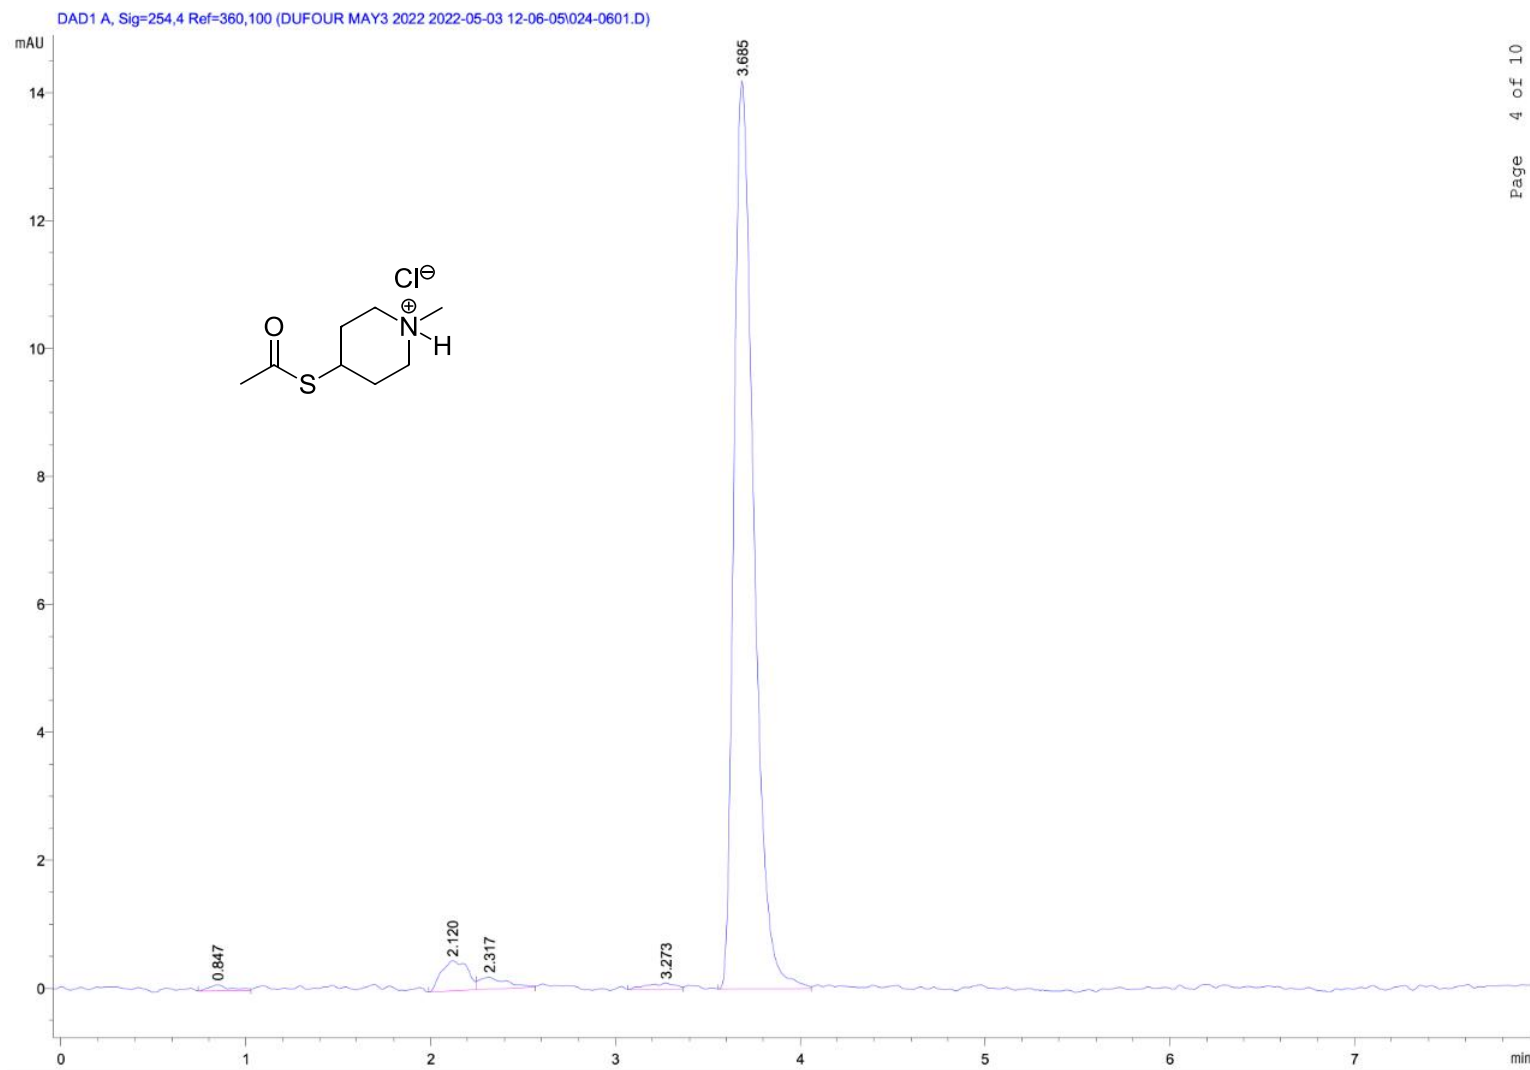



**(8) 4-Acetoxy-1-methyl-1-piperidinium Chloride**

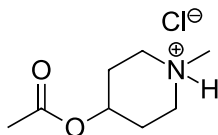

*Synthesis:*

**1-Methyl-4-piperidyl Acetate:** A slightly modified procedure published by Bormans *et al.*<sup>[2]</sup> was used to produce 1-methyl-4-piperidyl acetate. Briefly, *N*-methyl-4-piperidinol (1.52 g, 9.80 mmol) was dissolved in anhydrous dichloromethane (26 mL) and stirred under an argon atmosphere. Triethylamine (2.73 mL, 19.6 mmol) was added, and the reaction mixture was cooled to 0°C with an ice bath. Acetyl chloride (0.906 mL, 12.74 mmol) was added dropwise to the reaction mixture at 0°C. The ice bath was removed after 5 mins, and reaction was stirred for 2 hrs at room temperature. After this time, brine (20 mL) was added to the reaction and the layers were separated. The aqueous layer was extracted with dichloromethane (3 × 15 mL), and combined organic layers were dried over Na<sub>2</sub>SO<sub>3</sub> then gravity filtered. The filtrate was concentrated *in vacuo* to produce an orange oil, 1-methyl-4-piperidyl acetate (1.54 g, 97%). The analytical data was similar to previously published data.<sup>[2]</sup>

**4-Acetoxy-1-methyl-1-piperidinium Chloride:** To a flask charged with 1-methyl-4-piperidyl acetate (0.436 g, 2.78 mmol), anhydrous diethyl ether (55 mL) was added until complete dissolution under an argon atmosphere. HCl dissolved in diethyl ether (1 N - 4.16 mL, 4.16 mmol) was added dropwise to the 1-methyl-4-piperidyl acetate solution and stirred for 1h at room temperature. The solvent was removed *in vacuo* resulting in a white solid. The compound was triturated with diethyl ether (3 × 20 mL). Residue diethyl ether was removed *in vacuo* to produce 4-acetoxy-1-methyl-1-piperidinium chloride (0.538 g, 99%) as a pair of isomers

(46:54).

*Spectroscopic data:*

MP<sub>(diethyl ether)</sub>: 82-87°C; IR(ATR) 2958, 2603, 2460, 2427, 1730, 1237, 1037 cm<sup>-1</sup>; <sup>1</sup>H NMR (400 MHz, DMSO-*d*<sub>6</sub>) δ isomer A: 10.90 (br s, 1H), 4.83-4.75 (m, 1H), 3.45-3.43 (m, 1H), 3.28-3.25 (m, 1H), 3.10-3.00 (m, 2H), 2.68 (d, J = 4.8 Hz, 3H), 2.08-2.01 (m, 2H), 2.01 (s, 3H), 1.92-1.86 (m, 2H), isomer B: 10.77 (br s, 1H), 4.95-4.93 (m, 1H), 3.45-3.43 (m, 1H), 3.28-3.25 (m, 1H), 3.10-3.00 (m, 2H), 2.73 (d, J = 4.9 Hz, 3H), 2.08-2.01 (m, 2H), 2.05 (s, 3H), 1.92-1.86 (m, 2H); <sup>13</sup>C NMR (100.7 MHz, DMSO-*d*<sub>6</sub>) δ isomer a: 169.8 (0), 67.3 (1), 48.7 (2), 41.9 (3), 27.8 (2), 21.0 (3), isomer B: 169.0 (0), 63.7 (1), 51.4 (2), 42.4 (3), 26.5 (2), 21.0 (3); LRMS (ESI<sup>+</sup>): 158.1 (M<sup>+</sup>); HRMS (ESI<sup>+</sup>): calculated for C<sub>8</sub>H<sub>16</sub>NO<sub>2</sub><sup>+</sup>: 158.1176 amu; found for C<sub>8</sub>H<sub>16</sub>NO<sub>2</sub><sup>+</sup>: 158.1176 amu; HPLC purity at 210 nm (75% CH<sub>3</sub>CN : 10% CH<sub>3</sub>OH : 15% aqueous triethylamine [0.1% triethylamine in H<sub>2</sub>O], retention time 3.333 mins): >99%. Product was confirmed through comparison of key peaks reported from <sup>1</sup>H NMR in the literature.<sup>[3]</sup>

(8) 4-Acetoxy-1-methyl-1-piperidinium Chloride IR(ATR)

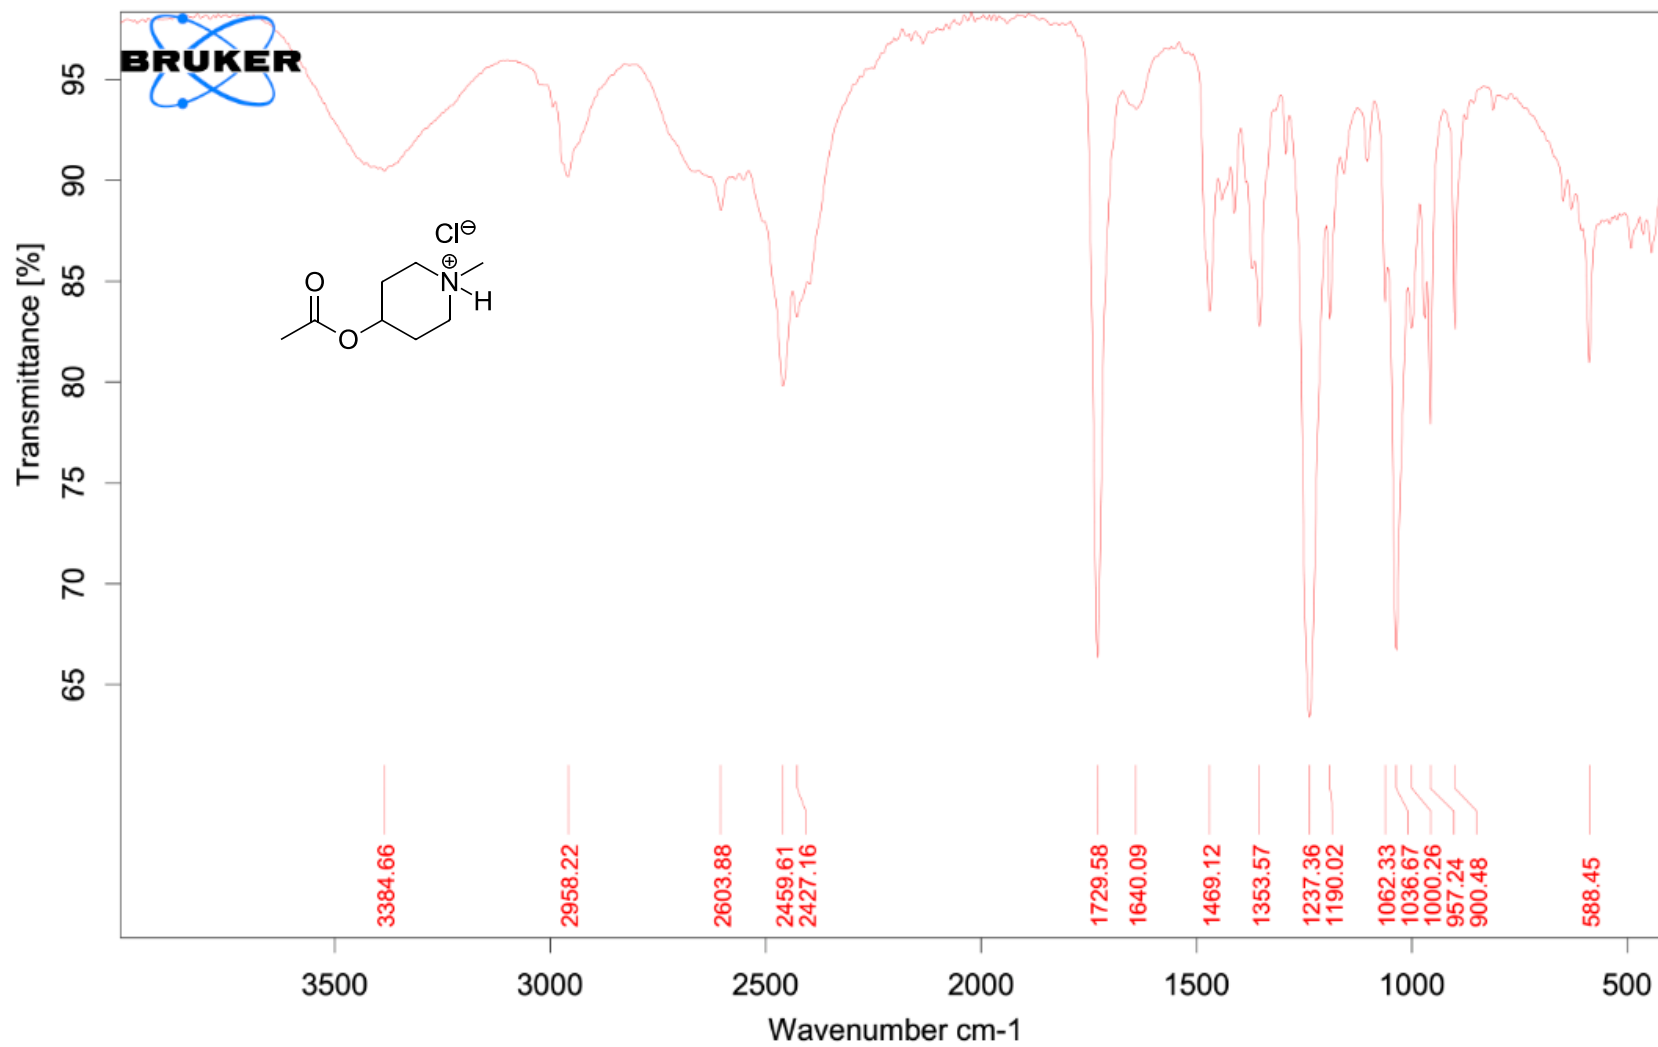

(8) 4-Acetoxy-1-methyl-1-piperidinium Chloride <sup>1</sup>H NMR 400 MHz (DMSO-d<sub>6</sub>)

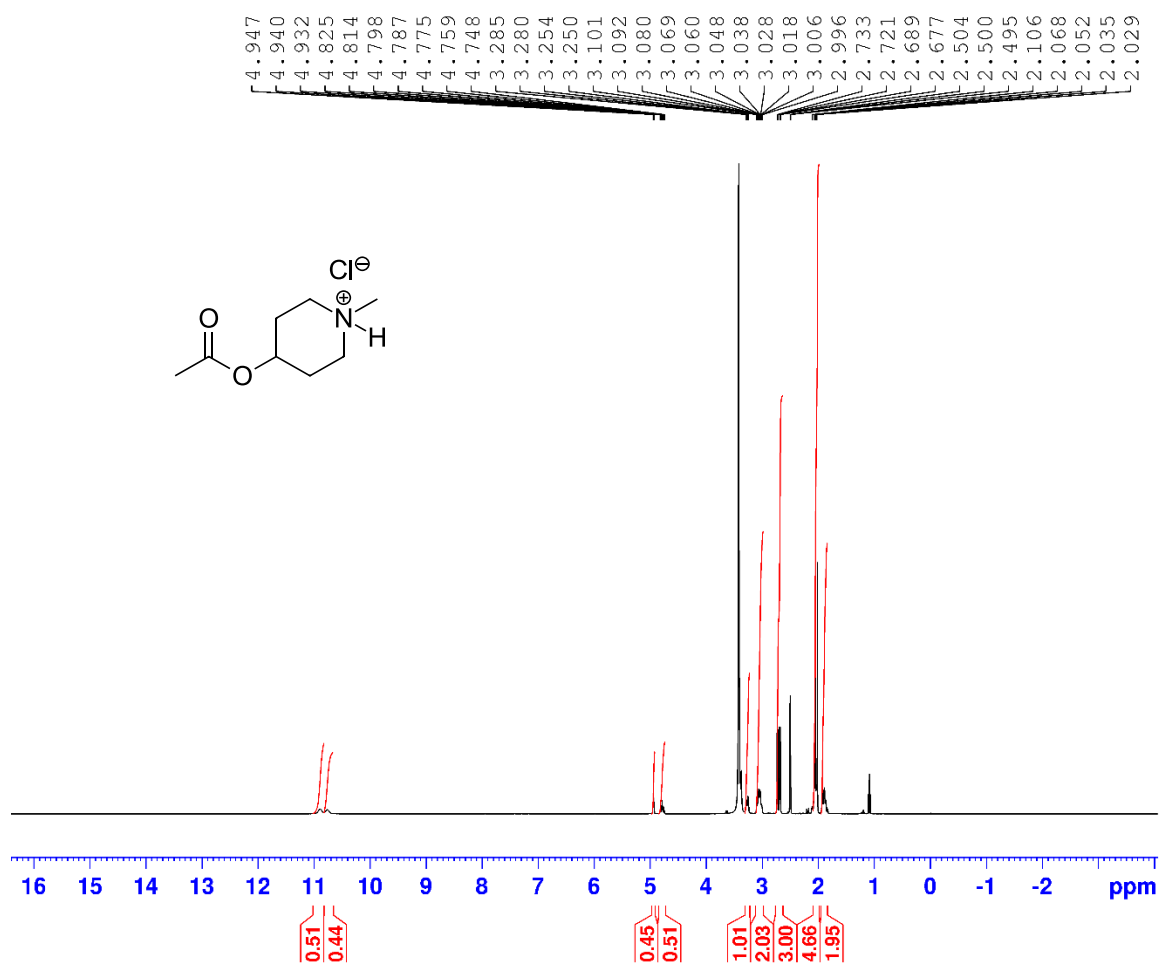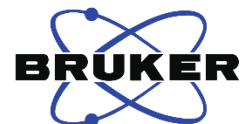

Current Data Parameters  
 NAME MD-1-187 DMSO 2D  
 EXPNO 1  
 PROCNO 1

F2 - Acquisition Parameters  
 Date\_ 20220504  
 Time 10.42 h  
 INSTRUM AVN 400  
 PROBHD Z163739\_0038 (  
 PULPROG zg30  
 TD 65536  
 SOLVENT DMSO  
 NS 16  
 DS 2  
 SWH 8196.722 Hz  
 FIDRES 0.250144 Hz  
 AQ 3.9976939 sec  
 RG 101  
 DW 61.000 usec  
 DE 13.54 usec  
 TE 298.0 K  
 D1 1.00000000 sec  
 TD0 1  
 SFO1 400.3024719 MHz  
 NUC1 1H  
 P0 3.33 usec  
 P1 10.00 usec  
 PLW1 14.12800026 W

F2 - Processing parameters  
 SI 65536  
 SF 400.3000028 MHz  
 WDW EM  
 SSB 0  
 LB 0.30 Hz  
 GB 0  
 PC 1.00

(8) 4-Acetoxy-1-methyl-1-piperidinium Chloride <sup>13</sup>C NMR 100 MHz (DMSO-d<sub>6</sub>)

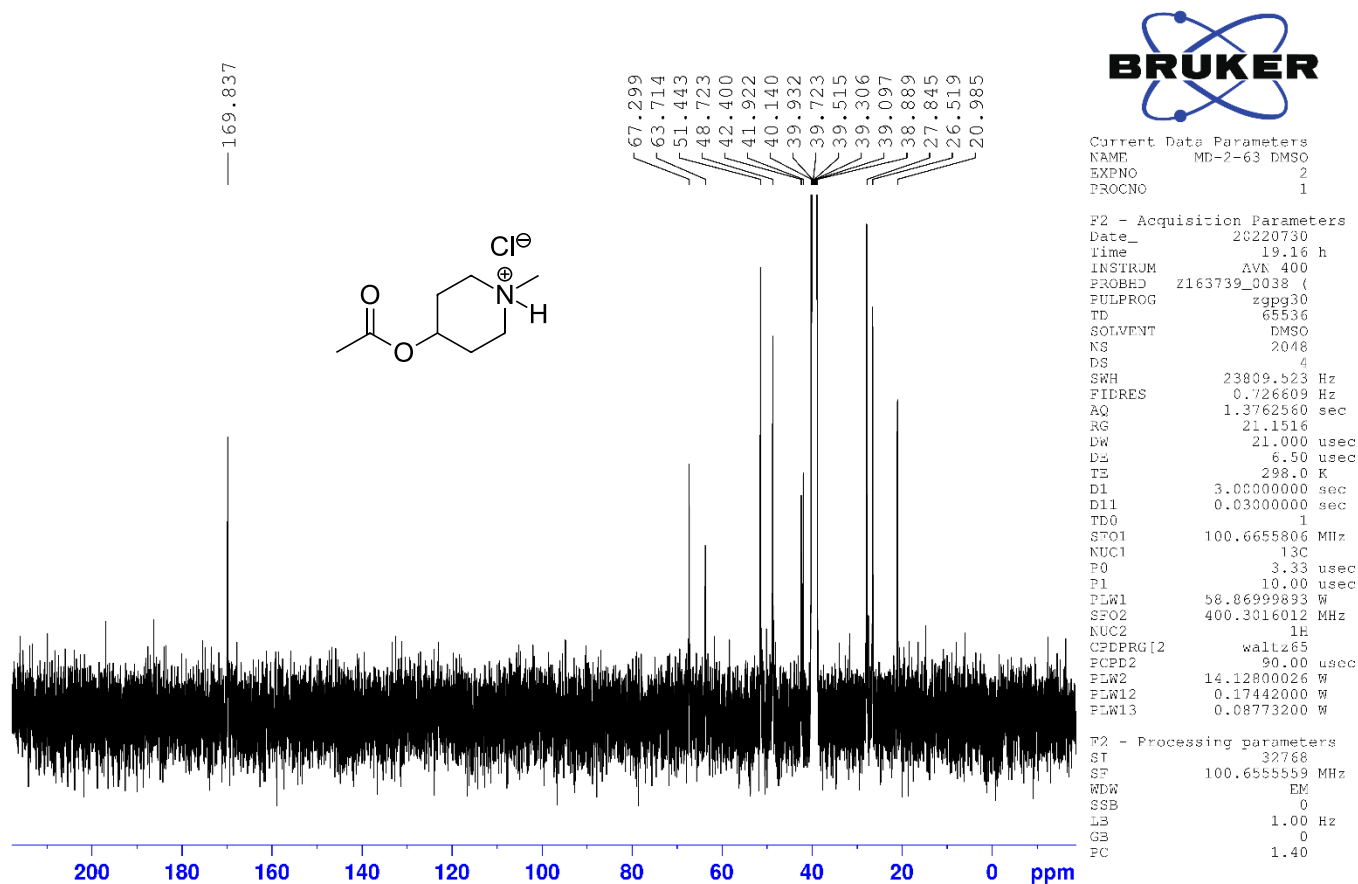

(8) 4-Acetoxy-1-methyl-1-piperidinium Chloride High Resolution Mass Spectrum (ESI, positive mode)

### Mass Spectrum SmartFormula Report

**Analysis Info**

Analysis Name D:\Data\Xiao\July 07 2022\000008.d  
Method Xiao all 1.m  
Sample Name TRV 6014 HCl  
Comment

Acquisition Date 7/7/2022 9:38:26 AM  
Operator x  
Instrument compact 8255754.20059

**Acquisition Parameter**

|             |            |                      |          |                  |           |
|-------------|------------|----------------------|----------|------------------|-----------|
| Source Type | ESI        | Ion Polarity         | Positive | Set Nebulizer    | 0.5 Bar   |
| Focus       | Not active | Set Capillary        | 3500 V   | Set Dry Heater   | 180 °C    |
| Scan Begin  | 50 m/z     | Set End Plate Offset | -500 V   | Set Dry Gas      | 4.0 l/min |
| Scan End    | 1500 m/z   | Set Charging Voltage | 2000 V   | Set Divert Valve | Source    |
|             |            | Set Corona           | 0 nA     | Set APCI Heater  | 0 °C      |

| Meas. m/z | Ion Formula | m/z      | err [ppm] |
|-----------|-------------|----------|-----------|
| 158.1176  | C8H16NO2    | 158.1176 | -0.3      |

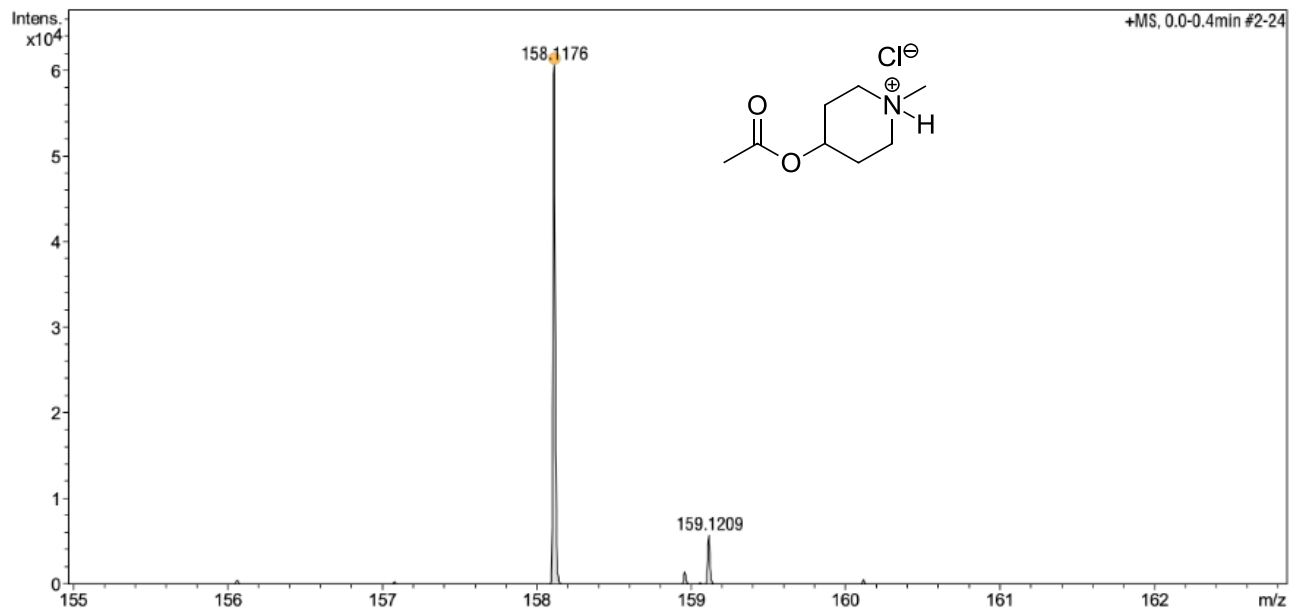

(8) 4-Acetoxy-1-methyl-1-piperidinium Chloride HPLC. Note: Noise from the injection has a retention time from 1.6 min until 2.5 min. The compound of interest has a retention time of 3.333 min.

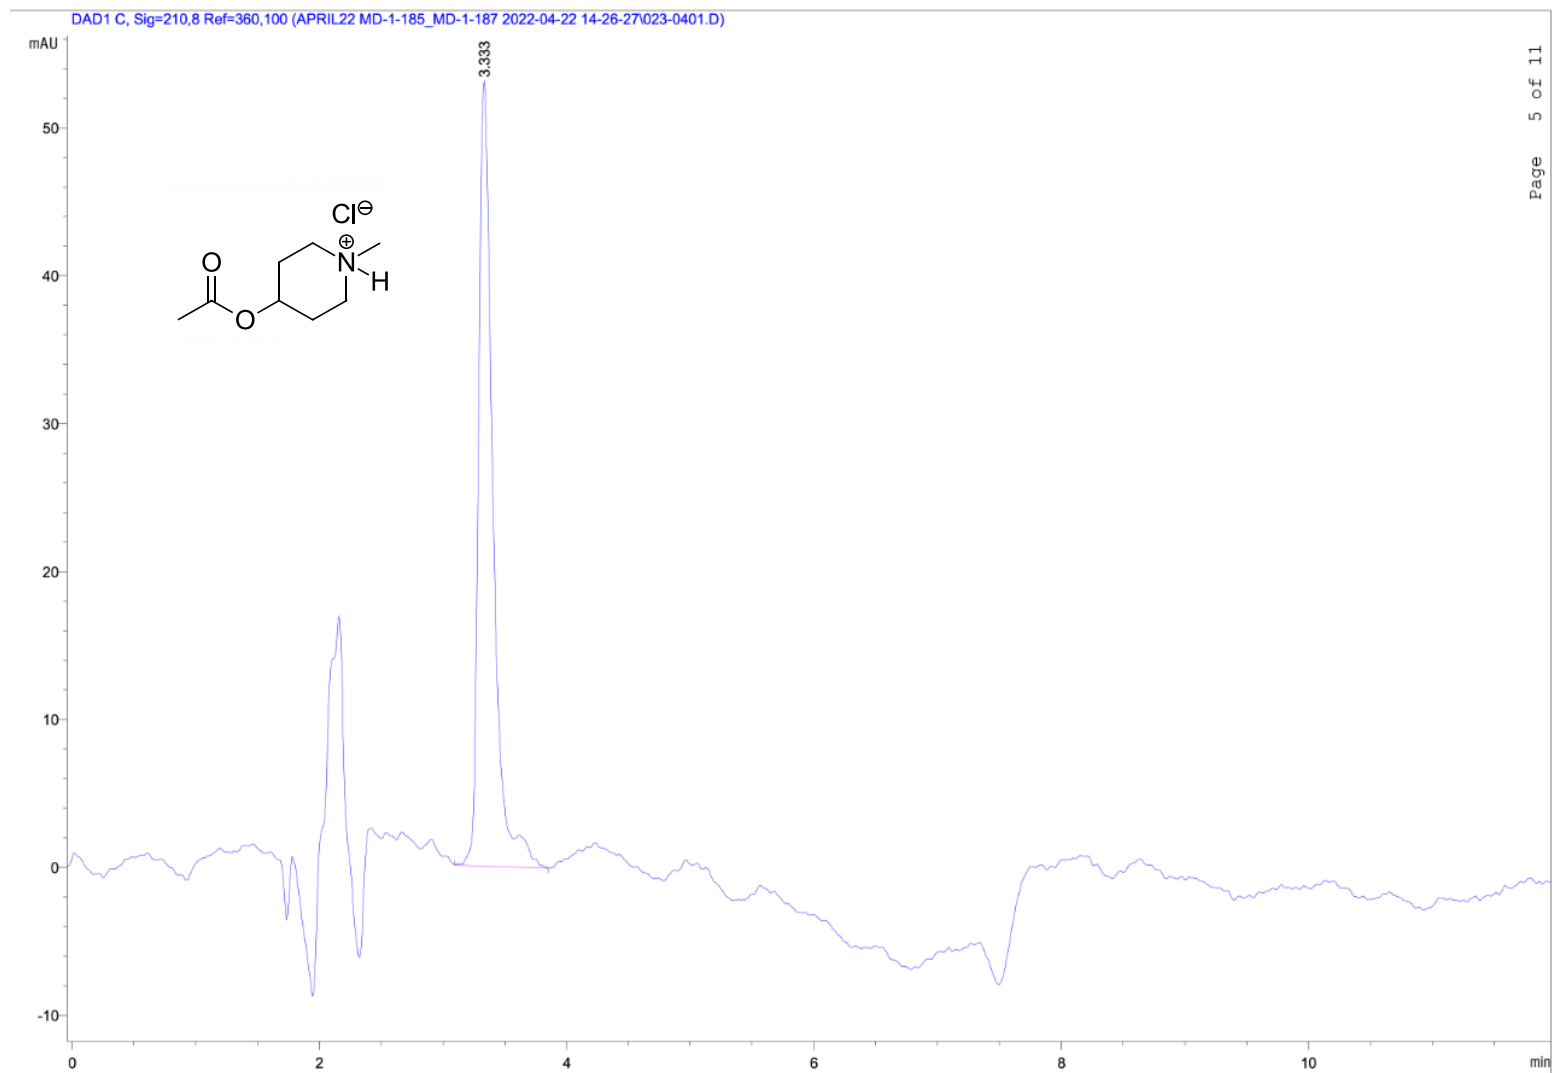

**(9) S-(1-Methylpiperid-4-yl) Butanethioate Hydrochloride**

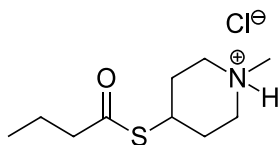

**Synthesis: S-(1-Methylpiperid-4-yl) butanethioate:** To a solution of *N*-methyl-4-piperidinethiol (0.50 mL, 4.2 mmol) in anhydrous dichloromethane (5 mL) cooled in an ice bath was added butyryl chloride (1.30 mL, 12.6 mmol) dropwise *via* syringe under an argon atmosphere. After 15 mins, the ice bath was removed and the mixture was allowed to stir for 16 hrs, until TLC indicated complete consumption of starting material. The mixture was diluted with dichloromethane (20 mL). The organic layer was washed with saturated NaHCO<sub>3(aq)</sub>, water and dried over Na<sub>2</sub>SO<sub>4</sub>. The mixture was gravity filtered and the filtrate was concentrated *in vacuo* to afford 0.846 g of a colorless liquid. Purification *via* flash chromatography (5 % MeOH / DCM) afforded 0.5373 g (64% yield) of **10** as a translucent colorless oil. The analytical data was similar to previously published data.<sup>[1]</sup>

**S-(1-Methylpiperid-4-yl) butanethioate, hydrochloride (10):** *S*-(1-Methylpiperid-4-yl) butanethioate (0.172 g, 0.854 mmol) was dissolved in anhydrous diethyl ether (17 mL) under an argon atmosphere. To this solution, HCl dissolved in diethyl ether (1 N - 1.28 mL, 1.28 mmol) was added dropwise and stirred for 1 hr. The solvent was removed *in vacuo* resulting in a white solid. The compound was triturated with diethyl ether (20 mL), and solvent was removed from the solid with a pipet. The process was repeated twice. The compound was dried *in vacuo* to produce **10** (0.180 g, 89%) as a white solid.

**Spectroscopic data:** MP<sub>(diethyl ether)</sub>: 142–146°C; IR (ATR) 3010, 2963, 2948, 2481, 1691, 1113, 998, 770; <sup>1</sup>H NMR (400 MHz, DMSO-*d*<sub>6</sub>) d Isomer A: 10.71 (br s, 1H), 3.52-3.46 (m, 1H),



3.40-3.37 (m, 2H), 3.10-3.02 (m, 2H), 2.68 (s, 3H), 2.56 (t, J = 7.2 Hz, 2H), 2.02-1.99 (m, 2H), 1.93-1.82 (m, 2H), 1.58 (sext, J = 7.3 Hz, 2H), 0.88 (t, J = 7.4 Hz, 3H), isomer B: 10.71 (br s, 1H), 3.86 (app br s, 1H), 3.40-3.37 (m, 2H), 2.97-2.90 (m, 2H), 2.73 (s, 3H), 2.56 (t, J = 7.2 Hz, 2H), 2.29, 2.22 (m, 2H), 1.93-1.82 (m, 2H), 1.58 (sext, J = 7.3 Hz, 2H), 0.88 (t, J = 7.4 Hz, 3H); <sup>13</sup>C NMR (100.7 MHz, DMSO-*d*<sub>6</sub>) d isomer A: 198.0 (0), 53.1 (2), 45.3 (2), 42.4 (3), 36.4 (1), 28.9 (2), 18.6 (2), 13.2 (3), isomer B: 198.0 (0), 50.2 (2), 45.6 (2), 41.7 (3), 35.8 (1), 27.3 (2), 18.6 (2), 13.2 (3); LRMS (ESI<sup>+</sup>): 202.1 (M<sup>+</sup>); HRMS (ESI<sup>+</sup>): calculated for C<sub>10</sub>H<sub>20</sub>NOS<sup>+</sup>: 202.1260; found for C<sub>10</sub>H<sub>20</sub>NOS<sup>+</sup>: 202.1261; HPLC purity at 254nm (75% CH<sub>3</sub>CN : 10% CH<sub>3</sub>OH : 15% aqueous triethylamine [0.1% triethylamine in H<sub>2</sub>O], retention time 5.212 mins): 99.1%.

(9) *S*-(1-Methylpiperid-4-yl) Butanethioate Hydrochloride IR(ATR)

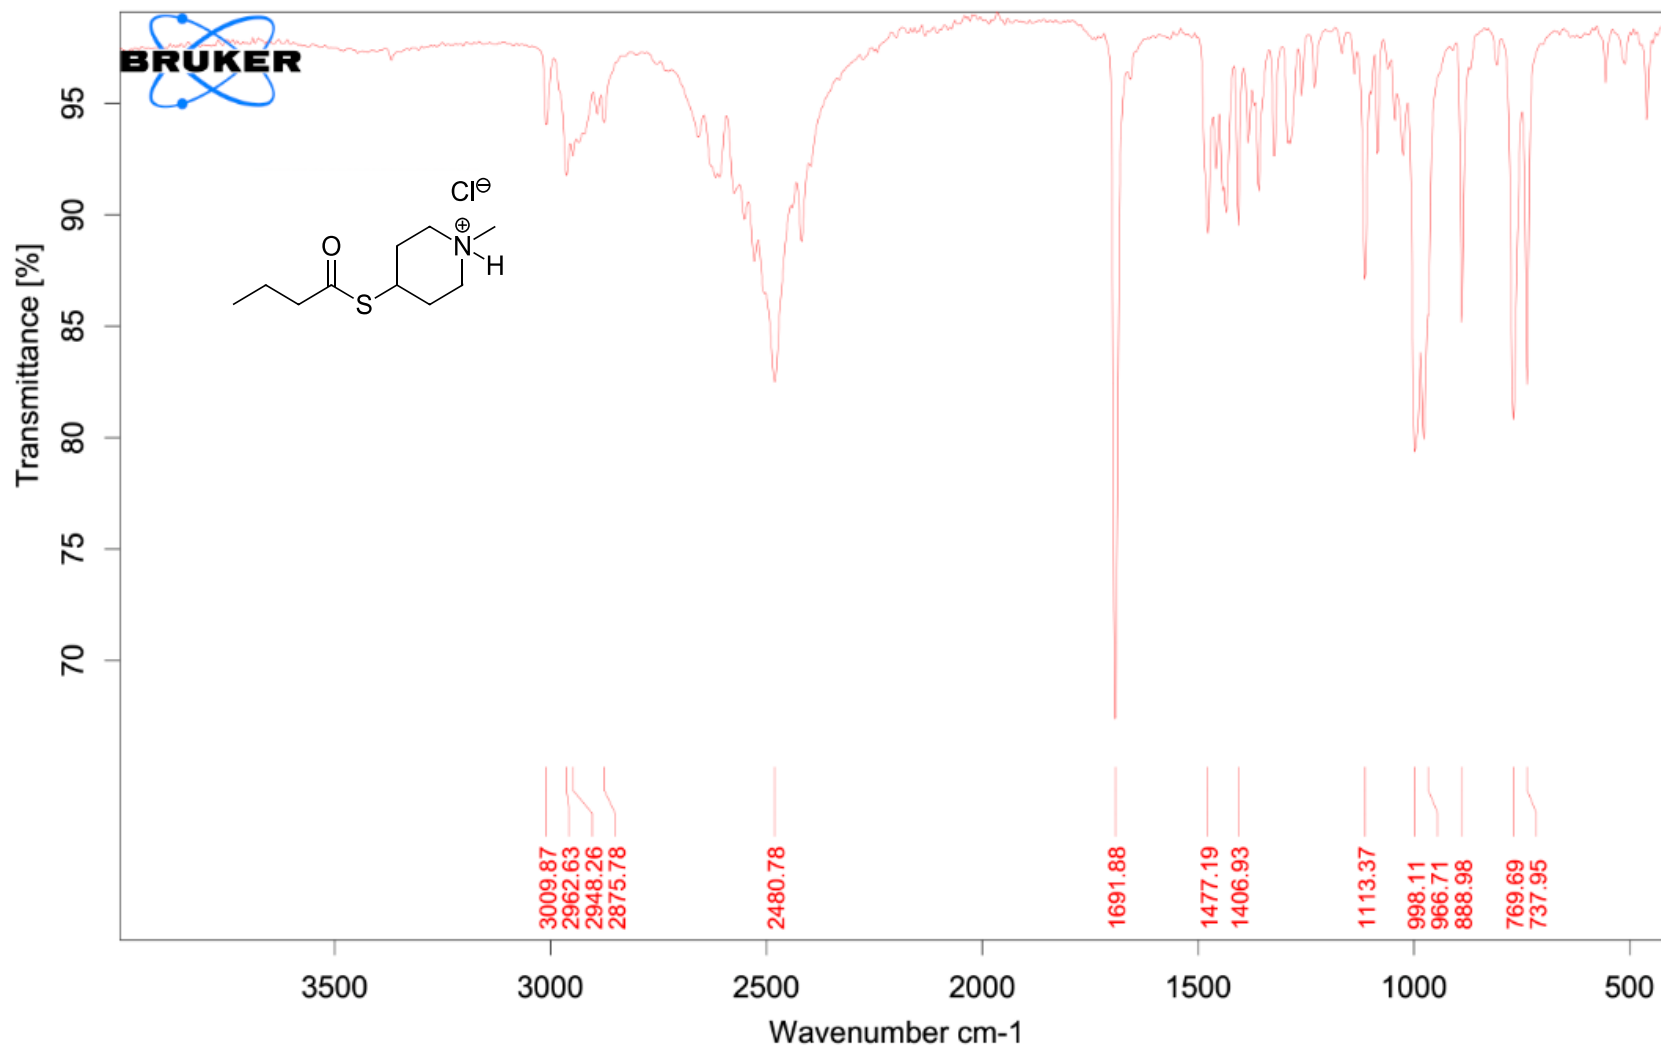

(9) *S*-(1-Methylpiperid-4-yl) Butanethioate Hydrochloride <sup>1</sup>H NMR 400 MHz (DMSO-*d*<sub>6</sub>)

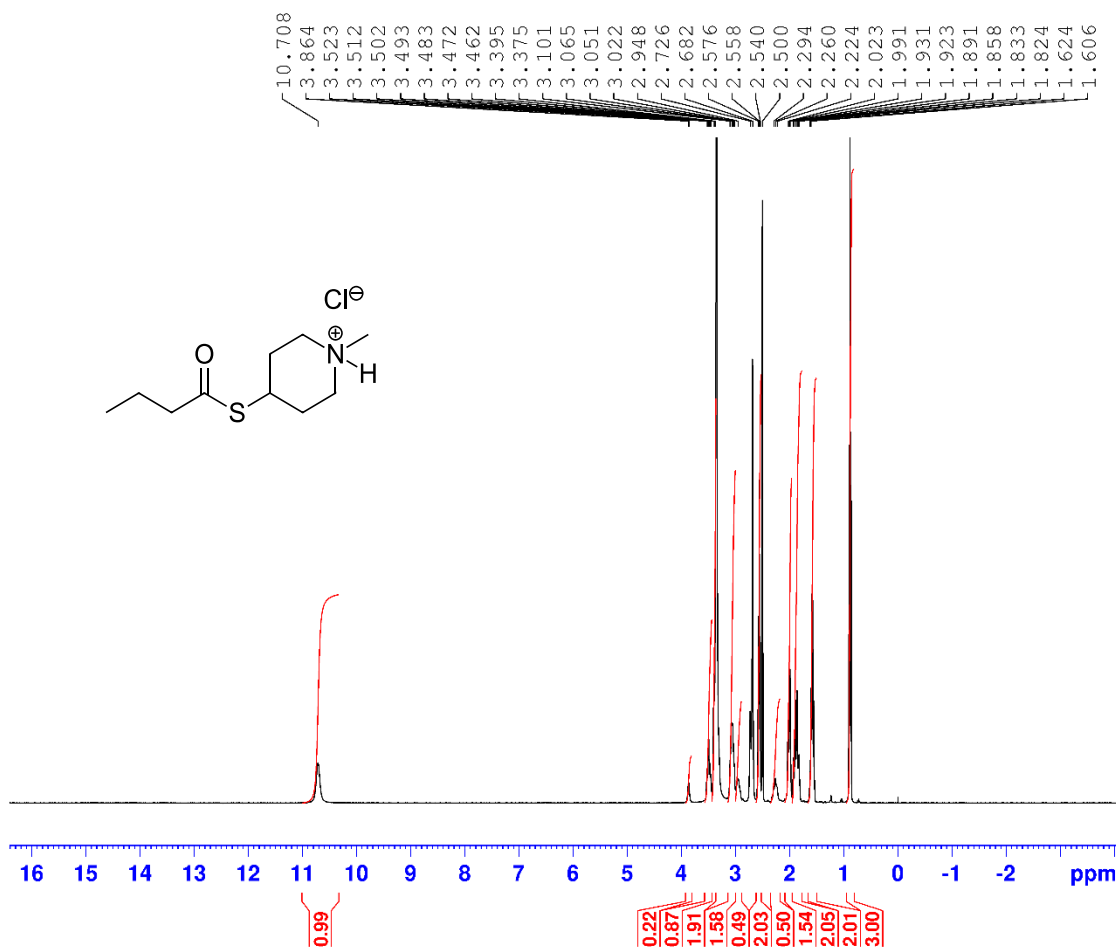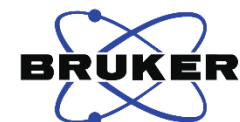

Current Data Parameters  
 NAME MD-1-191  
 EXPNO 1  
 PROCNO 1

F2 - Acquisition Parameters  
 Date\_ 20220425  
 Time 16.21 h  
 INSTRUM AVN 400  
 PROBHD Z163739\_0038 ( )  
 PULPROG zg30  
 TD 65536  
 SOLVENT DMSO  
 NS 16  
 DS 2  
 SWH 8196.722 Hz  
 FIDRES 0.250144 Hz  
 AQ 3.9976959 sec  
 RG 101  
 DW 61.000 usec  
 DF 13.54 usec  
 TF 298.0 K  
 D1 1.0000000 sec  
 TD0 1  
 SF01 400.3024719 MHz  
 NUC1 1H  
 P0 3.33 usec  
 P1 10.00 usec  
 PLW1 14.12800026 W

F2 - Processing parameters  
 SI 65536  
 SF 400.3000026 MHz  
 WDW EM  
 SSB 0  
 LB 0.30 Hz  
 GB 0  
 PC 1.00

(9) *S*-(1-Methylpiperid-4-yl) Butanethioate Hydrochloride <sup>13</sup>C NMR 100 MHz (DMSO-*d*<sub>6</sub>)

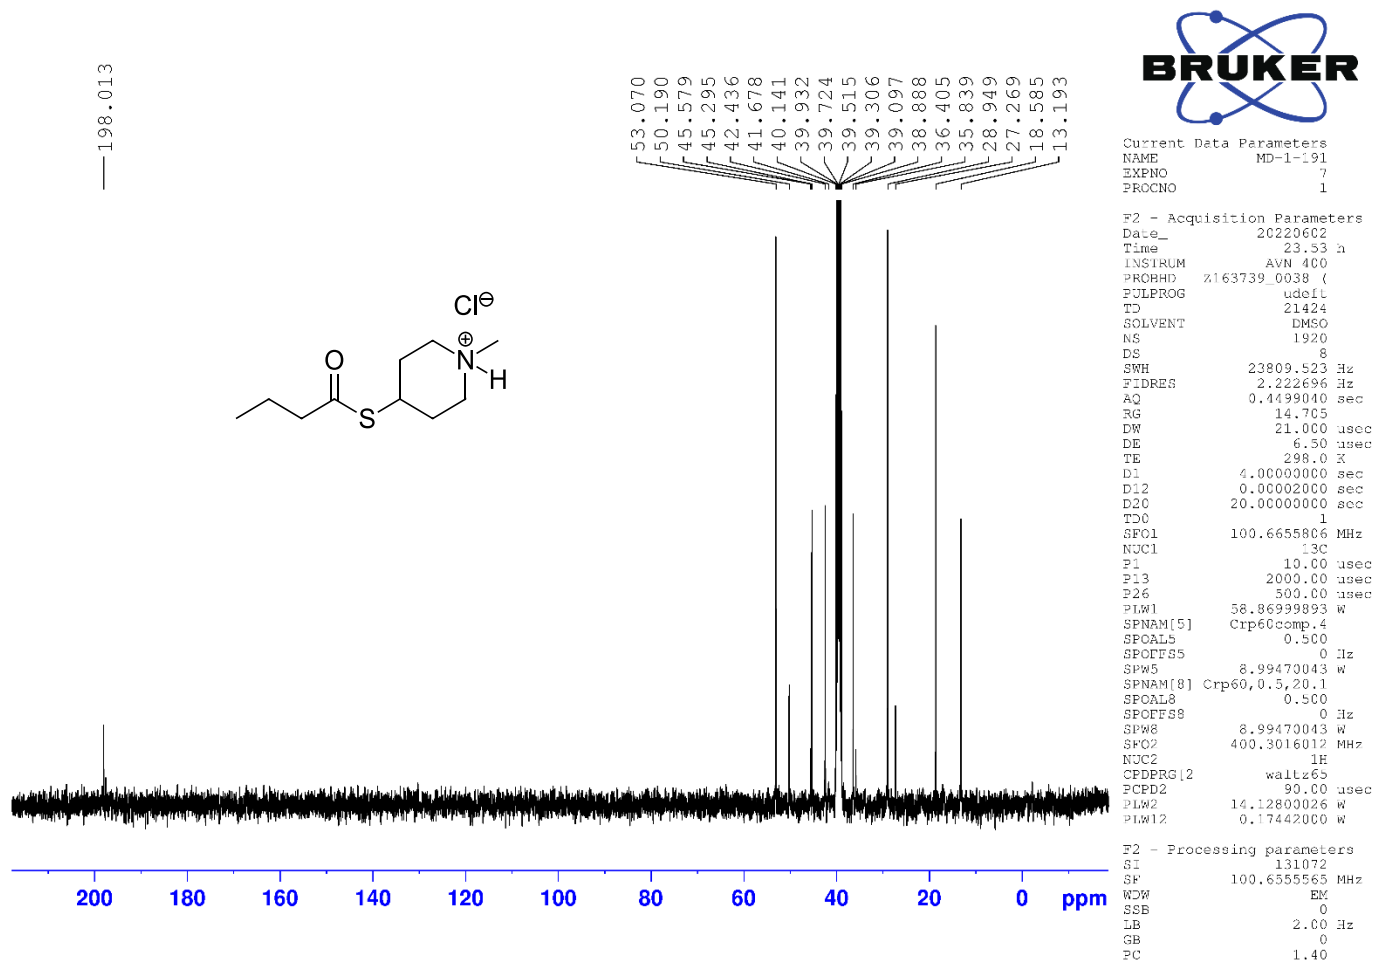

(9) *S*-(1-Methylpiperid-4-yl) Butanethioate Hydrochloride High Resolution Mass Spectrum (ESI, positive mode)

### Mass Spectrum SmartFormula Report

**Analysis Info**

Analysis Name D:\Data\Xiao\July 07 2022\000004.d  
Method Xiao all 1.m  
Sample Name TRV 6010 HCl  
Comment

Acquisition Date 7/7/2022 9:17:31 AM  
Operator x  
Instrument compact 8255754.20059

**Acquisition Parameter**

|             |            |                      |          |                  |           |
|-------------|------------|----------------------|----------|------------------|-----------|
| Source Type | ESI        | Ion Polarity         | Positive | Set Nebulizer    | 0.5 Bar   |
| Focus       | Not active | Set Capillary        | 3500 V   | Set Dry Heater   | 180 °C    |
| Scan Begin  | 50 m/z     | Set End Plate Offset | -500 V   | Set Dry Gas      | 4.0 l/min |
| Scan End    | 1500 m/z   | Set Charging Voltage | 2000 V   | Set Divert Valve | Source    |
|             |            | Set Corona           | 0 nA     | Set APCI Heater  | 0 °C      |

| Meas. m/z | Ion Formula                         | m/z      | err [ppm] |
|-----------|-------------------------------------|----------|-----------|
| 202.1261  | C <sub>10</sub> H <sub>20</sub> NOS | 202.1260 | -0.4      |

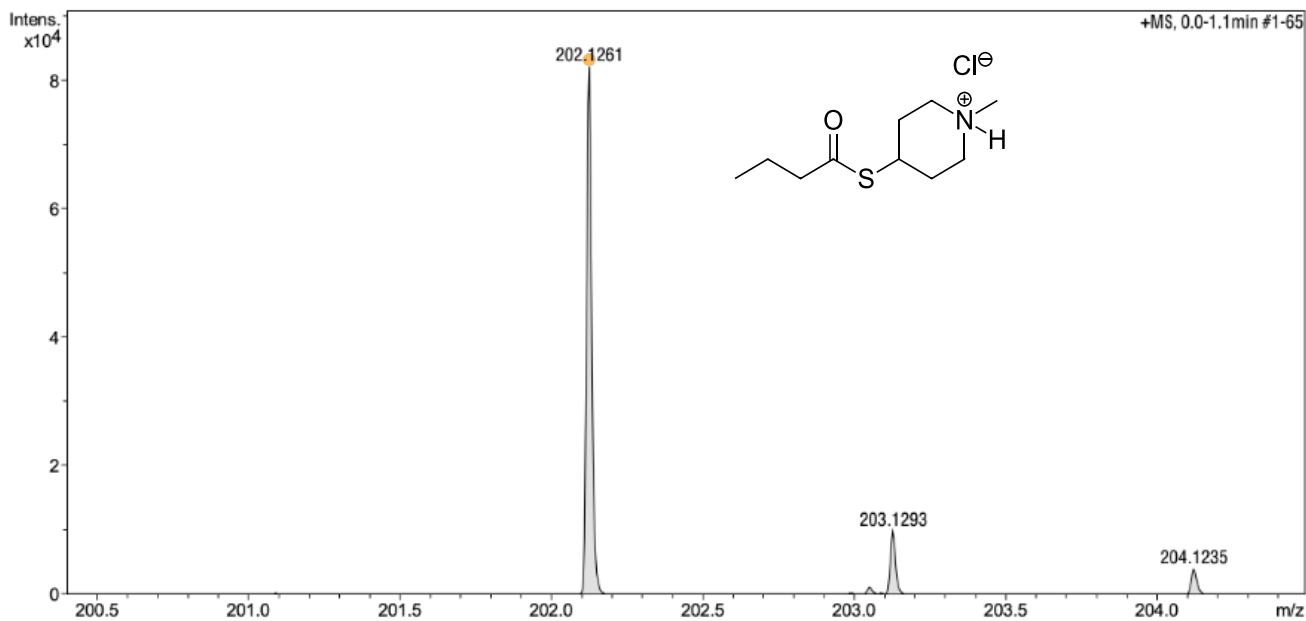

(9) *S*-(1-Methylpiperid-4-yl) Butanethioate Hydrochloride HPLC

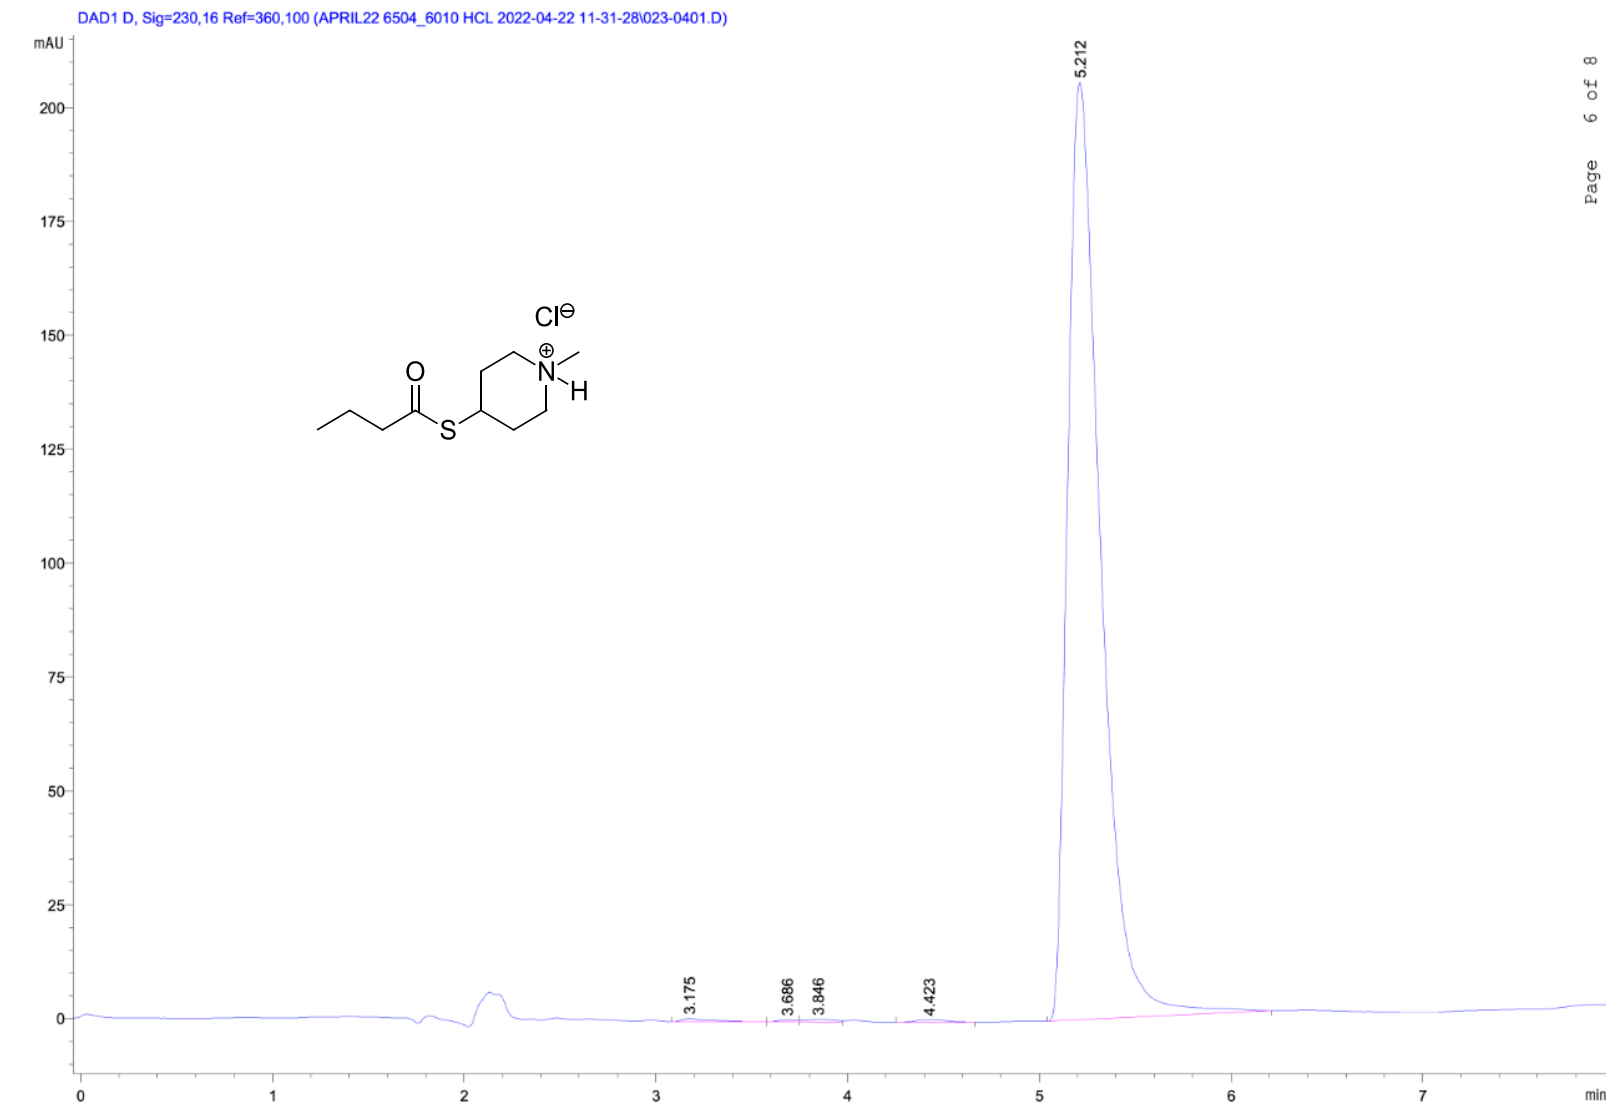

**(10) 4-Butyroxyl-1-methyl-1-piperidinium Chloride**

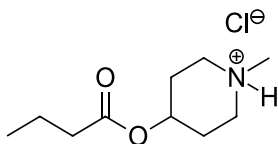

*Synthesis:*

***N*-Methylpiperidin-4-yl Butyrate:** *N*-Methyl-4-piperidinol (0.803 g, 5.18 mmol) was dissolved in anhydrous dichloromethane (10 mL) and stirred under an argon atmosphere. Triethylamine (1.44 mL, 10.4 mmol) was added, and the reaction was cooled to 0°C with an ice bath. Butyryl chloride (0.699 mL, 6.73 mmol) was added dropwise at 0°C. The ice bath was removed after 5 mins, and reaction was stirred for 3 hrs. The reaction was quenched with brine (20 mL), extracted with dichloromethane (3 × 15 mL) and dried over Na<sub>2</sub>SO<sub>3</sub>. The solvent was removed *in vacuo* to produce a yellow oil. The crude mixture was purified by silica gel column chromatography (5% MeOH/DCM) to produce a yellow oil, *N*-methylpiperidin-4-yl butyrate (0.954 g, 99%). The analytical data was similar to previously published data.<sup>[4]</sup>

**4-Butyroxyl-1-methyl-1-piperidinium chloride (9):** To a flask charged with *N*-methylpiperidin-4-yl butyrate (0.48 g, 2.59 mmol) anhydrous diethyl ether was added until complete dissolution (52 mL) under an argon atmosphere. HCl in diethyl ether (1 N - 3.88 mL, 3.88 mmol) was added dropwise and stirred for 1 hr. The solvent was removed *in vacuo* resulting in a white solid. The compound was triturated with diethyl ether (20 mL), and solvent was removed from the solid with a pipet. This process was repeated two more times. The compound was dried *in vacuo* to produce 4-butyl-1-methyl-1-piperidinium chloride (0.583 g, 90%) as a white solid as a pair of isomers (46:54).

*Spectroscopic data:* MP<sub>(diethyl ether)</sub>: 110–113°C; IR(ATR) 2957, 2437, 1724, 1244, 1195, 963 cm<sup>-1</sup>; <sup>1</sup>H NMR (400 MHz, DMSO-*d*6) δ isomer A: 11.12 (br s, 1H), 4.98-4.95 (m, 1H), 3.41-3.77 (m, 2H), 3.10-3.00 (m, 2H), 2.72 (s, 3H), 2.33-2.26 (m, 2H), 2.14-2.06 (m, 2H), 1.92-1.85 (m, 2H), 1.60-1.51 (m, 2H), 0.89-0.86 (m, 3H) isomer B: 11.03 (br s, 1H), 4.84-4.79 (m, 1H), 3.27-3.25 (m, 2H), 3.10-3.00 (m, 2H), 2.68 (s, 3H), 2.33-2.26 (m, 2H), 2.06-2.2.02 (m, 2H), 1.92-1.85 (m, 2H), 1.60-1.51 (m, 2H), 0.89-0.86 (m, 3H); <sup>13</sup>C NMR (100.7 MHz, DMSO-*d*6) δ isomer a: 172.0 (0), 63.5(1), 48.6 (2), 42.3 (3), 35.6 (2), 26.5 (2), 17.9 (2), 13.4 (3), isomer B: 172.2 (0), 67.2 (1), 51.3 (2), 41.8 (3), 35.4 (2), 27.8 (2), 17.9 (2), 13.3 (3); LRMS (ESI<sup>+</sup>): 186.1 (M<sup>+</sup>); HRMS (ESI<sup>+</sup>): calculated for C<sub>10</sub>H<sub>20</sub>NO<sub>2</sub><sup>+</sup>: 186.1488 amu; found for C<sub>10</sub>H<sub>20</sub>NO<sub>2</sub><sup>+</sup>: 186.1492 amu; HPLC purity at 210 nm (75% CH<sub>3</sub>CN : 10% CH<sub>3</sub>OH : 15% aqueous triethylamine [0.1% triethylamine in H<sub>2</sub>O], retention time 4.406 mins): >99%.



(10) 4-Butyryloxy-1-methyl-1-piperidinium Chloride IR(ATR)

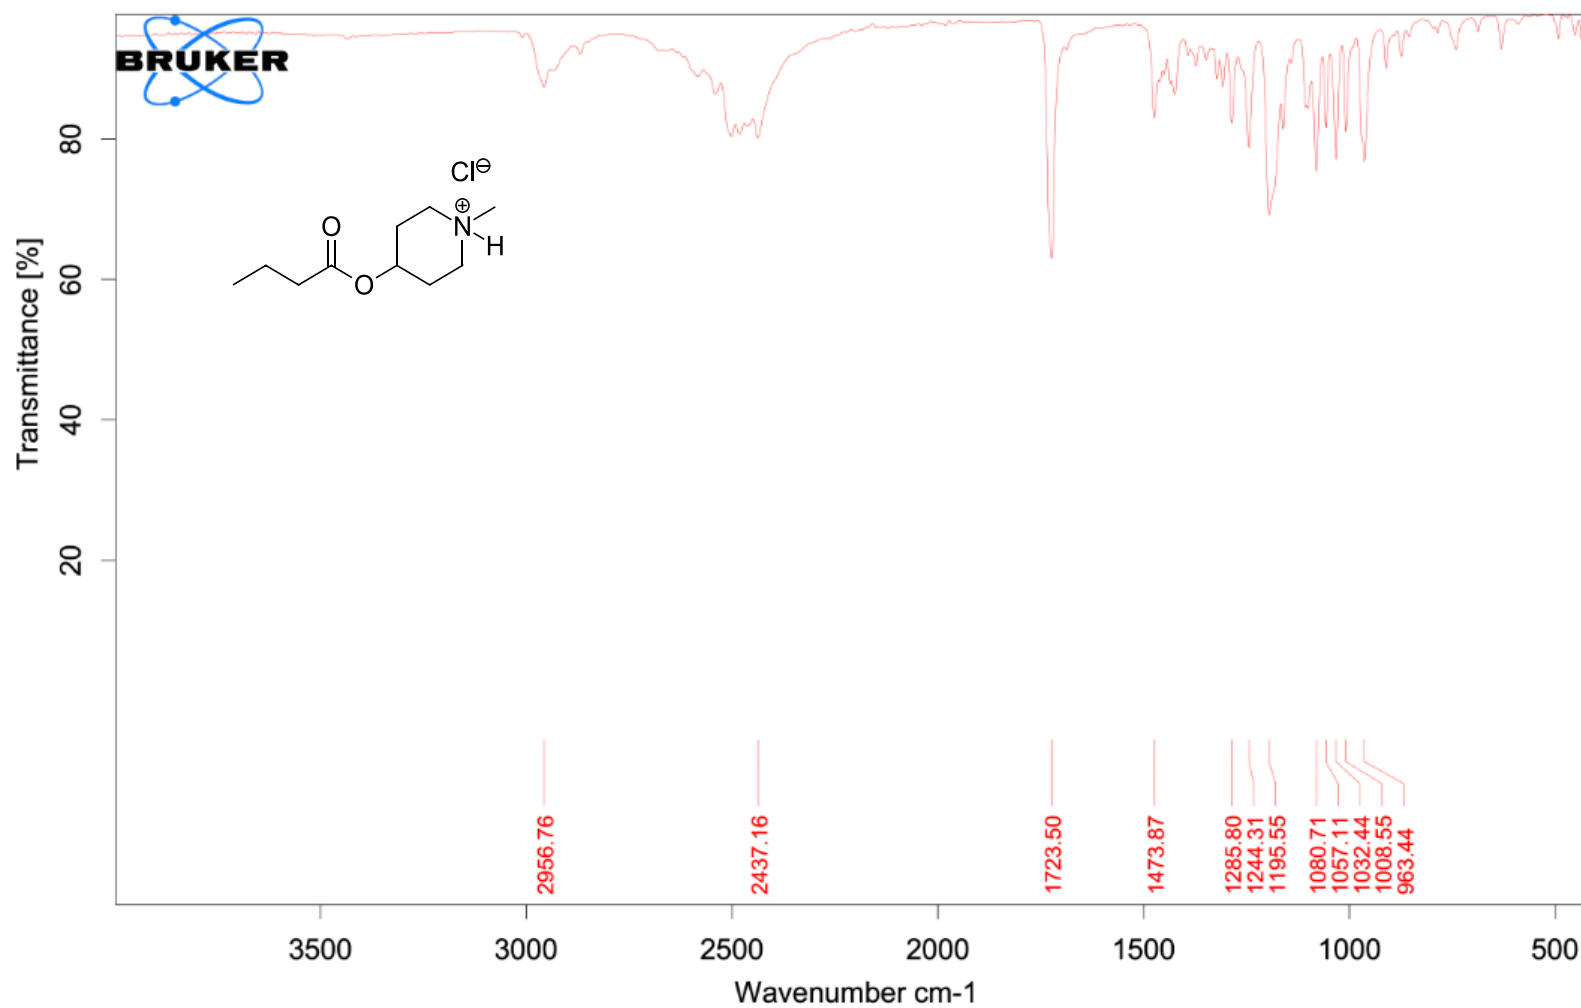

(10) 4-Butyroxyl-1-methyl-1-piperidinium Chloride <sup>1</sup>H NMR 400 MHz (DMSO-d<sub>6</sub>)

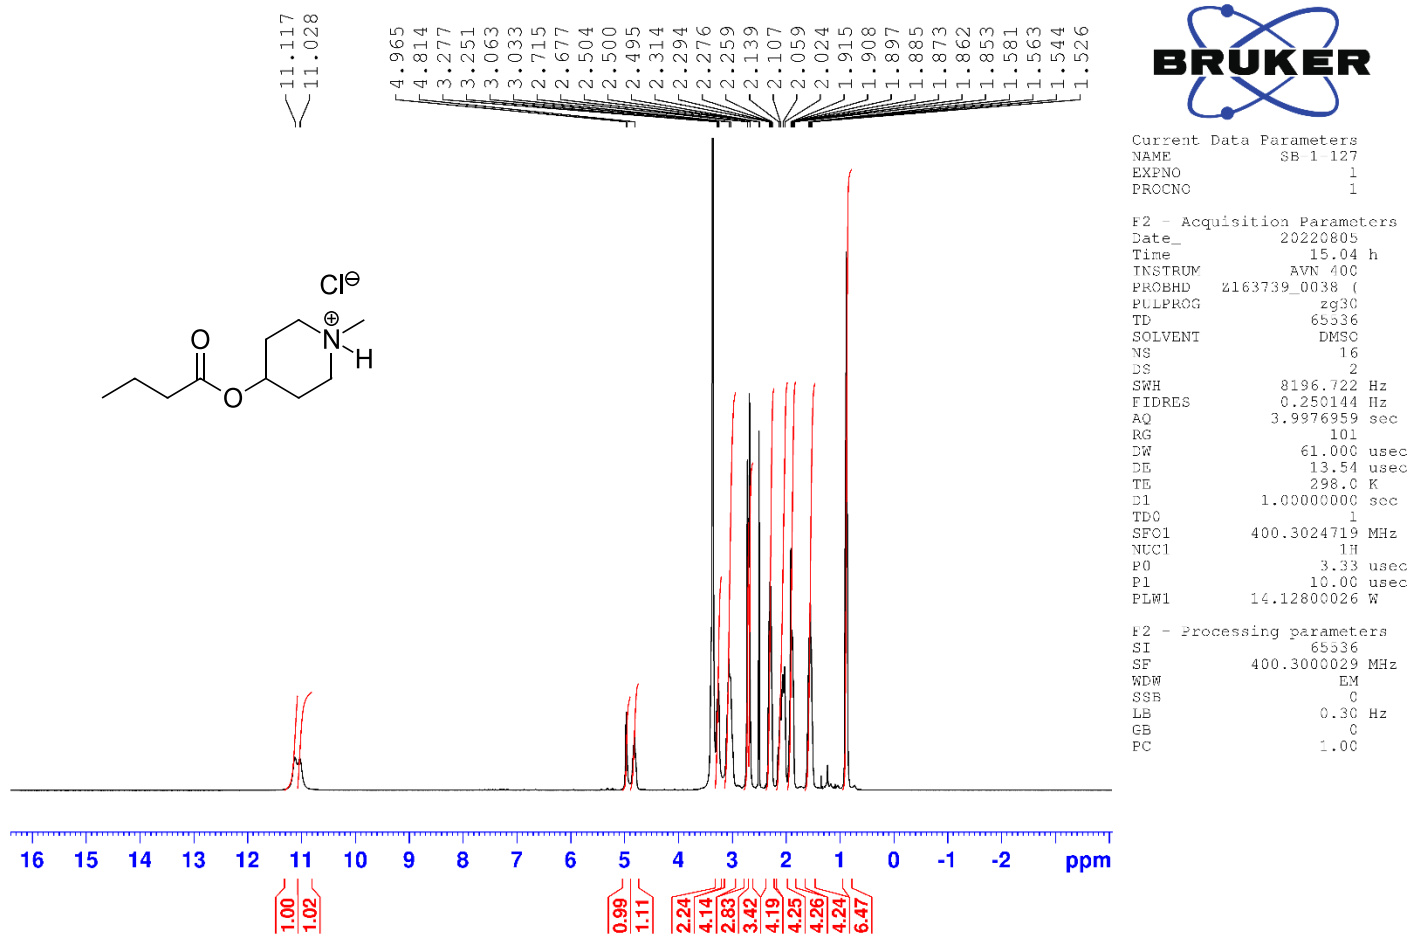

(10) 4-Butyroyloxy-1-methyl-1-piperidinium Chloride <sup>13</sup>C NMR 100 MHz (DMSO-d<sub>6</sub>)

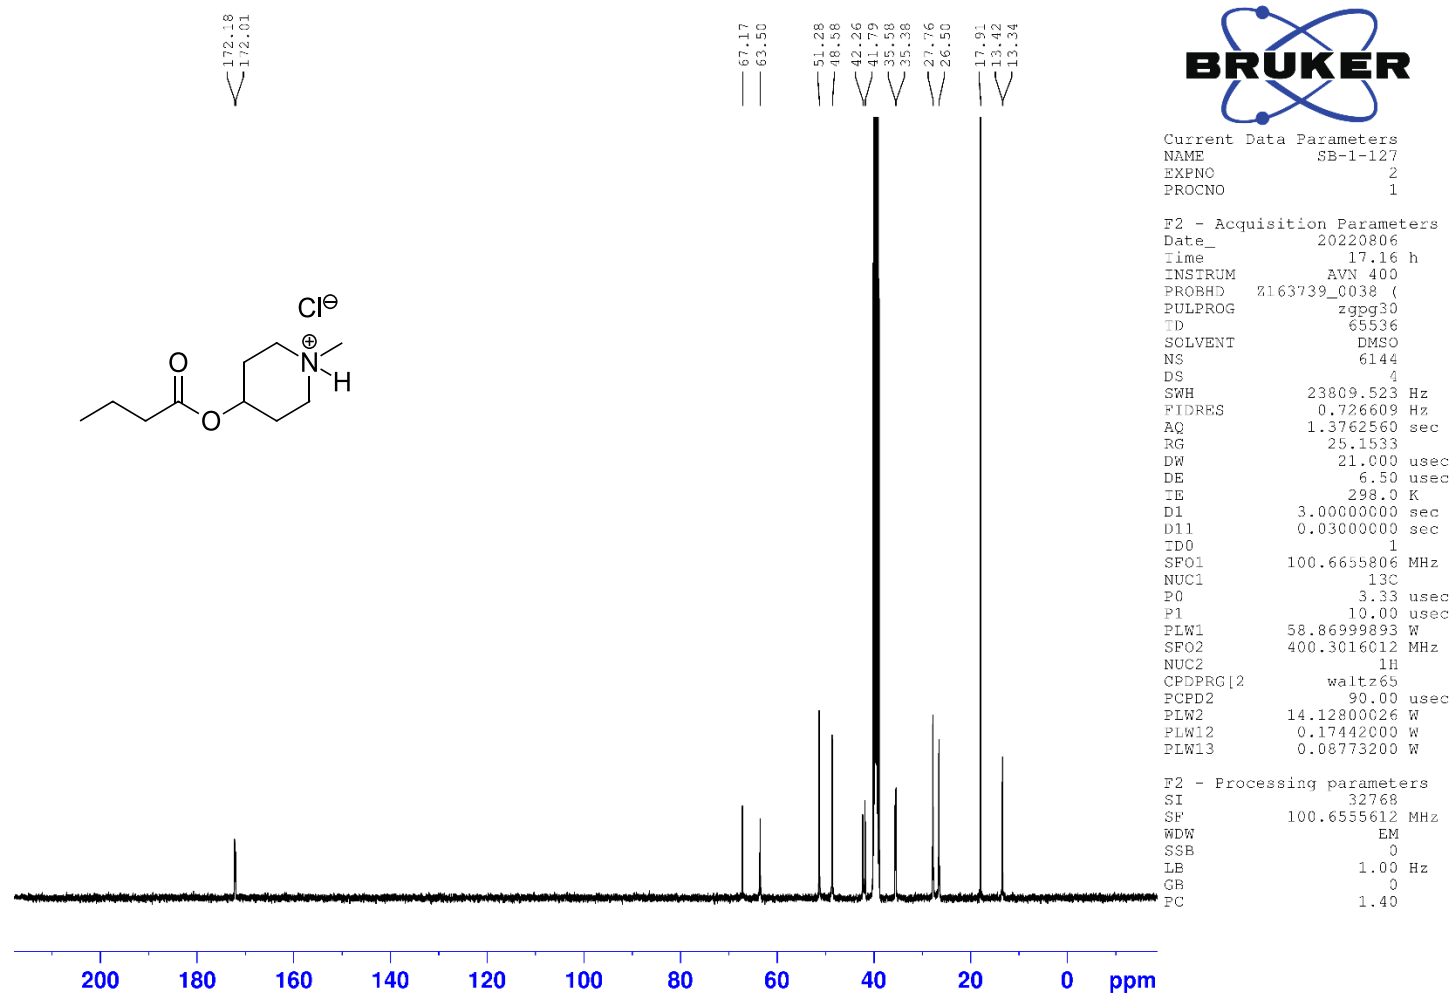

(10) 4-Butyroxyl-1-methyl-1-piperidinium Chloride High Resolution Mass Spectrum (ESI, positive mode)

### Mass Spectrum SmartFormula Report

|                      |                                    |                  |                     |               |
|----------------------|------------------------------------|------------------|---------------------|---------------|
| <b>Analysis Info</b> |                                    | Acquisition Date | 7/7/2022 9:25:32 AM |               |
| Analysis Name        | D:\Data\Xiao\July 07 2022\000006.d | Operator         | x                   |               |
| Method               | Xiao all 1.m                       | Instrument       | compact             | 8255754.20059 |
| Sample Name          | TRV 6013 HCl                       |                  |                     |               |
| Comment              |                                    |                  |                     |               |

|                              |            |                      |          |                  |           |
|------------------------------|------------|----------------------|----------|------------------|-----------|
| <b>Acquisition Parameter</b> |            |                      |          |                  |           |
| Source Type                  | ESI        | Ion Polarity         | Positive | Set Nebulizer    | 0.5 Bar   |
| Focus                        | Not active | Set Capillary        | 3500 V   | Set Dry Heater   | 180 °C    |
| Scan Begin                   | 50 m/z     | Set End Plate Offset | -500 V   | Set Dry Gas      | 4.0 l/min |
| Scan End                     | 1500 m/z   | Set Charging Voltage | 2000 V   | Set Divert Valve | Source    |
|                              |            | Set Corona           | 0 nA     | Set APCI Heater  | 0 °C      |

| Meas. m/z | Ion Formula                                     | m/z      | err [ppm] |
|-----------|-------------------------------------------------|----------|-----------|
| 186.1492  | C <sub>10</sub> H <sub>20</sub> NO <sub>2</sub> | 186.1489 | -2.0      |

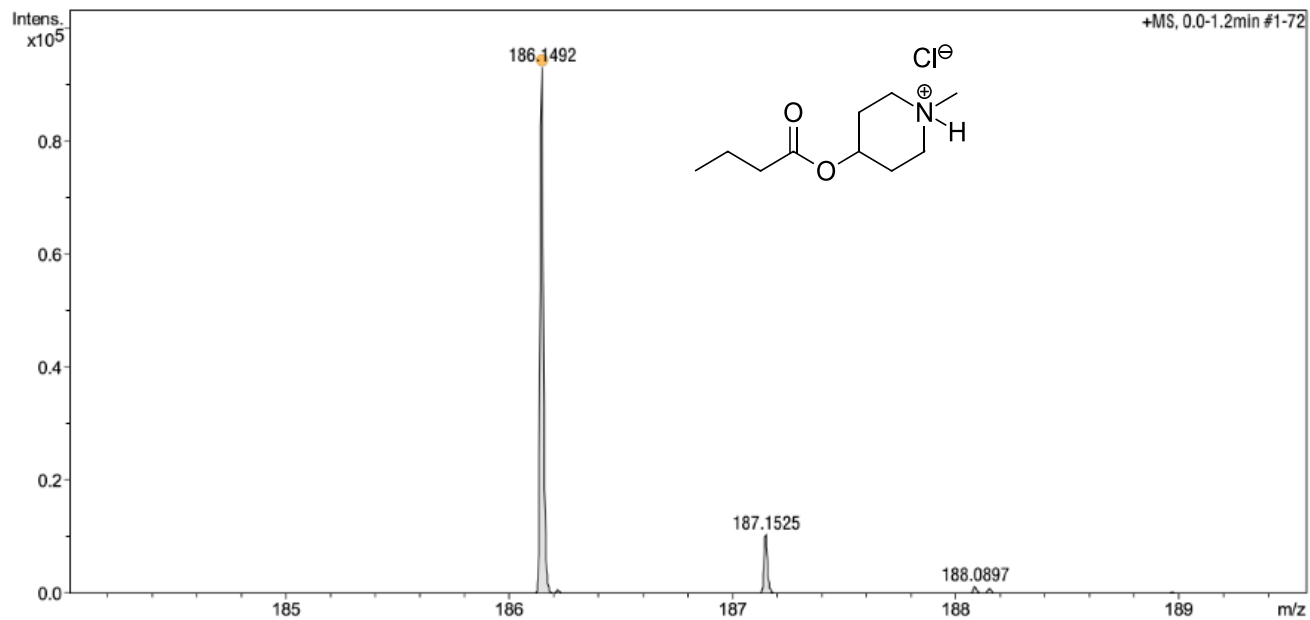

July 07 2022\000006.d

Bruker Compass DataAnalysis 4.3

printed: 7/7/2022 9:28:17 AM

by: x

Page 1 of 1

(10) 4-Butyryloxy-1-methyl-1-piperidinium Chloride HPLC. Note: Noise from the injection has a retention time from 1.6 min until 2.5 min. The compound of interest has a retention time of 4.406 min.

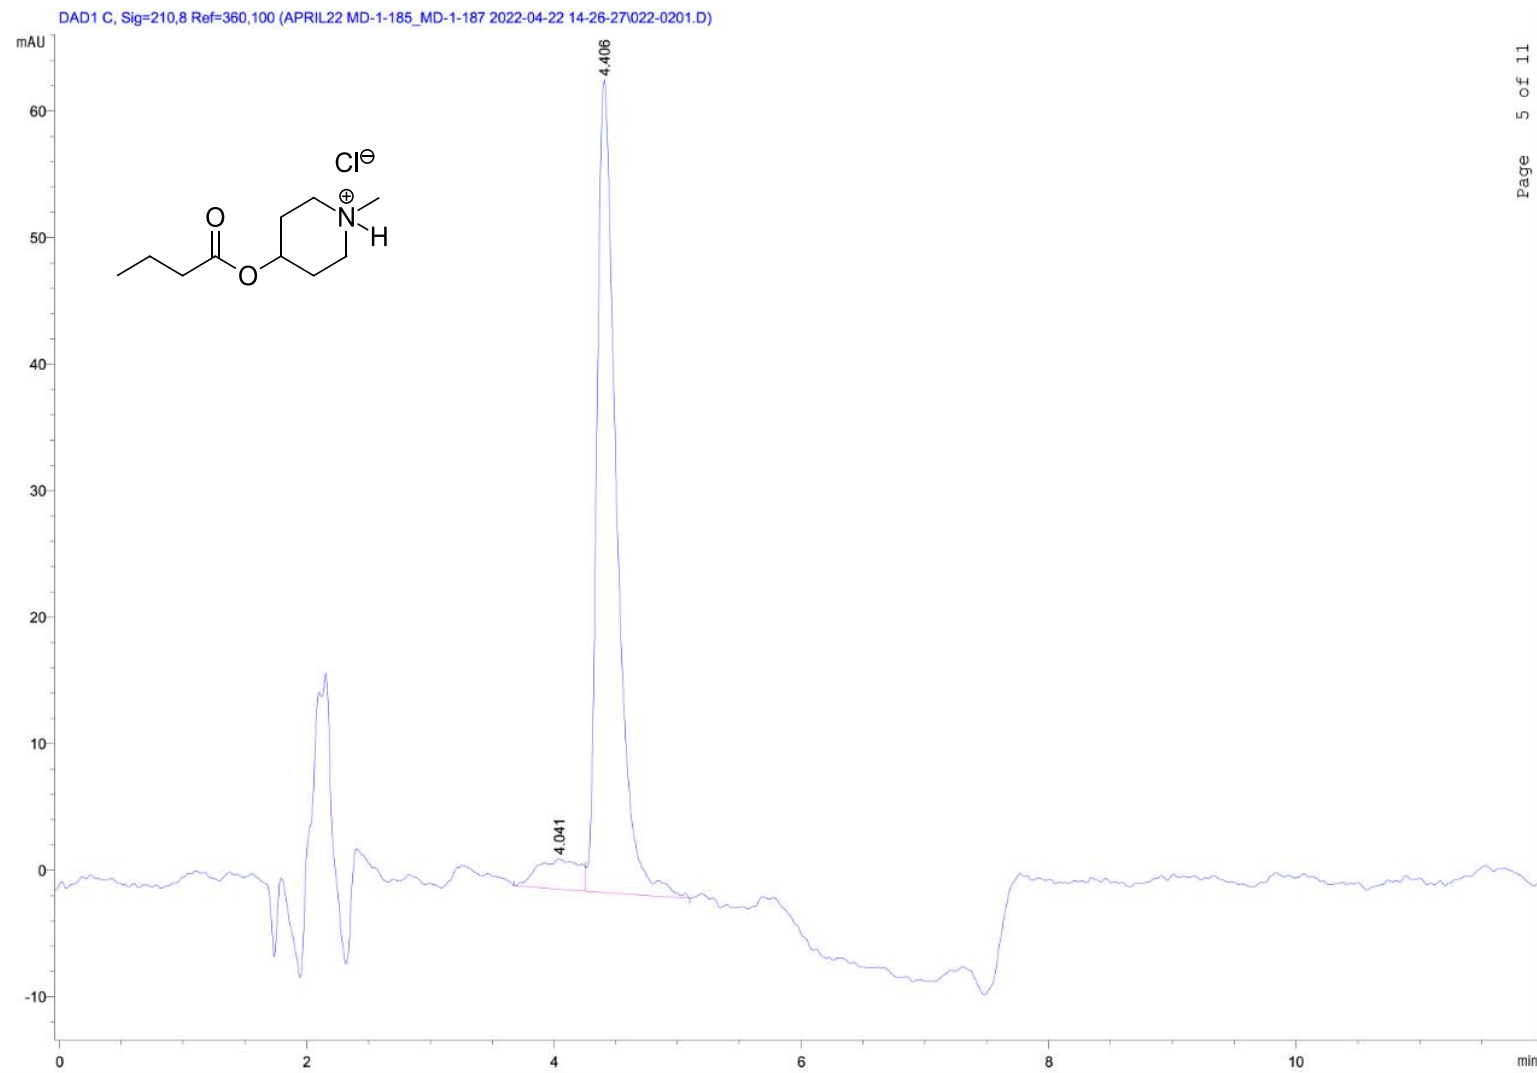

## *Aryl N-Methylpiperidinyl Derivatives*

### **(11)** (1-Methylpiperidin-4-yl) *p*-Iodobenzenecarbothioate Hydrochloride

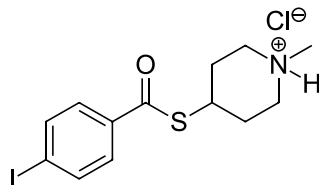

**Synthesis: (1-Methylpiperidin-4-yl) *p*-iodobenzenecarbothioate:** *N*-methyl-4-piperidinethiol (0.538 g, 4.1 mmol) and triethylamine (0.90 mL, 6.2 mmol) were dissolved in anhydrous dichloromethane (10 mL) under an argon atmosphere. 4-Iodobenzoyl chloride (1.31 g, 4.9 mmol) was added at 0°C. The ice bath was removed after 5 mins and the reaction was stirred for 16 hrs at room temperature. The reaction was quenched with brine (20 mL), extracted with dichloromethane (3 × 15 mL), and the combined organic layers were dried over Na<sub>2</sub>SO<sub>3</sub>. After gravity filtration, the solvent was removed *in vacuo* to produce 1.49 g of a brown solid. The crude mixture was purified by silica gel column chromatography (step gradient: 5% MeOH/DCM to 10 % MeOH/DCM) to produce a white solid, (1-methylpiperidin-4-yl) *p*-iodobenzenecarbothioate (0.644 g, 43% yield). The analytical data was similar to previously published data.<sup>[1]</sup>

### **(1-Methylpiperidin-4-yl) *p*-iodobenzenecarbothioate hydrochloride (12):**

(1-methylpiperidin-4-yl) *p*-iodobenzenecarbothioate (0.47 g, 1.3 mmol) was dissolved in anhydrous diethyl ether (86 mL) under an argon atmosphere. HCl in diethyl ether (1 N solution, 2.0 mL, 2.0 mmol) was added dropwise resulting in the immediate formation of a white precipitate. The reaction was stirred for an additional 60 mins. The white solid was collected *via*

suction filtration, washed with Et<sub>2</sub>O (2 × 30 mL), to afford (1-methylpiperidin-4-yl) *p*-iodobenzenecarbothioate hydrochloride, (0.450 g, 87% yield) as a white solid.

*Spectroscopic data:* MP<sub>(diethyl ether)</sub>: >250°C; IR(ATR) 3083, 3068, 3038, 2975, 2951, 2436, 2393, 1655, 1578, 1465, 918; <sup>1</sup>H NMR (400 MHz, CD<sub>3</sub>OD) δ 7.93-7.91 (m, 2H), 7.70-7.68 (m, 2H), 3.94-3.80 (m, 1H), 3.62-3.47 (m, 2H), 3.34-3.18 (m, 2H), 2.90 (s, 3H), 2.34-2.31 (m, 2H), 2.09-1.98 (m, 2H); <sup>13</sup>C NMR (100.7 MHz, CD<sub>3</sub>OD) δ 191.4, 139.5, 137.3, 129.5, 102.5, 55.4, 43.8, 37.9, 30.6; LRMS (ESI<sup>+</sup>): 362.0 (M<sup>+</sup>); HRMS (ESI<sup>+</sup>): calculated for C<sub>13</sub>H<sub>17</sub>INOS<sup>+</sup>: 362.0070 amu; found for C<sub>13</sub>H<sub>17</sub>INOS<sup>+</sup>: 362.0073 amu; HPLC purity at 254nm (75% CH<sub>3</sub>CN : 10% CH<sub>3</sub>OH : 15% aqueous triethylamine [0.1% triethylamine in H<sub>2</sub>O], retention time 11.364 mins): 98.2 %.

(11) (1-Methylpiperidin-4-yl) *p*-Iodobenzenecarbothioate Hydrochloride IR(ATR)

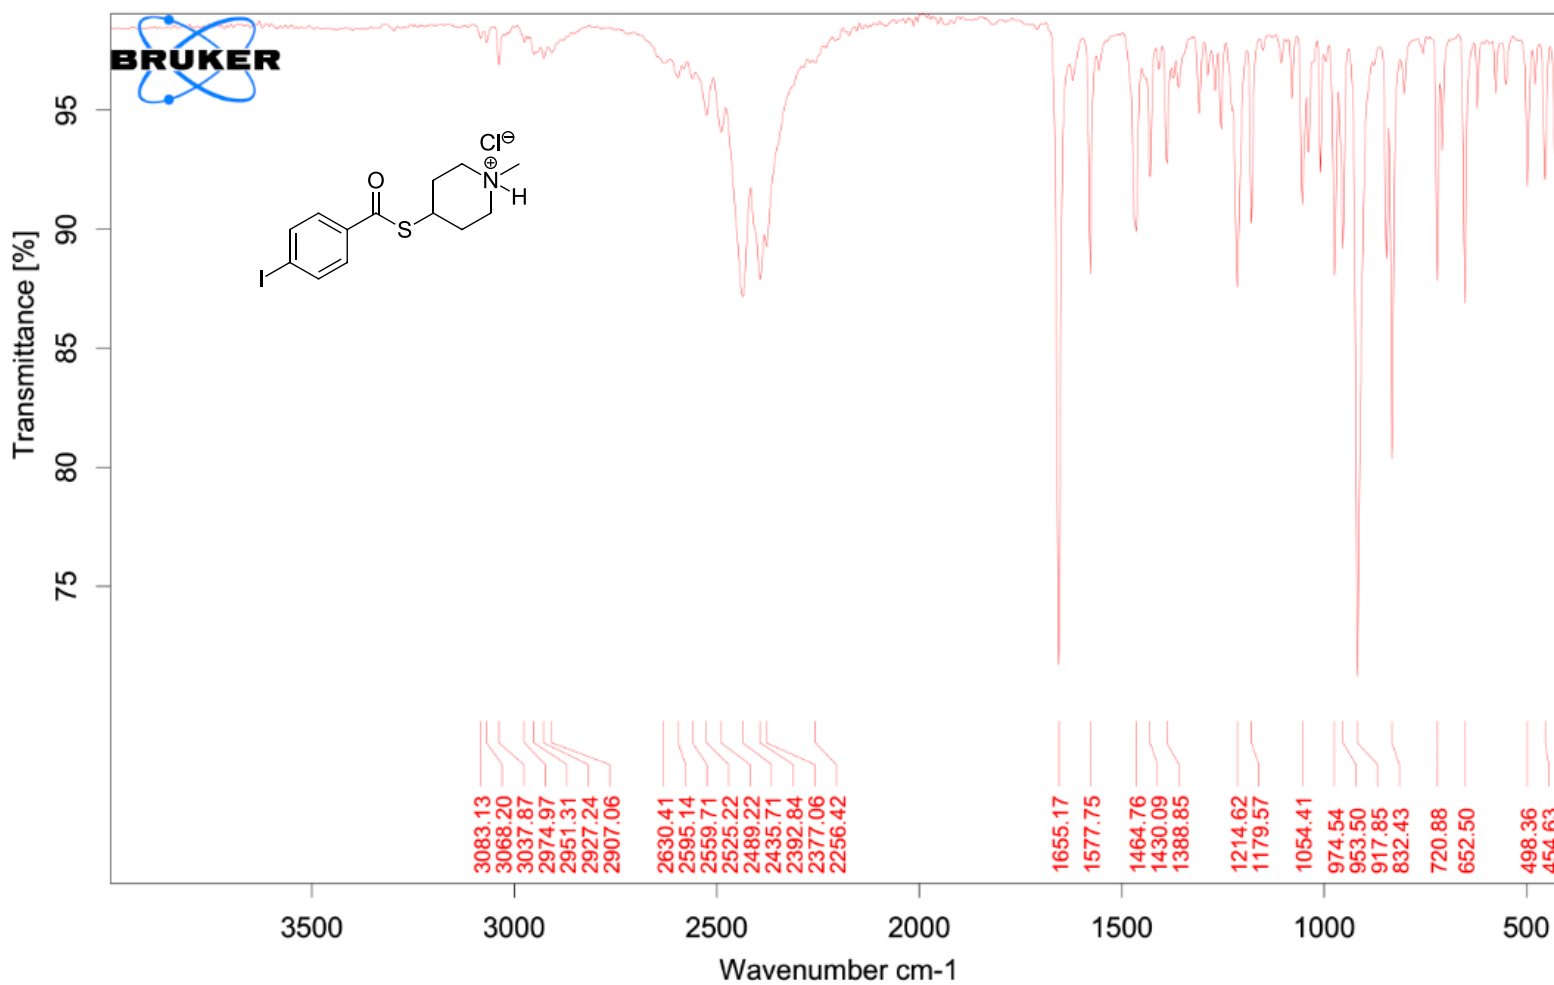



(11) (1-Methylpiperidin-4-yl) *p*-Iodobenzenecarbothioate Hydrochloride <sup>1</sup>H NMR 400 MHz (CD<sub>3</sub>OD-*d*<sub>4</sub>)

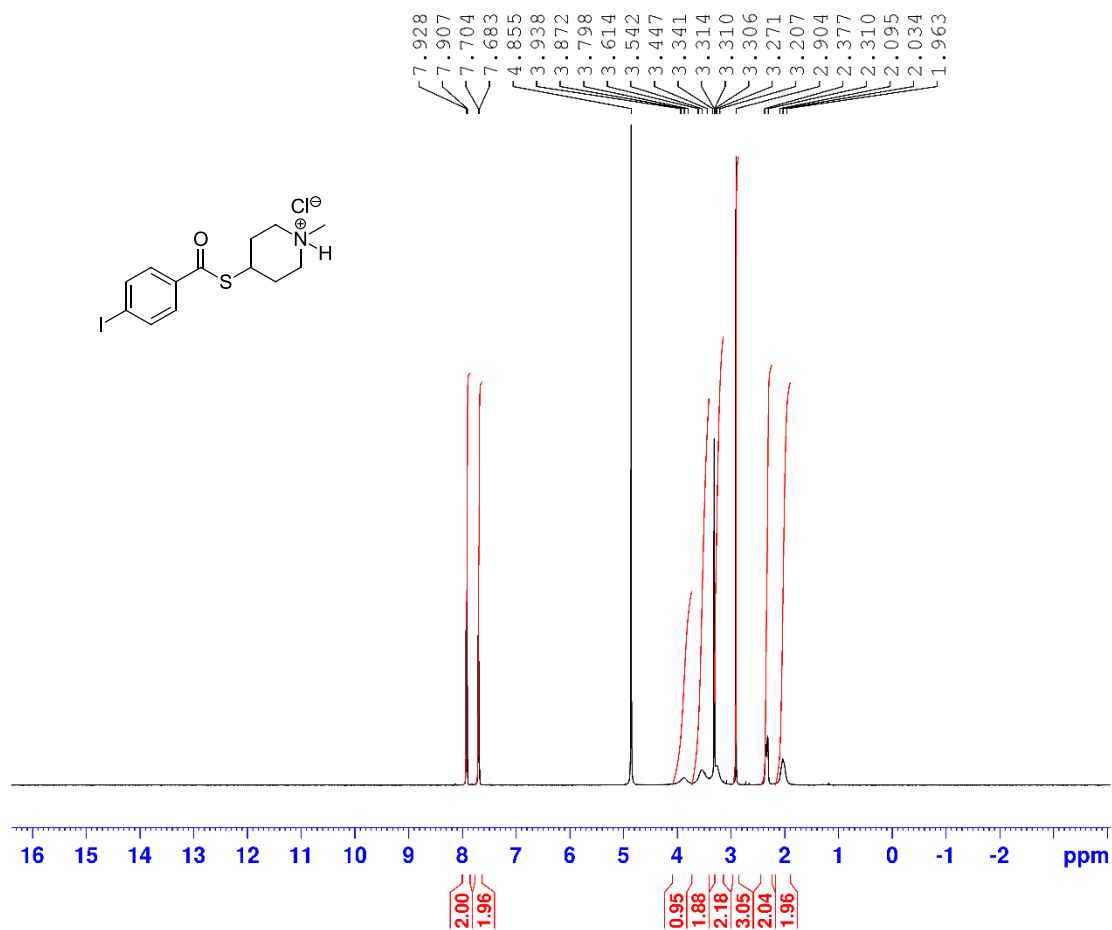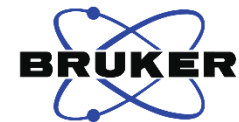

Current Data Parameters  
NAME SS-1-121  
EXPNO 12  
PROCNO 1

F2 - Acquisition Parameters  
Date\_ 20220721  
Time 12.44 h  
INSTRUM AVN 400  
PROBHD Z163739\_0038 ( )  
PULPROG zg30  
TD 65536  
SOLVENT MeOD  
NS 16  
DS 2  
SWH 8196.722 Hz  
FIDRES 0.230144 Hz  
AQ 3.9976959 sec  
RG 101  
DW 61.000 usec  
DE 13.54 usec  
TE 298.0 K  
D1 1.00000000 sec  
TD0 1  
SFO1 400.3024719 MHz  
NUC1 1H  
P0 3.33 usec  
P1 10.00 usec  
PTW1 14.12800076 W

F2 - Processing parameters  
SI 65536  
SF 400.3000077 MHz  
WDW EM  
SSB 0  
LB 0.30 Hz  
GB 0  
PC 1.00

(11) (1-Methylpiperidin-4-yl) *p*-Iodobenzenecarbothioate Hydrochloride <sup>13</sup>C NMR 100 MHz (CD<sub>3</sub>OD-*d*4)

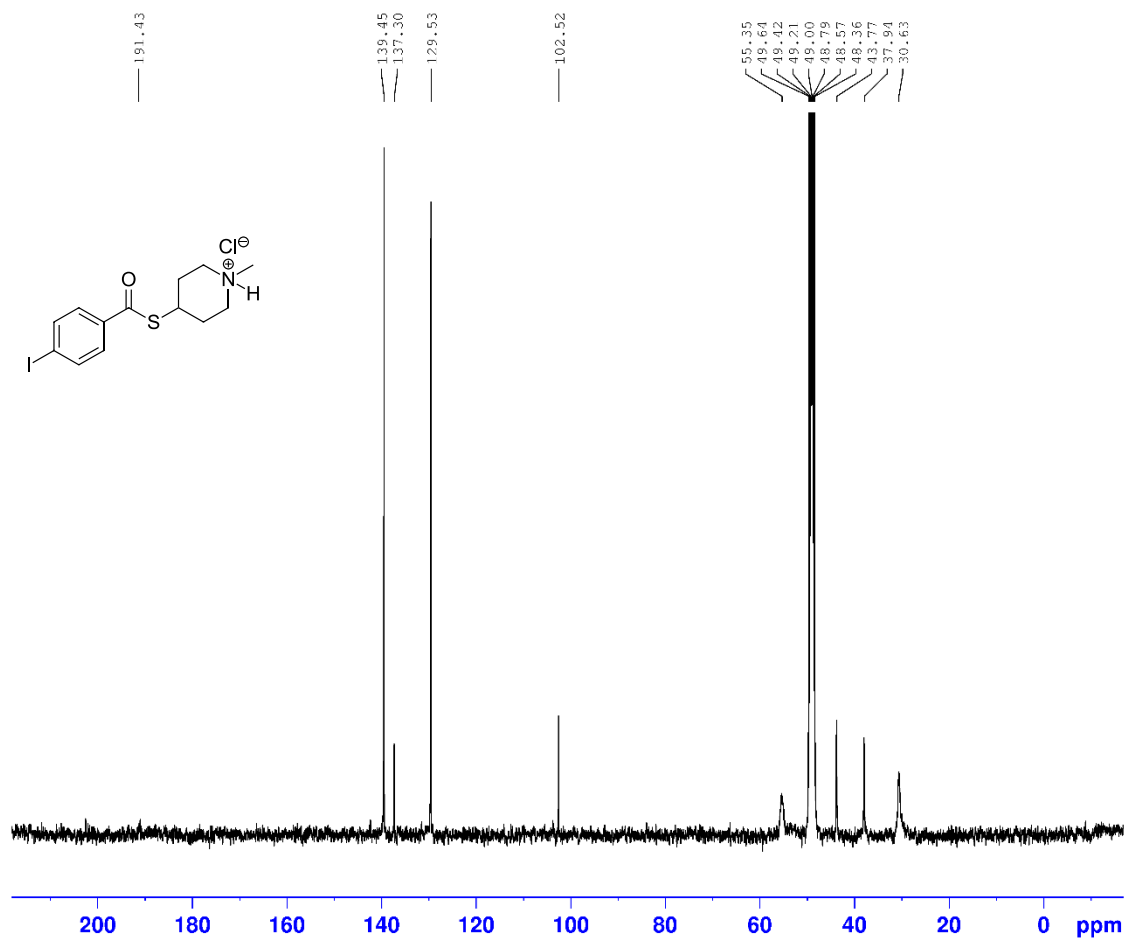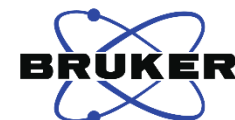

```

Current Data Parameters
NAME          SB-1-121
%XPRO        6
PROCNO       1

F2 - Acquisition Parameters
Date_        20220719
Time         23.05 h
INSTRUM      AVN 400
PROBHD       2163739_0038 (
PULPROG      udefc
TD           21424
SOLVENT      MeOD
NS           3072
DS           8
SWH          23809.523 Hz
FIDRES       2.222696 Hz
AQ           0.4499040 sec
RG           30.8062
DN           21.900 usec
DE           6.50 usec
TE           298.0 K
D1           4.0000000 sec
D12          0.0000200 sec
D20          20.0000000 sec
TD0          1
SFO1         100.665806 MHz
NUC1         13C
P1           10.00 usec
P13          2000.00 usec
P26          500.00 usec
PLW1         58.86999893 W
SFOAL5[5]    Crp60comp.4
SFOAL5       0.500
SFOFFS5      0 Hz
SFW5         8.99470043 W
SFOAL6[6]    Crp60,0.5,20.1
SFOAL6       0.500
SFOFFS6      0 Hz
SFW6         8.99470043 W
SFO2         400.3016012 MHz
NUC2         1H
CPDPRG12     waltz65
PCPD2        90.00 usec
PLW2         14.12800026 W
PLW12        0.17442000 W

F2 - Processing parameters
SI           131072
SF           100.6553743 MHz
WDW          EM
SSB          0
LB           4.00 Hz
GB           0
PC           1.40
    
```

(11) (1-Methylpiperidin-4-yl) *p*-Iodobenzenecarbothioate Hydrochloride High Resolution Mass Spectrum (ESI, positive mode)

Generic Display Report

Analysis Info

Analysis Name D:\Data\Xiao\July 21 2022\000002.d  
Method Xiao all 1.m  
Sample Name TRV 6007 HCl  
Comment

Acquisition Date 7/21/2022 10:12:51 AM

Operator x  
Instrument compact

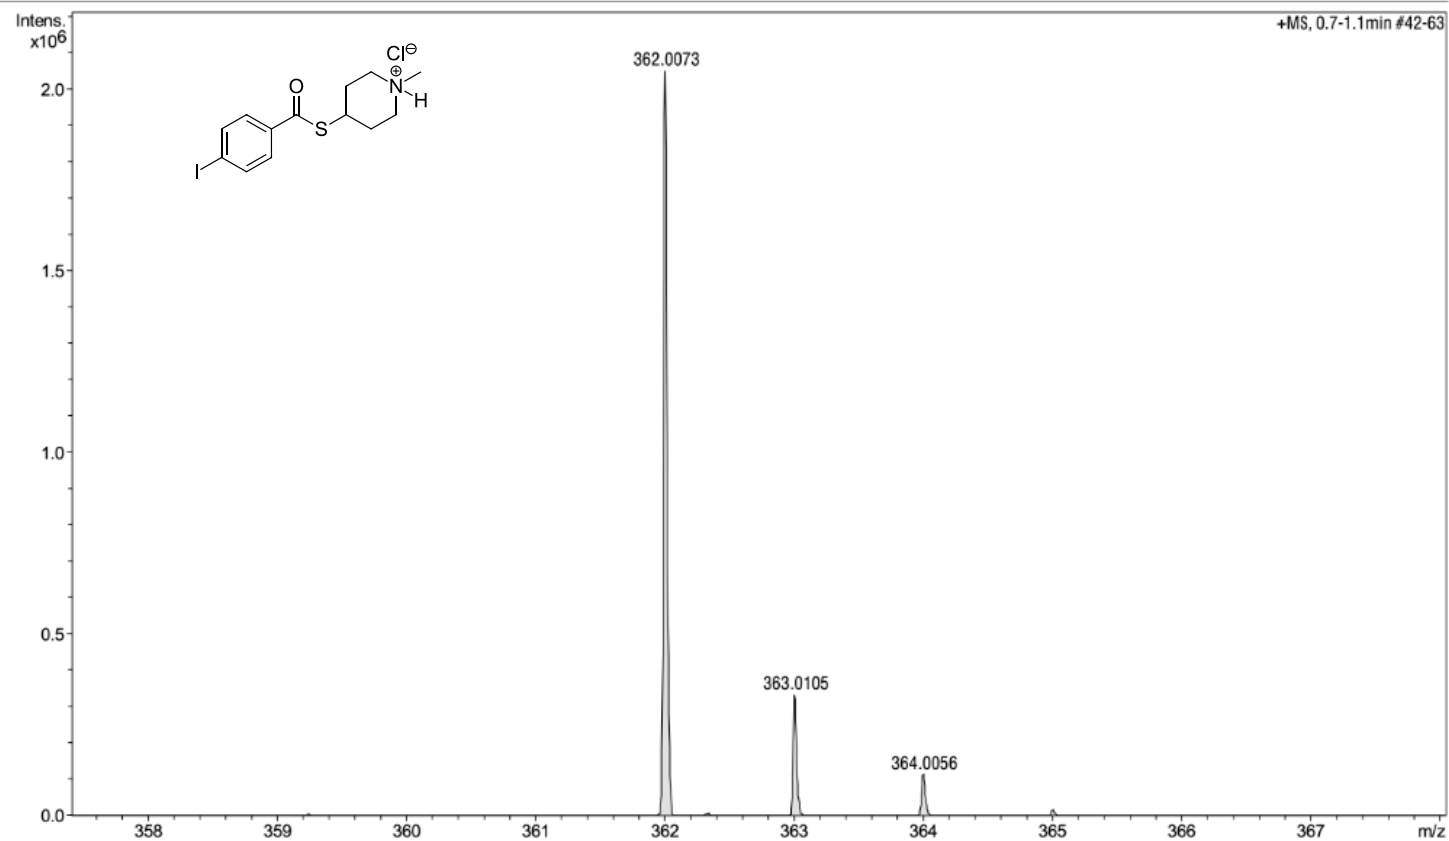

(11) (1-Methylpiperidin-4-yl) *p*-Iodobenzenecarbothioate Hydrochloride HPLC

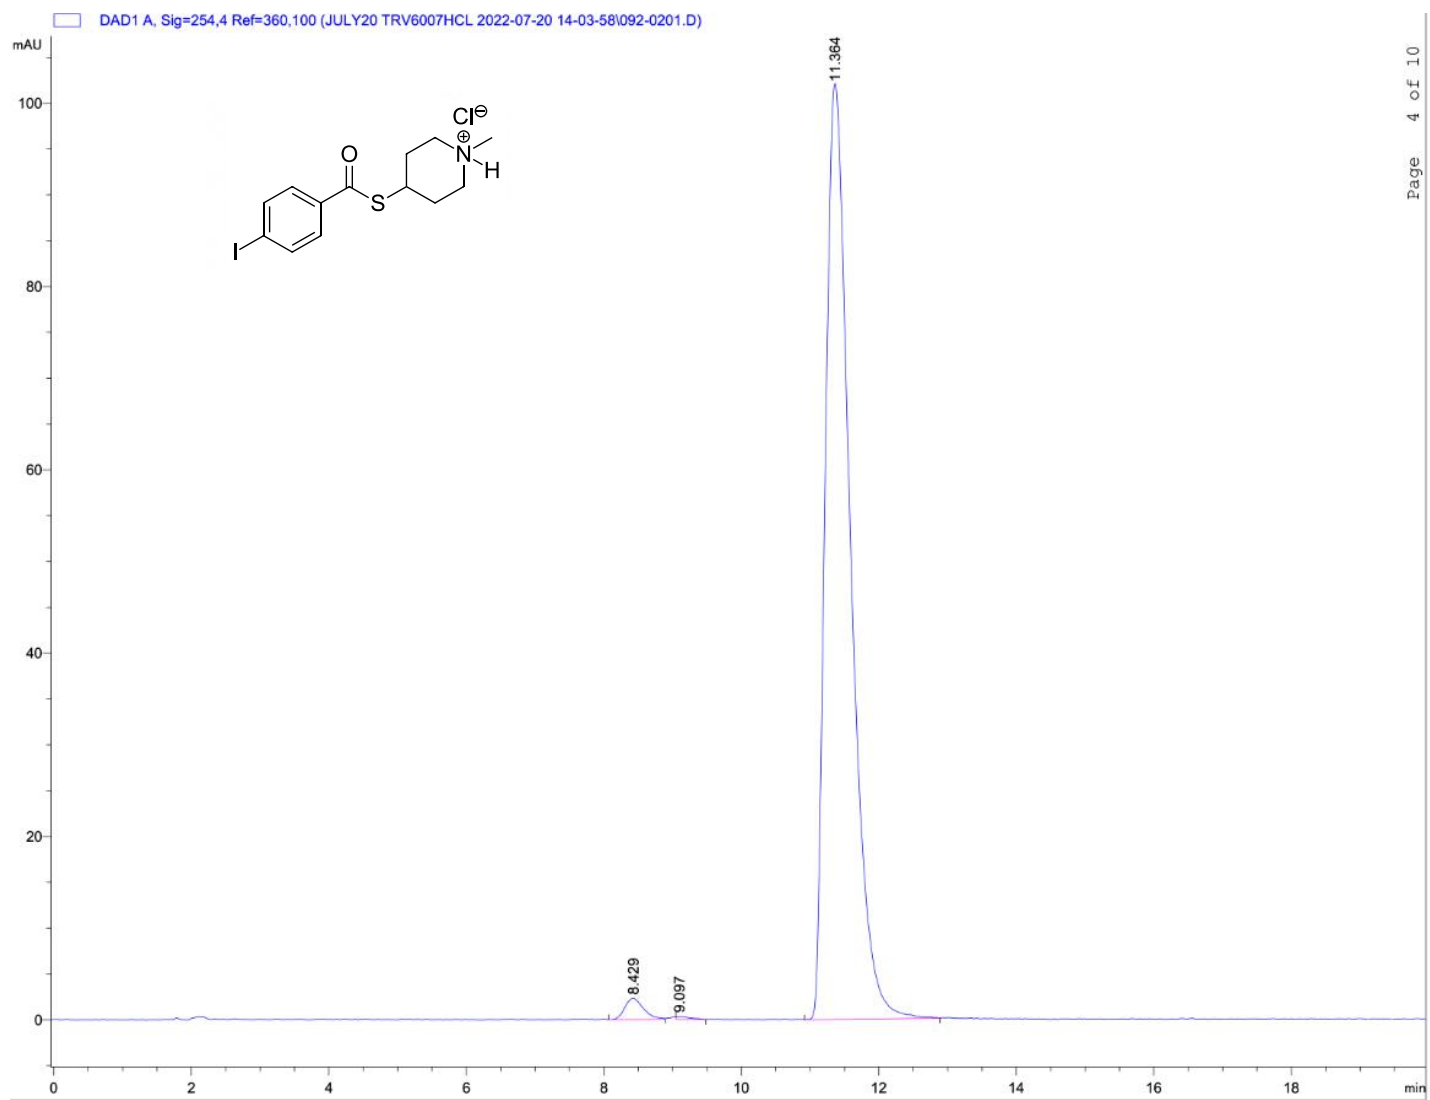

(12) 4-(*p*-Iodobenzoyloxy)-1-methyl-1-piperidinium Chloride

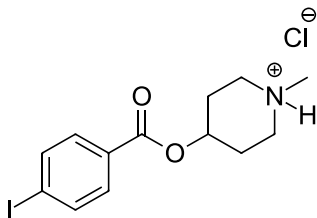

*Synthesis: 1-Methylpiperidin-4-yl 4-iodobenzoate:* A sample from a previous study was obtained from our lab and the analytical data was similar to previously published data.<sup>[1]</sup>

**4-(*p*-Iodobenzoyloxy)-1-methyl-1-piperidinium chloride (11):** *N*-methylpiperidin-4-yl 4-iodobenzoate (0.4032 g, 1.2 mmol) was dissolved in anhydrous diethyl ether (39 mL) under an argon atmosphere. HCl in diethyl ether (1 N solution, 1.8 mL, 1.8 mmol) was added dropwise resulting in the immediate formation of a white precipitate. The reaction was stirred for an additional 60 mins. The precipitate was collected via suction filtration, washed with Et<sub>2</sub>O (2 x 15 mL), to afford 4-(*p*-iodobenzoyloxy)-1-methyl-1-piperidinium chloride (0.200 mg, 44 % yield) as a white solid and a mixture of isomers (59:41).

*Spectroscopic data:* MP<sub>(diethyl ether)</sub>: >250°C (Lit MP<sub>(acetone/EtOH/H<sub>2</sub>O)</sub>: 267-268.5°C);<sup>[5]</sup> IR (ATR) 3014, 3003, 2944, 2612, 2512, 1721, 1586, 1272, 1118, 1008, 748; <sup>1</sup>H NMR (400 MHz, DMSO-*d*<sub>6</sub>) δ isomer A: 10.88 (br s, 1H), 7.94-7.92 (m, 2H), 7.73-7.71 (m, 2H), 5.11-5.02 (m, 1H), 3.33-3.30 (m, 2H), 3.17-3.07 (m, 2H), 2.73 (s, 3H), 2.21-2.15 (m, 2H), 2.06-2.00 (m, 2H), isomer B: 10.69 (br s, 1H), 7.94-7.92 (m, 2H), 7.86-7.84 (m, 2H), 5.23 (app br s, 1H), 3.47-3.44 (m, 2H), 3.25-3.17 (m, 2H), 2.79 (s, 3H), 2.21-2.15 (m, 2H), 2.06-2.00 (m, 2H); <sup>13</sup>C NMR (100.7 MHz, DMSO-*d*<sub>6</sub>) δ isomer A: 164.7 (0), 137.8 (1), 131.0 (1), 128.9 (0), 102.14 (0), 68.4 (1), 51.2 (2), 41.8 (3), 27.7 (2), isomer B: 164.6 (0), 137.6 (1), 131.3 (1), 129.2 (0), 102.07 (0), 64.8 (1), 48.7 (2), 42.4 (3), 26.7 (2); LRMS (ESI<sup>+</sup>): 346.0 (M<sup>+</sup>); HRMS (ESI<sup>+</sup>): calculated for C<sub>13</sub>H<sub>17</sub>INO<sub>2</sub><sup>+</sup>:

346.0298; found for  $C_{13}H_{17}INO_2^+$ : 346.0296; HPLC purity at 254nm (75%  $CH_3CN$  : 10%  $CH_3OH$  : 15% aqueous triethylamine [0.1% triethylamine in  $H_2O$ ], retention time 7.883 mins): 99.3%.

(12) 4-(*p*-Iodobenzoyloxy)-1-methyl-1-piperidinium Chloride IR(ATR)

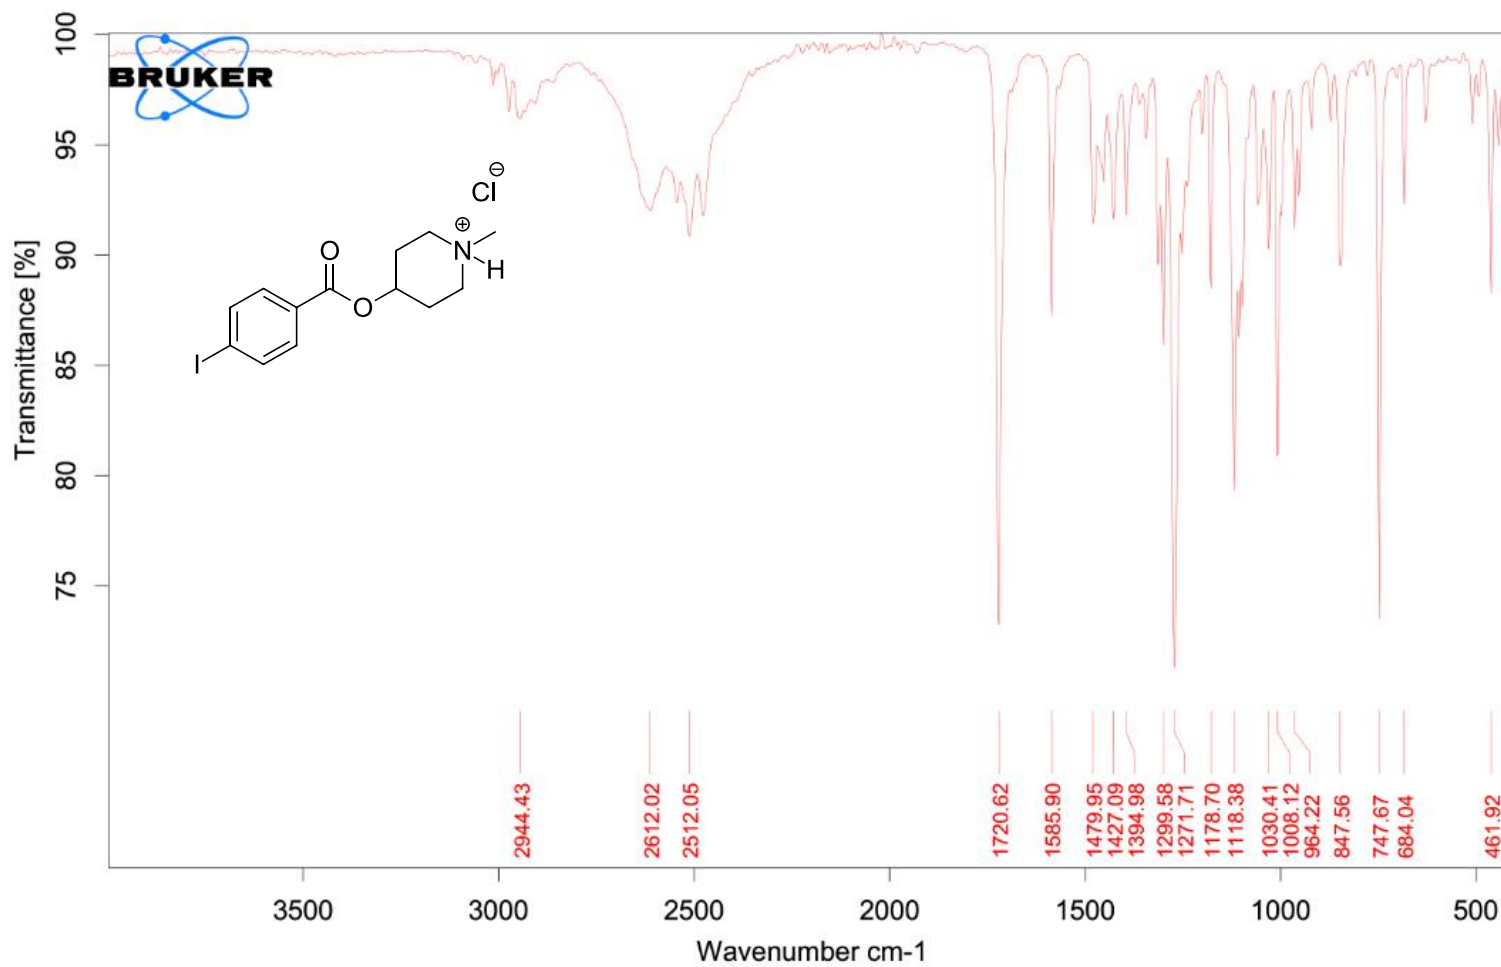

C:\Users\Administrator\Documents\Bruker\OPUS\_7.5.18\DATA\MEAS\TRV6001 HCl.0

TRV6001 HCl

Instrument type and / or accessory

7/4/2022

(12) 4-(*p*-Iodobenzoyloxy)-1-methyl-1-piperidinium Chloride <sup>1</sup>H NMR 400 MHz (DMSO-*d*<sub>6</sub>)

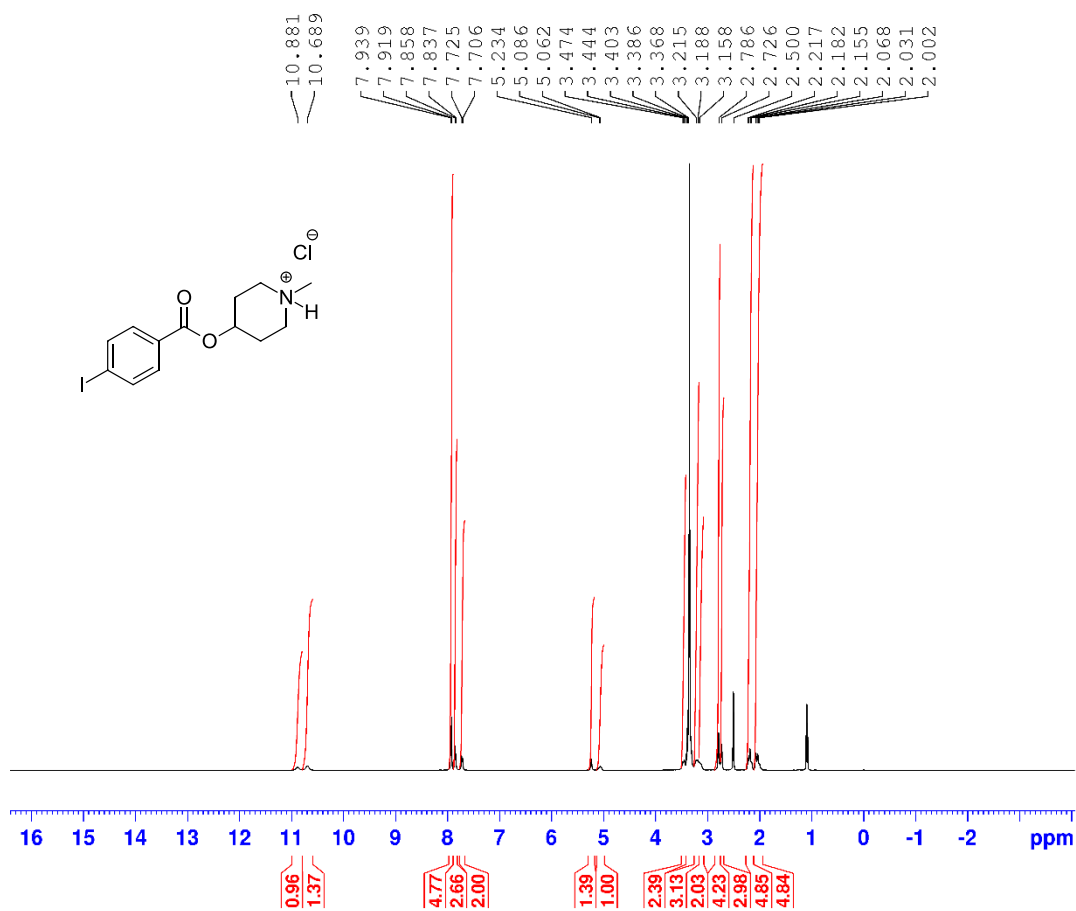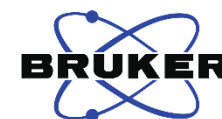

```

Current Data Parameters
NAME          SB-1-105
EXPNO         1
PROCNO        1

F2 - Acquisition Parameters
Date_         20220411
Time          15.59 h
INSTRUM       AVN 400
PROBHD        z163739_0038 (
PULPROG       zg30
TD            65536
SOLVENT       DMSO
NS            16
DS            2
SWH           8196.722 Hz
FIDRES        0.250144 Hz
AQ            3.9976959 sec
RG            101
DW            61.000 usec
DE            13.54 usec
TE            298.0 K
D1            1.00000000 sec
TD0           1
SF01          400.3024719 MHz
NUC1          1H
P0            3.33 usec
P1            10.00 usec
PLW1          14.12800026 W

F2 - Processing parameters
SI            65536
SF            400.3000026 MHz
WDW           EM
SSB           0
LB            0.30 Hz
GB            0
PC            1.00
    
```



(12) 4-(*p*-Iodobenzoyloxy)-1-methyl-1-piperidinium Chloride <sup>13</sup>C NMR 100 MHz (DMSO-*d*<sub>6</sub>)

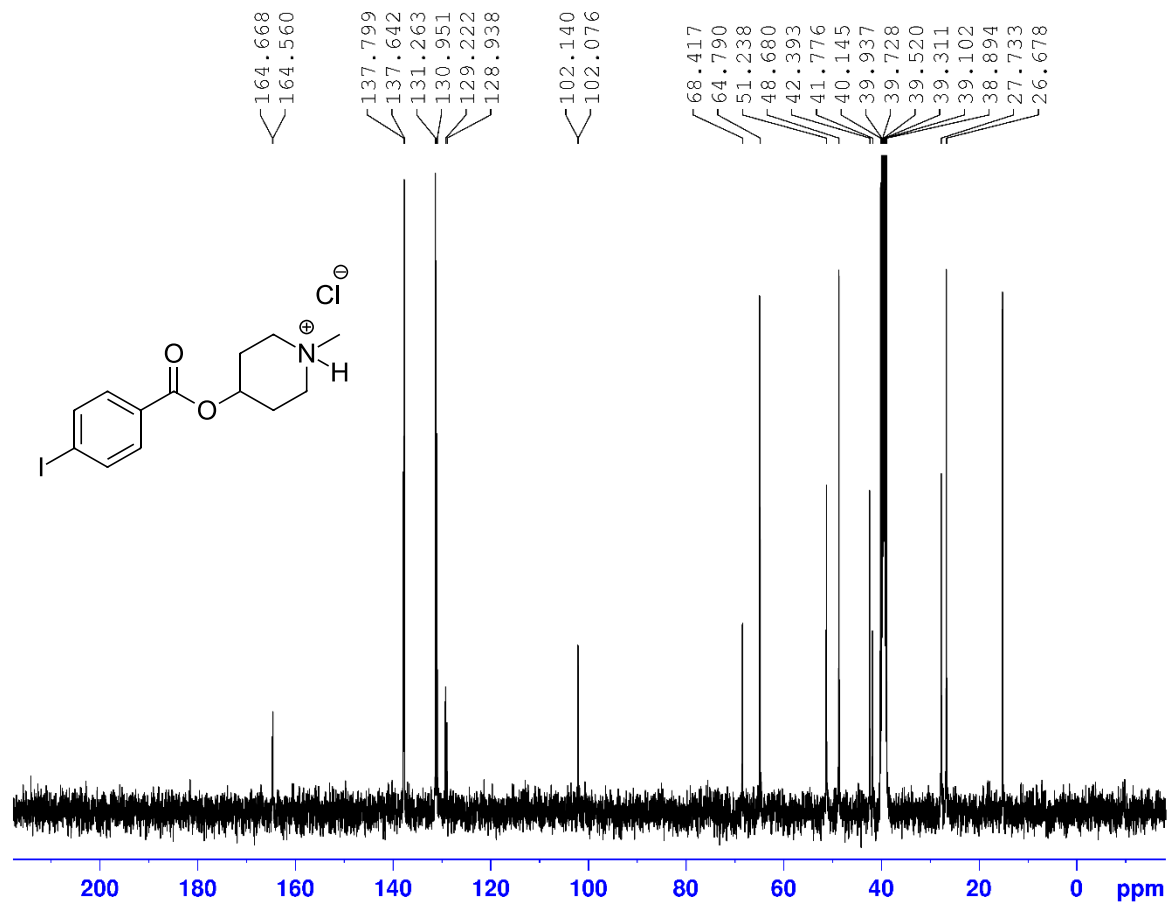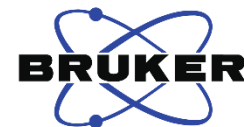

Current Data Parameters  
 NAME SB-1-105  
 EXPNO 2  
 PROCNO 1

F2 - Acquisition Parameters  
 Date\_ 20220414  
 Time 3.15 h  
 INSTRUM AVN 400  
 PROBHD Z163739\_0038 ( )  
 PULPROG udeflt  
 TD 21424  
 SOLVENT DMSO  
 NS 2304  
 DS 8  
 SSW 23809.523 Hz  
 FIDRES 2.222696 Hz  
 AQ 0.4499040 sec  
 RG 14.705  
 DW 21.000 usec  
 DE 6.50 usec  
 TE 298.0 K  
 D1 4.00000000 sec  
 D12 0.00002000 sec  
 D20 20.00000000 sec  
 TDC 1  
 SFO1 100.6555806 MHz  
 NUC1 <sup>13</sup>C  
 P1 10.00 usec  
 P13 2000.00 usec  
 P26 500.00 usec  
 PLW1 58.86999893 W  
 SPNAM[5] Crp60comp.4  
 SPOAL5 0.500  
 SPOFFS5 0 Hz  
 SPW5 8.99470043 W  
 SPNAM[8] Crp60,0.5,20.1  
 SPOAL8 0.500  
 SPOFFS8 0 Hz  
 SPW8 8.99470043 W  
 SFO2 400.3016012 MHz  
 NUC2 <sup>1</sup>H  
 CPDPRG[2] waltz165  
 PCPD2 90.00 usec  
 PLW2 14.12800026 W  
 PLWL2 0.17442000 W

F2 - Processing parameters  
 SI 131072  
 SF 100.6555620 MHz  
 WDW EM  
 SSB 0  
 LB 2.00 Hz  
 GB 0  
 PC 1.40

(12) 4-(*p*-Iodobenzoyloxy)-1-methyl-1-piperidinium Chloride High Resolution Mass Spectrum (ESI, positive mode)

| Mass Spectrum SmartFormula Report |                                    |                      |                  |                     |               |
|-----------------------------------|------------------------------------|----------------------|------------------|---------------------|---------------|
| <b>Analysis Info</b>              |                                    |                      | Acquisition Date | 7/6/2022 2:44:43 PM |               |
| Analysis Name                     | D:\Data\Xiao\July 06 2022\000008.d |                      | Operator         | x                   |               |
| Method                            | Xiao all 1.m                       |                      | Instrument       | compact             | 8255754.20059 |
| Sample Name                       | TRV 6001 HCl                       |                      |                  |                     |               |
| Comment                           |                                    |                      |                  |                     |               |
| <b>Acquisition Parameter</b>      |                                    |                      |                  |                     |               |
| Source Type                       | ESI                                | Ion Polarity         | Positive         | Set Nebulizer       | 0.5 Bar       |
| Focus                             | Not active                         | Set Capillary        | 3500 V           | Set Dry Heater      | 181 °C        |
| Scan Begin                        | 50 m/z                             | Set End Plate Offset | -500 V           | Set Dry Gas         | 4.0 l/min     |
| Scan End                          | 1500 m/z                           | Set Charging Voltage | 2000 V           | Set Divert Valve    | Source        |
|                                   |                                    | Set Corona           | 0 nA             | Set APCI Heater     | 0 °C          |

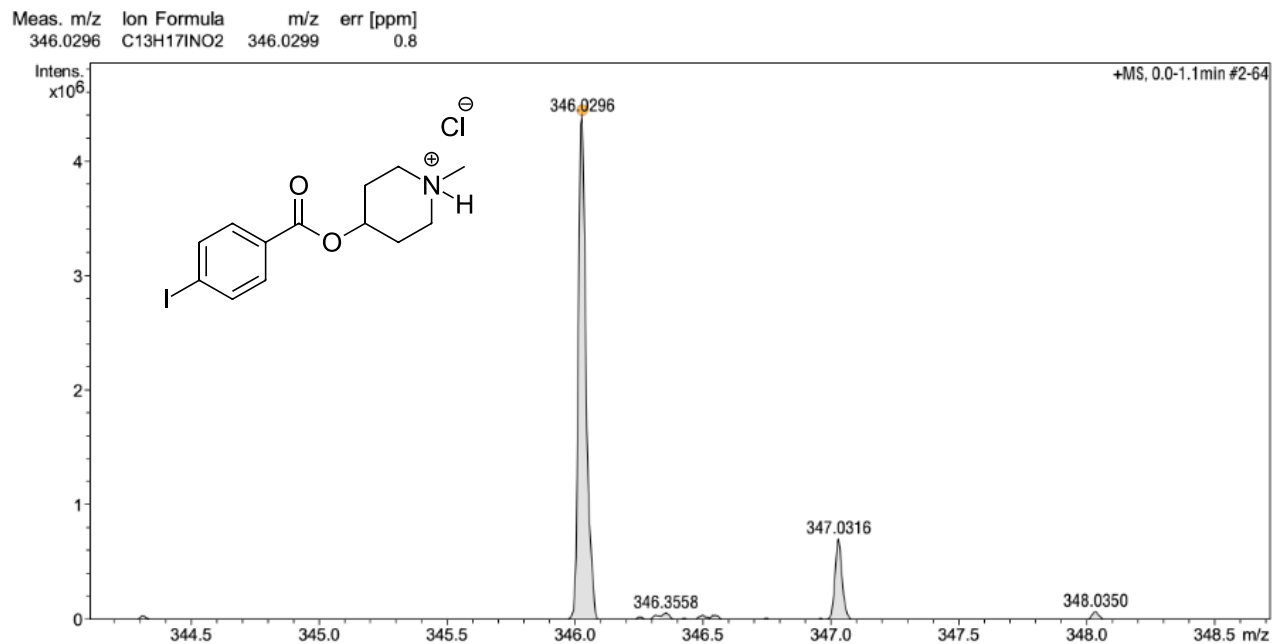

July 06 2022\000008.d

Bruker Compass DataAnalysis 4.3

printed: 7/6/2022 2:48:15 PM

by: x

Page 1 of 1

(12) 4-(*p*-Iodobenzoyloxy)-1-methyl-1-piperidinium Chloride HPLC

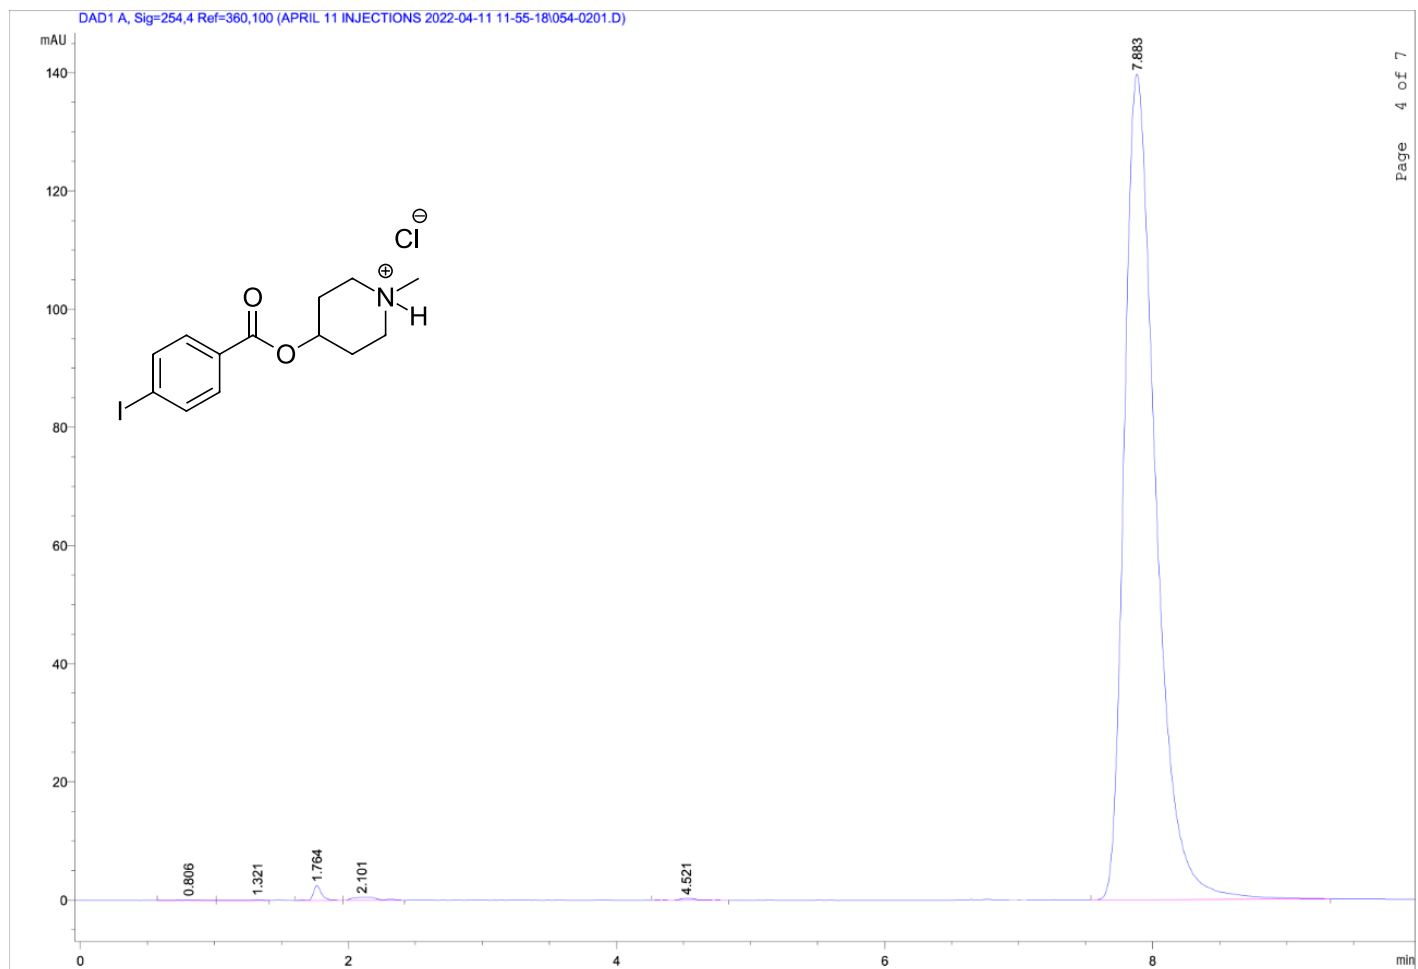

**(13) S-(1-Methylpiperidin-4-yl) p-Fluorobenzenecarbothioate Hydrochloride**

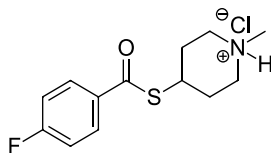

**Synthesis: S-(1-Methylpiperidin-4-yl) p-fluorobenzenecarbothioate:** To a solution of *N*-methyl-4-piperidinethiol (0.4987 g, 3.8 mmol) and triethylamine (0.80 mL, 5.7 mmol) in anhydrous dichloromethane (20 mL) was added 4-fluorobenzoyl chloride (0.55 mL, 4.6 mmol) dropwise via syringe under an argon atmosphere. The mixture was heated to reflux for 3 hrs until TLC indicated complete consumption of starting material. Upon cooling to room temperature, the mixture was diluted with DCM (20 mL). The organic layer was washed with saturated NaHCO<sub>3(aq)</sub> (20 mL), water (20 mL) and dried over Na<sub>2</sub>SO<sub>4</sub>. The mixture was gravity filtered and concentrated to afford the crude material. Purification *via* flash chromatography (5 % MeOH / DCM) afforded *S*-(1-methylpiperidin-4-yl) *p*-fluorobenzenecarbothioate (0.448 g, 47 % yield) as an off-white solid. The analytical data was similar to previously published data.<sup>[1]</sup>

**S-(1-Methylpiperidin-4-yl) p-fluorobenzenecarbothioate hydrochloride (14):** To a flask charged with *S*-(1-methylpiperidin-4-yl) *p*-fluorobenzenecarbothioate (0.206 g, 0.815 mmol) anhydrous diethyl ether was added until complete dissolution (16 mL) under an argon atmosphere. HCl in diethyl ether 1 N - 1.22 mL, 1.22 mmol) was added dropwise and stirred for 1hr. The solvent was removed *in vacuo* resulting in a white solid. The product was triturated three times with diethyl ether (20 mL), solvent was removed with a pipet and compound was dried to produce *S*-(1-methylpiperidin-4-yl) *p*-fluorobenzenecarbothioate hydrochloride (0.230 g, 97%).

*Spectroscopic data:* MP<sub>(diethyl ether)</sub>: 209-211°C, IR(ATR): 3416, 3317, 3105, 3082, 2994, 2946, 2696, 2509, 2432, 1659, 1594, 1504, 1216, 919, 638 cm<sup>-1</sup>; <sup>1</sup>H NMR (400 MHz, DMSO-*d*<sub>6</sub>) δ isomer A: 10.63 (br s, 1H), 8.01-7.97 (m, 2H), 7.42-7.38 (m, 2H), 4.09 (br s, 1H), 3.40-3.38 (m, 2H), 3.09-3.07 (m, 2H), 2.77 (s, 3H), 2.38-2.33 (m, 2H), 2.04-1.94 (m, 2H); isomer B: 10.63 (br s, 1H), 8.01-7.97 (m, 2H), 7.42-7.38 (m, 2H), 3.76-3.69 (m, 1H), 3.46-3.43 (m, 2H), 3.17-3.10 (m, 2H), 2.73 (s, 3H), 2.17-2.13 (m, 2H), 2.04-1.94 (m, 2H); <sup>13</sup>C NMR (100.7 MHz, DMSO-*d*<sub>6</sub>) δ isomer A: 188.6, 164.3 (d, <sup>1</sup>J<sub>C,F</sub> = 252.9 Hz), 132.9 (d, <sup>4</sup>J<sub>C,F</sub> = 2.7 Hz), 129.9 (d, <sup>3</sup>J<sub>C,F</sub> = 9.7 Hz), 116.4 (d, <sup>2</sup>J<sub>C,F</sub> = 22.4 Hz), 50.3, 41.7, 36.6, 27.3, isomer B: 188.8, 166.8 (d, <sup>1</sup>J<sub>C,F</sub> = 252.9 Hz), 132.9 (d, <sup>4</sup>J<sub>C,F</sub> = 2.7 Hz), 129.9 (d, <sup>3</sup>J<sub>C,F</sub> = 9.7 Hz), 116.4 (d, <sup>4</sup>J<sub>C,F</sub> = 22.4 Hz), 53.1, 42.5, 37.1, 29.0; LRMS (ESI<sup>+</sup>): 254.1 (M<sup>+</sup>); HRMS (ESI<sup>+</sup>): calculated for C<sub>13</sub>H<sub>17</sub>FNOS<sup>+</sup>: 254.1010 amu; found for C<sub>13</sub>H<sub>17</sub>FNOS<sup>+</sup>: 254.1010 amu; HPLC purity at 254nm (75% CH<sub>3</sub>CN : 10% CH<sub>3</sub>OH : 15% aqueous triethylamine [0.1% triethylamine in H<sub>2</sub>O], retention time 5.912 mins): 98.9 %.

(13) *S*-(1-Methylpiperidin-4-yl) *p*-Fluorobenzenecarbothioate Hydrochloride IR(ATR)

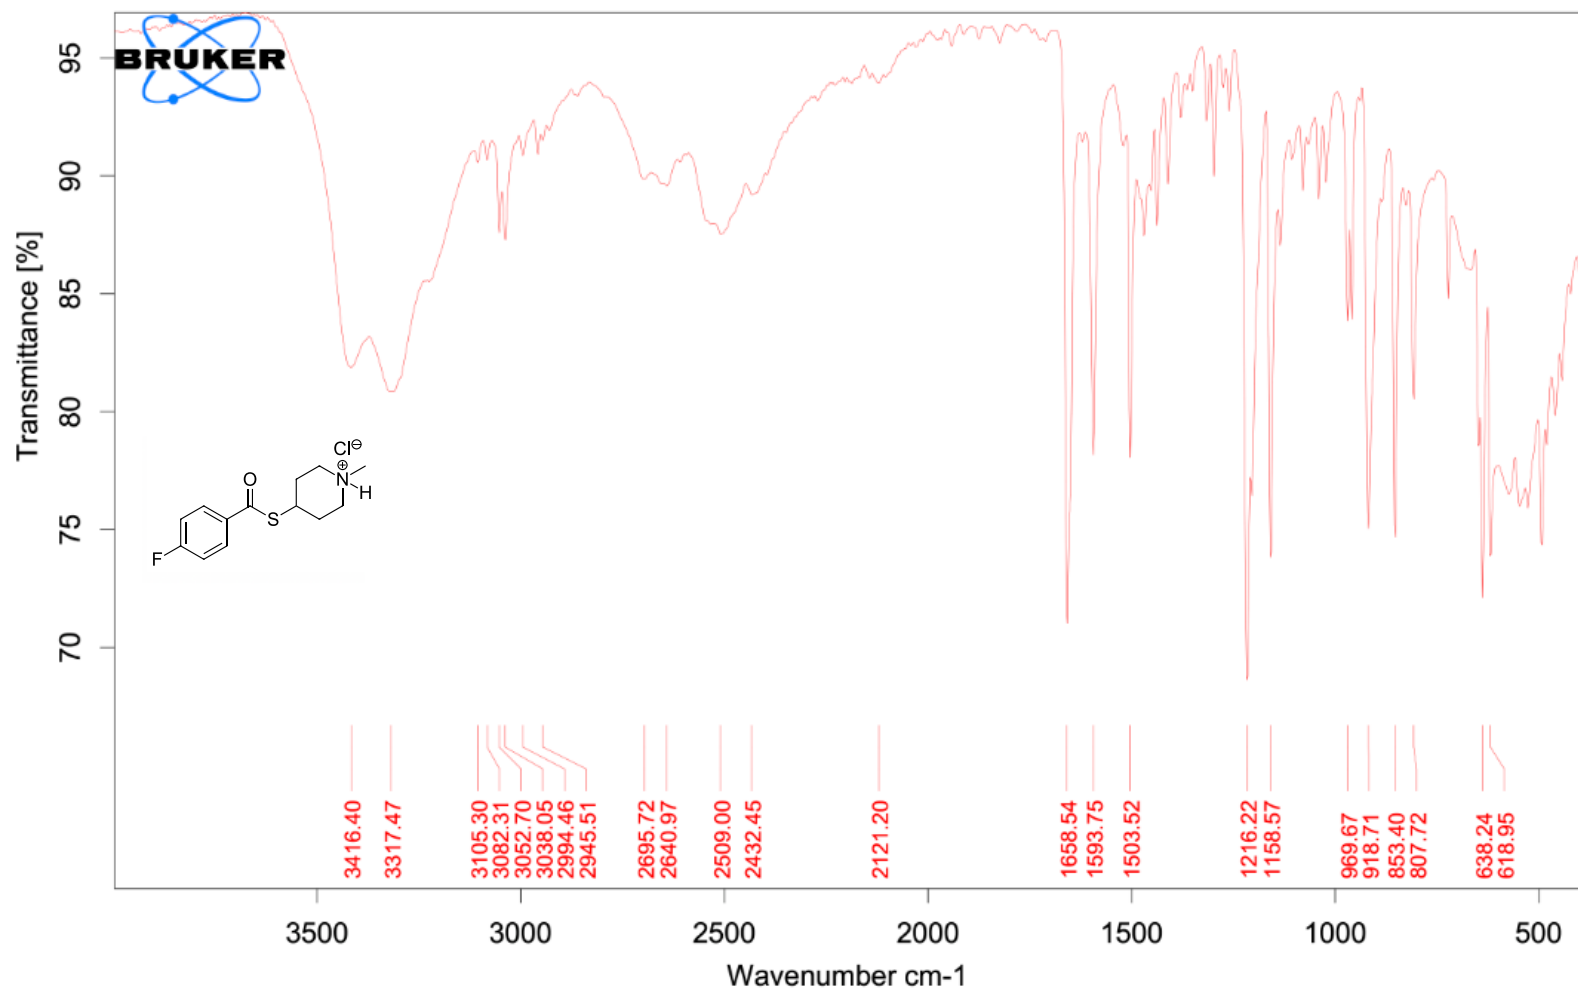

(13) *S*-(1-Methylpiperidin-4-yl) *p*-Fluorobenzenecarbothioate Hydrochloride <sup>1</sup>H NMR 400 MHz (DMSO-*d*<sub>6</sub>)

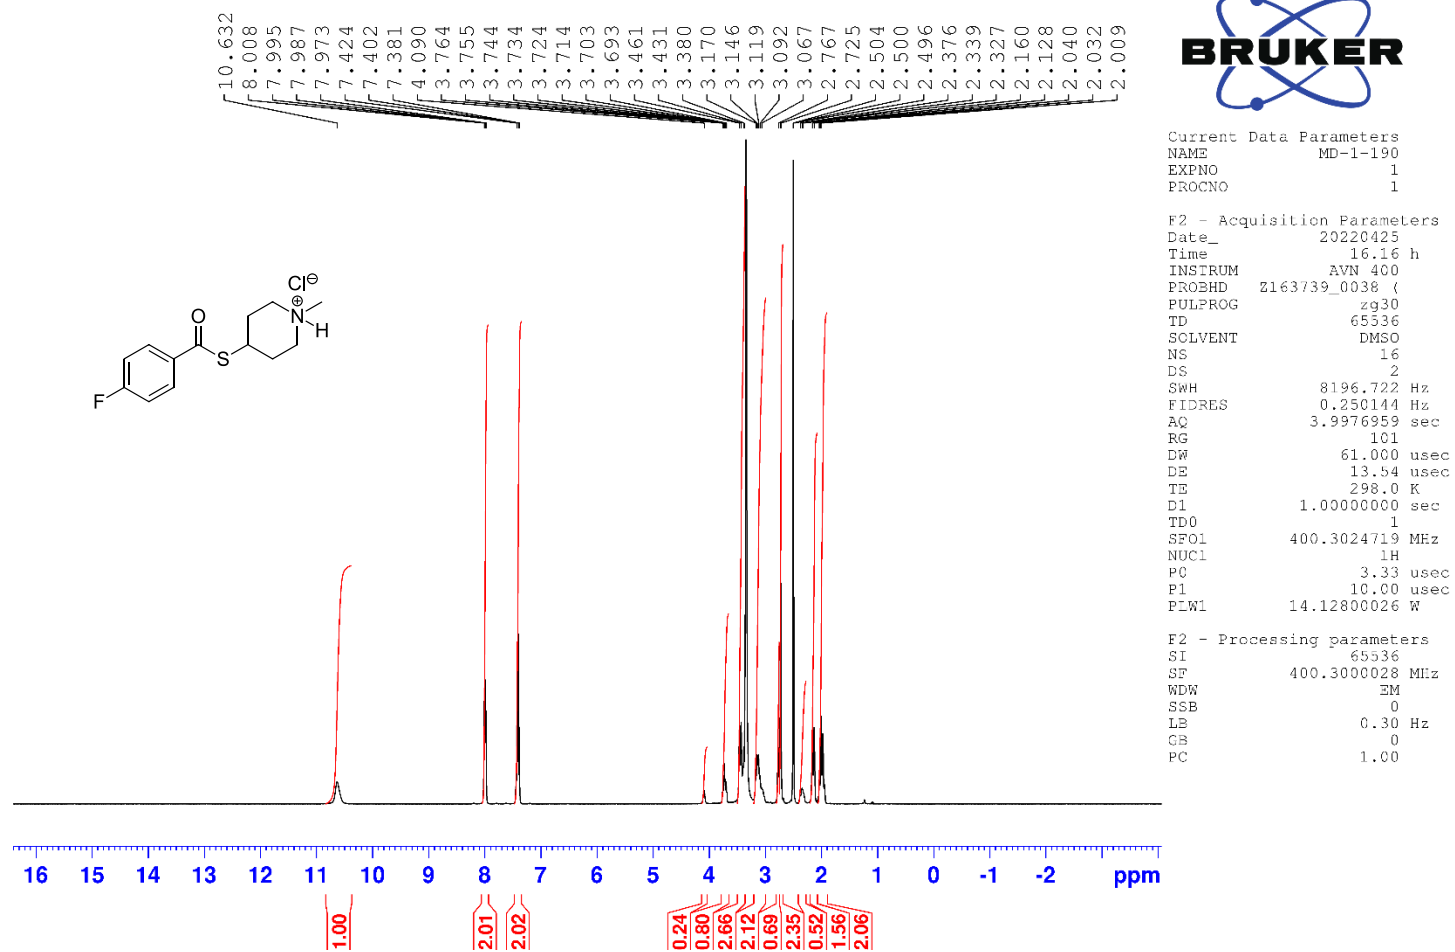

(13) *S*-(1-Methylpiperidin-4-yl) *p*-Fluorobenzenecarbothioate Hydrochloride <sup>13</sup>C NMR 100 MHz (DMSO-*d*<sub>6</sub>)

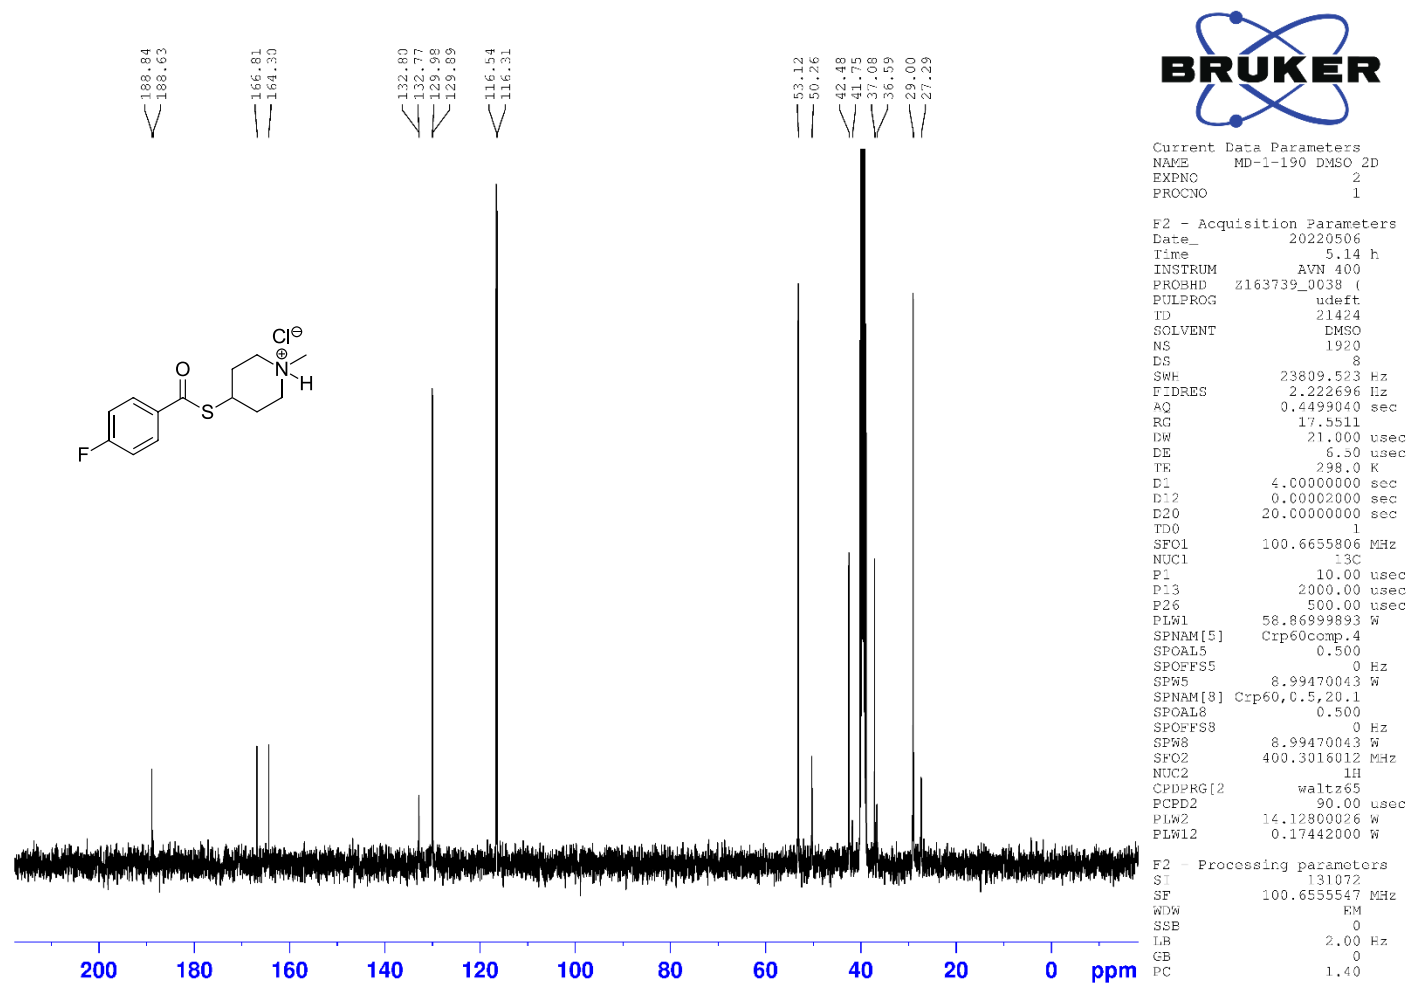



(13) *S*-(1-Methylpiperidin-4-yl) *p*-Fluorobenzenecarbothioate Hydrochloride High Resolution Mass Spectrum (ESI, positive mode)

### Mass Spectrum SmartFormula Report

**Analysis Info**

Analysis Name D:\Data\Xiao\July 07 2022\000015.d  
Method Xiao all 1.m  
Sample Name TRV 6504 HCl  
Comment

Acquisition Date 7/7/2022 10:12:10 AM  
Operator x  
Instrument compact 8255754.20059

**Acquisition Parameter**

|             |            |                      |          |                  |           |
|-------------|------------|----------------------|----------|------------------|-----------|
| Source Type | ESI        | Ion Polarity         | Positive | Set Nebulizer    | 0.5 Bar   |
| Focus       | Not active | Set Capillary        | 3500 V   | Set Dry Heater   | 180 °C    |
| Scan Begin  | 50 m/z     | Set End Plate Offset | -500 V   | Set Dry Gas      | 4.0 l/min |
| Scan End    | 1500 m/z   | Set Charging Voltage | 2000 V   | Set Divert Valve | Source    |
|             |            | Set Corona           | 0 nA     | Set APCI Heater  | 0 °C      |

| Meas. m/z | Ion Formula                          | m/z      | err [ppm] |
|-----------|--------------------------------------|----------|-----------|
| 254.1010  | C <sub>13</sub> H <sub>17</sub> FNOS | 254.1009 | -0.3      |

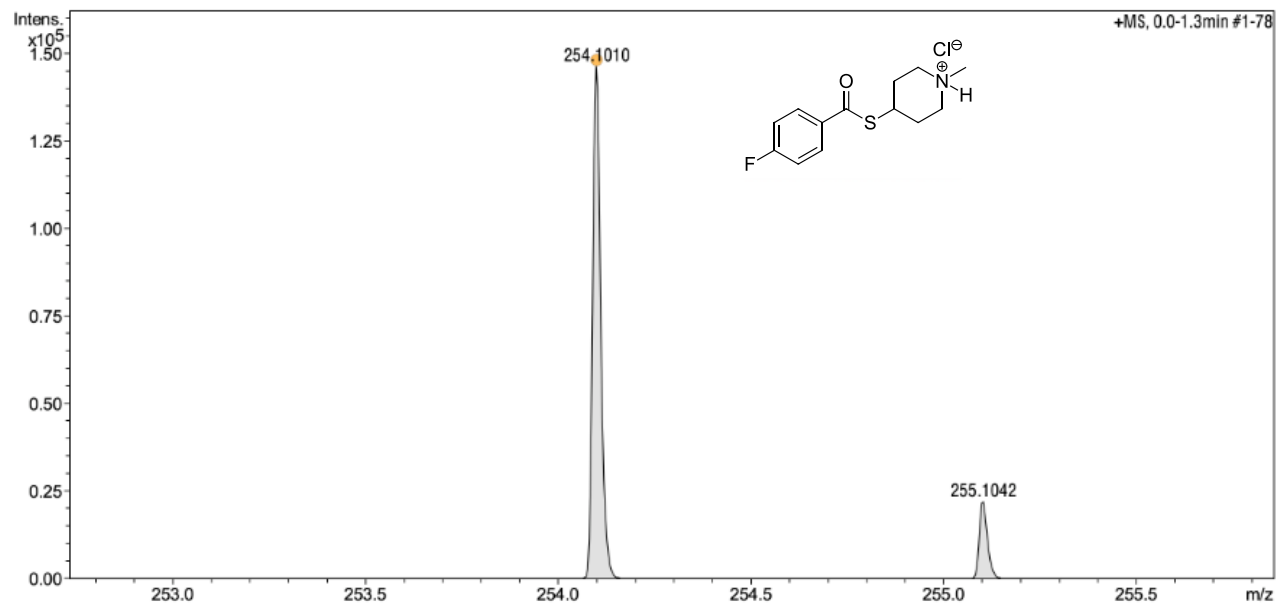

(13) *S*-(1-Methylpiperidin-4-yl) *p*-Fluorobenzenecarbothioate Hydrochloride HPLC

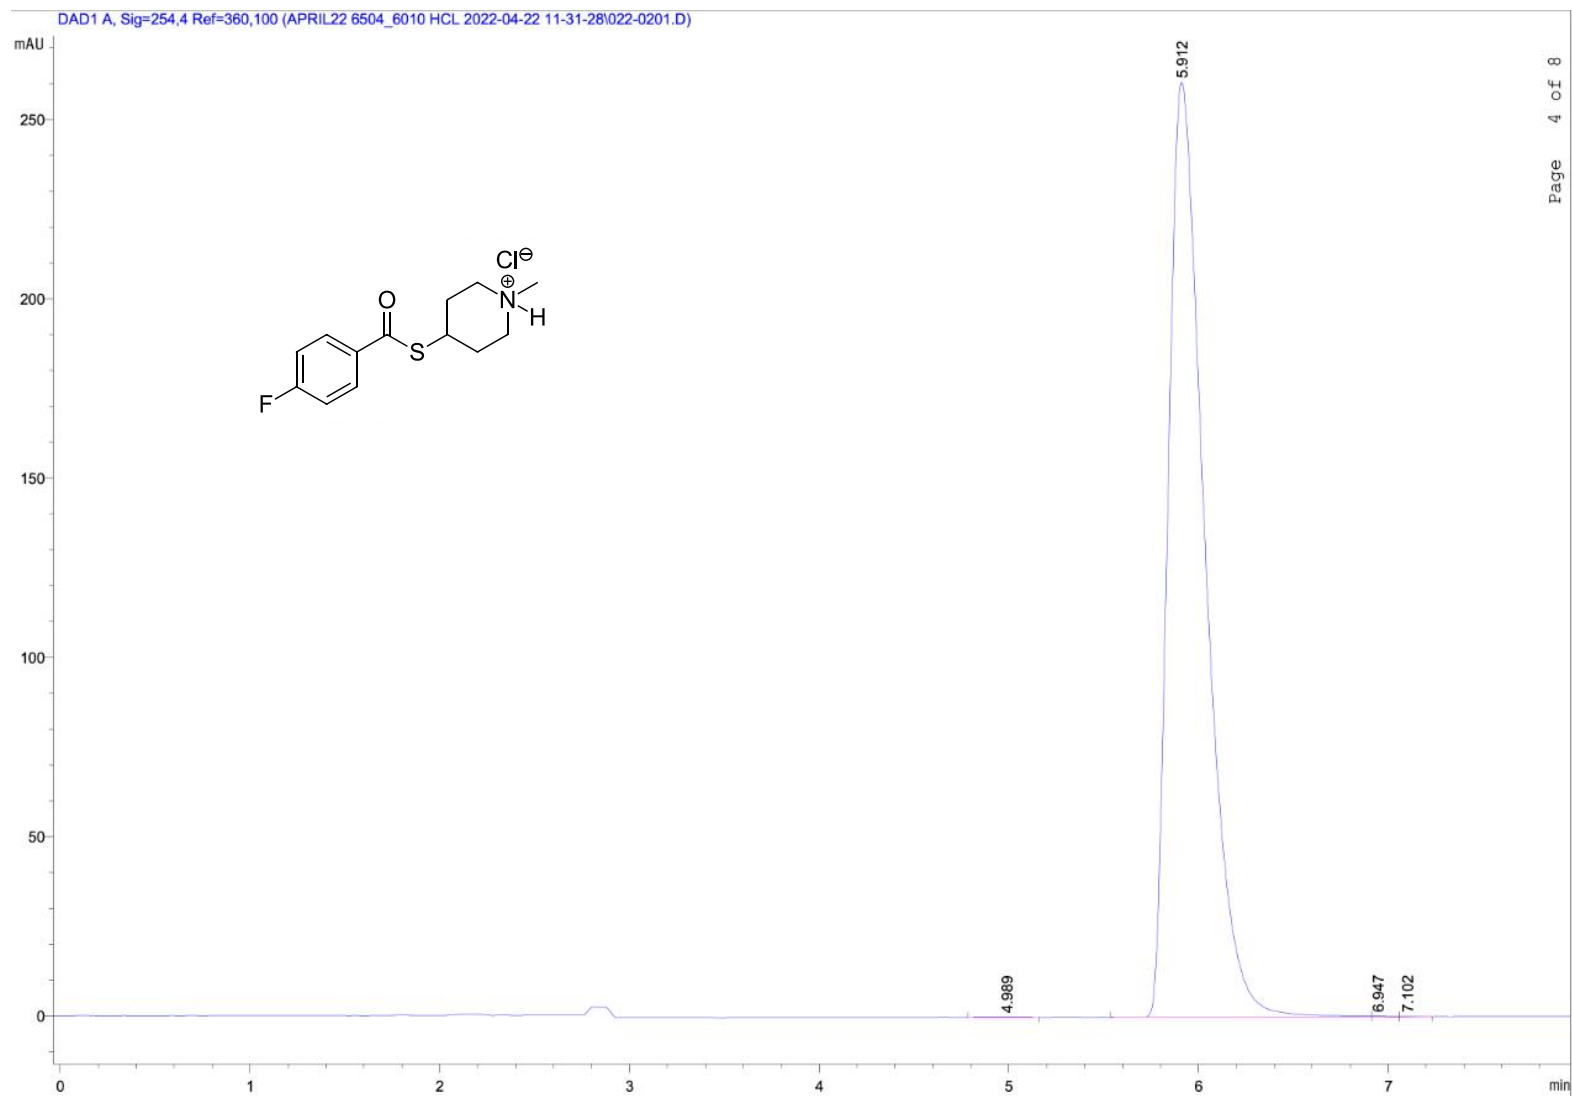

**(14)** 4-(*p*-Fluorobenzoyloxy)-1-methyl-1-piperidinium Chloride

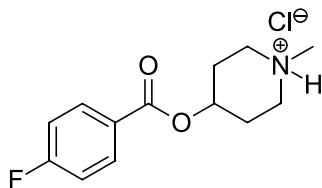

*Synthesis:* ***N*-Methylpiperidin-4-yl 4-fluorobenzoate:** 4-fluorobenzoyl chloride (0.76 mL, 6.3 mmol), triethylamine (2.2 mL, 15.8 mmol) and DMAP (0.138 g, 1.13 mmol) were dissolved in anhydrous dichloromethane (32 mL) under an argon atmosphere. *N*-Methyl-4-piperidinol (0.979 g, 6.3 mmol) was added to the stirred solution in one portion. The reaction mixture was stirred for 3 hrs at room temperature. After this time, the reaction was quenched with brine (30 mL) and extracted with dichloromethane (3 × 15 mL). The combined organic layers were dried over Na<sub>2</sub>SO<sub>3</sub>, gravity filtered, and the filtrate was concentrated *in vacuo* to produce a clear colourless oil. The crude mixture was purified by silica gel column chromatography (4% MeOH/DCM) to produce a clear colourless oil, *N*-Methylpiperidin-4-yl 4-fluorobenzoate (1.47 g, 98%). The analytical data was similar to previously published data.<sup>[1]</sup>

**4-(*p*-Fluorobenzoyloxy)-1-methyl-1-piperidinium chloride (13):** To a flask charged with *N*-methylpiperidin-4-yl 4-fluorobenzoate (0.748 g, 3.15 mmol) anhydrous diethyl ether was added until complete dissolution (63 mL) under an argon atmosphere. HCl in diethyl ether 1N (4.73 mL, 4.73 mmol) was added dropwise and stirred for 1 hr at room temperature. The solvent was removed *in vacuo* resulting in a white solid. The compound was triturated with diethyl ether (20 mL) and solvent was removed with a pipet. This process was repeated two more times. The material was dried *in vacuo* to produce 4-(*p*-fluorobenzoyloxy)-1-methyl-1-piperidinium chloride (**13**, 0.773 g, 90%, 2:3 mixture of isomers) as a white solid.

*Spectroscopic data:* MP<sub>(diethyl ether)</sub>: 219-221°C (Lit MP<sub>(acetone/ethanol)</sub>: 227-228°C); IR (ATR) 2942, 2498, 2431, 1729, 1274, 1257, 766, 605 cm<sup>-1</sup>; <sup>1</sup>H NMR (400 MHz, DMSO-*d*<sub>6</sub>) δ isomer A: 10.78 (br s, 1H), 8.06-8.02 (m, 2H), 7.40-7.34 (m, 2H), 5.10-5.03 (m, 1H), 3.40-3.37 (m, 2H), 3.18-3.10 (m, 2H), 2.73 (d, J = 4.0 Hz, 3H), 2.22-2.14 (m, 2H), 2.07-1.96 (m, 2H); isomer B: 10.59 (br s, 1H), 8.19-8.16 (m, 2H), 7.40-7.34 (m, 2H), 5.26-5.23 (m, 1H), 3.48-3.45 (m, 2H), 3.26-3.18 (m, 2H), 2.80 (d, J = 4.5 Hz, 3H), 2.22-2.14 (m, 2H), 2.07-1.96 (m, 2H); <sup>13</sup>C NMR (100.7 MHz, CD<sub>3</sub>OD) δ isomer A: 165.3 (d, <sup>1</sup>J<sub>C,F</sub> = 246.4 Hz), 163.9, 132.2 (d, <sup>3</sup>J<sub>C,F</sub> = 9.7 Hz), 126.0, 115.9 (d, <sup>2</sup>J<sub>C,F</sub> = 22.5 Hz), 68.3, 51.2, 41.8, 27.7; isomer B: 165.3 (d, <sup>1</sup>J<sub>C,F</sub> = 246.4 Hz), 164.0, 132.5 (d, <sup>3</sup>J<sub>C,F</sub> = 9.6 Hz), 126.3, 115.8 (d, <sup>2</sup>J<sub>C,F</sub> = 21.9 Hz), 64.6, 48.7, 42.4, 26.7; LRMS (ESI<sup>+</sup>): 238.1 (M<sup>+</sup>); HRMS (ESI<sup>+</sup>): calculated for C<sub>13</sub>H<sub>17</sub>FNO<sub>2</sub><sup>+</sup>: 238.1238 amu; found for C<sub>13</sub>H<sub>17</sub>FNO<sub>2</sub><sup>+</sup>: 238.1244 amu; HPLC purity at 254nm (75% CH<sub>3</sub>CN : 10% CH<sub>3</sub>OH : 15% aqueous triethylamine [0.1% triethylamine in H<sub>2</sub>O], retention time 4.854 mins): 100 %.<sup>[6]</sup>

(14) 4-(*p*-Fluorobenzoyloxy)-1-methyl-1-piperidinium Chloride IR(ATR)

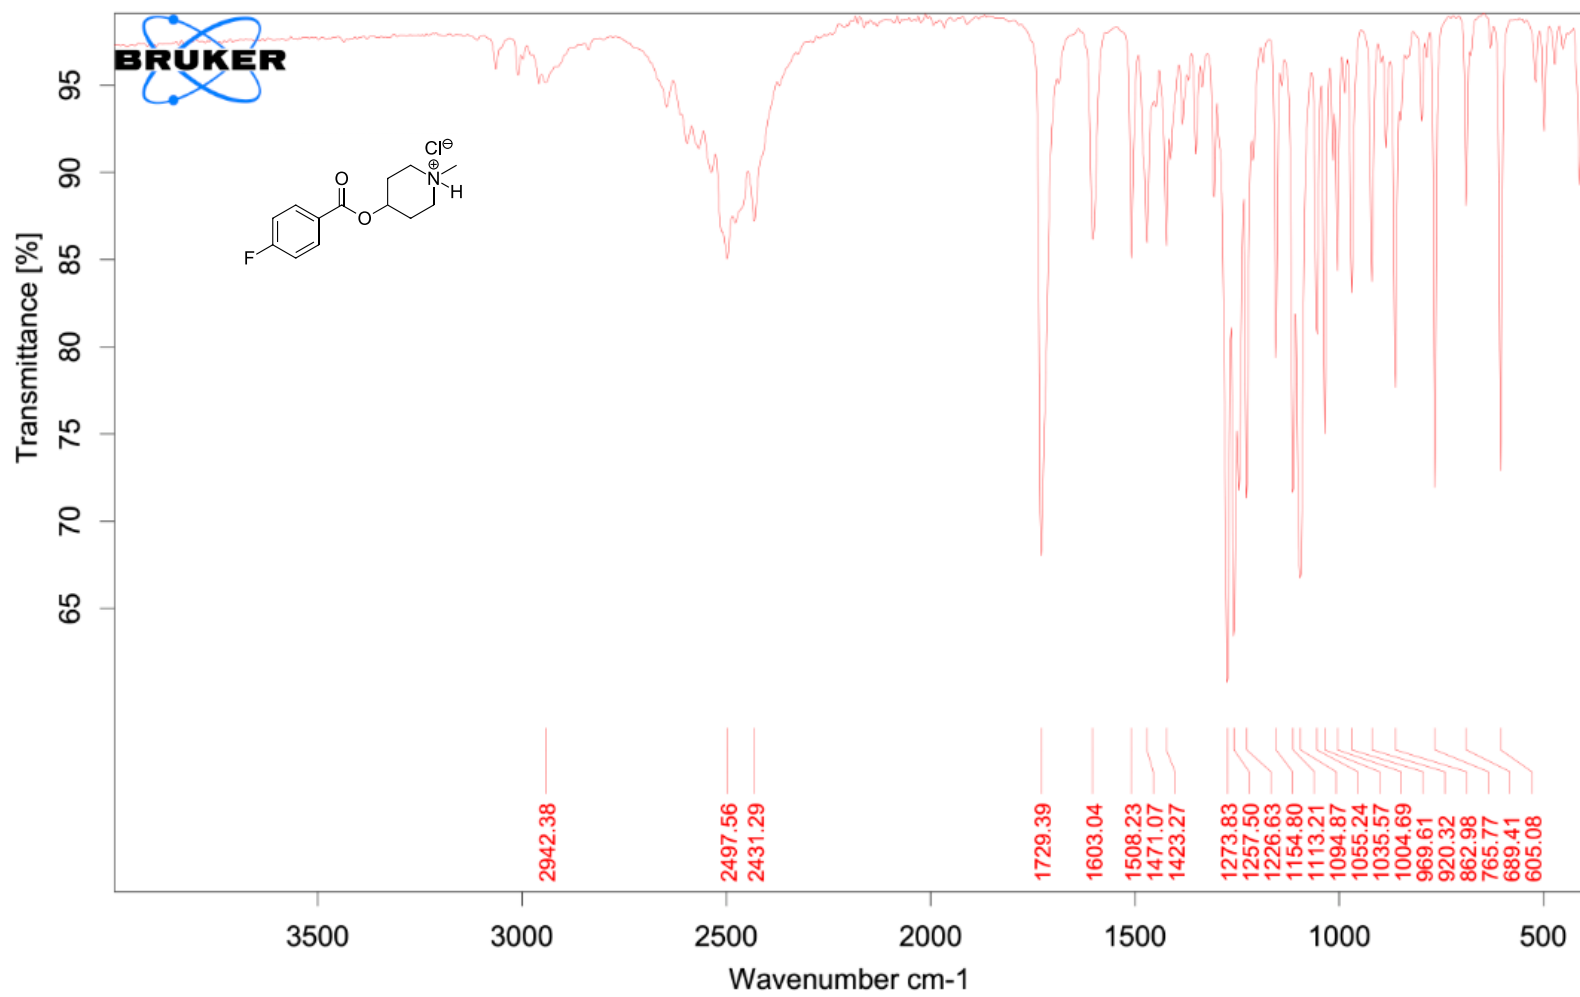

(14) 4-(*p*-Fluorobenzoyloxy)-1-methyl-1-piperidinium Chloride <sup>1</sup>H NMR 400 MHz (DMSO-*d*<sub>6</sub>)

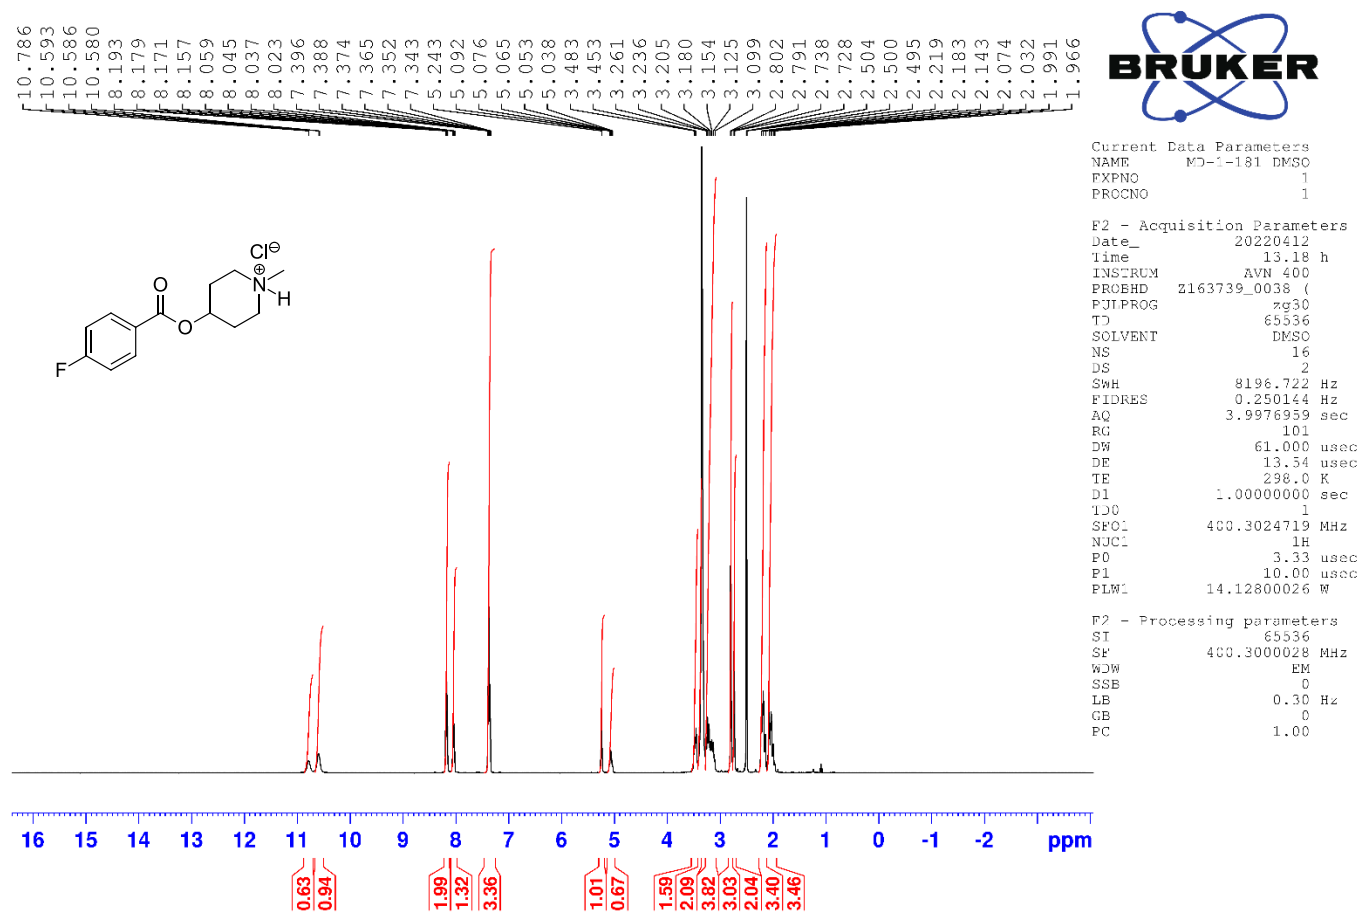

(14) 4-(*p*-Fluorobenzoyloxy)-1-methyl-1-piperidinium Chloride  $^{13}\text{C}$  NMR 100 MHz (DMSO-*d*<sub>6</sub>)

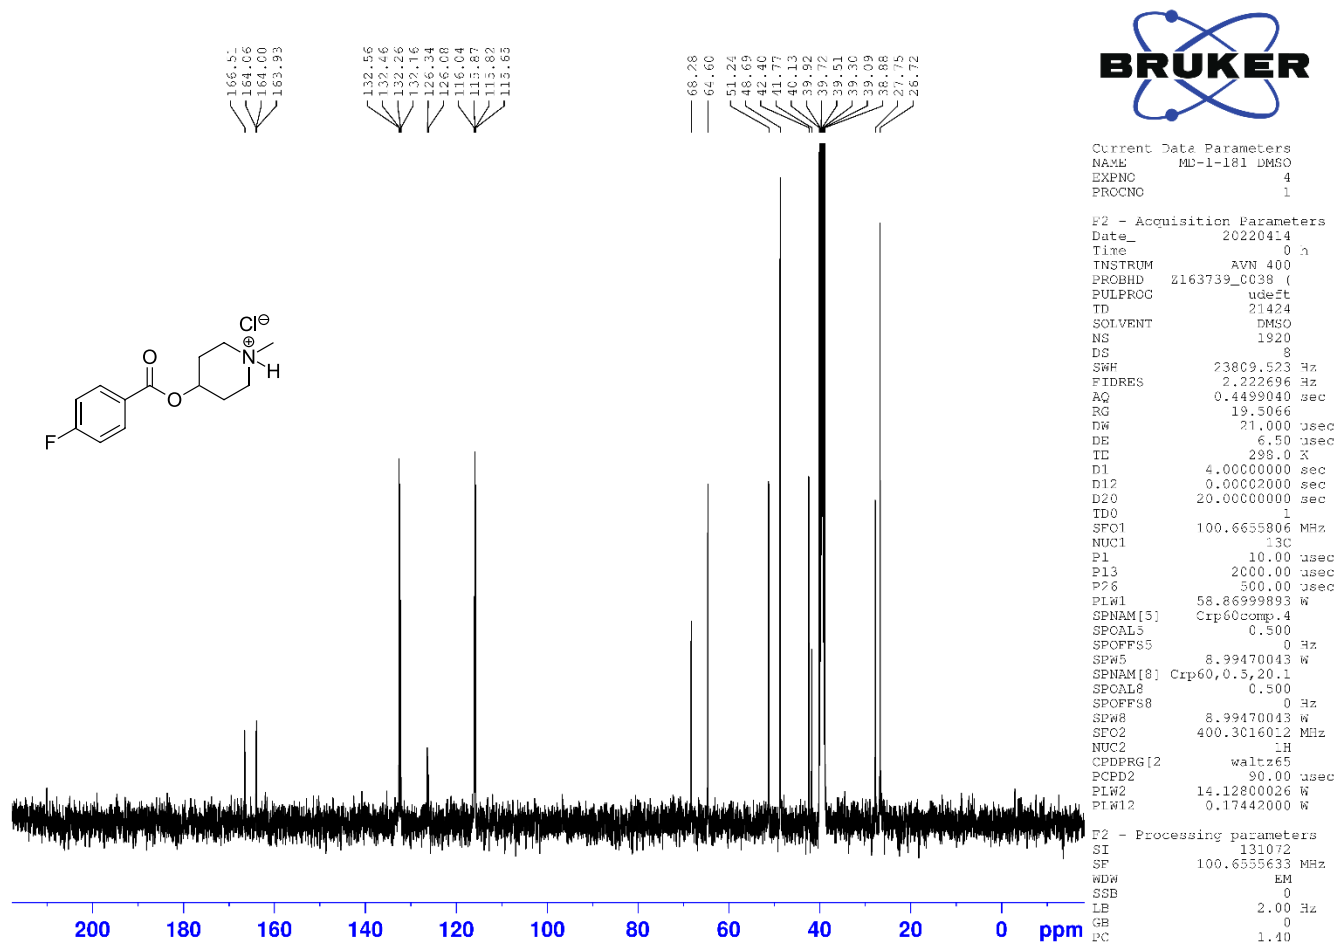

(14) 4-(*p*-Fluorobenzoyloxy)-1-methyl-1-piperidinium Chloride High Resolution Mass Spectrum (ESI, positive mode)

### Mass Spectrum SmartFormula Report

**Analysis Info**

Analysis Name D:\Data\Xiao\July 07 2022\000018.d  
Method Xiao all 1.m  
Sample Name TRV 6501 HCl  
Comment

Acquisition Date 7/7/2022 10:21:47 AM  
Operator x  
Instrument compact 8255754.20059

**Acquisition Parameter**

|             |            |                      |          |                  |           |
|-------------|------------|----------------------|----------|------------------|-----------|
| Source Type | ESI        | Ion Polarity         | Positive | Set Nebulizer    | 0.5 Bar   |
| Focus       | Not active | Set Capillary        | 3500 V   | Set Dry Heater   | 180 °C    |
| Scan Begin  | 50 m/z     | Set End Plate Offset | -500 V   | Set Dry Gas      | 4.0 l/min |
| Scan End    | 1500 m/z   | Set Charging Voltage | 2000 V   | Set Divert Valve | Source    |
|             |            | Set Corona           | 0 nA     | Set APCI Heater  | 0 °C      |

| Meas. m/z | Ion Formula                                      | m/z      | err [ppm] |
|-----------|--------------------------------------------------|----------|-----------|
| 238.1244  | C <sub>13</sub> H <sub>17</sub> FNO <sub>2</sub> | 238.1238 | -2.4      |

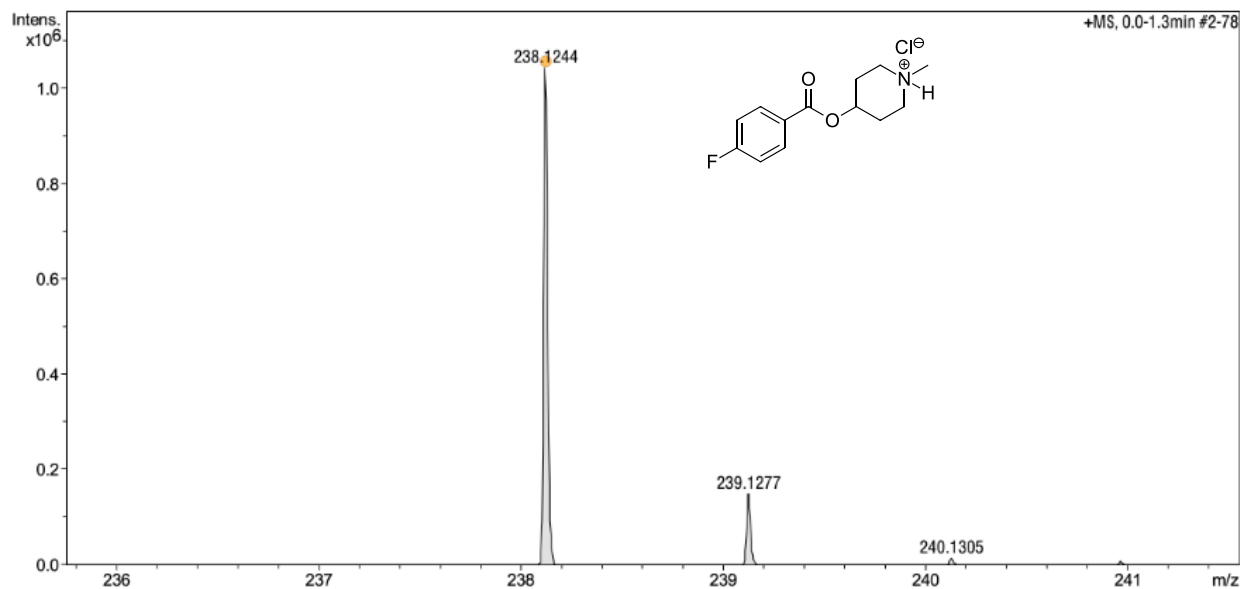

July 07 2022\000018.d

Bruker Compass DataAnalysis 4.3

printed: 7/7/2022 10:24:59 AM

by: x

Page 1 of 1



(14) 4-(*p*-Fluorobenzoyloxy)-1-methyl-1-piperidinium Chloride HPLC

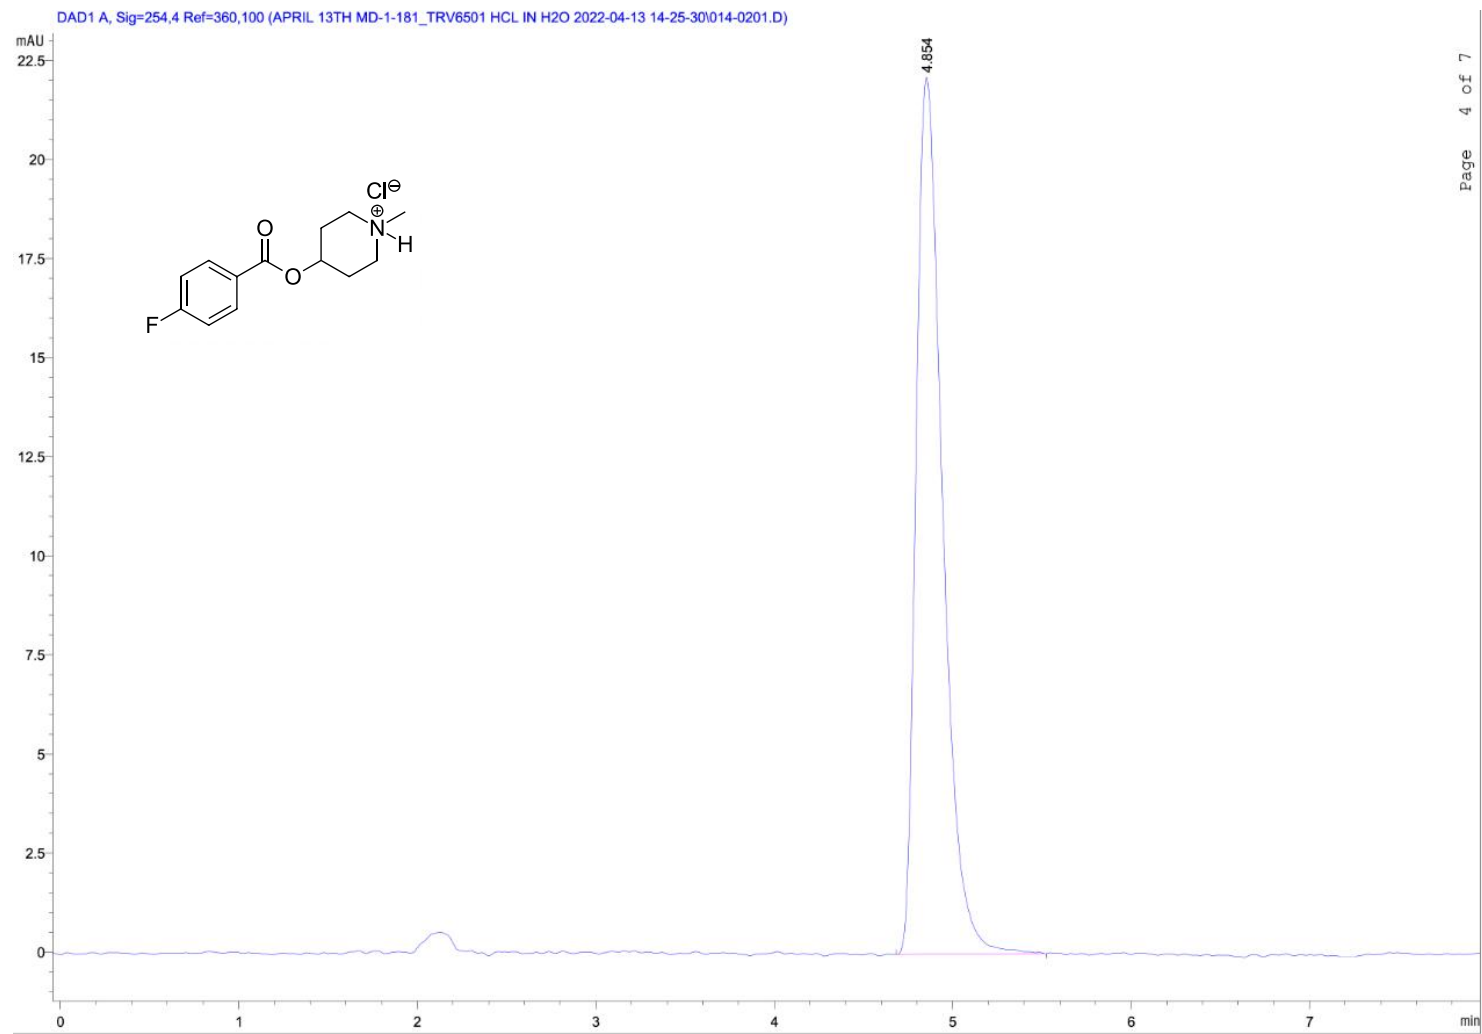

## *Alkyl N-Methylpyrrolidinyl Derivatives*

(15) (3*S*)-*S*-(1-Methylpyrrolidin-3-yl) Ethanethioate

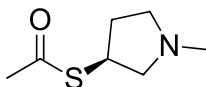

**Synthesis: (3*R*)-3-(Mesyloxy)-1-methylpyrrolidine:** (3*R*)-(-)-1-Methyl-3-pyrrolidinol (5.00 mL, 45.5 mmol) and triethylamine (9.52 mL, 68.3 mmol) were dissolved in anhydrous dichloromethane (152 mL) and cooled to 0°C with an ice bath. Methanesulfonyl chloride (5.22 mL, 52.4 mmol) was added dropwise at 0°C. The ice bath was removed after 5 mins, and the reaction was stirred overnight. The reaction was quenched with brine (50 mL), extracted with dichloromethane (3 × 15 mL). The combined organic layers were dried over Na<sub>2</sub>SO<sub>3</sub>, gravity filtered, and the filtrate was concentrated *in vacuo* to produce a viscous yellow liquid (4.14 g, 51%). Product confirmed by <sup>1</sup>H NMR and immediately carried through to next step.

Spectroscopic data: IR(ATR): 3026, 2942, 2784, 1346, 1166, 521 cm<sup>-1</sup>; <sup>1</sup>H NMR (400 MHz, CDCl<sub>3</sub>) δ 5.23-5.19 (m, 1H), 3.01 (s, 3H), 2.90 (dd, J = 11.3, 2.2 Hz, 1H), 2.87-2.83 (m, 1H), 2.72 (dd, J = 11.3, 5.7 Hz, 1H), 2.39-2.28 (m, 2H), 2.38 (s, 3H), 2.14-2.06 (m, 1H); <sup>13</sup>C NMR (100.7 MHz, CDCl<sub>3</sub>) δ 80.6 (1), 62.4 (2), 54.6(2), 41.9 (3), 38.7 (3), 33.1 (2); HRMS (ESI<sup>+</sup>): calculated for C<sub>6</sub>H<sub>14</sub>NO<sub>3</sub>S<sup>+</sup>: 180.0689 amu; found for C<sub>6</sub>H<sub>14</sub>NO<sub>3</sub>S<sup>+</sup>: 180.0689 amu.

**(3*S*)-*S*-(1-Methylpyrrolidin-3-yl) ethanethioate:** (3*R*)-3-(Mesyloxy)-1-methylpyrrolidine (2.35 g, 13.1 mmol) was dissolved in anhydrous DMF (44 mL) under an argon atmosphere. Potassium thioacetate (4.50 g, 39.4 mmol) was added in 3 portions, allowing the salt to dissolve before adding more. After the potassium thioacetate addition and dissolution, the reaction was heated to

30°C for 1hr. After this time, the reaction was cooled to room temperature, diluted with water (50 mL) and extracted with EtOAc (3 × 15 mL). The combined organic layers were washed with water (5 × 20 mL), dried over Na<sub>2</sub>SO<sub>3</sub>, and gravity filtered. The filtrate was concentrated *in vacuo* to afford a viscous red liquid (1.88 g). A portion of this material (0.462 g) was purified using flash column chromatography through silica gel (5% MeOH/DCM) to produce a viscous red liquid (0.3183 g, 40% yield).

*Spectroscopic Data:* IR(ATR): 2963, 2940, 2774, 1685, 1116, 953, 629 cm<sup>-1</sup>; <sup>1</sup>H NMR (400 MHz, DMSO-*d*<sub>6</sub>) δ 3.82-3.76 (m, 1H), 2.78 (dd, J = 9.7, 7.3 Hz, 1H), 2.58-2.53 (m, 1H), 2.38-2.32 (m, 2H), 2.30-2.23 (m, 1H), 2.28 (s, 3H), 2.23 (s, 3H), 1.64-1.57 (m, 1H); <sup>13</sup>C NMR (100.7 MHz, DMSO-*d*<sub>6</sub>) δ 195.8 (0), 62.2 (2), 54.8 (2), 41.4 (3), 39.8 (1), 31.7 (2), 30.3 (3); HRMS (ESI<sup>+</sup>): calculated for C<sub>7</sub>H<sub>14</sub>NOS<sup>+</sup>: 160.0791 amu; found for C<sub>7</sub>H<sub>14</sub>NOS<sup>+</sup>: 160.0793 amu; HPLC purity at 230nm (75% CH<sub>3</sub>CN : 10% CH<sub>3</sub>OH : 15% aqueous triethylamine [0.1% triethylamine in H<sub>2</sub>O], retention time 3.330 mins): 91.5 %.

(15) (3*S*)-*S*-(1-Methylpyrrolidin-3-yl) Ethanethioate IR(ATR)

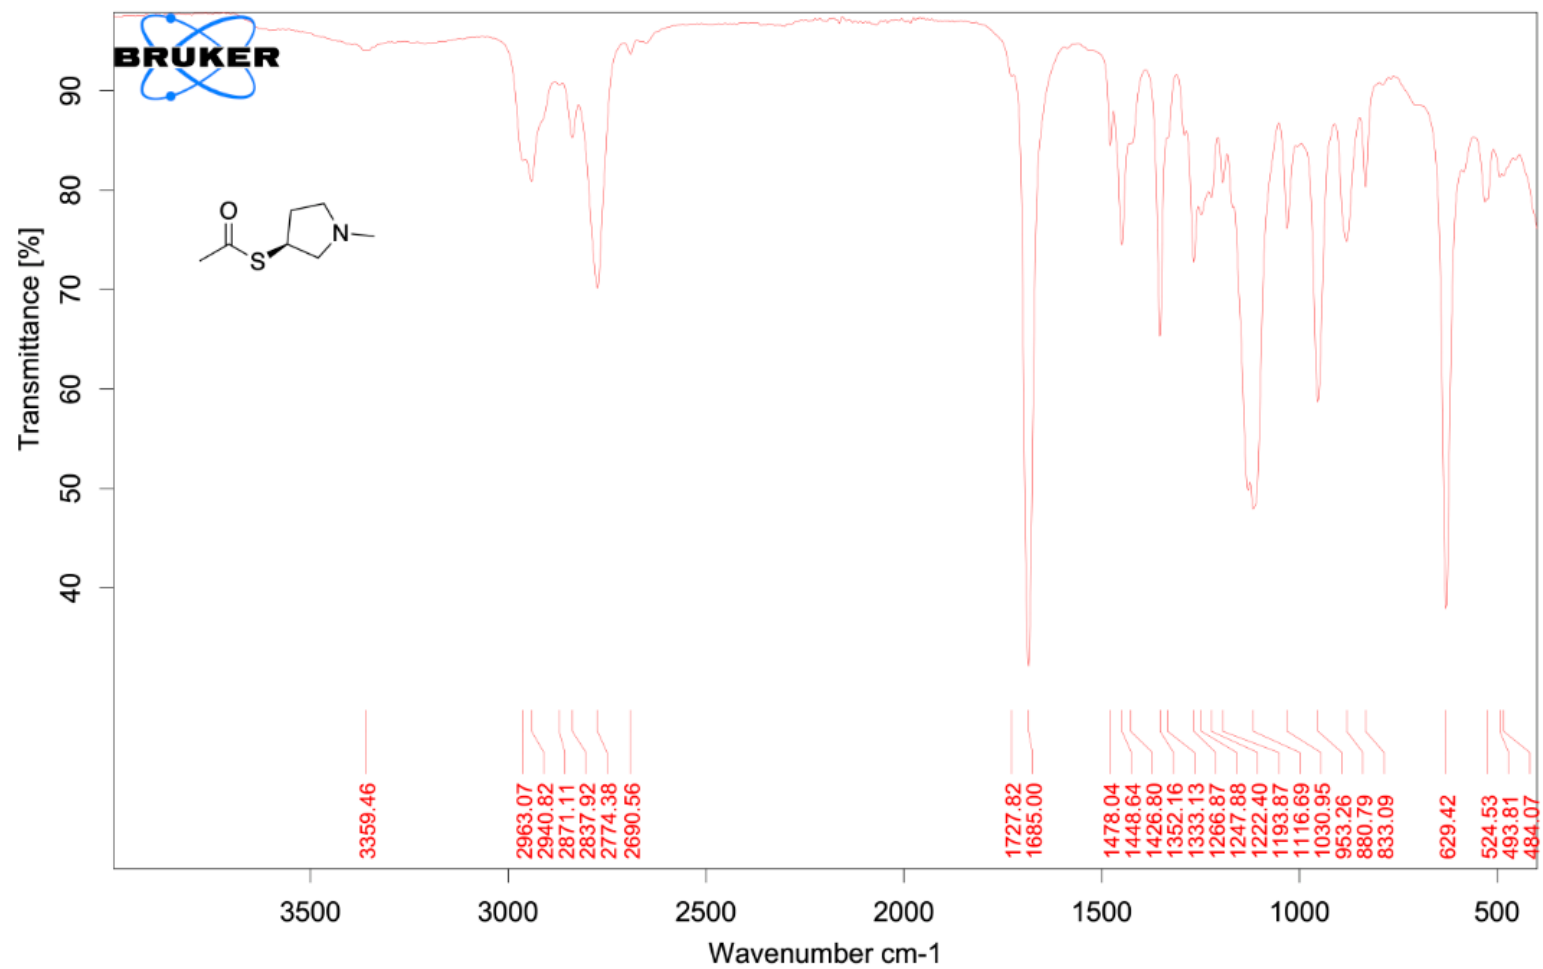

(15) (3S)-S-(1-Methylpyrrolidin-3-yl) Ethanethioate <sup>1</sup>H NMR 400 MHz (DMSO-*d*<sub>6</sub>)

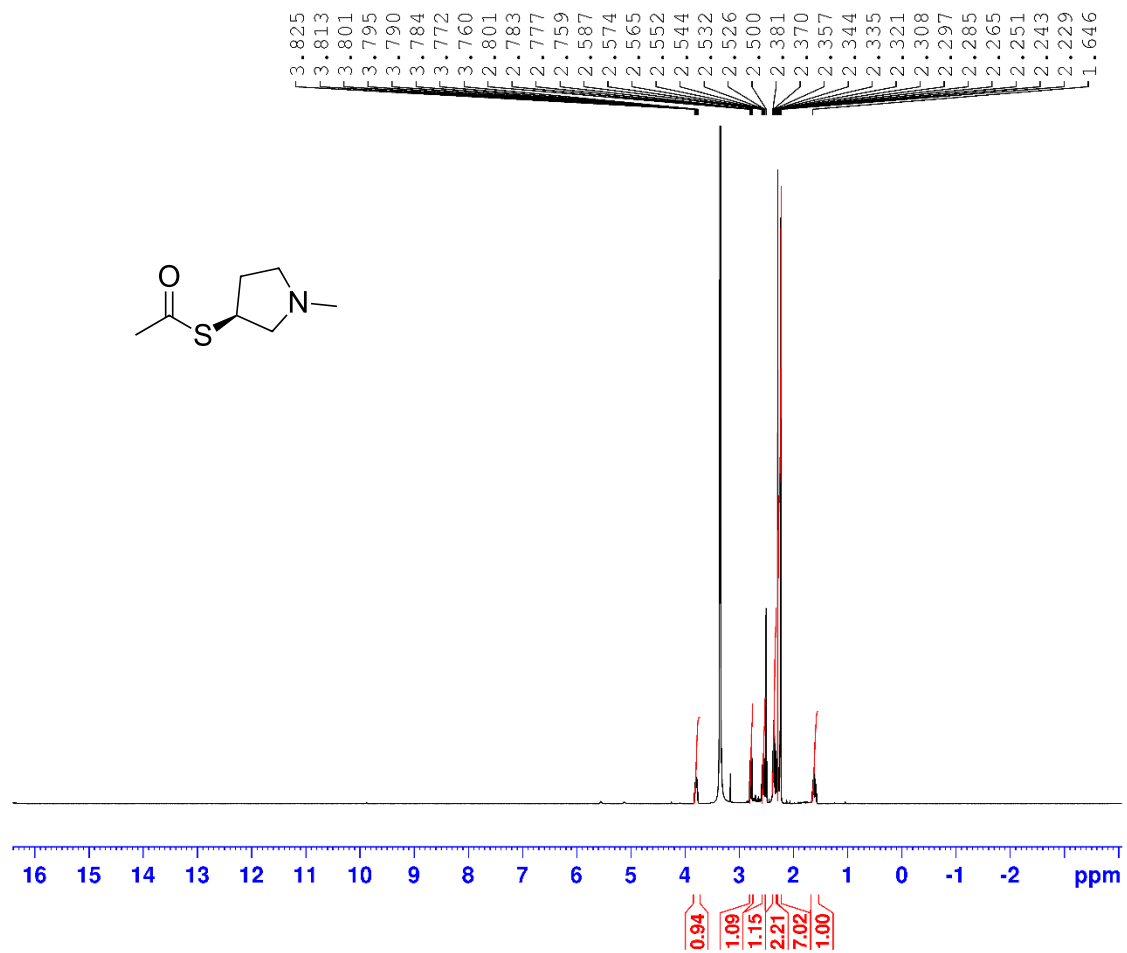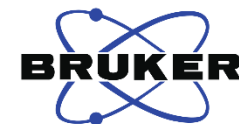

Current Data Parameters  
NAME MD-2-84 DMSO  
EXPNO 1  
PROCNO 1

F2 - Acquisition Parameters  
Date\_ 20220912  
Time 15.38 h  
INSTRUM AVN 400  
PROBHD Z163739 0038 {  
PULPROG zg30  
TD 65536  
SOLVENT DMSO  
NS 16  
DS 2  
SWH 8196.722 Hz  
FIDRES 0.250144 Hz  
AQ 3.9976959 sec  
RG 101  
DW 61.000 usec  
DE 13.55 usec  
TE 298.0 K  
D1 1.0000000 sec  
TDC 1  
SFO1 400.3024719 MHz  
NUC1 1H  
P0 3.33 usec  
P1 9.98 usec  
PLW1 14.13000011 W

F2 - Processing parameters  
SI 65536  
SF 400.3000027 MHz  
WDW EM  
SSB 0  
LB 0.30 Hz  
GB 0  
PC 1.00

(15) (3S)-S-(1-Methylpyrrolidin-3-yl) Ethanethioate <sup>13</sup>C NMR 100 MHz (DMSO-d<sub>6</sub>)

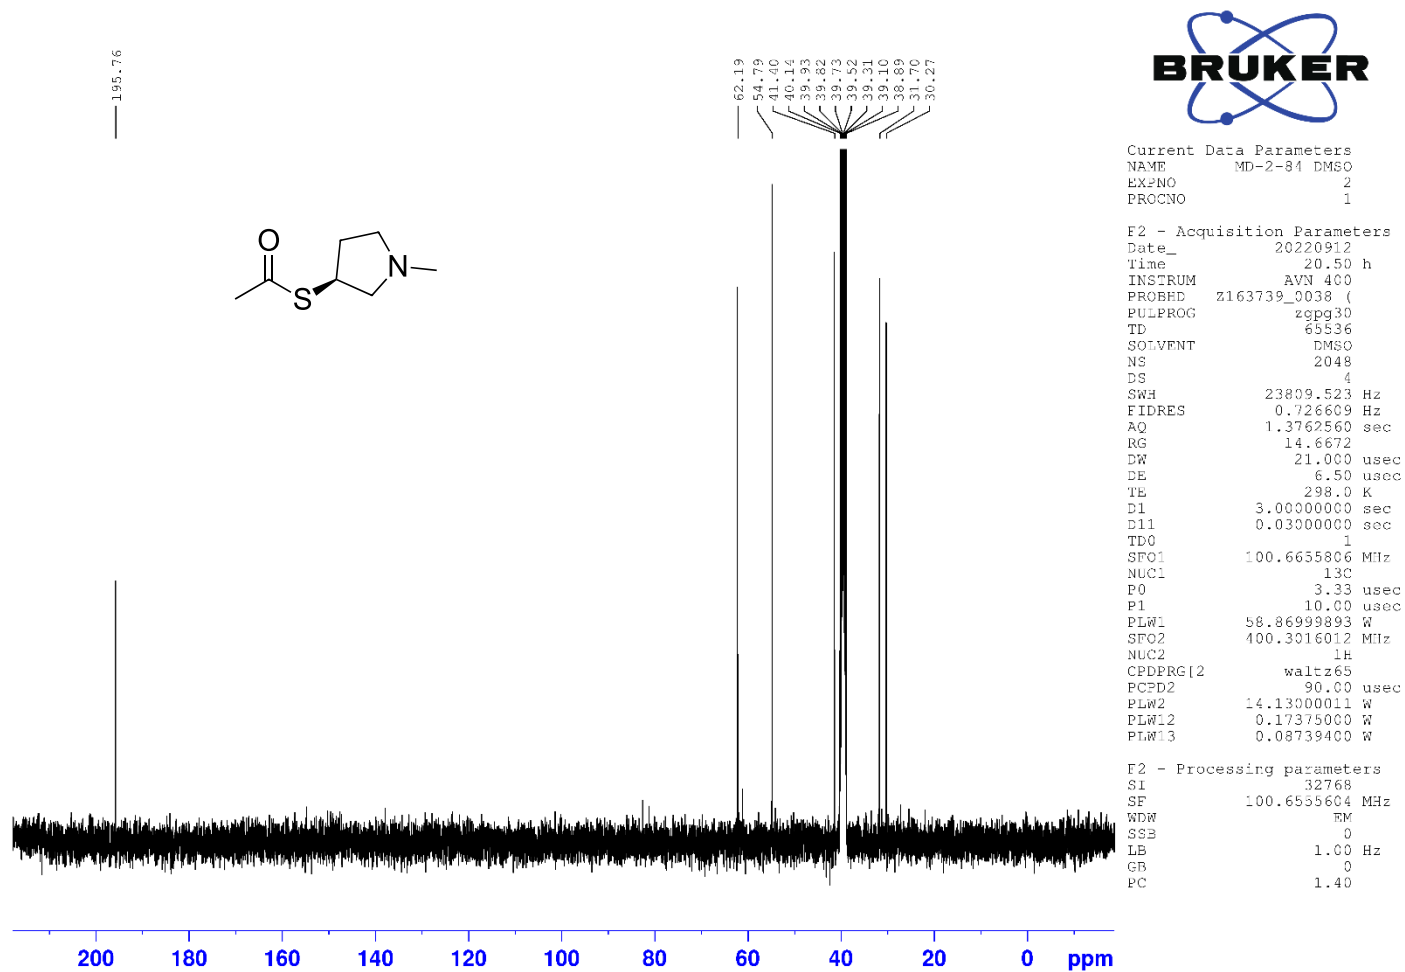

(15) (3S)-S-(1-Methylpyrrolidin-3-yl) Ethanethioate High Resolution Mass Spectrum (ESI, positive mode)

### Mass Spectrum SmartFormula Report

**Analysis Info**

Analysis Name D:\Data\Xiao\Aug 11 2022\000018.d  
Method Xiao all 1.m  
Sample Name TRV-6019  
Comment

Acquisition Date 2022-08-11 3:24:25 PM  
Operator x  
Instrument compact 8255754.20059

**Acquisition Parameter**

|             |            |                      |          |                  |           |
|-------------|------------|----------------------|----------|------------------|-----------|
| Source Type | ESI        | Ion Polarity         | Positive | Set Nebulizer    | 0.5 Bar   |
| Focus       | Not active | Set Capillary        | 3500 V   | Set Dry Heater   | 181 °C    |
| Scan Begin  | 50 m/z     | Set End Plate Offset | -500 V   | Set Dry Gas      | 4.0 l/min |
| Scan End    | 1500 m/z   | Set Charging Voltage | 2000 V   | Set Divert Valve | Source    |
|             |            | Set Corona           | 0 nA     | Set APCI Heater  | 0 °C      |

| Meas. m/z | Ion Formula | m/z      | err [ppm] |
|-----------|-------------|----------|-----------|
| 160.0793  | C7H14NOS    | 160.0791 | -1.5      |

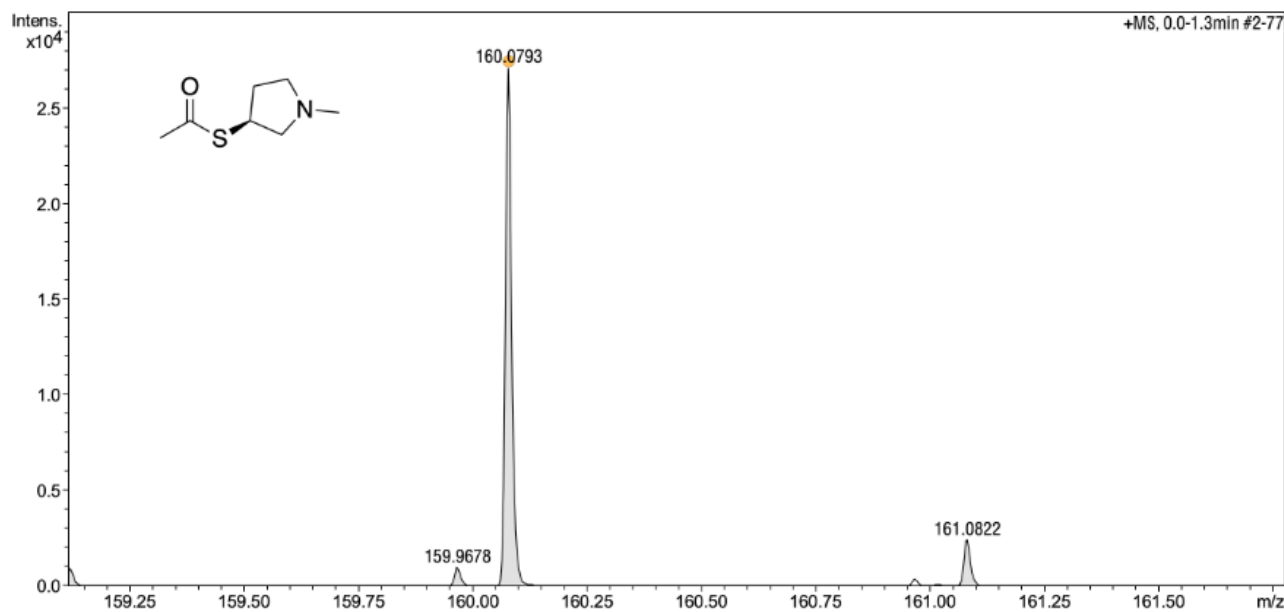

Aug 11 2022\000018.d

Bruker Compass DataAnalysis 4.3

printed: 2022-08-11 3:28:29 PM

by: x

Page 1 of 1

(15) (3*S*)-*S*-(1-Methylpyrrolidin-3-yl) Ethanethioate HPLC

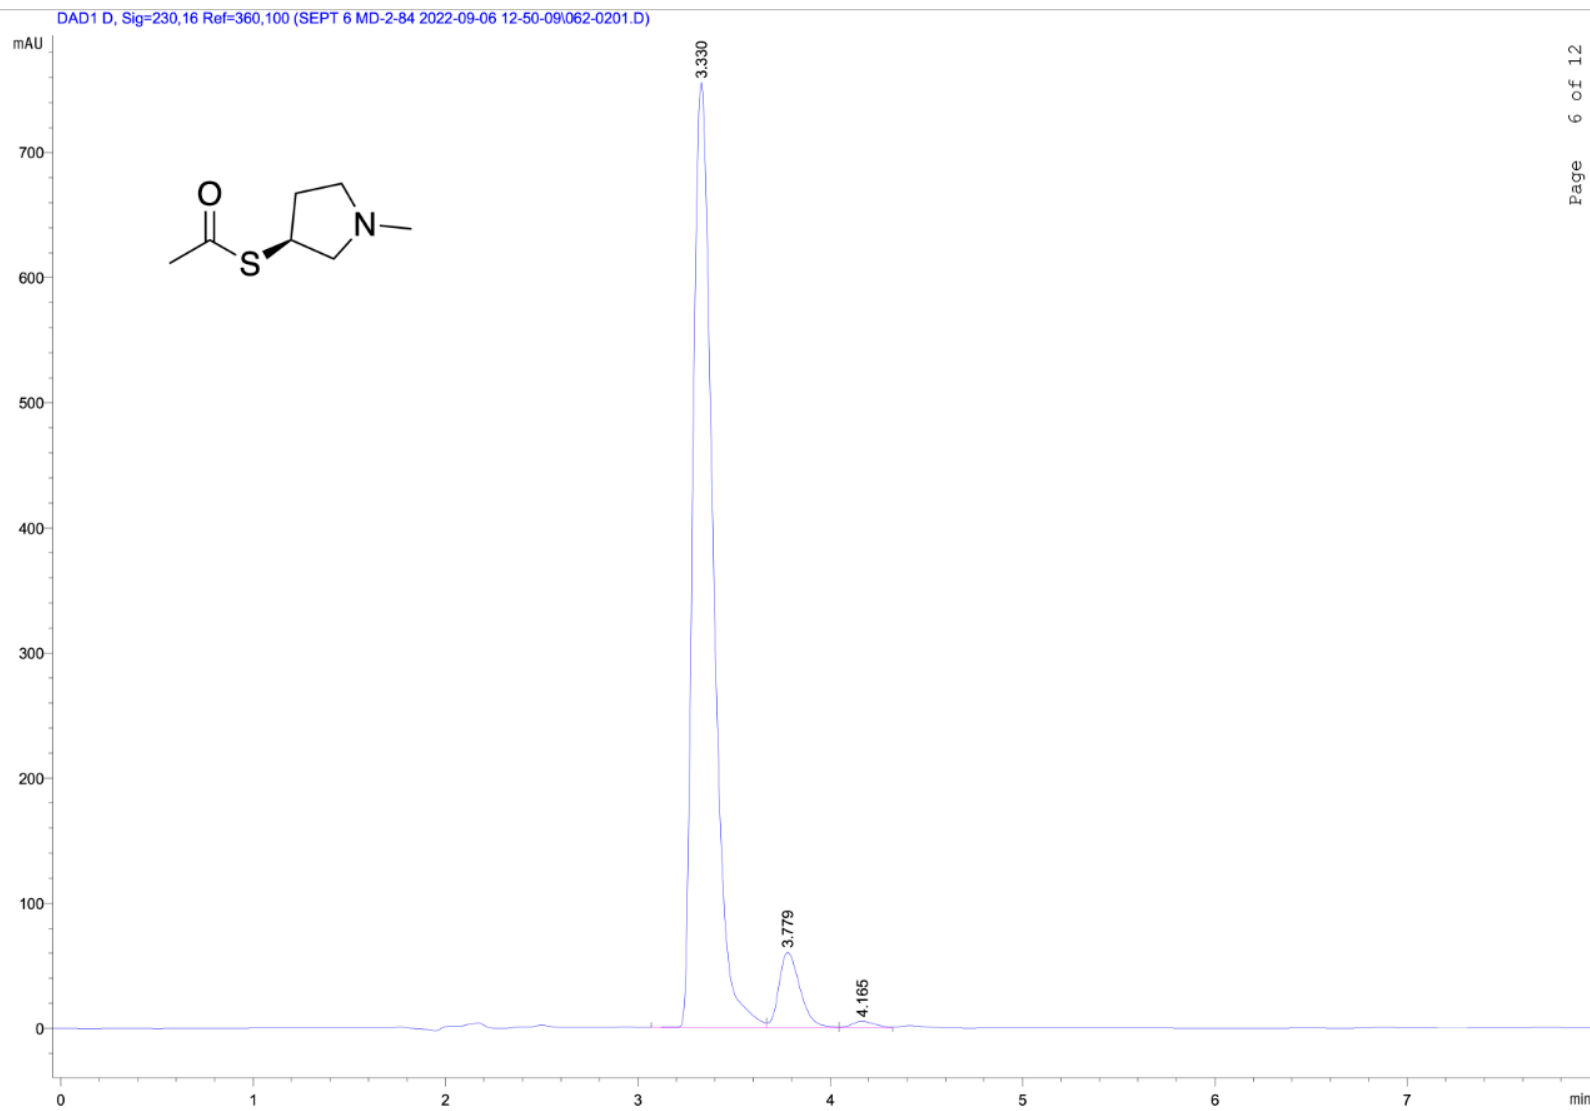



**(16) (3S)-3-Acetoxy-1-methyl-1-pyrrolidinium Chloride**

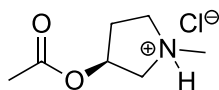

**Synthesis: (S)-1-Methyl-3-pyrrolidinyl acetate:** (S)-(+)-1-Methyl-3-pyrrolidinol (0.329 mL, 3 mmol) and triethylamine (1.05 mL, 7.5 mmol) were dissolved in anhydrous dichloromethane (10 mL) and cooled to 0°C with an ice bath. Acetyl chloride (0.213 mL, 3 mmol) was added dropwise at 0°C. The ice bath was removed after 5 mins, and the reaction was stirred for 6 hrs. The reaction was quenched with of brine (10 mL) and extracted with dichloromethane (3 × 15 mL). The combined organic layers were dried over Na<sub>2</sub>SO<sub>3</sub>, gravity filtered, and the filtrate was removed *in vacuo* to produce a yellow oil. The crude mixture was purified by silica gel column chromatography (5% MeOH/DCM) to produce (S)-1-methyl-3-pyrrolidinyl acetate (0.293 g, 68 %) as a yellow oil.

**Spectroscopic data:** <sup>1</sup>H NMR (400 MHz, DMSO-*d*<sub>6</sub>) δ 5.18-5.14 (m, 1H), 2.85-2.81 (m, 1H), 2.73 (dd, J = 10.9, 1.6 Hz, 1H), 2.57 (dd, J = 10.9, 5.9 Hz, 1H), 2.35 (s, 3H), 2.31-2.21 (m, 2H), 2.04 (s, 3H), 1.89-1.80 (1H); <sup>13</sup>C NMR (100.7 MHz, DMSO-*d*<sub>6</sub>) δ 171.1 (0), 74.8 (1), 62.3 (2), 55.1 (2), 42.1 (3), 32.7 (2), 21.4 (3).

**(3S)-3-Acetoxy-1-methyl-1-pyrrolidinium chloride:** To a flask charged with (S)-1-Methyl-3-pyrrolidinyl acetate (0.124 g, 0.867 mmol) anhydrous diethyl ether was added until complete dissolution (17 mL) under an argon atmosphere. HCl in diethyl ether (1 N solution, 1.3 mL, 1.3 mmol) was added dropwise and stirred for 1 hr. The solvent was removed *in vacuo* resulting in a white solid. The compound was triturated three times with diethyl ether (20 mL), solvent was

removed with a pipet and compound placed under vacuum (1 mm Hg) to produce (3*S*)-3-acetoxy-1-methyl-1-pyrrolidinium chloride (0.141 g, 90%) as a white solid.

*Spectroscopic data:* IR(ATR): 3380, 2921, 2650, 2458, 1717, 1241, 1047  $\text{cm}^{-1}$ ;  $^1\text{H}$  NMR (400 MHz,  $\text{CD}_3\text{OD}$ )  $\delta$  5.41-5.37 (m, 1H), 4.85 (br s, 2H), 3.67-3.55 (m, 2H), 3.42-3.38 (m, 1H), 2.98 (s, 3H), 2.58-2.47 (m, 1H), 2.25-2.17 (m, 1H), 2.09 (s, 3H);  $^{13}\text{C}$  NMR (100.7 MHz,  $\text{DMSO-}d_6$ )  $\delta$  171.7 (0), 73.8 (1), 61.7 (2), 55.5 (2), 41.9 (3), 31.7 (2), 20.8 (3); LRMS ( $\text{ESI}^+$ ): 144.1 ( $\text{M}^+$ ); HRMS ( $\text{ESI}^+$ ): calculated for  $\text{C}_7\text{H}_{14}\text{NO}_2^+$ : 144.1019 amu; found for  $\text{C}_7\text{H}_{14}\text{INO}_2^+$ : 144.1022 amu; HPLC purity at 210nm (75%  $\text{CH}_3\text{CN}$  : 10%  $\text{CH}_3\text{OH}$  : 15% aqueous triethylamine [0.1% triethylamine in  $\text{H}_2\text{O}$ ], retention time 3.066 mins): >99 %.

(16) (3*S*)-3-Acetoxy-1-methyl-1-pyrrolidinium Chloride IR(ATR)

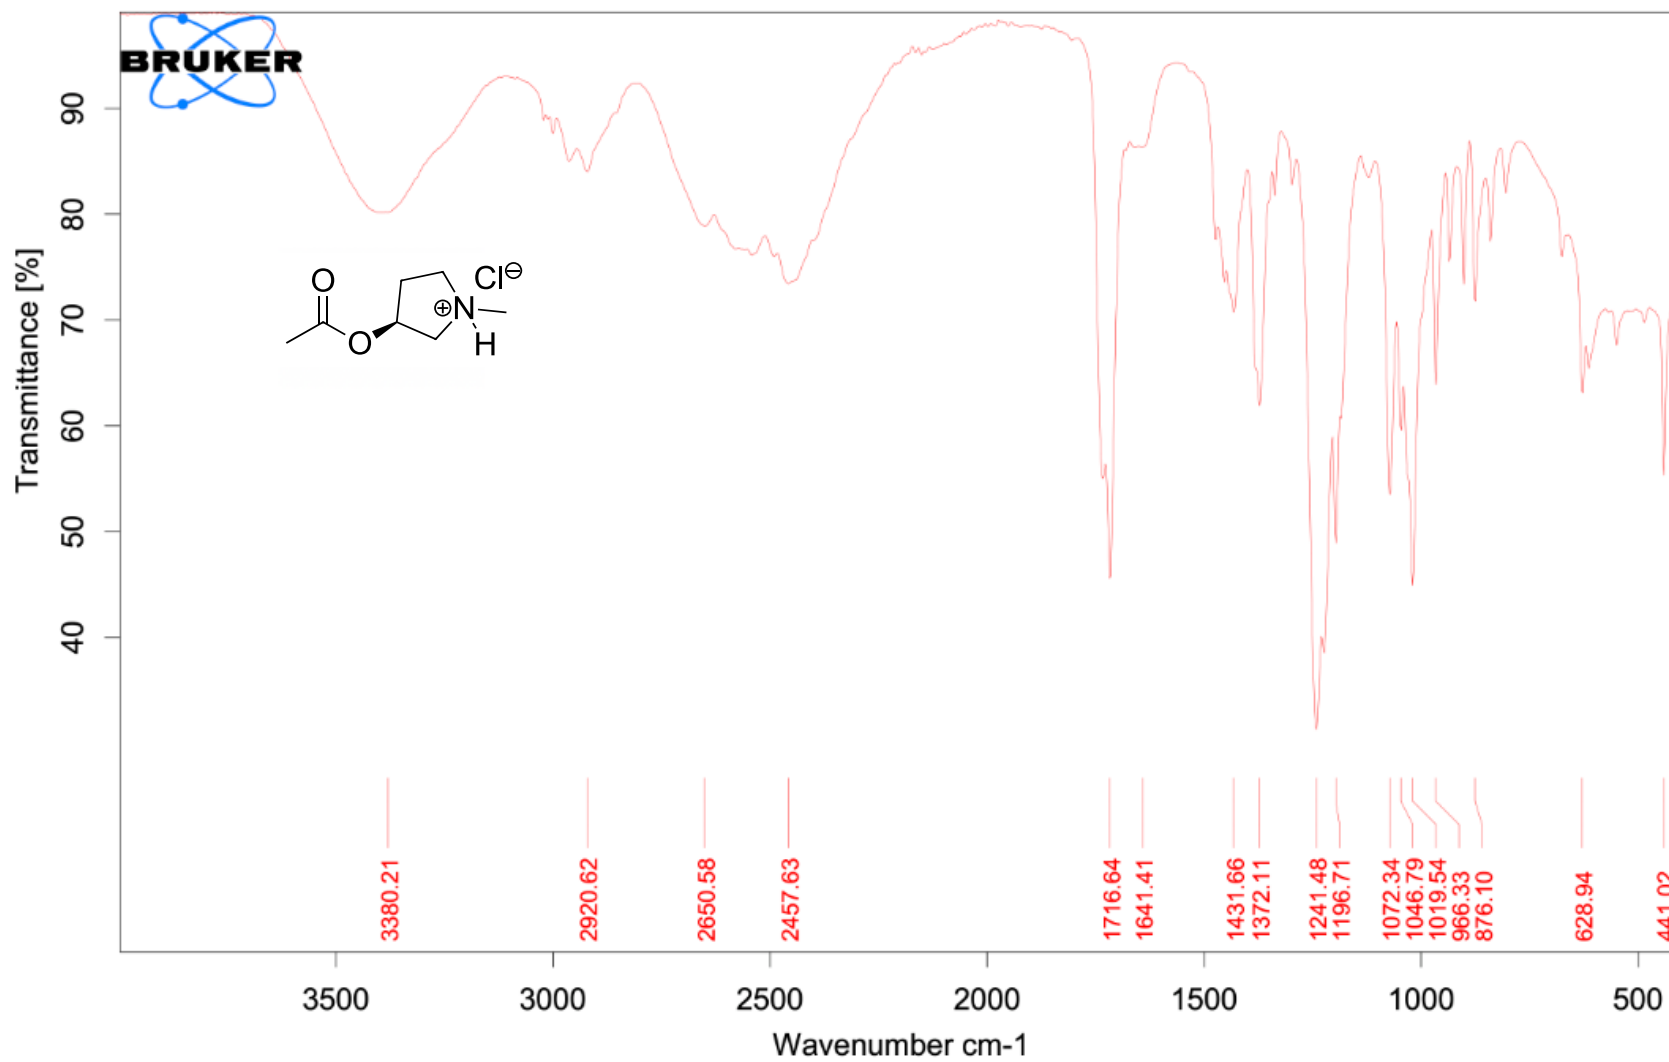

(16) (3S)-3-Acetoxy-1-methyl-1-pyrrolidinium Chloride <sup>1</sup>H NMR 400 MHz (CD<sub>3</sub>OD-*d*<sub>4</sub>)

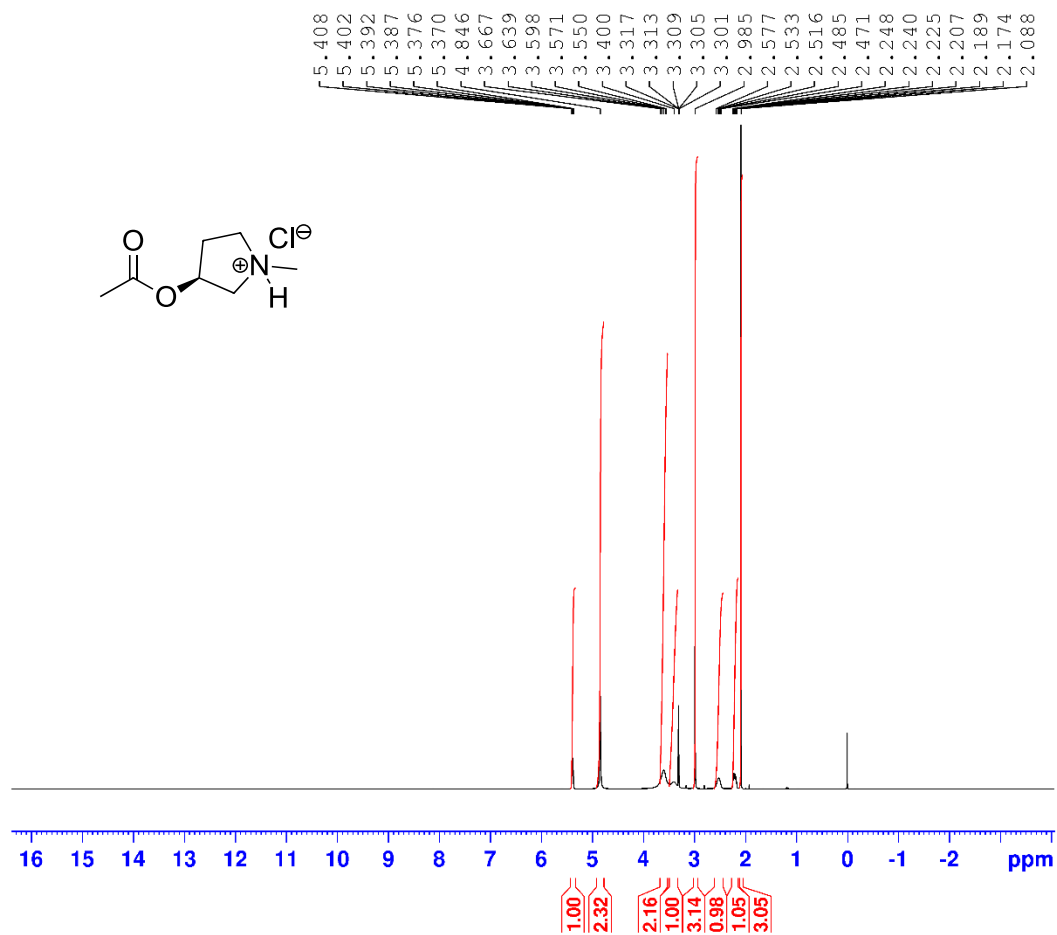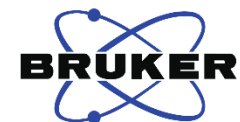

Current Data Parameters  
NAME SB 1 132  
EXPNO 8  
PROCNO 1

F2 - Acquisition Parameters  
Date\_ 20220815  
Time 16.14 h  
INSTRUM AVN 40C  
PROBHD Z163739.0038 ( )  
PULPROG zg30  
TD 65536  
SOLVENT MeOD  
NS 16  
DS 2  
SWH 8196.722 Hz  
FIDRES 0.250144 Hz  
AQ 3.9976959 sec  
RG 101  
DW 61.00C usec  
DE 13.63 usec  
TE 298.0 K  
D1 1.0000000 sec  
TD0 1  
SFO1 400.3024719 MHz  
NUC1 1H  
PC 3.16 usec  
PI 9.49 usec  
PLW1 14.13000011 W

F2 - Processing parameters  
SI 65536  
SF 400.3000081 MHz  
WDW EM  
SSB C  
LB 0.3C Hz  
GB C  
PC 1.0C

(16) (3S)-3-Acetoxy-1-methyl-1-pyrrolidinium Chloride  $^{13}\text{C}$  NMR 100 MHz ( $\text{CD}_3\text{OD}-d_4$ )

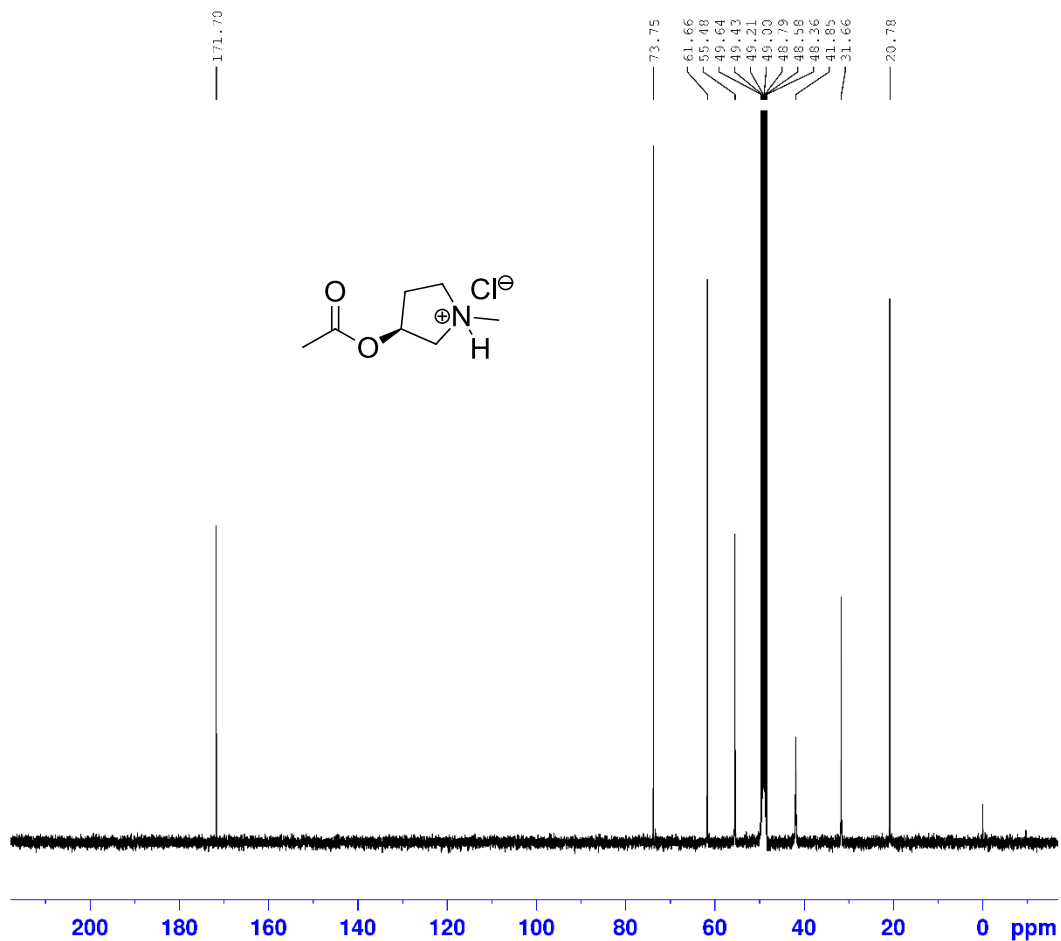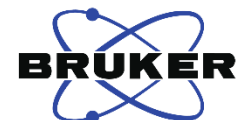

Current Data Parameters  
NAME SB-1-132  
EXPNO 9  
PROCNO 1

F2 - Acquisition Parameters  
Date\_ 20220815  
Time 22.00 h  
INSTRUM AVN 400  
PROBHD Z163739\_0038 ( )  
PULPROG zgpg30  
TD 65536  
SOLVENT MeOD  
NS 3072  
DS 4  
SWH 23809.523 Hz  
FIDRES 0.726609 Hz  
AQ 1.3762560 sec  
RG 37.4408  
DW 21.000 usec  
DE 6.50 usec  
TE 298.0 K  
D1 3.0000000 sec  
D11 0.0300000 sec  
TD0 1  
SFO1 100.6655806 MHz  
NUC1 13C  
P0 3.33 usec  
P1 10.00 usec  
PIW1 58.86999893 W  
SFO2 400.3016012 MHz  
NUC2 1H  
CPDPRG12 waltz65  
PCPD2 30.00 usec  
PLW2 14.13000011 W  
PIW12 0.15710001 W  
PLW13 0.07902300 W

F2 - Processing parameters  
SI 32768  
SF 100.6553746 MHz  
WDW EM  
SSB 0  
LB 1.00 Hz  
GB 0  
FC 1.40

(16) (3S)-3-Acetoxy-1-methyl-1-pyrrolidinium Chloride High Resolution Mass Spectrum (ESI, positive mode)

### Mass Spectrum SmartFormula Report

**Analysis Info**

Analysis Name D:\Data\Xiao\July 07 2022\000014.d  
Method Xiao all 1.m  
Sample Name TRV 6017 HCl  
Comment

Acquisition Date 7/7/2022 10:04:14 AM  
Operator x  
Instrument compact 8255754.20059

**Acquisition Parameter**

|             |            |                      |          |                  |           |
|-------------|------------|----------------------|----------|------------------|-----------|
| Source Type | ESI        | Ion Polarity         | Positive | Set Nebulizer    | 0.5 Bar   |
| Focus       | Not active | Set Capillary        | 3500 V   | Set Dry Heater   | 180 °C    |
| Scan Begin  | 50 m/z     | Set End Plate Offset | -500 V   | Set Dry Gas      | 4.0 l/min |
| Scan End    | 1500 m/z   | Set Charging Voltage | 2000 V   | Set Divert Valve | Source    |
|             |            | Set Corona           | 0 nA     | Set APCI Heater  | 0 °C      |

| Meas. m/z | Ion Formula | m/z      | err [ppm] |
|-----------|-------------|----------|-----------|
| 144.1022  | C7H14NO2    | 144.1019 | -2.0      |

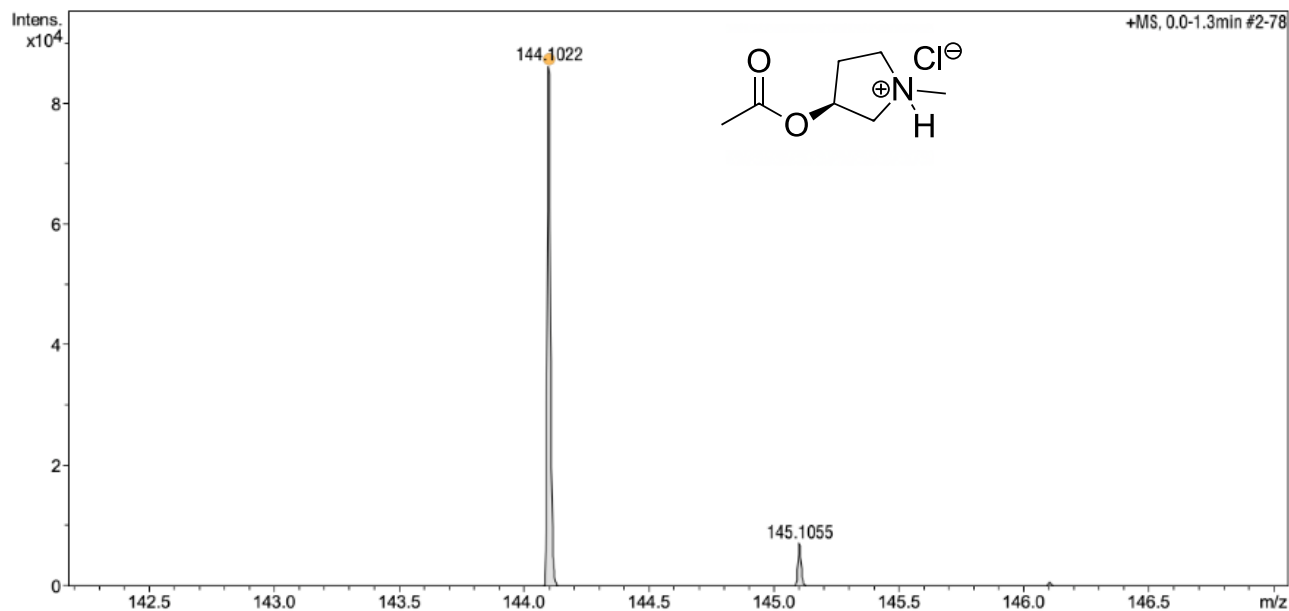

July 07 2022\000014.d

Bruker Compass DataAnalysis 4.3

printed: 7/7/2022 10:07:12 AM

by: x

Page 1 of 1

**(16)** (3*S*)-3-Acetoxy-1-methyl-1-pyrrolidinium Chloride HPLC. Note: Noise from the injection has a retention time from 1.6 min until 2.5 min. The compound of interest has a retention time of 3.066 min.

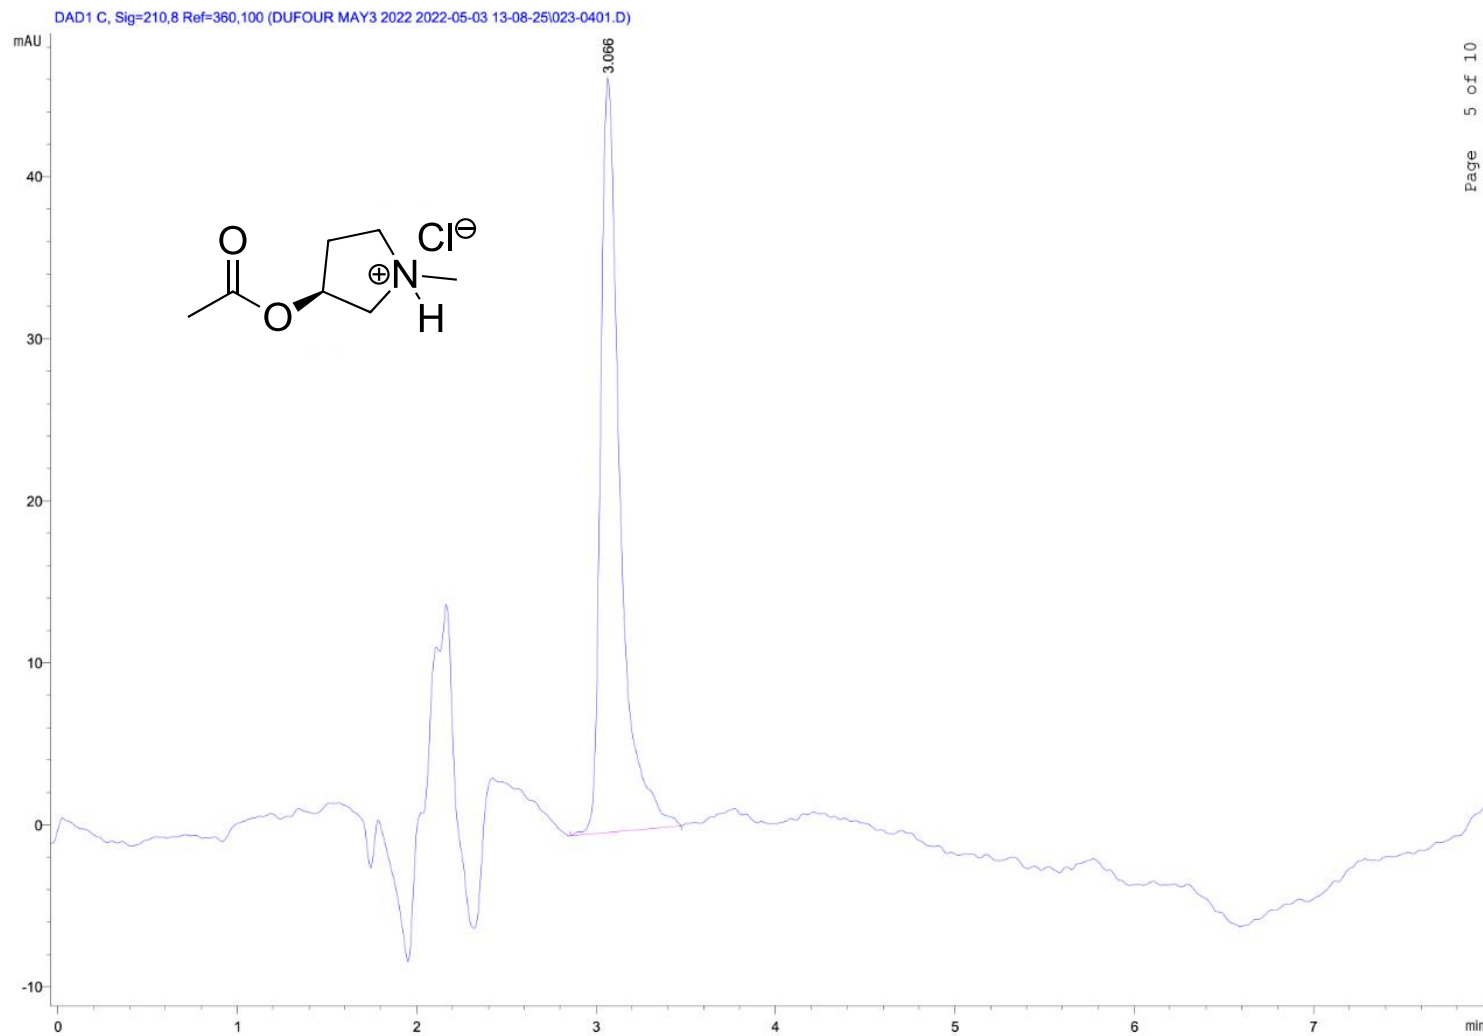

(17) (3R)-S-(1-Methylpyrrolidin-3-yl) Ethanethioate

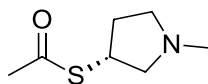

*Synthesis: (3R)-S-(1-methylpyrrolidin-3-yl) ethanethioate:* (3S)-(+)-1-Methyl-3-pyrrolidinol (6.00 mL, 54.6 mmol) was dissolved in dry dichloromethane (180 mL) and cooled in an ice bath. Triethylamine (11.4 mL, 81.9 mmol) was added dropwise. The mixture was stirred for 5 mins before the dropwise addition of methanesulfonyl chloride (4.90 mL, 62.6 mmol). The mixture was warmed slowly to room temperature and stirred for 16 hrs. The reaction was then quenched with the addition of brine (50 mL). The layers were separated, and the aqueous layer was back-extracted with dichloromethane (2 × 30 mL). The combined organics were washed with saturated  $\text{NaHCO}_3(\text{aq})$ , dried over  $\text{Na}_2\text{SO}_4$ , gravity filtered, and the filtrate was concentrated to afford 8.01 g (82% yield) of the labile mesylate as an oil, which was used immediately without purification. The crude mesylate (6.80 g, 38.0 mmol) was charged to a round-bottom flask. To this was added 18-crown-6 ether (15.1 g, 57.0 mmol), THF (125 mL), and then potassium thioacetate (6.50 g, 57.0 mmol) in one portion. The mixture was heated to reflux and stirred overnight for 16 hrs. After cooling to room temperature, the reaction was diluted with  $\text{H}_2\text{O}$  (60 mL) and extracted with ethyl acetate (3 x 60 mL). The combined organic layers were washed with saturated  $\text{NH}_4\text{Cl}(\text{aq})$ ,  $\text{H}_2\text{O}$  (3 × 60 mL), brine (60 mL), and dried with  $\text{Na}_2\text{SO}_4$ . The mixture was gravity filtered and the filtrate was concentrated to give 3.59 g of a purple oil. Vacuum distillation (heating at  $115^\circ\text{C}$  at 1 mmHg and collecting the distillate at  $74\text{-}76^\circ\text{C}$ ) afforded 2.43 g of an orange oil. This material was then dissolved in ethyl acetate and extracted with 1N HCl (2 x 15 mL). The combined aqueous extracts were basified by the dropwise addition of 2N  $\text{Na}_2\text{CO}_3(\text{aq})$  and then quickly extracted with dichloromethane (3 x 30 mL). The combined dichloromethane



extracts were washed with brine, dried ( $\text{Na}_2\text{SO}_4$ ), gravity filtered, and the filtrate was concentrated *in vacuo* to give 1.57 g of a yellow oil. This material was dissolved in *i*-PrOH (100 mL) and treated with oxalic acid (0.875 g, 9.72 mmol). After stirring for 2 hrs, the thick white precipitate was collected by filtration, washing with *i*-PrOH (50 mL). The crude solid was then recrystallized from *i*-PrOH to give 1.85 g of a yellowish solid, which was immediately treated with 50 mL of saturated  $\text{NaHCO}_3(\text{aq})$  and then extracted with DCM (3 x 60 mL). The combined organic extracts were washed with brine, dried ( $\text{Na}_2\text{SO}_4$ ), filtered and concentrated to give (3*R*)-*S*-(1-methylpyrrolidin-3-yl) ethanethioate (0.985 g, 16% yield) as a yellow viscous liquid.

*Spectroscopic data:* IR(ATR) 2962, 2941, 2774, 1685, 1116, 629  $\text{cm}^{-1}$ ;  $^1\text{H}$  NMR (400 MHz,  $\text{CDCl}_3$ )  $\delta$  3.95-3.88 (m, 1H), 2.87 (dd,  $J = 10.1, 7.1$  Hz, 1H), 2.71-2.64 (m, 1H), 2.51 (dd,  $J = 10.1, 4.6$  Hz, 1H), 2.44-2.36 (m, 2H), 2.34 (s, 3H), 2.29 (s, 3H), 1.78-1.71 (m, 1H);  $^{13}\text{C}$  NMR (100.7 MHz,  $\text{CD}_3\text{OD}-d_4$ )  $\delta$  196.5 (0), 63.0 (2), 55.6 (2), 42.0 (3), 40.5(1), 32.1 (2), 30.5 (3); LRMS ( $\text{ESI}^+$ ): 160.1 ( $\text{M}^+$ ); HRMS ( $\text{ESI}^+$ ): calculated for  $\text{C}_7\text{H}_{14}\text{NOS}^+$ : 160.0791 amu; found for  $\text{C}_7\text{H}_{14}\text{NOS}^+$ : 160.0788 amu; HPLC purity at 230 nm (25%  $\text{CH}_3\text{CN}$  : 75%  $\text{CH}_3\text{OH}$ , retention time: 3.323 mins): 95%.

(17) (3R)-S-(1-Methylpyrrolidin-3-yl) Ethanethioate IR(ATR)

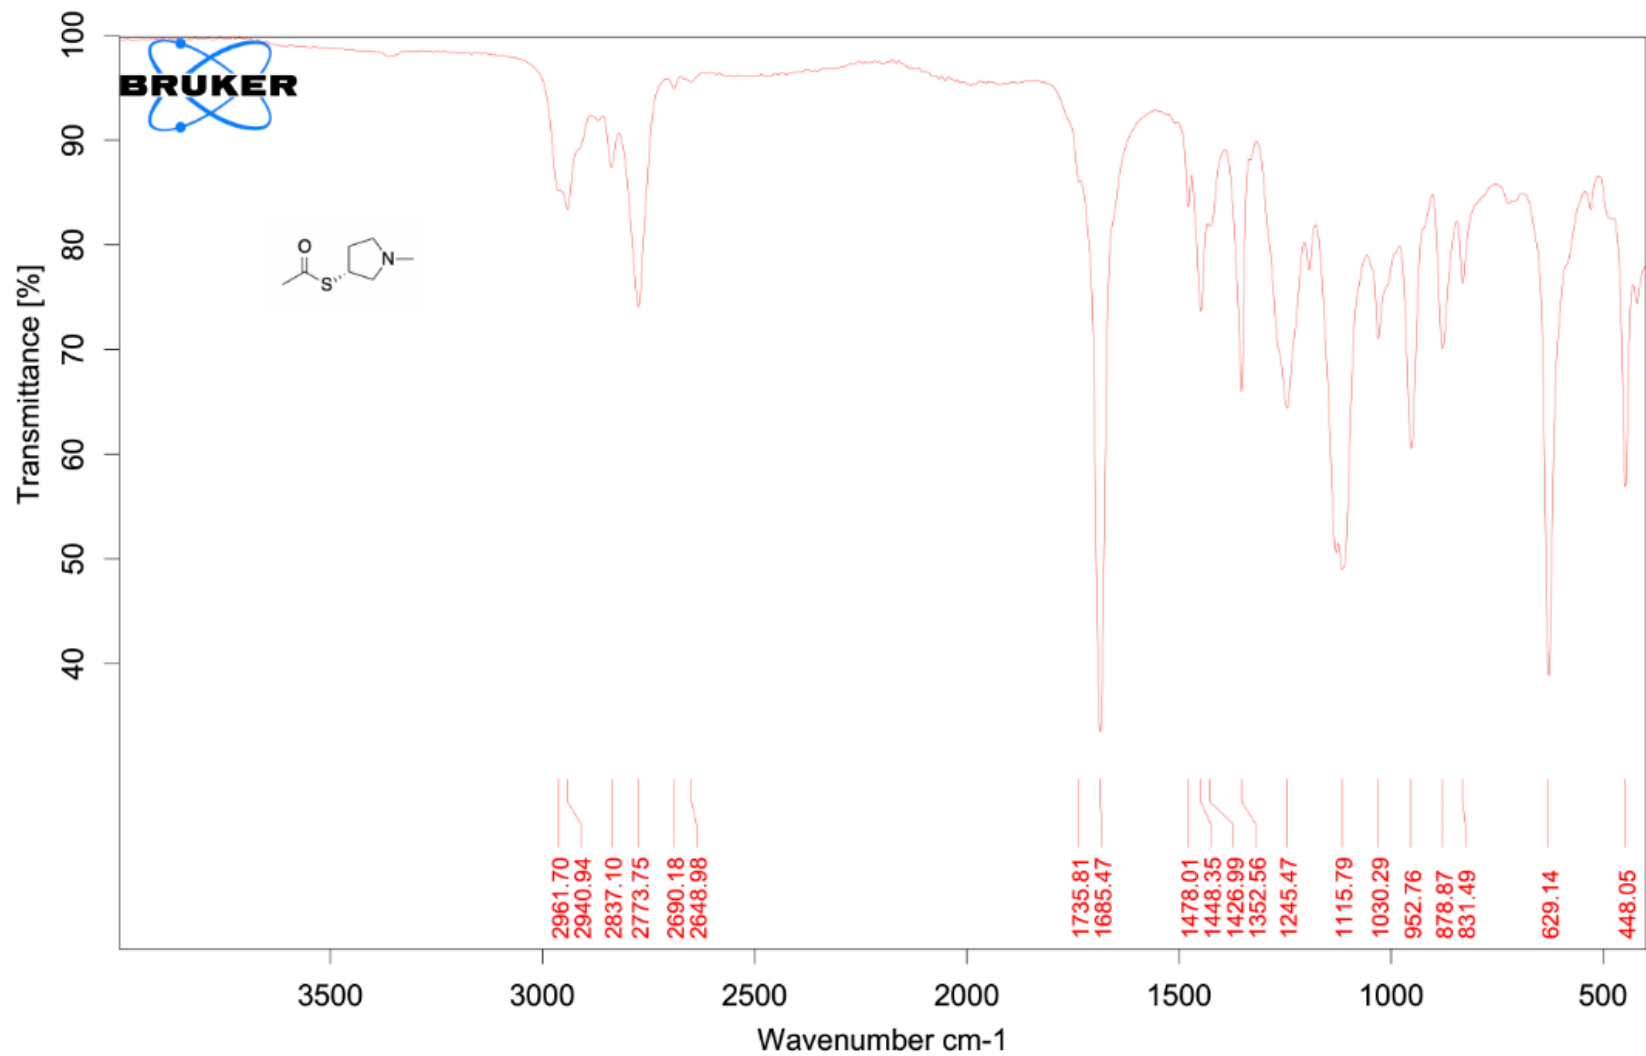

(17) (3R)-S-(1-Methylpyrrolidin-3-yl) Ethanethioate <sup>1</sup>H NMR 400 MHz (CDCl<sub>3</sub>)

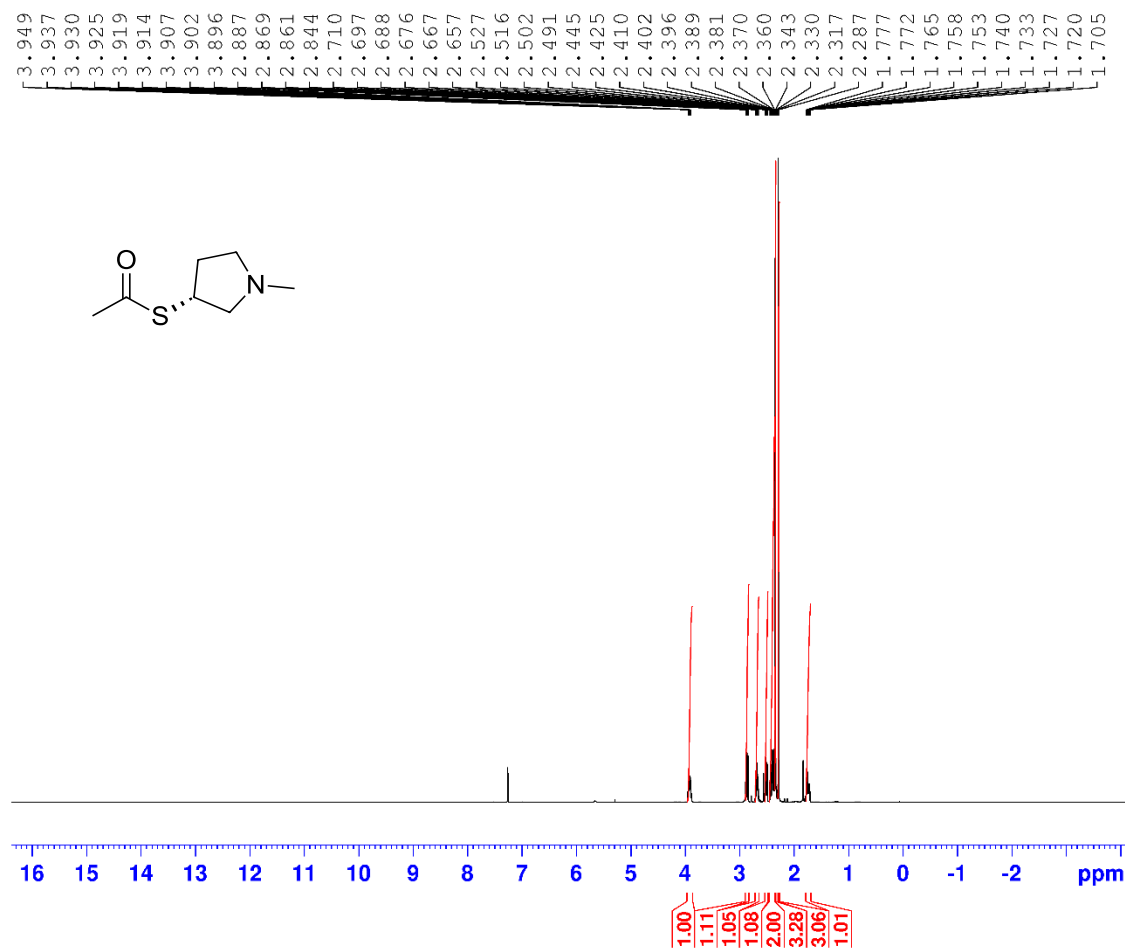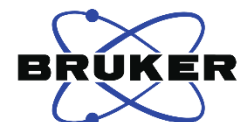

Current Data Parameters  
 NAME SB-1-135  
 EXPNO 3  
 PROCNO 1

F2 - Acquisition Parameters  
 Date\_ 20220830  
 Time 14.37 h  
 INSTRUM AVN 400  
 PROBHD Z163739\_0038 ( zq30  
 PULPROG zg30  
 TD 65536  
 SOLVENT CDCl3  
 NS 16  
 DS 2  
 SWH 8196.722 Hz  
 FIDRES 0.250144 Hz  
 AQ 3.9976959 sec  
 RG 101  
 DW 61.000 usec  
 DE 13.55 usec  
 TE 298.0 K  
 D1 1.00000000 sec  
 TDO 1  
 SFO1 400.3024719 MHz  
 NUC1 1H  
 PO 3.33 usec  
 P1 9.98 usec  
 PLW1 14.1300011 w

F2 - Processing parameters  
 SI 65536  
 SF 400.3000107 MHz  
 WDW EM  
 SSB 0  
 LB 0.30 Hz  
 GB 0  
 PC 1.00

(17) (3R)-S-(1-Methylpyrrolidin-3-yl) Ethanethioate <sup>13</sup>C NMR 100 MHz (CDCl<sub>3</sub>)

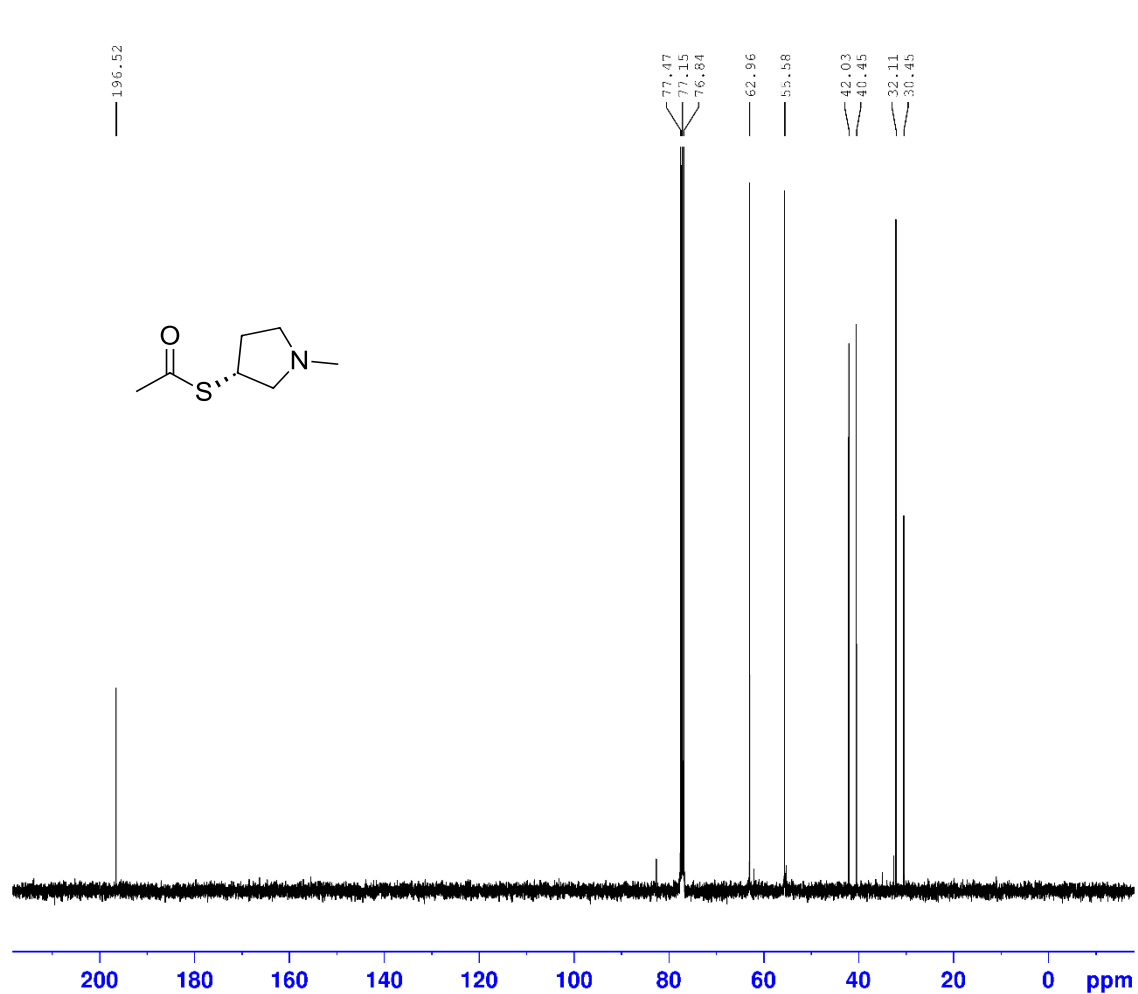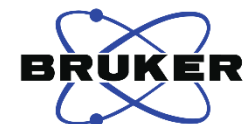

Current Data Parameters  
NAME SB-1-135  
EXPNO 4  
PROCNO 1

F2 - Acquisition Parameters  
Date\_ 20220830  
Time 22.10 h  
INSTRUM AVN 400  
PROBHD Z163739\_0038 {  
PULPROG zgpg30  
TD 65536  
SOLVENT CDCl3  
NS 4096  
DS 4  
SWH 23809.523 Hz  
FIDRES 0.726609 Hz  
AQ 1.3762560 sec  
RG 9.25165  
DW 21.000 usec  
DE 6.50 usec  
TE 298.0 K  
D1 2.0000000 sec  
D11 0.0300000 sec  
TD0 1  
SFO1 100.6655606 MHz  
NUC1 13C  
PC 3.33 usec  
P1 10.00 usec  
PLW1 58.86999893 W  
SFO2 400.3016012 MHz  
NUC2 1H  
CPDPRG2 waltz65  
PCPD2 90.00 usec  
PLW2 14.13000011 W  
PLW12 0.17375000 W  
PLW13 0.08739400 W

F2 - Processing parameters  
SI 32768  
SF 100.6555027 MHz  
WDW EM  
SSB 0  
LB 1.00 Hz  
GB 0  
PC 1.40

(17) (3R)-S-(1-Methylpyrrolidin-3-yl) Ethanethioate High Resolution Mass Spectrum (ESI, positive mode)

### Mass Spectrum SmartFormula Report

**Analysis Info**

Analysis Name D:\Data\Xiao\Oct 14 2022\000001.d  
Method Xiao all 1.m  
Sample Name TRV 6020  
Comment

Acquisition Date 2022-10-14 10:19:36 AM  
Operator x  
Instrument compact 8255754.20059

**Acquisition Parameter**

|             |            |                      |          |                  |           |
|-------------|------------|----------------------|----------|------------------|-----------|
| Source Type | ESI        | Ion Polarity         | Positive | Set Nebulizer    | 0.5 Bar   |
| Focus       | Not active | Set Capillary        | 3500 V   | Set Dry Heater   | 181 °C    |
| Scan Begin  | 50 m/z     | Set End Plate Offset | -500 V   | Set Dry Gas      | 4.0 l/min |
| Scan End    | 1500 m/z   | Set Charging Voltage | 2000 V   | Set Divert Valve | Source    |
|             |            | Set Corona           | 0 nA     | Set APCI Heater  | 0 °C      |

| Meas. m/z | Ion Formula | m/z      | err [ppm] |
|-----------|-------------|----------|-----------|
| 160.0788  | C7H14NOS    | 160.0791 | 1.4       |

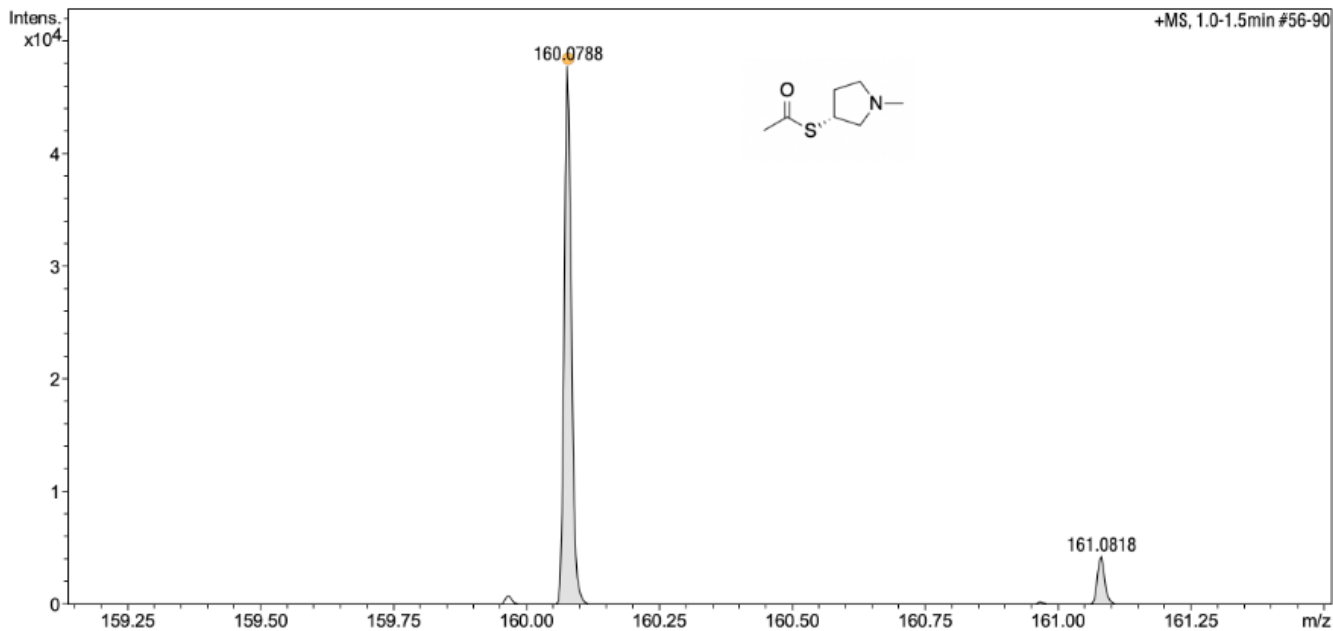

(17) (3R)-S-(1-Methylpyrrolidin-3-yl) Ethanethioate HPLC

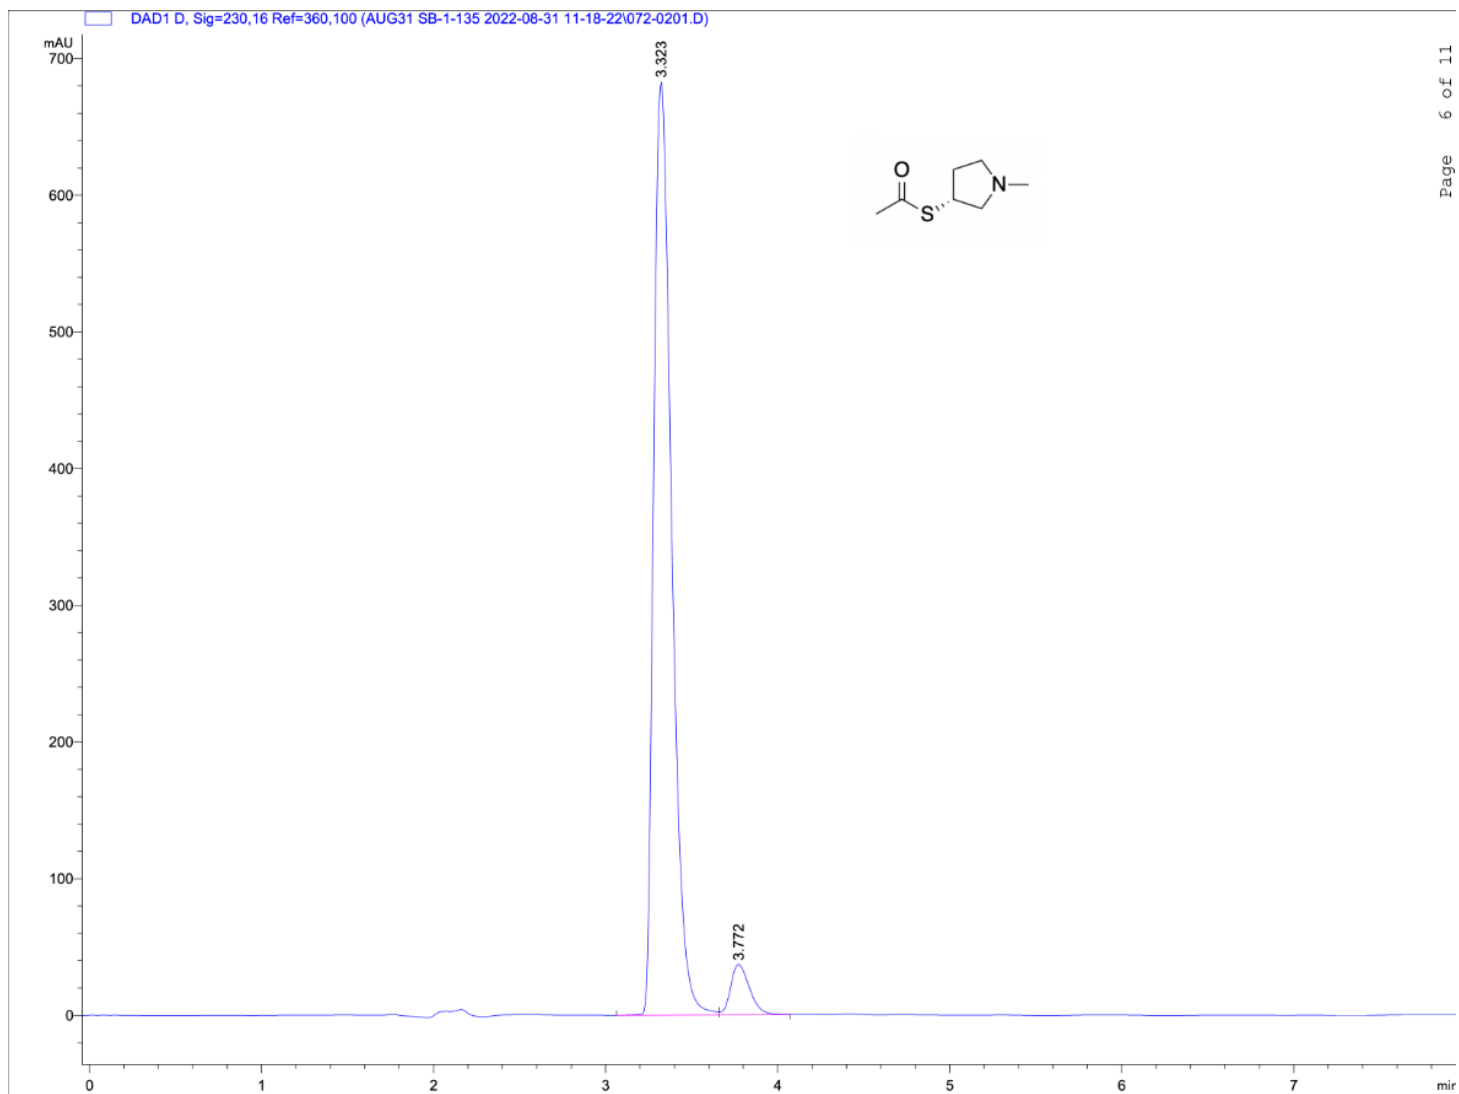

**(18) (3R)-3-Acetoxy-1-methyl-1-pyrrolidinium Chloride**

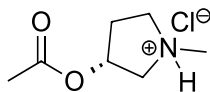

**Synthesis: (3R)-1-Methyl-3-pyrrolidinyl acetate:** (3R)-(-)-1-Methyl-3-pyrrolidinol (0.549 mL, 5.00 mmol) and triethylamine (1.74 mL, 12.5 mmol) were dissolved in anhydrous dichloromethane (17 mL) and cooled to 0°C with an ice bath. Acetyl chloride (0.356 mL, 5.00 mmol) was added dropwise at 0°C. The ice bath was removed after 5 min, and the reaction was stirred for 3 hrs. The reaction was quenched with 20 mL of brine, extracted with DCM (3×15 mL) and dried over Na<sub>2</sub>SO<sub>3</sub>. After gravity filtration of the drying agent, the solvent was removed *in vacuo* to produce a yellow oil. The crude mixture was purified by silica gel column chromatography (5% MeOH/DCM) to produce (3R)-1-methyl-3-pyrrolidinyl acetate (0.227 g, 32%) as a yellow oil.

**Spectroscopic data:** IR(ATR) 2944, 2839, 2780, 1735, 1236, 887cm<sup>-1</sup>; <sup>1</sup>H NMR (400 MHz, CDCl<sub>3</sub>) δ 5.21-5.16 (m, 1H), 2.89-2.84 (m, 1H), 2.73 (d, J = 10.6 Hz, 1H), 2.58 (dd, J = 10.9, 5.9 Hz, 1H), 2.36 (s, 3H), 2.30-2.23 (m, 2H), 2.04 (s, 3H), 1.89-1.83 (m, 1H); <sup>13</sup>C NMR (100.7 MHz, CDCl<sub>3</sub>) δ 171.2 (0), 74.8 (1), 62.3 (2), 55.1 (2), 42.1 (3), 32.7 (2), 21.4 (3); HRMS (ESI<sup>+</sup>): calculated for C<sub>7</sub>H<sub>14</sub>NO<sub>2</sub><sup>+</sup>: 144.1019 amu; found for C<sub>7</sub>H<sub>14</sub>NO<sub>2</sub><sup>+</sup>: 144.1019 amu; HPLC purity at 200 nm (25% CH<sub>3</sub>CN : 75% CH<sub>3</sub>OH, retention time: 3.09 mins): >99%.

**(3R)-3-Acetoxy-1-methyl-1-pyrrolidinium Chloride:** To a flask charged with (3R)-1-methyl-3-pyrrolidinyl acetate (0.122 g, 0.85 mmol) anhydrous diethyl ether was added until complete dissolution (17 mL) under an argon atmosphere. HCl in diethyl ether (1 N - 1.28 mL, 1.28 mmol) was added dropwise and stirred for 1hr. The solvent was removed *in vacuo* resulting in a white

solid. The compound was triturated with diethyl ether (20 mL), and the solvent was removed with a pipet. This process was repeated two more times. The compound was dried *in vacuo* to produce (3*R*)-3-acetoxy-1-methyl-1-pyrrolidinium chloride (0.146 g, 96%).

*Spectroscopic data:* MP<sub>(diethyl ether)</sub>: 90-93°C; IR(ATR) 2915, 2647, 2440, 1717, 1246, 1224, 967 cm<sup>-1</sup>; <sup>1</sup>H NMR (400 MHz, CD<sub>3</sub>OD-*d*4) δ 5.41-5.37 (m, 1H), 3.60 (app br s, 3H), 3.40 (app br s, 1H), 2.98 (s, 3H), 2.57-2.48 (m, 1H), 2.25-2.17 (m, 1H), 2.09 (s, 3H); <sup>13</sup>C NMR (100.7 MHz, CD<sub>3</sub>OD-*d*4) δ 171.7 (0), 73.8 (1), 61.7 (2), 55.5 (2), 41.9 (3), 31.7 (2), 20.8 (3); LRMS (ESI<sup>+</sup>): 144.1 (M<sup>+</sup>); HRMS (ESI<sup>+</sup>): calculated for C<sub>7</sub>H<sub>14</sub>NO<sub>2</sub><sup>+</sup>: 144.1019 amu; found for C<sub>7</sub>H<sub>14</sub>NO<sub>2</sub><sup>+</sup>: 144.1018 amu; HPLC purity at 230 nm (25% CH<sub>3</sub>CN : 75% CH<sub>3</sub>OH, retention time: 3.097 mins): >99%.



(18) (3R)-3-Acetoxy-1-methyl-1-pyrrolidinium Chloride IR(ATR)

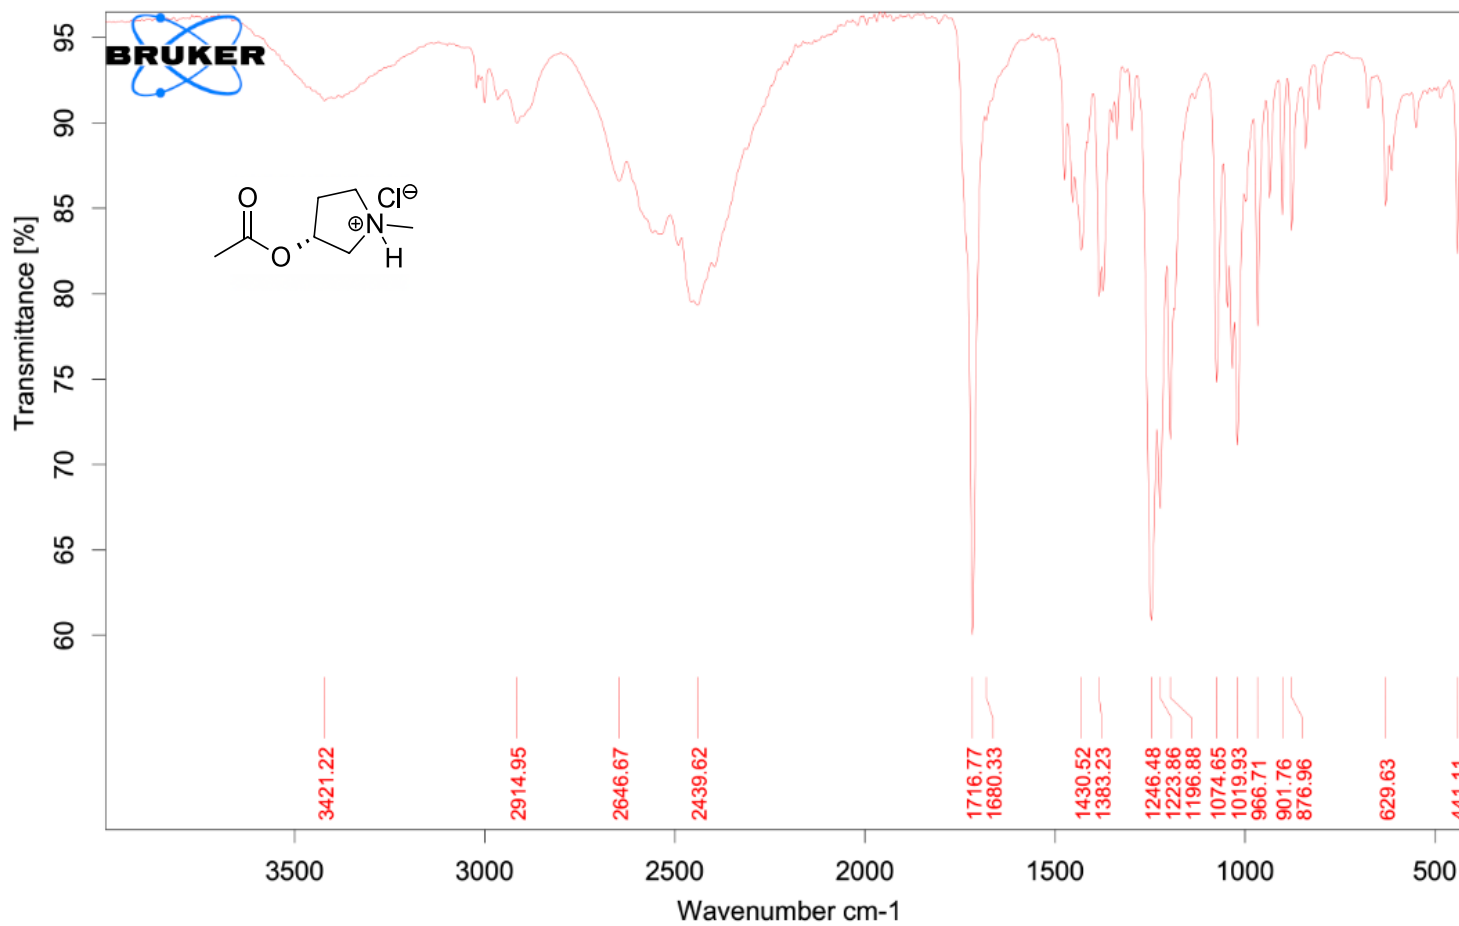

(18) (3R)-3-Acetoxy-1-methyl-1-pyrrolidinium Chloride <sup>1</sup>H NMR 400 MHz (CD<sub>3</sub>OD-*d*<sub>4</sub>)

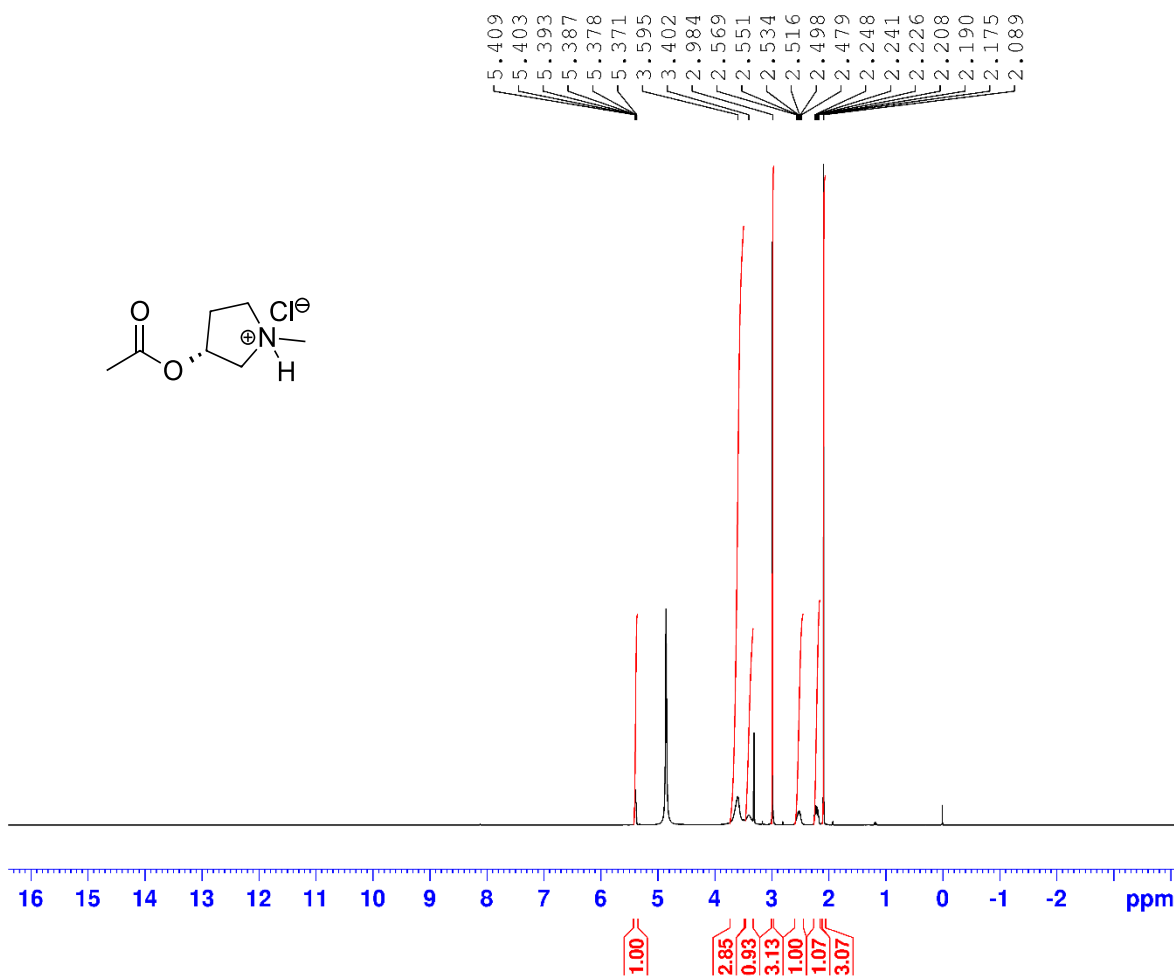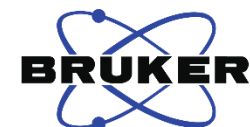

Current Data Parameters  
NAME MD-2-67 MeOD  
EXPNO 8  
PROCNO 1

F2 - Acquisition Parameters  
Date\_ 20220803  
Time 12.02 h  
INSTRUM AVN 400  
PROBHD Z163739\_0038 (  
PULPROG zg30  
TD 65536  
SOLVENT MeOD  
NS 16  
DS 2  
SWH 8196.722 Hz  
FIDRES 0.250144 Hz  
AQ 3.9976959 sec  
RG 101  
DW 61.000 usec  
DE 13.54 usec  
TE 298.0 K  
D1 1.00000000 sec  
TD0 1  
SFO1 400.3024719 MHz  
NUC1 1H  
PO 3.33 usec  
P1 10.00 usec  
PLW1 14.12800026 W

F2 - Processing parameters  
SI 65536  
SF 400.3000077 MHz  
WDW EM  
SSB 0  
LB 0.30 Hz  
GB 0  
PC 1.00

(18) (3R)-3-Acetoxy-1-methyl-1-pyrrolidinium Chloride <sup>13</sup>C NMR 100 MHz (CD<sub>3</sub>OD-d<sub>4</sub>)

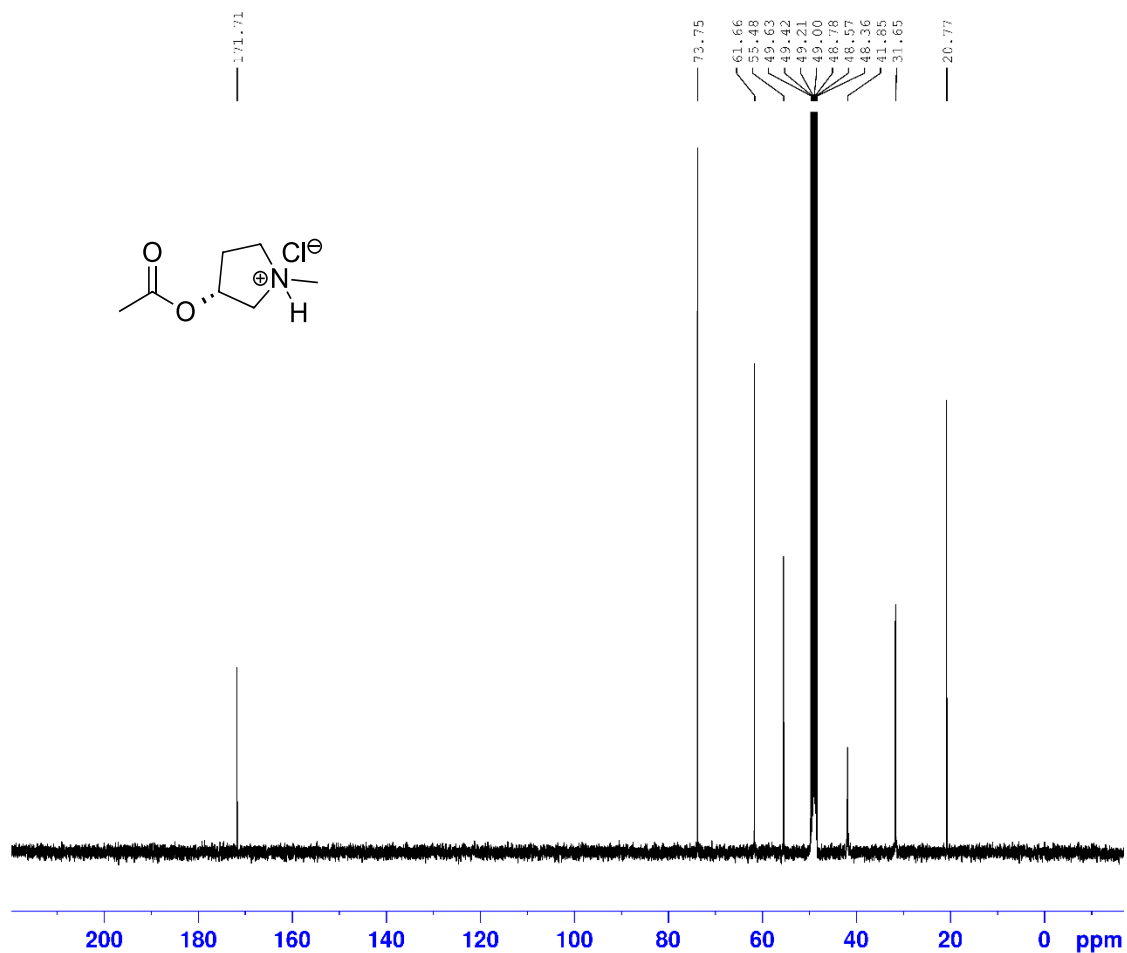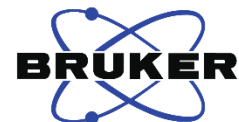

Current Data Parameters  
NAME MD-2-67 MeOD  
EXPNO 2  
PROCNO 1

F2 - Acquisition Parameters  
Date\_ 20220801  
Time 2.21 h  
INSTRUM AVN 400  
PROBHD Z163739\_0038 (  
PULPROG zgpg30  
TD 65536  
SOLVENT MeOD  
NS 2048  
DS 4  
SWH 23809.523 Hz  
FIDRES 0.726609 Hz  
AQ 1.3762560 sec  
RG 31.6504  
DW 21.000 usec  
DE 6.50 usec  
TE 298.0 K  
D1 3.0000000 sec  
D11 0.0300000 sec  
TD0 1  
SFO1 100.6655806 MHz  
NUC1 13C  
P0 3.33 usec  
P1 10.00 usec  
PLW1 58.86999893 W  
SFO2 400.3016012 MHz  
NUC2 1H  
CPDPRG2 waltz65  
PCPD2 90.00 usec  
PLW2 14.12800026 W  
PLW12 0.17442000 W  
PLW13 0.08773200 W

F2 - Processing parameters  
SI 32768  
SF 100.6553754 MHz  
WDW EM  
SSB 0  
LB 1.00 Hz  
GB 0  
FC 1.40

(18) (3R)-3-Acetoxy-1-methyl-1-pyrrolidinium Chloride High Resolution Mass Spectrum (ESI, positive mode)

### Mass Spectrum SmartFormula Report

**Analysis Info**

Analysis Name D:\Data\Xiao\July 06 2022\000010.d  
Method Xiao all 1.m  
Sample Name TRV 6018 HCl  
Comment

Acquisition Date 7/6/2022 2:53:34 PM  
Operator x  
Instrument compact 8255754.20059

**Acquisition Parameter**

|             |            |                      |          |                  |           |
|-------------|------------|----------------------|----------|------------------|-----------|
| Source Type | ESI        | Ion Polarity         | Positive | Set Nebulizer    | 0.5 Bar   |
| Focus       | Not active | Set Capillary        | 3500 V   | Set Dry Heater   | 181 °C    |
| Scan Begin  | 50 m/z     | Set End Plate Offset | -500 V   | Set Dry Gas      | 4.0 l/min |
| Scan End    | 1500 m/z   | Set Charging Voltage | 2000 V   | Set Divert Valve | Source    |
|             |            | Set Corona           | 0 nA     | Set APCI Heater  | 0 °C      |

| Meas. m/z | Ion Formula | m/z      | err [ppm] |
|-----------|-------------|----------|-----------|
| 144.1018  | C7H14NO2    | 144.1019 | 0.6       |

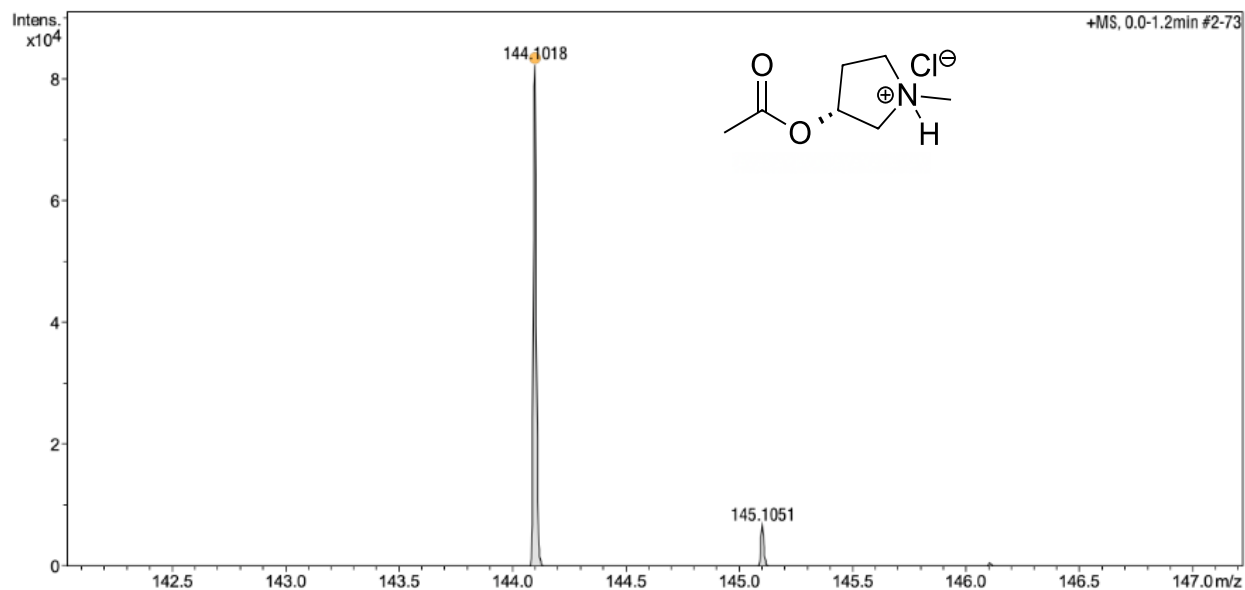

July 06 2022\000010.d

Bruker Compass DataAnalysis 4.3

printed: 7/6/2022 2:57:11 PM

by: x

Page 1 of 1

**(18)** (3*R*)-3-Acetoxy-1-methyl-1-pyrrolidinium Chloride HPLC. Note: Noise from the injection has a retention time from 1.6 min until 2.5 min. The compound of interest has a retention time of 3.097 min.

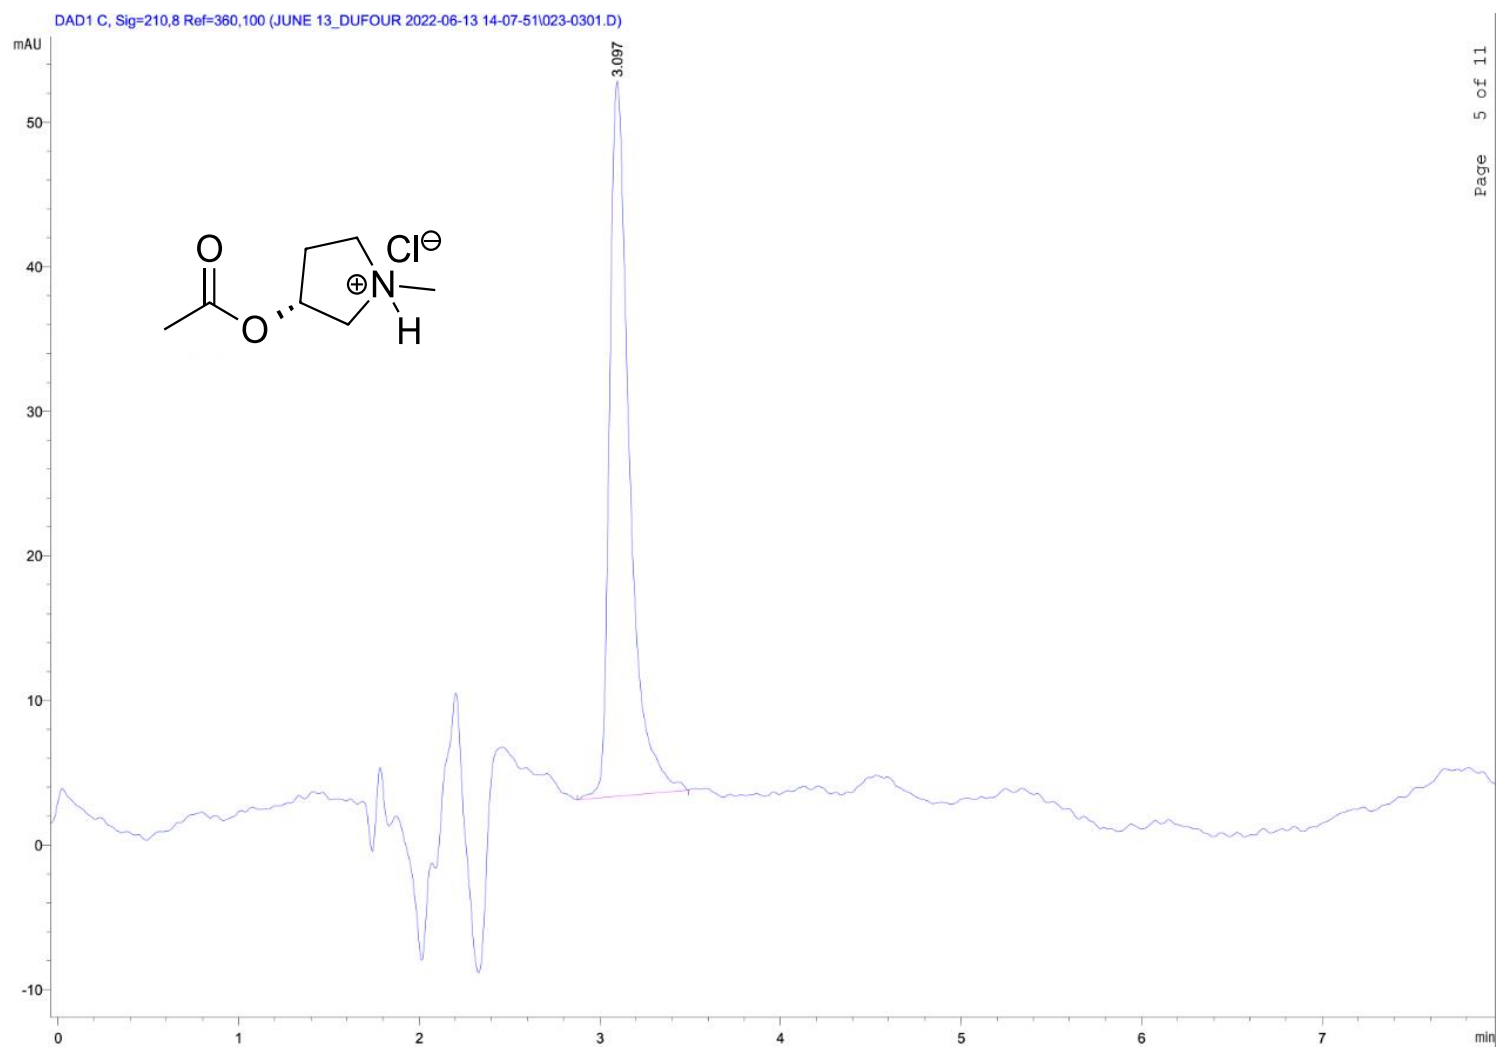

**(19) ((3*S*)-1-Methylpyrrolidin-3-yl) Butanethioate**

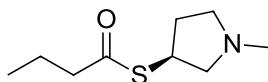

Synthesis: **(3*R*)-3-(Mesyloxy)-1-methylpyrrolidine**: (3*R*)-(-)-1-Methyl-3-pyrrolidinol (6.0 mL, 54.6 mmol) was dissolved in anhydrous dichloromethane (180 mL) and cooled to 0°C with an ice bath. Triethylamine (11.4 mL, 81.9 mmol) and methanesulfonyl chloride (4.9 mL, 62.8 mmol) were added dropwise at 0°C. The ice bath was removed after 5 min, and the reaction was stirred overnight (16 hrs). The reaction was quenched with brine (50 mL), extracted with dichloromethane (3 × 15 mL) and dried over Na<sub>2</sub>SO<sub>3</sub>. The solvent was removed *in vacuo* to produce (3*R*)-3-(mesyloxy)-1-methylpyrrolidine as a yellow oil (6.11 g, 54%). Product confirmed by <sup>1</sup>H NMR and immediately carried through to next step.

Spectroscopic data: <sup>1</sup>H NMR (400 MHz, CDCl<sub>3</sub>) δ 5.23-5.19 (m, 1H), 3.01 (s, 3H), 2.90 (dd, J = 11.6 Hz, 2.0 Hz, 1H), 2.87-2.83 (m, 1H), 2.71 (dd, J = 11.3, 5.7 Hz, 1H), 2.37 (s, 3H), 2.35-2.28 (m, 2H), 2.14-2.05 (m, 1H).

**(3*S*)-S-(1-Methylpyrrolidin-3-yl) ethanethioate**: (3*R*)-3-(Mesyloxy)-1-methylpyrrolidine (6.11g, 34.11 mmol), was dissolved in anhydrous THF (114 mL) under an argon atmosphere. 18-Crown-6-ether (9.91 g, 37.5 mmol) was added followed by potassium thioacetate (4.29 g, 37.5 mmol), added in 3 portions. Once all potassium thioacetate had gone into solution, the reaction was heated to 30°C and stirred overnight. The reaction was gravity filtered and the filtrate was diluted with water (50 mL). The layers were separated, and the aqueous layer was extracted with ethyl acetate (3 × 15 mL). The combined organic layers were washed with water (3 × 20 mL) and brine (3 × 20 mL), dried over Na<sub>2</sub>SO<sub>3</sub>, gravity filtered, and the filtrate was concentrated *in vacuo*

to produce a red oil. This crude material was distilled under vacuum (1 mm Hg at 95 °C) to give (3*S*)-*S*-(1-methylpyrrolidin-3-yl) ethanethioate as a yellow oil (2.33 g, 37%). Product confirmed by <sup>1</sup>H NMR and immediately carried through to next step.

*Spectroscopic data:* <sup>1</sup>H NMR (400 MHz, CDCl<sub>3</sub>) δ 3.95-3.89 (m, 1H), 2.94 (dd, J = 10.2 Hz, 7.3 Hz, 1H), 2.76-2.71 (m, 1H), 2.56 (dd, J = 10.4, 4.8 Hz, 1H), 2.52-2.46 (m, 1H), 2.40-2.35 (m, 1H), 2.38 (s, 3H).

**(3*S*)-1-Methyl-3-pyrrolidinethiol:** (3*S*)-*S*-(1-Methylpyrrolidin-3-yl) ethanethioate (0.952 g, 5.98 mmol) was dissolved in MeOH (30 mL) and sodium methoxide (0.333 g, 5.98 mmol) was added to the stirring solution. After (3*S*)-*S*-(1-methylpyrrolidin-3-yl) ethanethioate was no longer visible by thin layer chromatography developed by a KMnO<sub>4</sub> stain, the reaction was concentrated *in vacuo*. The resulting material was taken up in dichloromethane and concentrated *in vacuo*, and this process was repeated twice.

Product confirmed by <sup>1</sup>H NMR and immediately carried through to next step.

*Spectroscopic data:* <sup>1</sup>H NMR (400 MHz, CDCl<sub>3</sub>) δ 3.40-3.35 (m, 1H), 2.79-2.71 (m, 2H), 2.52-2.48 (m, 1H), 2.33-2.36 (m, 3H), 2.31 (s, 3H), 1.72-1.63 (m, 1H).

**((3*S*)-1-Methylpyrrolidin-3-yl) butanethioate:** The entire material of (3*S*)-1-methyl-3-pyrrolidinethiol from the previous step was dissolved in dichloromethane (20 mL) and the resulting solution was cooled to 0°C in an ice bath. Butyryl chloride (0.621 mL, 5.98 mmol) was added followed by triethylamine (1.67 mL, 12.0 mmol). The ice bath was removed after 30 mins and the reaction was stirred overnight for 16 hrs. The reaction was concentrated *in vacuo* to afford a white material. This crude material was placed in diethyl ether (20 mL), gravity filtered to remove the insoluble material, and the filtrate was concentrated *in vacuo* to give ((3*S*)-1-methylpyrrolidin-3-yl) butanethioate as a clear oil (0.786 g, 70%).

*Spectroscopic data:* IR(ATR) 2963, 2938, 2774, 1684, 1116, 988, 883  $\text{cm}^{-1}$ ;  $^1\text{H}$  NMR (400 MHz,  $\text{CDCl}_3$ )  $\delta$  3.96-3.90 (m, 1H), 2.94 (dd,  $J = 10.2, 7.3$  Hz, 1H), 2.74-2.68 (m, 1H), 2.54 (dd,  $J = 10.12, 5.2$  Hz, 1H), 2.47 (t,  $J = 7.5$  Hz, 2H), 2.38-2.36 (m, 2H), 2.36 (s, 3H), 1.80-1.72 (m, 1H), 1.65 (sextet,  $J = 7.4$  Hz, 2H), 0.94 (t,  $J = 7.4$  Hz, 3H);  $^{13}\text{C}$  NMR (100.7 MHz,  $\text{DMSO-}d_6$ )  $\delta$  200.1 (0), 62.8 (2), 55.5 (2), 45.8 (2), 42.0 (2), 40.0 (1), 32.2 (2), 19.2 (2), 13.6 (3); HRMS (ESI<sup>+</sup>): calculated for  $\text{C}_9\text{H}_{18}\text{NOS}^+$ : 188.1104 amu; found for  $\text{C}_9\text{H}_{18}\text{NOS}^+$ : 188.1100 amu; HPLC purity at 230 nm (75%  $\text{CH}_3\text{CN}$  : 10%  $\text{CH}_3\text{OH}$  : 15% aqueous triethylamine [0.1% triethylamine in  $\text{H}_2\text{O}$ ], retention time 4.506 mins): 89%.



(19) ((3*S*)-1-Methylpyrrolidin-3-yl) Butanethioate IR(ATR)

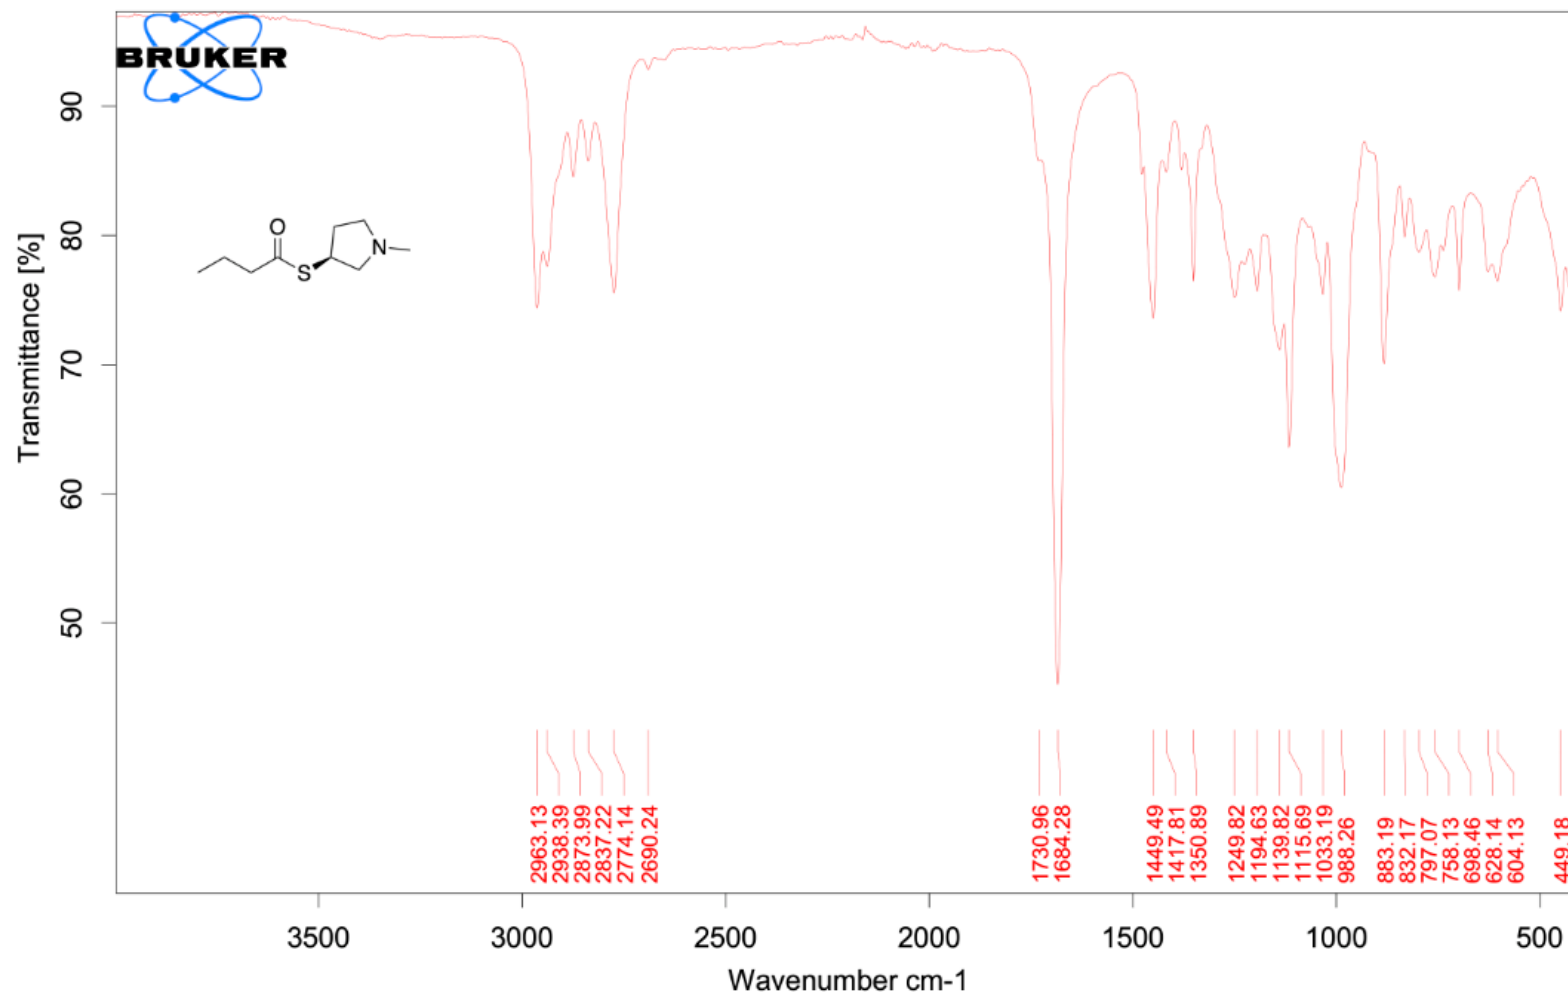

(19) ((3*S*)-1-Methylpyrrolidin-3-yl) Butanethioate <sup>1</sup>H NMR 400 MHz (CDCl<sub>3</sub>)

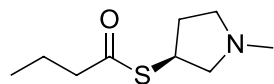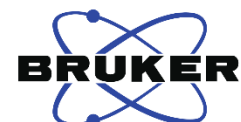

Current Data Parameters  
NAME MD-2-95  
EXPNO 1  
PROCNO 1

F2 - Acquisition Parameters  
Date\_ 20220929  
Time 9.59 h  
INSTRUM AVN 400  
PROBHD Z163739\_0038 (   
PULPROG zg30  
TD 65536  
SOLVENT CDCl3  
NS 16  
DS 2  
SWH 8196.722 Hz  
FIDRES 0.250144 Hz  
AQ 3.9976959 sec  
RG 101  
DW 61.000 usec  
DE 13.55 usec  
TE 298.0 K  
D1 1.00000000 sec  
TD0 1  
SFO1 400.3024719 MHz  
NUC1 1H  
P0 3.33 usec  
P1 9.98 usec  
PLW1 14.13000011 W

F2 - Processing parameters  
SI 65536  
SF 400.3000101 MHz  
WDW EM  
SSB 0  
LB 0.30 Hz  
GB 0  
PC 1.00

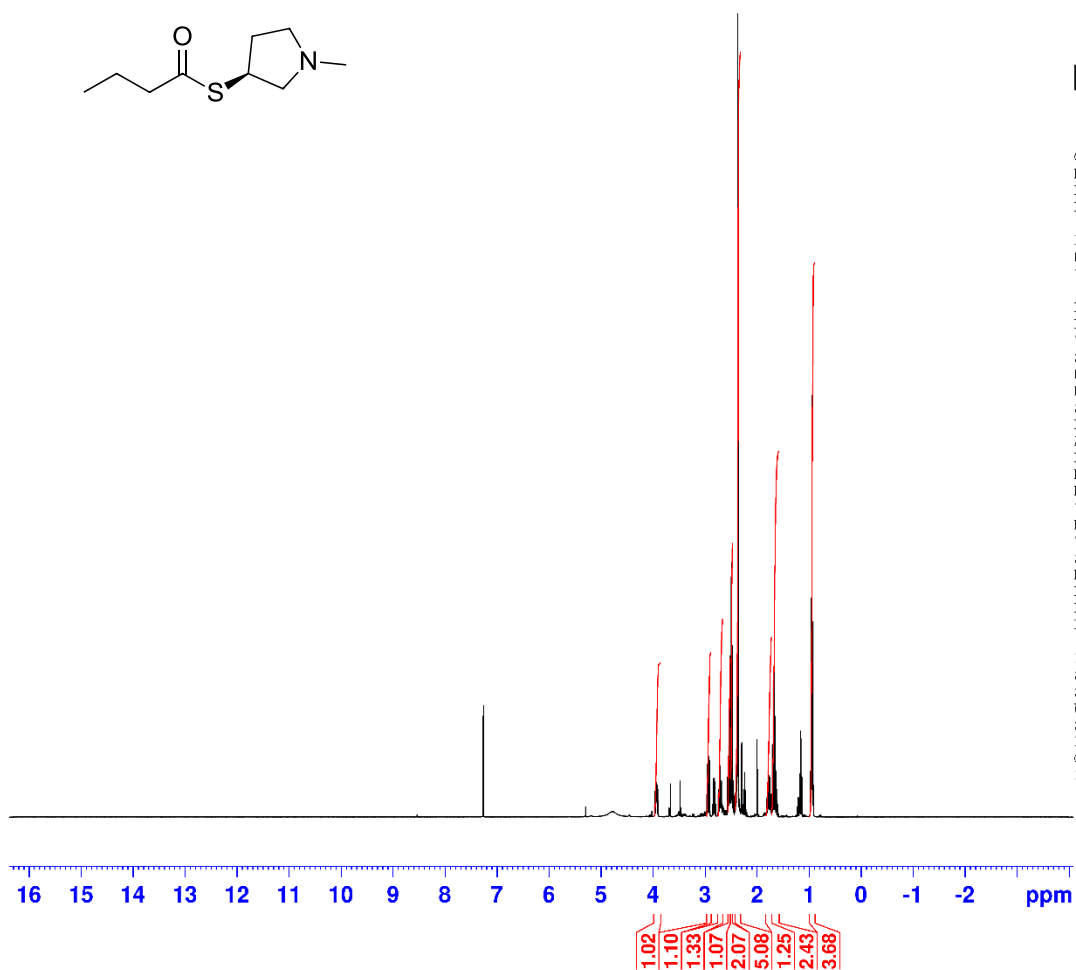

(19) ((3S)-1-Methylpyrrolidin-3-yl) Butanethioate <sup>13</sup>C NMR 100 MHz (CDCl<sub>3</sub>)

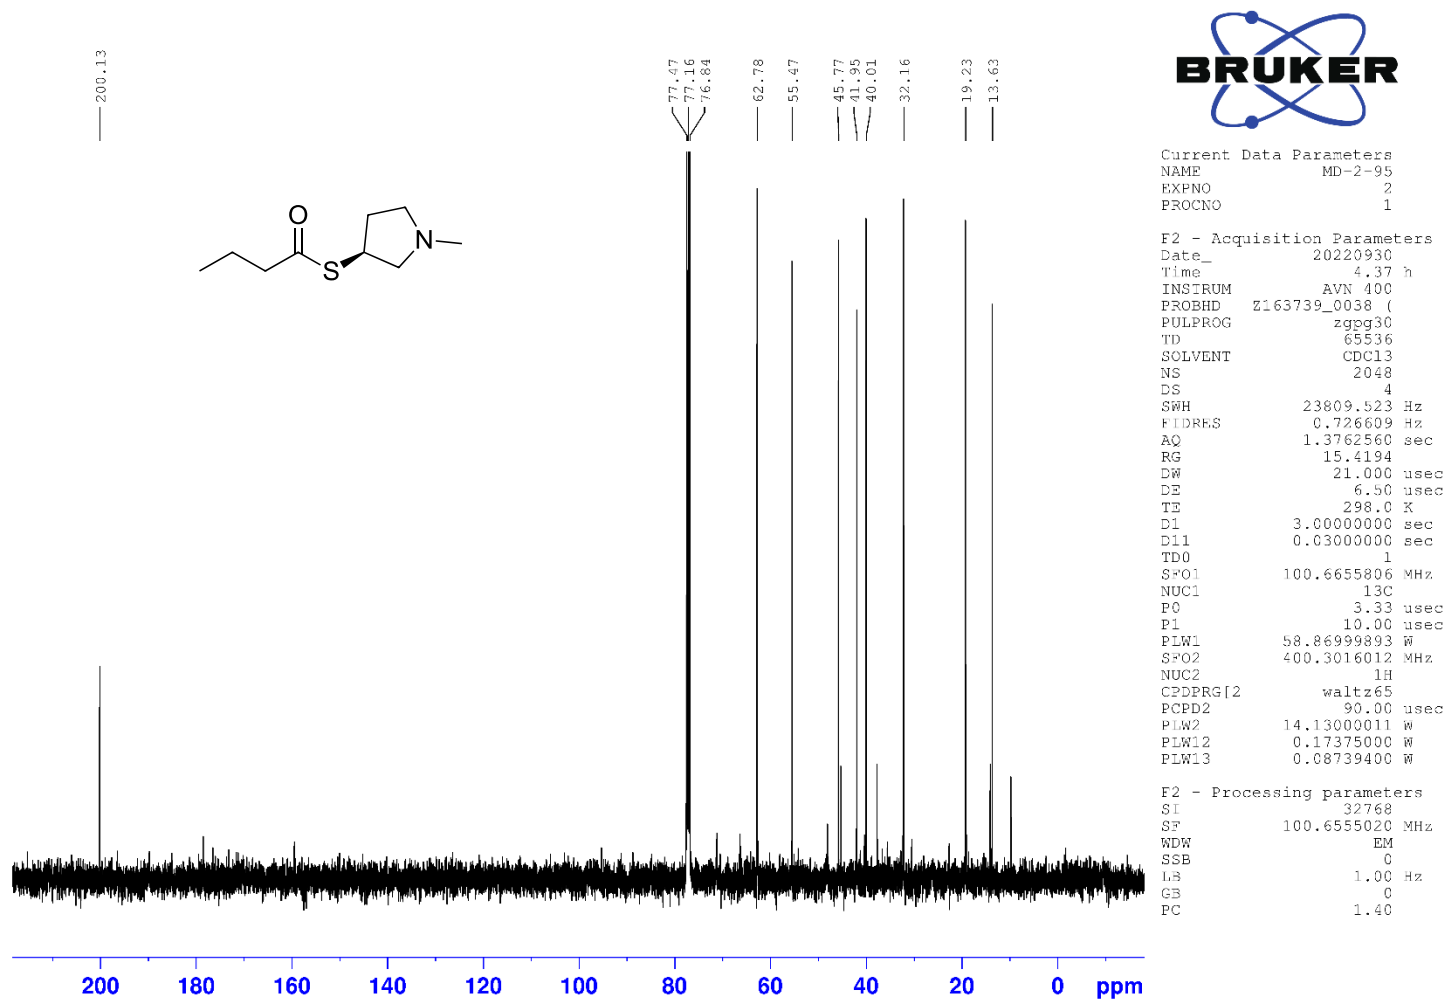

(19) ((3S)-1-Methylpyrrolidin-3-yl) Butanethioate High Resolution Mass Spectrum (ESI, positive mode)

### Mass Spectrum SmartFormula Report

**Analysis Info**

Analysis Name D:\Data\Xiao\Oct 14 2022\2000006.d  
Method Xiao all 1.m  
Sample Name TRV 6023  
Comment

Acquisition Date 2022-10-14 11:10:14 AM  
Operator x  
Instrument compact 8255754.20059

**Acquisition Parameter**

|             |            |                      |          |                  |           |
|-------------|------------|----------------------|----------|------------------|-----------|
| Source Type | ESI        | Ion Polarity         | Positive | Set Nebulizer    | 0.5 Bar   |
| Focus       | Not active | Set Capillary        | 3500 V   | Set Dry Heater   | 181 °C    |
| Scan Begin  | 50 m/z     | Set End Plate Offset | -500 V   | Set Dry Gas      | 4.0 l/min |
| Scan End    | 1500 m/z   | Set Charging Voltage | 2000 V   | Set Divert Valve | Source    |
|             |            | Set Corona           | 0 nA     | Set APCI Heater  | 0 °C      |

| Meas. m/z | Ion Formula | m/z      | err [ppm] |
|-----------|-------------|----------|-----------|
| 188.1100  | C9H18NOS    | 188.1104 | 1.8       |

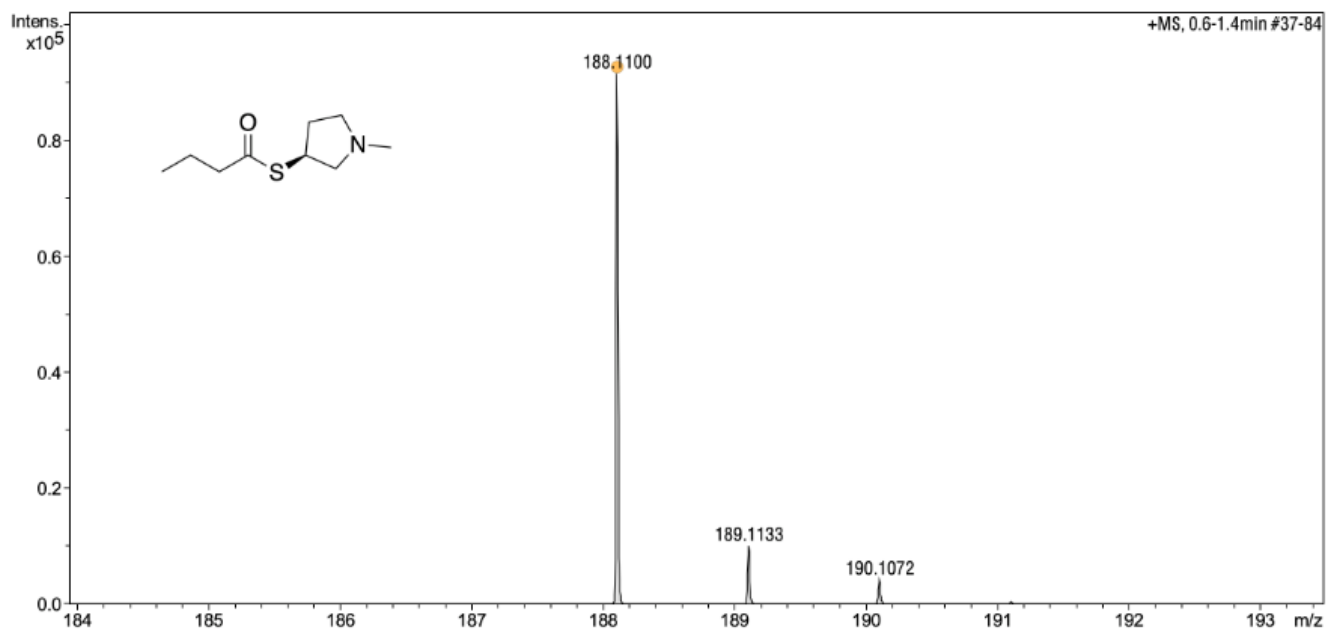

(19) ((3*S*)-1-Methylpyrrolidin-3-yl) Butanethioate HPLC

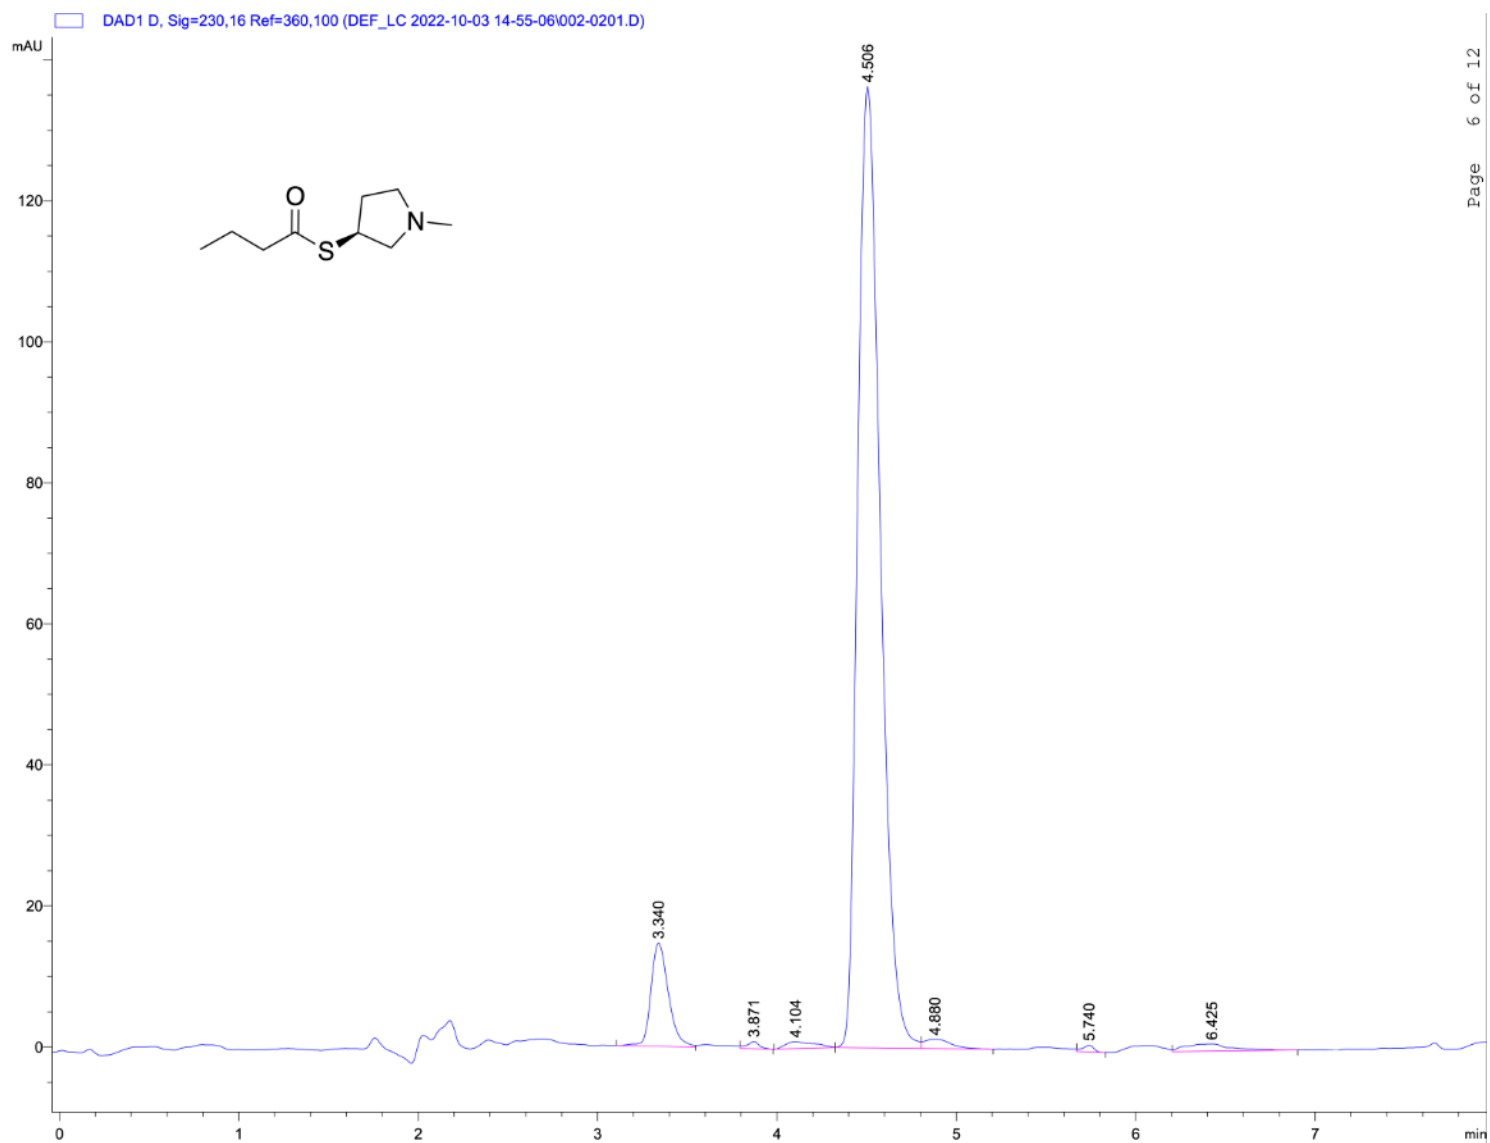

**(20) (3S)-3-Butyroxyl-1-methyl-1-pyrrolidinium Chloride**

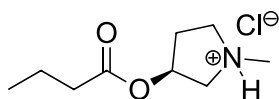

**Synthesis: (3S)-1-Methyl-3-pyrrolidinyl butyrate:** (3S)-(+)-1-Methyl-3-pyrrolidinol (0.329 mL, 3 mmol) and triethylamine (1.05 mL, 7.5 mmol) were dissolved in anhydrous dichloromethane (10 mL) and cooled to 0°C with an ice bath. Butyryl chloride (0.312 mL, 3.00 mmol) was added dropwise at 0°C. The ice bath was removed after 5 min, and the reaction was stirred for 3hrs. The reaction was quenched with brine (10 mL), extracted with dichloromethane (3 × 15 mL) and dried over Na<sub>2</sub>SO<sub>3</sub>. The solvent was removed *in vacuo* to produce a yellow oil. The crude mixture was purified using flash chromatography through silica gel column (5% MeOH/DCM) to afford (3S)-1-methyl-3-pyrrolidinyl butyrate as a yellow viscous liquid (0.367 g, 71%). The analytical data was similar to previously published data.<sup>[4]</sup>

**(3S)-3-Butyroxyl-1-methyl-1-pyrrolidinium chloride:** To a flask charged with (3S)-1-methyl-3-pyrrolidinyl butyrate (0.367 g, 1.77 mmol) anhydrous diethyl ether was added until complete dissolution (35 mL) under an argon atmosphere. HCl in diethyl ether 1 N (2.65 mL, 2.65 mmol) was added dropwise and stirred for 1hr. The solvent was removed *in vacuo* resulting in a white solid. The compound was triturated three times with diethyl ether (20 mL), solvent was removed with a pipet. This process was repeated two more times. The resulting white solid was dried *in vacuo* to produce (3S)-3-butyl-1-methyl-1-pyrrolidinium chloride (0.303 g, 82%).

**Spectroscopic data:** IR(ATR) 3400, 2964, 2877, 2663, 2606, 2576, 2473, 1731, 1167, 1078 cm<sup>-1</sup>; <sup>1</sup>H NMR (400 MHz, DMSO-*d*<sub>6</sub>) δ 11.45 (br s, 1H), 5.27-5.23 (m, 1H), 3.85-3.03 (br app m, 4H), 2.79 (s, 3H), 2.38-2.34 (m, 1H), 2.30 (t, J = 7.4 Hz, 2H), 2.03-2.00 (m, 1H), 1.55 (sext, J = 7.4

Hz, 2H), 0.88 (t, J = 7.4 Hz, 3H);  $^{13}\text{C}$  NMR (100.7 MHz, DMSO-*d*6)  $\delta$  172.4 (0), 72.1 (1), 59.0 (2), 53.1 (2), 40.6 (3), 35.2 (2), 30.3 (2), 17.7 (2), 13.4 (3); LRMS (ESI<sup>+</sup>): 158.1 (M<sup>+</sup>); HRMS (ESI<sup>+</sup>): calculated for C<sub>9</sub>H<sub>18</sub>NO<sub>2</sub><sup>+</sup>: 172.1332 amu; found for C<sub>9</sub>H<sub>18</sub>NO<sub>2</sub><sup>+</sup>: 172.1336 amu; HPLC purity at 210 nm (75% CH<sub>3</sub>CN : 10% CH<sub>3</sub>OH : 15% aqueous triethylamine [0.1% triethylamine in H<sub>2</sub>O], retention time 3.786 mins): >99%.

(20) (3S)-3-Butyryloxy-1-methyl-1-pyrrolidinium Chloride IR(ATR)

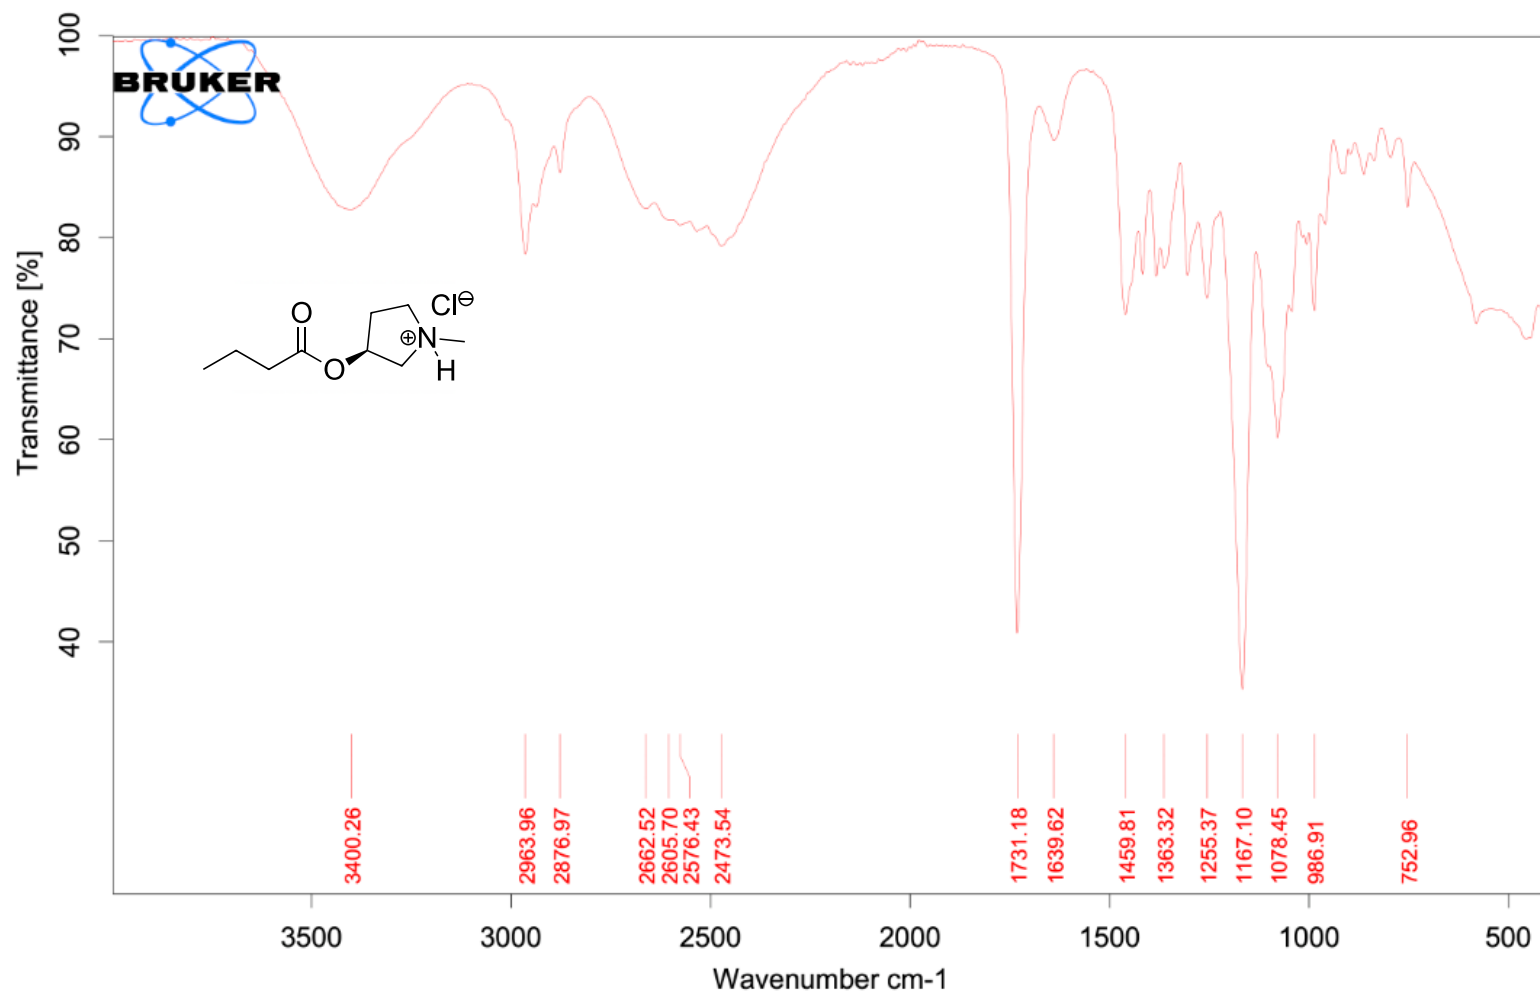



(20) (3S)-3-Butyryloxy-1-methyl-1-pyrrolidinium Chloride <sup>1</sup>H NMR 400 MHz (DMSO-*d*<sub>6</sub>)

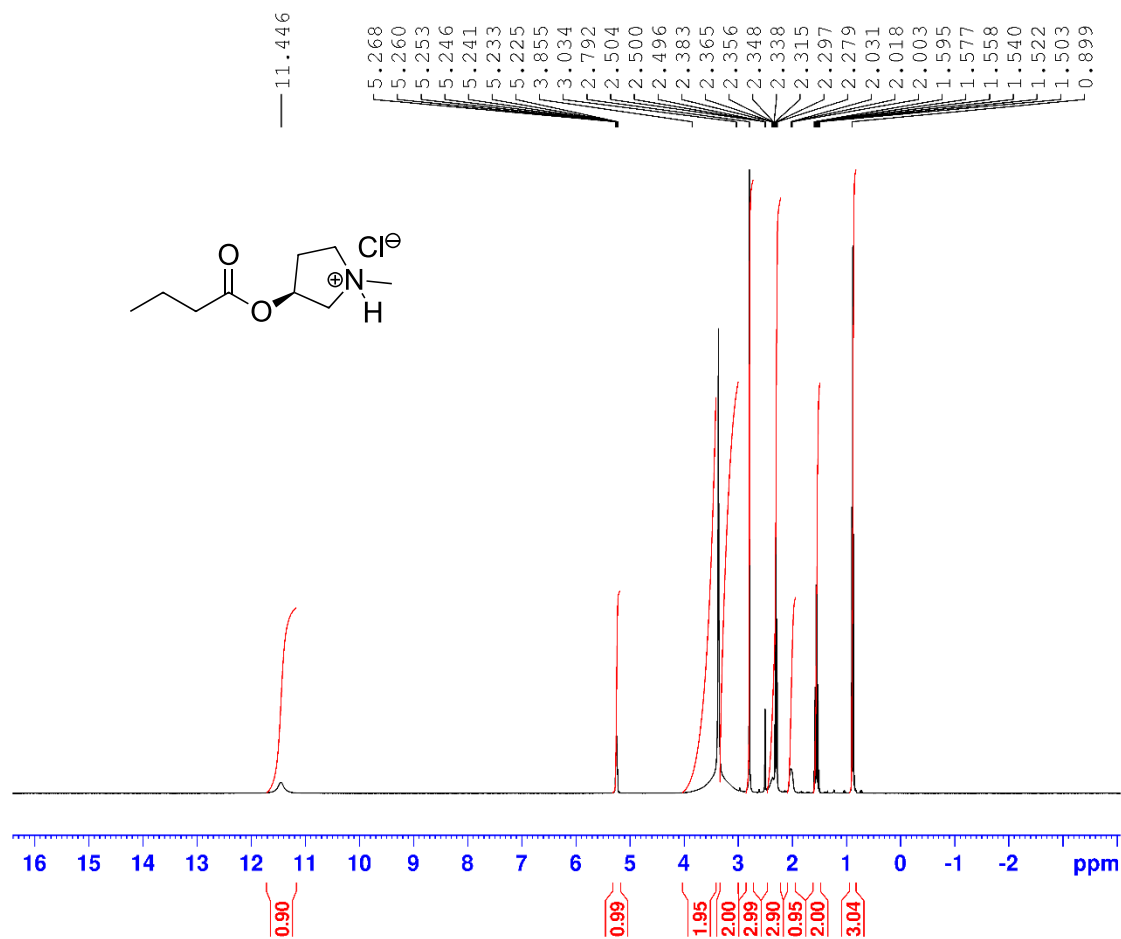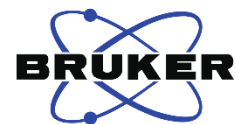

```

Current Data Parameters
NAME          SB-1-128
EXPNO         1
PROCNO        1

F2 - Acquisition Parameters
Date_         20220809
Time          14.13 h
INSTRUM       AVN 400
PROBHD        Z163739_0038 (
PULPROG       zg30
TD            65536
SOLVENT       DMSO
NS            16
DS            2
SWH           8196.722 Hz
FIDRES        0.250144 Hz
AQ            3.9976959 sec
RG            101
DW            61.000 usec
DE            13.54 usec
TE            298.0 K
D1            1.00000000 sec
TD0           1
SFO1          400.3024719 MHz
NUC1          1H
PC            3.33 usec
P1            10.00 usec
PLW1          14.12800026 W

F2 - Processing parameters
SI            65536
SF            400.3000029 MHz
WDW           EM
SSB           0
LB            0.30 Hz
GB            0
PC            1.00
    
```

(20) (3S)-3-Butyryloxy-1-methyl-1-pyrrolidinium Chloride <sup>13</sup>C NMR 100 MHz (DMSO-d<sub>6</sub>)

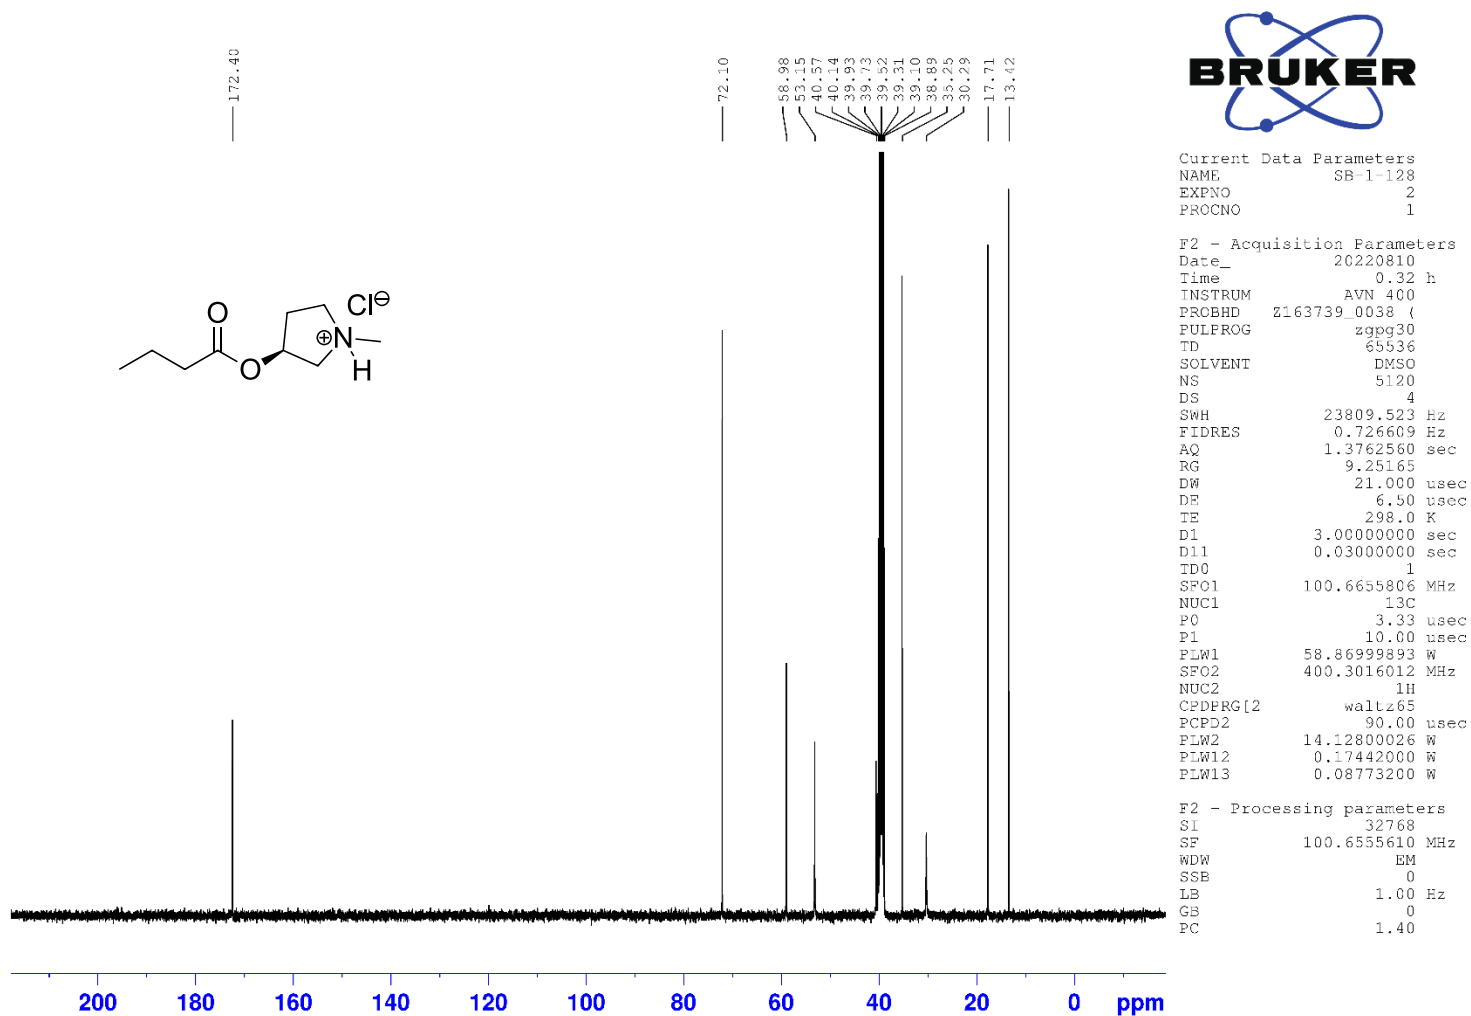

(20) (3S)-3-Butyroxyl-1-methyl-1-pyrrolidinium Chloride High Resolution Mass Spectrum (ESI, positive mode)

### Mass Spectrum SmartFormula Report

**Analysis Info**

Analysis Name D:\Data\Xiao\July 07 2022\000010.d  
Method Xiao all 1.m  
Sample Name TRV 6015 HCl  
Comment

Acquisition Date 7/7/2022 9:46:34 AM  
Operator x  
Instrument compact 8255754.20059

**Acquisition Parameter**

|             |            |                      |          |                  |           |
|-------------|------------|----------------------|----------|------------------|-----------|
| Source Type | ESI        | Ion Polarity         | Positive | Set Nebulizer    | 0.5 Bar   |
| Focus       | Not active | Set Capillary        | 3500 V   | Set Dry Heater   | 180 °C    |
| Scan Begin  | 50 m/z     | Set End Plate Offset | -500 V   | Set Dry Gas      | 4.0 l/min |
| Scan End    | 1500 m/z   | Set Charging Voltage | 2000 V   | Set Divert Valve | Source    |
|             |            | Set Corona           | 0 nA     | Set APCI Heater  | 0 °C      |

| Meas. m/z | Ion Formula | m/z      | err [ppm] |
|-----------|-------------|----------|-----------|
| 172.1336  | C9H18NO2    | 172.1332 | -2.2      |

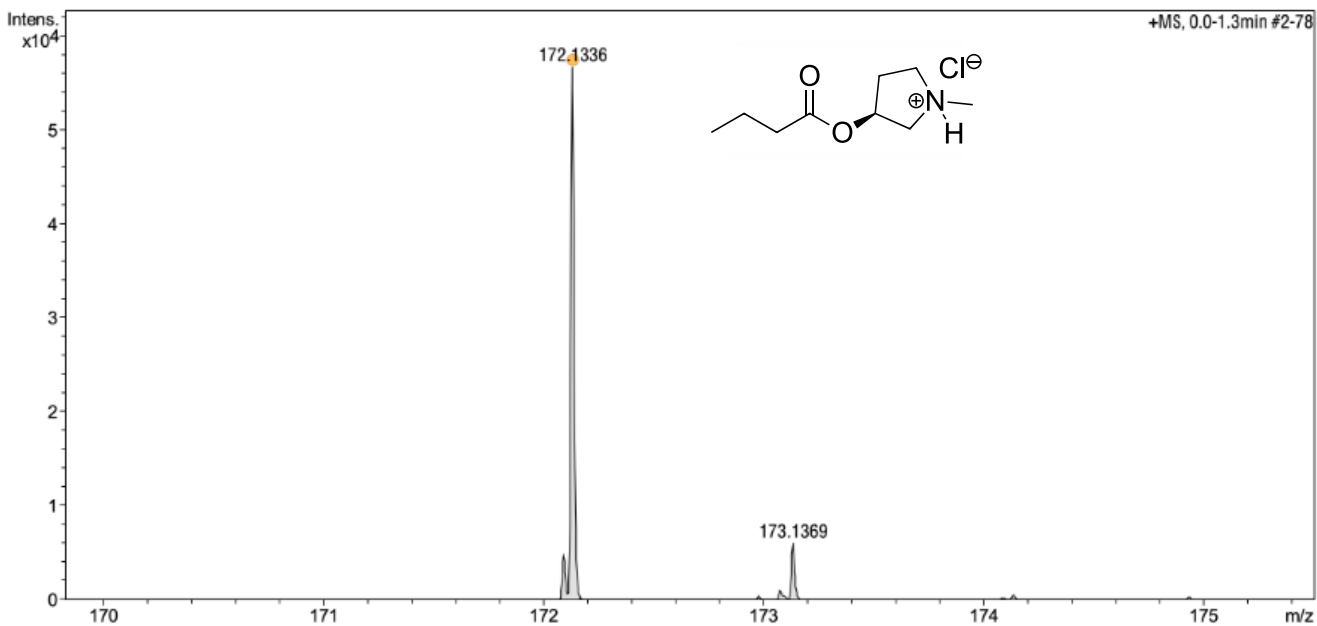

(20) (3*S*)-3-Butyroxyl-1-methyl-1-pyrrolidinium Chloride HPLC. Note: Noise from the injection has a retention time from 1.6 min until 2.5 min. The compound of interest has a retention time of 3.786 mins.

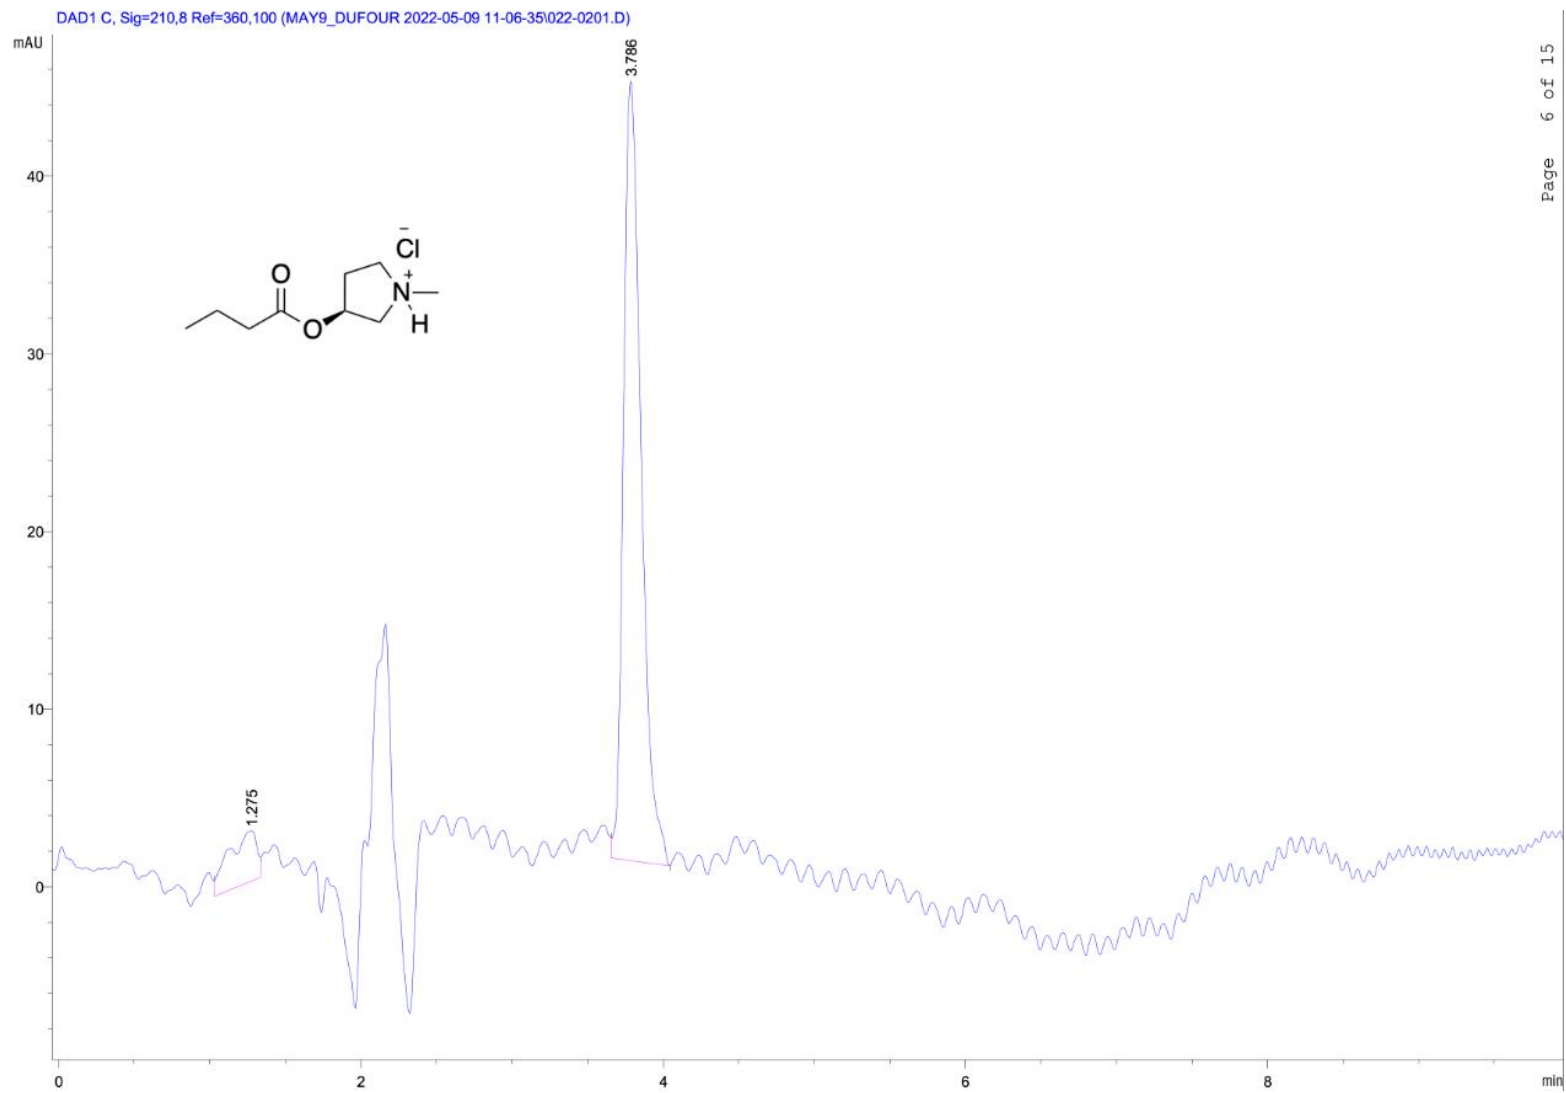

**(21) ((3R)-1-Methylpyrrolidin-3-yl) Butanethioate**

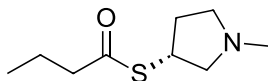

**Synthesis: ((3R)-1-Methylpyrrolidin-3-yl) butanethioate:** (3R)-S-(1-Methylpyrrolidin-3-yl) ethanethioate (1.08 g, 6.76 mmol) was dissolved in MeOH (30 mL) and cooled in an ice bath. Sodium methoxide (0.438 g, 8.11 mmol) was added in one portion and the reaction was stirred for 3 hrs. The reaction was concentrated *in vacuo* to ensure all methanol was removed. Anhydrous THF (25 mL) and Et<sub>3</sub>N (2.80 mL, 20.3 mmol) was added to this mixture. The stirring solution was cooled to 0°C using an ice bath. Butyryl chloride (1.05 mL, 10.1 mmol) was added dropwise, and a white precipitate formed immediately. The reaction was warmed to room temperature and stirred for 1.5 hrs. The reaction was diluted with diethyl ether (30 mL) washed with water (2 x 30 mL) and brine (30 mL). The organic layer was dried over Na<sub>2</sub>SO<sub>4</sub>, gravity filtered, and the filtrate was concentrated *in vacuo*. The crude material was subjected to flash chromatography through silica gel (9% methanol in dichloromethane) to afford ((3R)-1-methylpyrrolidin-3-yl) butanethioate (69%, 0.861 g, 4.59 mmol) of as a clear light red liquid.

**Spectroscopic data:** IR(ATR) 2963, 2938, 2773, 1683, 1449, 1116, 985, 884 cm<sup>-1</sup>; <sup>1</sup>H NMR (400 MHz, CDCl<sub>3</sub>) δ 3.96-3.89 (m, 1H), 2.89 (dd, J = 10.1, 7.2 Hz, 1H), 2.72-2.67 (m, 1H), 2.53-2.47 (m, 1H), 2.49 (t, J = 7.4 Hz, 2H), 2.45-2.37 (m, 2H), 2.36 (s, 3H), 1.79-1.72 (m, 1H), 1.68 (sext, J = 7.4 Hz, 2H), 0.94 (t, J = 7.4 Hz, 3H); <sup>13</sup>C NMR (100.7 MHz, CDCl<sub>3</sub>) δ 200.2 (0), 63.1 (2), 55.6 (2), 45.8 (2), 42.1 (3), 40.1 (1), 32.2 (2), 19.2 (2), 13.6 (3); LRMS (ESI<sup>+</sup>): XXX (M<sup>+</sup>); HRMS (ESI<sup>+</sup>): calculated for C<sub>9</sub>H<sub>18</sub>NOS<sup>+</sup>: 188.1104 amu; found for C<sub>9</sub>H<sub>18</sub>NOS<sup>+</sup>: 188.1106 amu; HPLC purity at 230 nm (25% CH<sub>3</sub>CN : 75% CH<sub>3</sub>OH, retention time: 3.323 mins): 98%.

(21) ((3*R*)-1-Methylpyrrolidin-3-yl) Butanethioate IR(ATR)

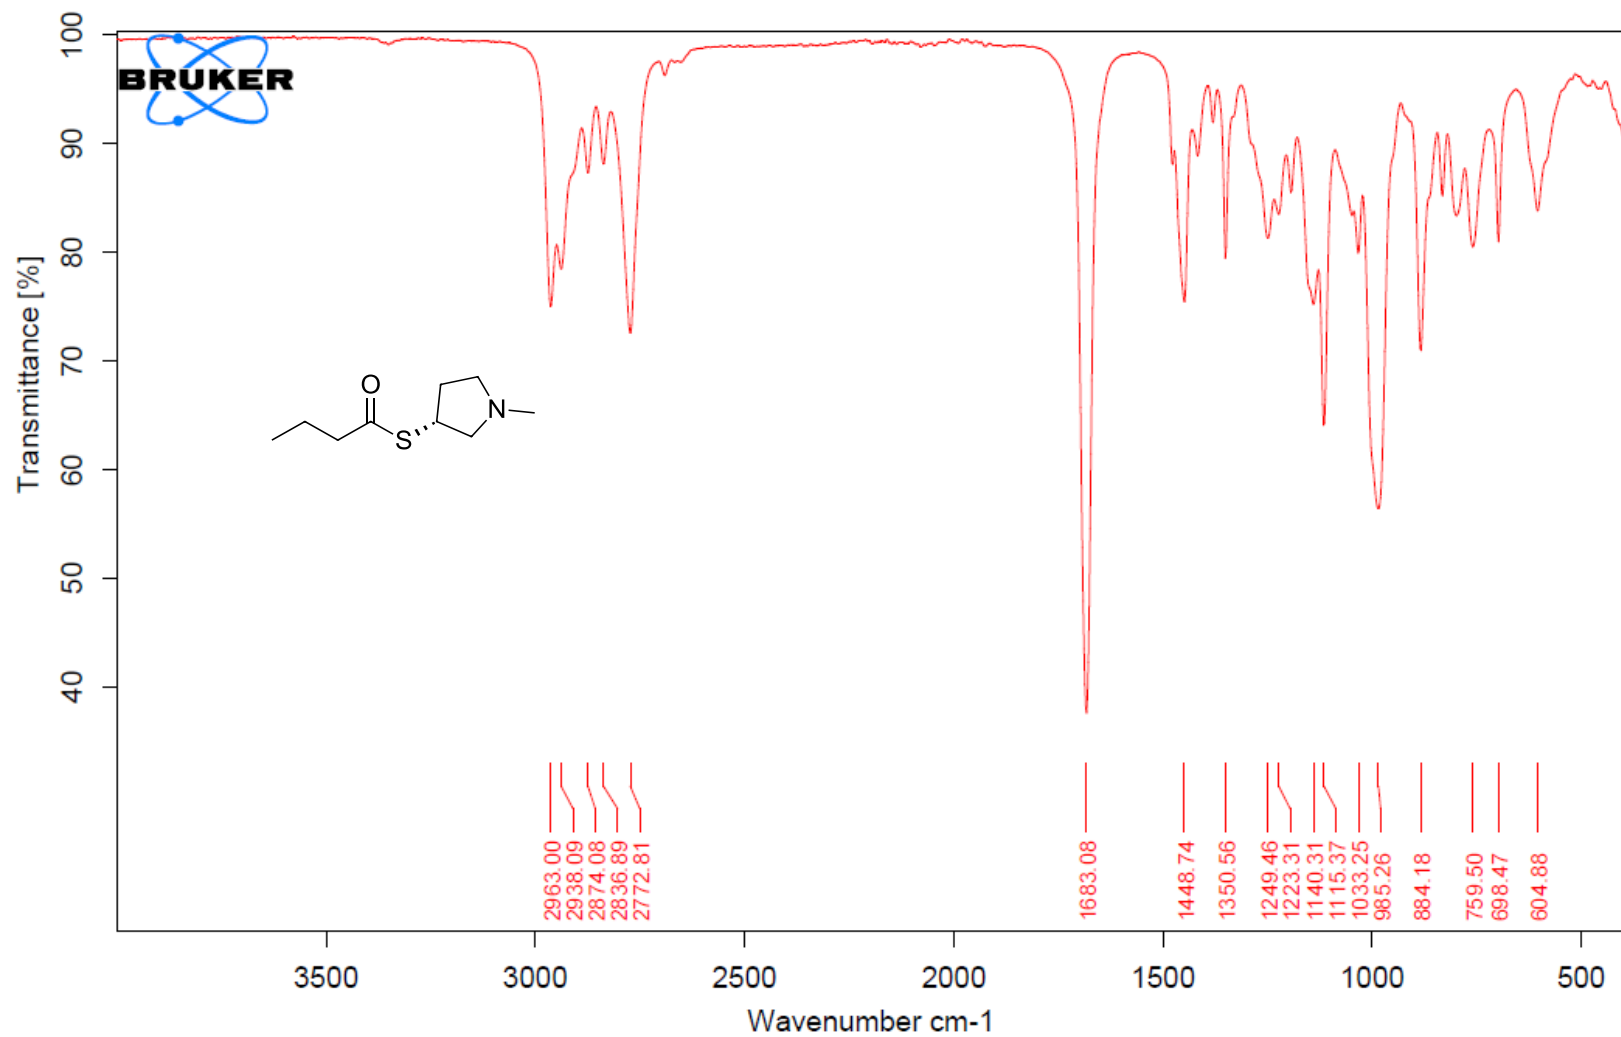

(21) ((3*R*)-1-Methylpyrrolidin-3-yl) Butanethioate <sup>1</sup>H NMR 400 MHz (CDCl<sub>3</sub>)

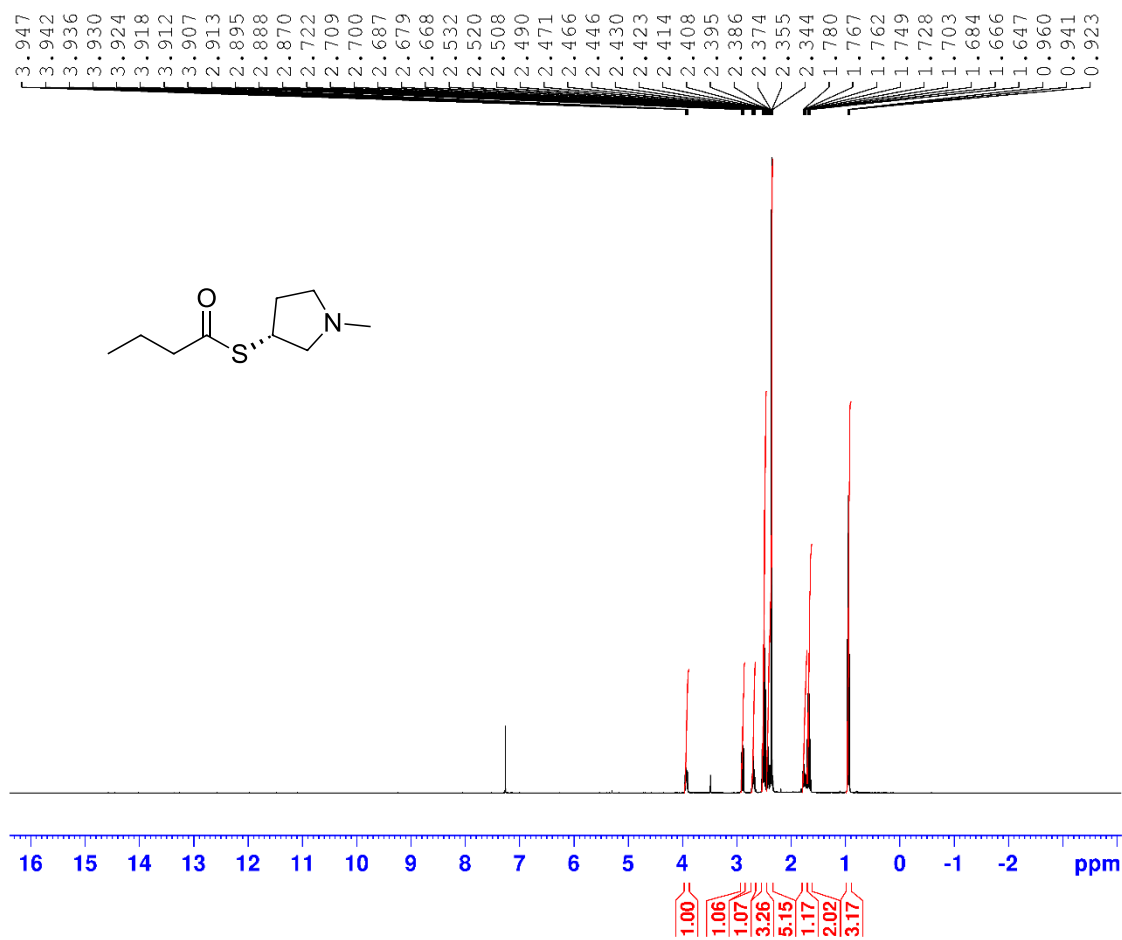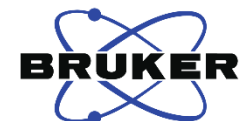

Current Data Parameters  
NAME IRP-2023-007A  
EXPNO 1  
PROCNO 1

F2 - Acquisition Parameters  
Date\_ 20230203  
Time 12.20 h  
INSTRUM AVN 400  
PROBHD Z163739\_0038 (zg30)  
PULPROG zg30  
TD 65536  
SOLVENT CDCl3  
NS 16  
DS 2  
SWH 8196.722 Hz  
FIDRES 0.250144 Hz  
AQ 3.9976959 sec  
RG 101  
DW 61.000 usec  
DE 13.55 usec  
TE 298.0 K  
D1 1.00000000 sec  
TDO 1  
SFO1 400.3024719 MHz  
NUC1 1H  
P0 3.33 usec  
P1 9.98 usec  
PLW1 14.13000011 W

F2 - Processing parameters  
SI 65536  
SF 400.3000102 MHz  
WDW EM  
SSB 0  
LB 0.30 Hz  
GB 0  
PC 1.00

(21) ((3*R*)-1-Methylpyrrolidin-3-yl) Butanethioate <sup>13</sup>C NMR 100MHz (CDCl<sub>3</sub>)

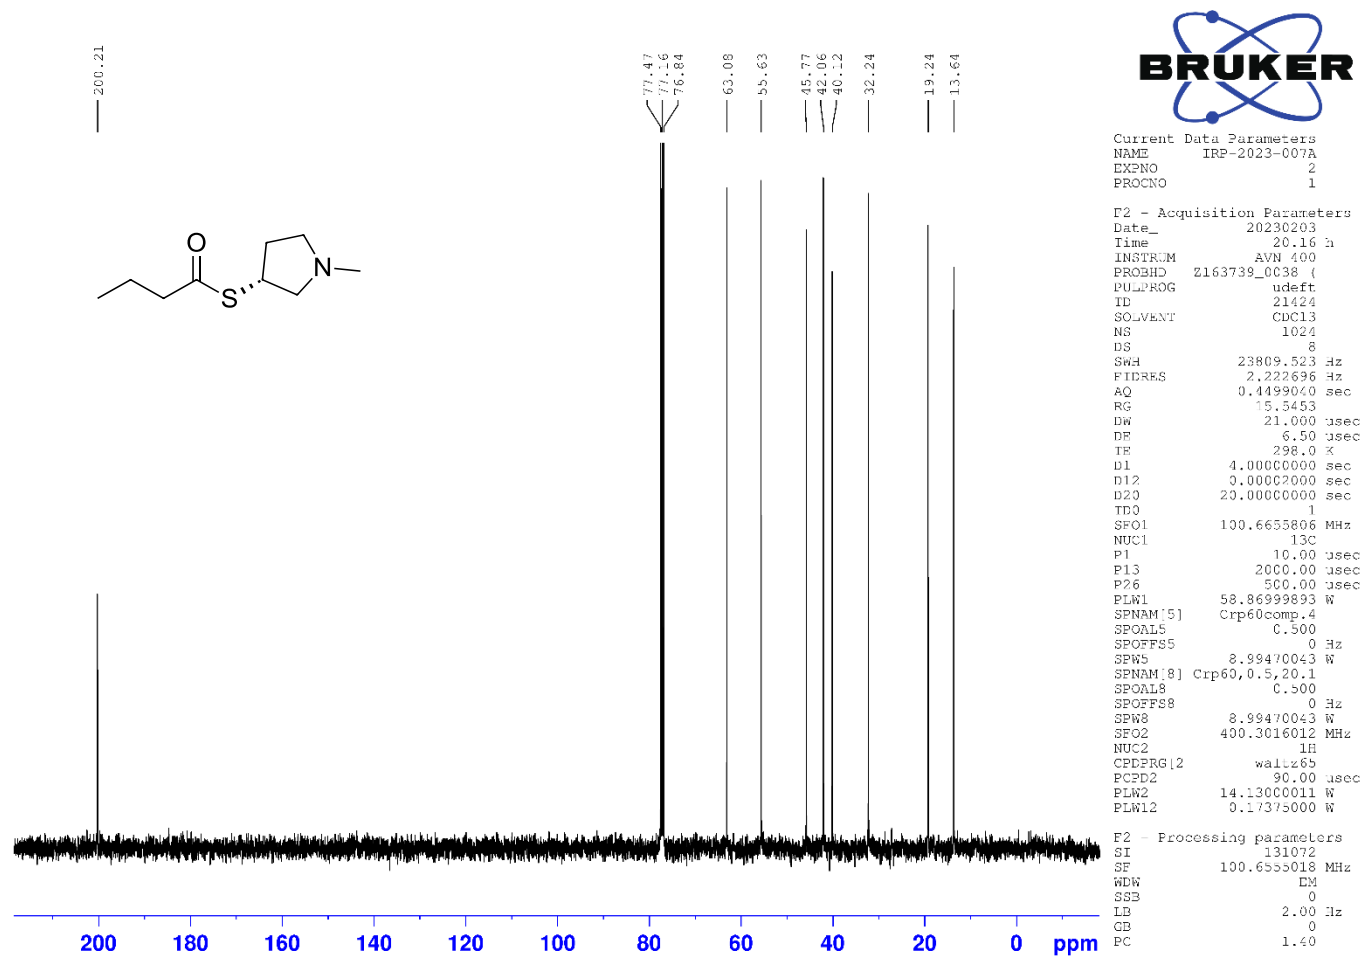



(21) ((3R)-1-Methylpyrrolidin-3-yl) Butanethioate High Resolution Mass Spectrum (ESI, positive mode)

Mass Spectrum SmartFormula Report

Analysis Info

Analysis Name D:\Data\Xiao\Feb 17 2023\000007.d  
Method Xiao all 1.m  
Sample Name TRV6024  
Comment

Acquisition Date 2023-02-17 9:28:19 AM  
Operator x  
Instrument compact 8255754.20059

Acquisition Parameter

|             |            |                      |          |                  |           |
|-------------|------------|----------------------|----------|------------------|-----------|
| Source Type | ESI        | Ion Polarity         | Positive | Set Nebulizer    | 0.5 Bar   |
| Focus       | Not active | Set Capillary        | 3500 V   | Set Dry Heater   | 180 °C    |
| Scan Begin  | 50 m/z     | Set End Plate Offset | -500 V   | Set Dry Gas      | 4.0 l/min |
| Scan End    | 1500 m/z   | Set Charging Voltage | 2000 V   | Set Divert Valve | Source    |
|             |            | Set Corona           | 0 nA     | Set APCI Heater  | 0 °C      |

| Meas. m/z | Ion Formula | m/z      | err [ppm] |
|-----------|-------------|----------|-----------|
| 188.1106  | C9H18NOS    | 188.1104 | -1.3      |

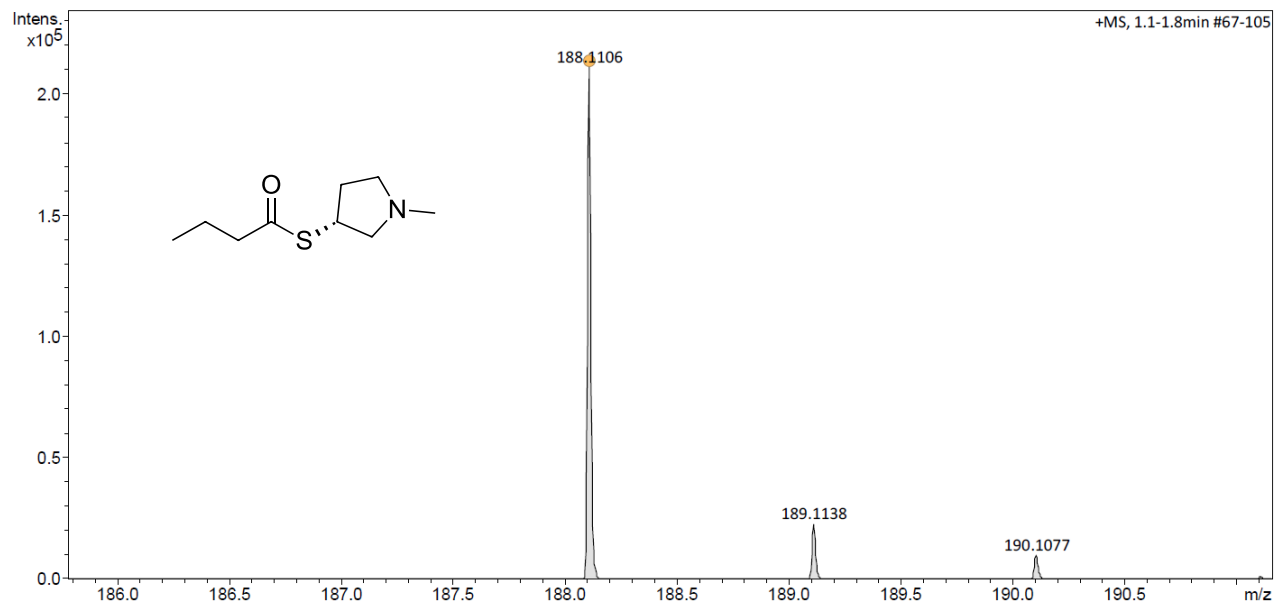

(21) ((3R)-1-Methylpyrrolidin-3-yl) Butanethioate HPLC

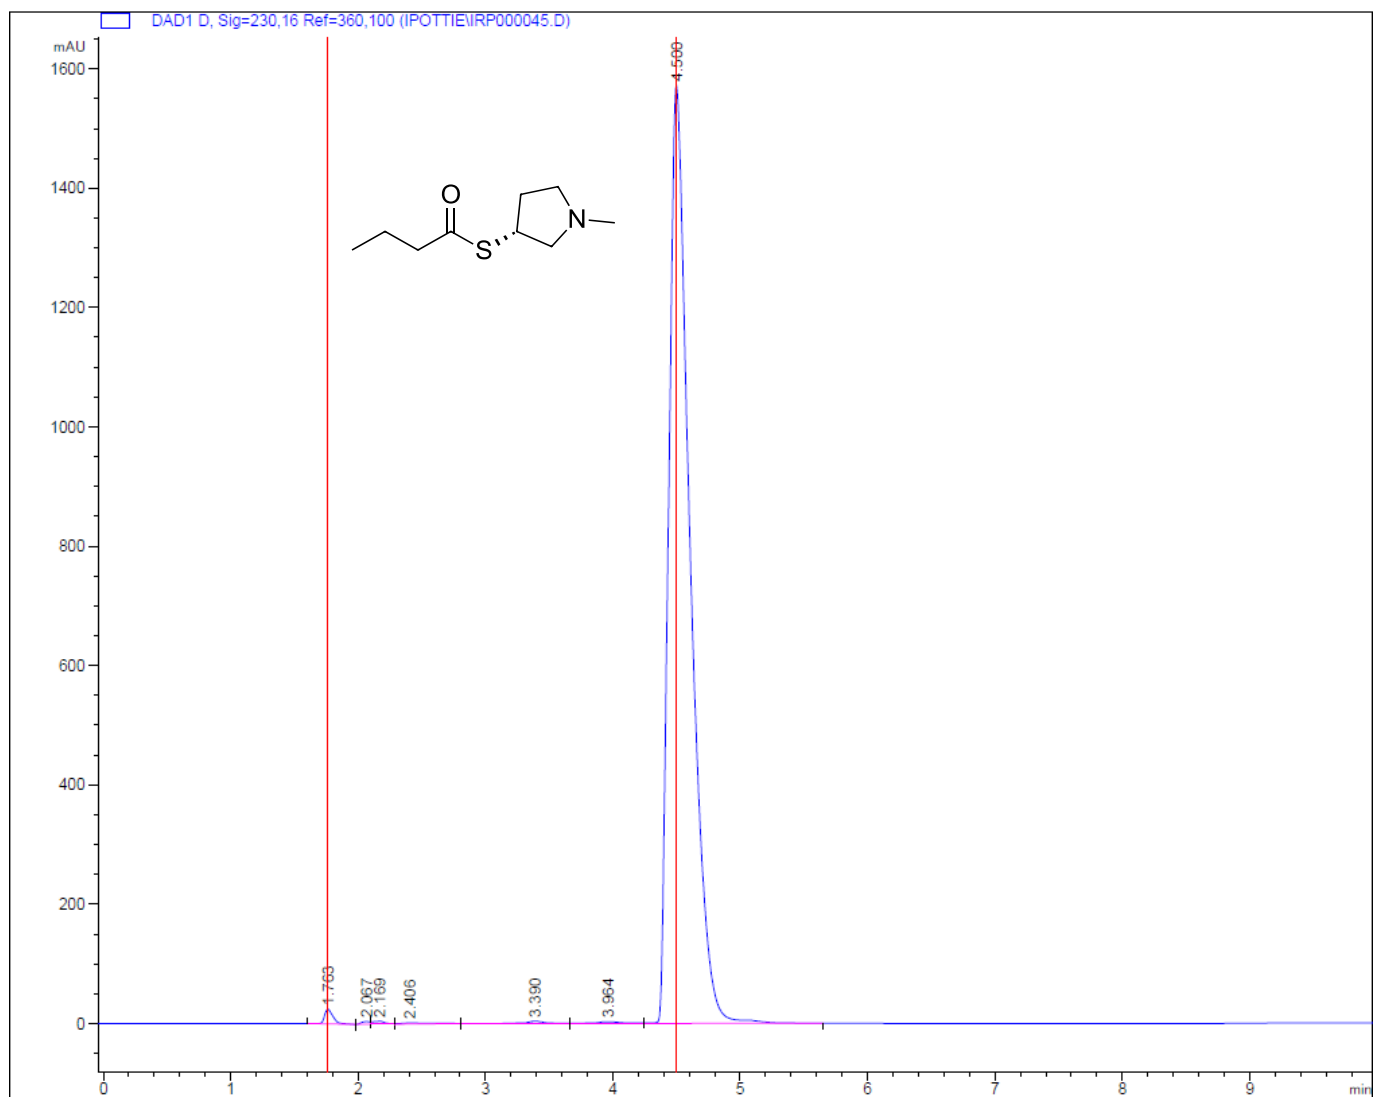

(22) (3R)-3-Butyroxyl-1-methyl-1-pyrrolidinium Chloride

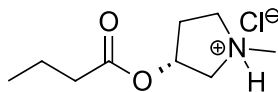

**Synthesis: (3R)-1-methyl-3-pyrrolidinyl butyrate:** (3R)-(-)-1-Methyl-3-pyrrolidinol (0.549 mL, 5.00 mmol) and triethylamine (1.74 mL, 12.5 mmol) were dissolved in anhydrous dichloromethane (17 mL) and cooled to 0°C with an ice bath. Butyryl chloride (0.519 mL, 5.00 mmol) was added dropwise at 0 °C. The ice bath was removed after 5 mins, and the reaction was stirred for 3hrs. The reaction was quenched with brine (20 mL), extracted with dichloromethane (3 × 15 mL) and dried over Na<sub>2</sub>SO<sub>3</sub>. The drying agent was removed was removed *via* gravity filtration and the solvent was removed *in vacuo* to produce a yellow oil. The crude mixture was purified by silica gel column chromatography (5% MeOH/DCM) to produce (3R)-1-methyl-3-pyrrolidinyl butyrate (0.729 g, 85%) as a yellow viscous liquid.

**Spectroscopic data:** IR(ATR) 2964, 2939, 2777, 1730, 1251, 1175 cm<sup>-1</sup>; <sup>1</sup>H NMR (400 MHz, CDCl<sub>3</sub>) δ 5.20-5.15 (m, 1H), 2.84-2.79 (m, 1H), 2.69 (dd, J = 10.9, 2.2 Hz, 1H), 2.61 (dd, J = 10.9, 5.9 Hz, 1H), 2.35 (s, 3H), 2.28-2.25 (m, 4H), 1.88-1.79 (m, 1H), 1.63 (sext, J = 7.4 Hz, 2H), 0.93 (t, J = 7.4 Hz, 3H); <sup>13</sup>C NMR (100.7 MHz, CD<sub>3</sub>OD-*d*4) δ 173.8 (0), 74.5 (1), 62.4 (2), 55.1 (2), 42.32 (3), 36.4 (2), 32.8 (2), 18.6 (2), 13.8 (3); LRMS (ESI<sup>+</sup>): 172.1 (M<sup>+</sup>); HRMS (ESI<sup>+</sup>): calculated for C<sub>9</sub>H<sub>18</sub>NO<sub>2</sub><sup>+</sup>: 172.1332 amu; found for C<sub>9</sub>H<sub>18</sub>NO<sub>2</sub><sup>+</sup>: 172.1334 amu; HPLC purity at 210 nm (75% CH<sub>3</sub>CN : 10% CH<sub>3</sub>OH, 15 % aqueous triethylamine (0.1 % triethylamine in water) retention time: 3.803 mins): 99%.

**(3R)-3-Butyroxyl-1-methyl-1-pyrrolidinium chloride:** To a flask charged with (3R)-1-methyl-3-pyrrolidinyl butyrate (0.364 g, 1.75 mmol) anhydrous diethyl ether was added until complete dissolution (35 mL) under an argon atmosphere. HCl in diethyl ether (1 N - 2.63 mL, 2.63 mmol) was added dropwise and stirred for 1 hr. The solvent was removed *in vacuo* resulting in a white solid. The compound was triturated with diethyl ether (20 mL), solvent was removed with a pipet. The process was repeated two more times. The material was dried *in vacuo* to produce (3R)-3-butyroxyl-1-methyl-1-pyrrolidinium chloride (0.350 g, 96%) as a white solid.

*Spectroscopic data:* IR(ATR) 3407, 2962, 2879, 2663, 2442, 1732, 1164, 1078  $\text{cm}^{-1}$ ;  $^1\text{H}$  NMR (400 MHz,  $\text{D}_2\text{O}$ )  $\delta$  5.47 (app br s, 1H), 3.62 (app br s, 3H), 3.44 (app br s, 1H), 3.00 (s, 3H), 2.59-2.49 (m, 1H), 2.40 (t,  $J = 7.4$  Hz, 2H), 2.28-2.22 (m, 1H), 1.63 (sext,  $J = 7.4$  Hz, 2H), 0.92 (t,  $J = 7.4$  Hz, 3H);  $^{13}\text{C}$  NMR (100.7 MHz,  $\text{D}_2\text{O}$ )  $\delta$  175.8 (0), 72.9 (1), 60.4 (2), 54.3 (2), 41.2 (3), 35.6 (2), 30.4 (2), 17.7 (2), 12.8 (3); LRMS ( $\text{ESI}^+$ ): 172.1 ( $\text{M}^+$ );  $^+$ ; HRMS ( $\text{ESI}^+$ ): calculated for  $\text{C}_9\text{H}_{18}\text{NO}_2^+$ : 172.1332 amu; found for  $\text{C}_9\text{H}_{18}\text{NO}_2^+$ : 172.1331 amu; HPLC purity at 210 nm (75%  $\text{CH}_3\text{CN}$  : 10%  $\text{CH}_3\text{OH}$ , 15 % aqueous triethylamine (0.1 % triethylamine in water) retention time: 3.805 mins): >99%.

(22) (3R)-3-Butyroxyl-1-methyl-1-pyrrolidinium Chloride IR(ATR)

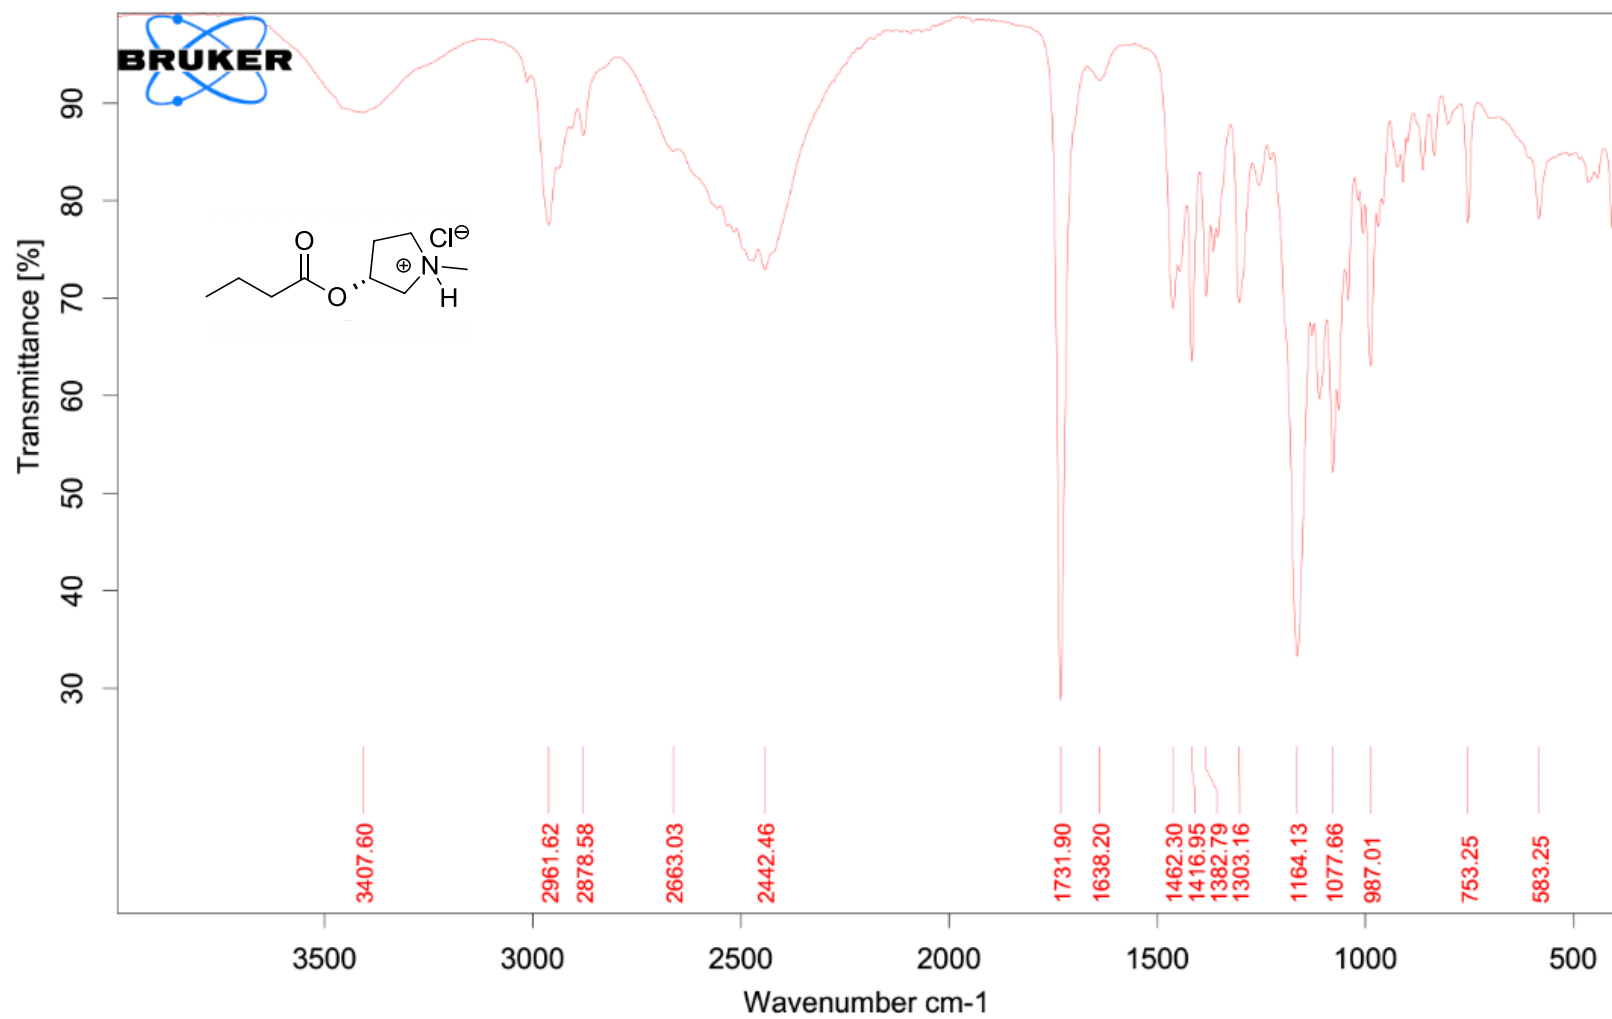

(22) (3*R*)-3-Butyroxyl-1-methyl-1-pyrrolidinium Chloride <sup>1</sup>H NMR 400 MHz (D<sub>2</sub>O)

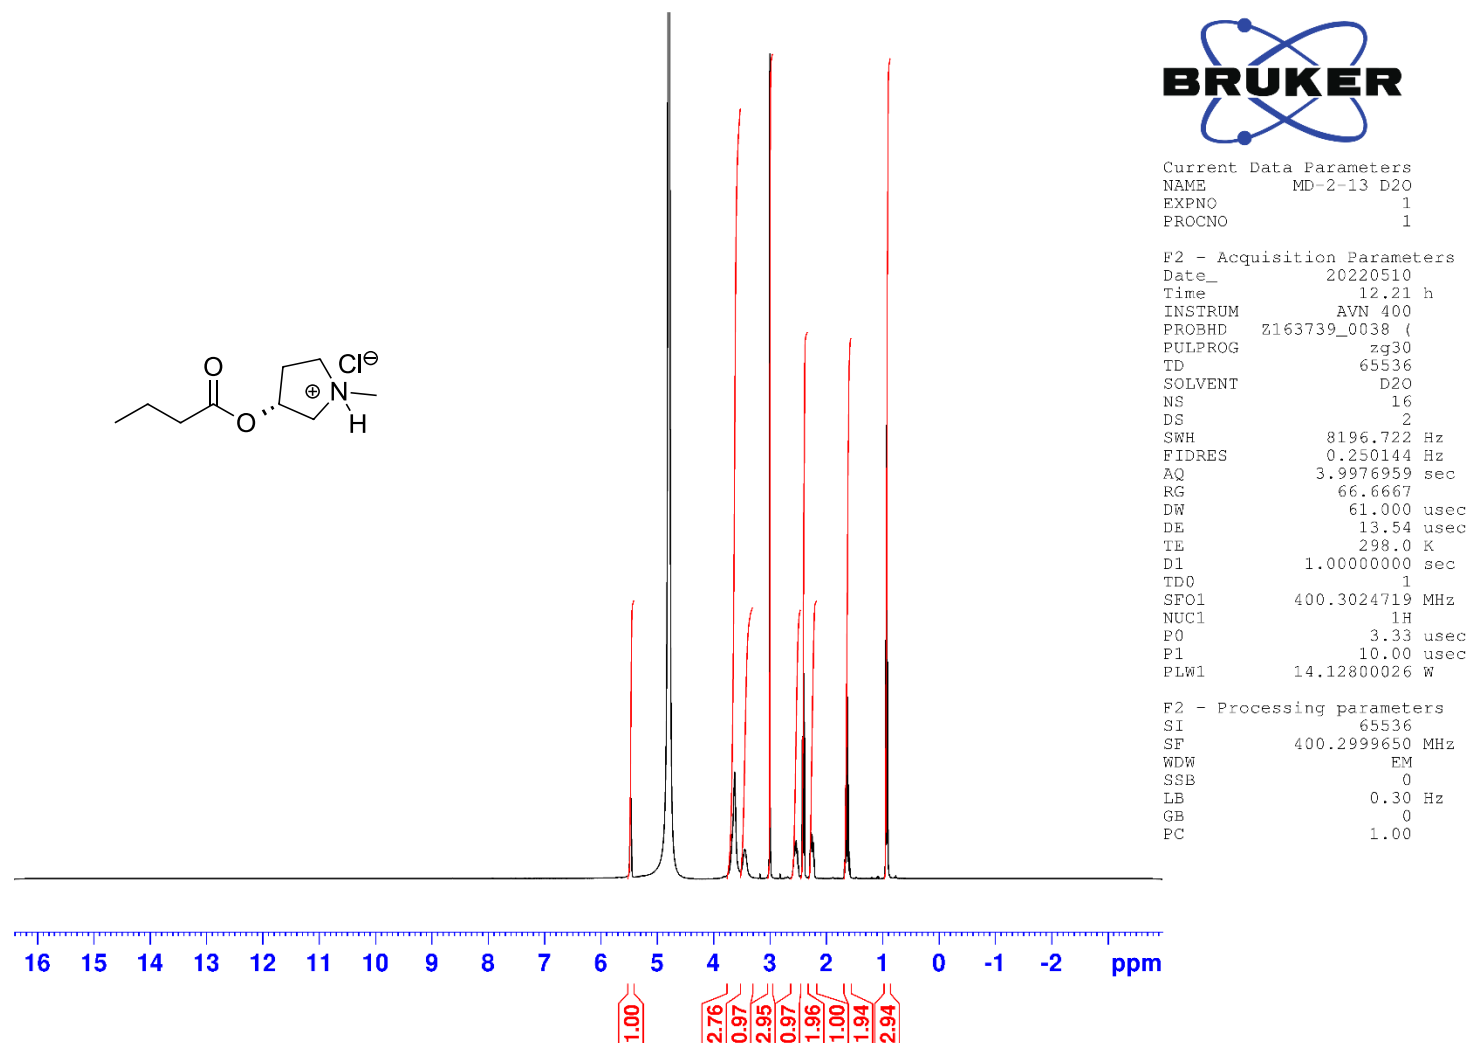

(22) (3R)-3-Butyroxyl-1-methyl-1-pyrrolidinium Chloride <sup>13</sup>C NMR 100 MHz (D<sub>2</sub>O)

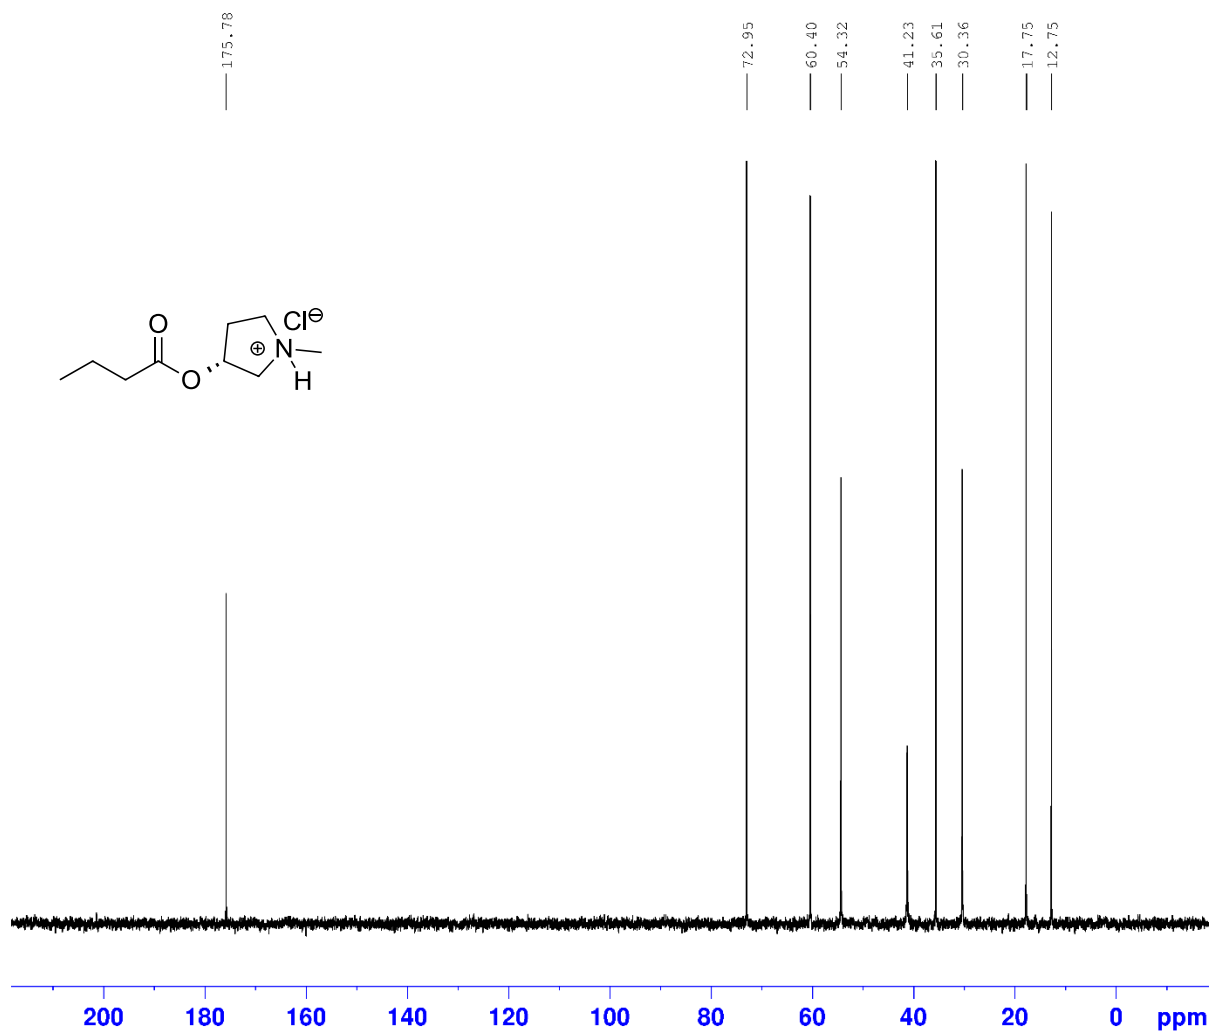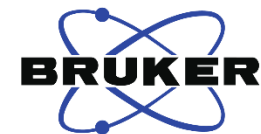

Current Data Parameters  
NAME MD-2-13 D2O  
EXPNO 2  
PROCNO 1

F2 - Acquisition Parameters  
Date\_ 20220512  
Time 0.43 h  
INSTRUM AVN 400  
PROBHD Z163739\_0038 ( )  
PULPROG udef1  
TD 21424  
SOLVENT D2O  
NS 1920  
DS 8  
SWH 23809.523 Hz  
FIDRES 2.222696 Hz  
AQ 0.4499040 sec  
RG 26.3136  
DW 21.000 usec  
DE 6.50 usec  
TE 298.0 K  
D1 4.00000000 sec  
D12 0.00002000 sec  
D20 20.00000000 sec  
TD0 1  
SFO1 100.6655806 MHz  
NUC1 13C  
P1 10.00 usec  
P13 2000.00 usec  
P26 500.00 usec  
PLW1 58.86999893 W  
SPNAM[5] Crp60comp.4  
SPOAL5 0.500  
SPOFTS5 0 Hz  
SPW5 8.99470043 W  
SPNAM[8] Crp60,0.5,20.1  
SPOAL8 0.500  
SPOFTS8 0 Hz  
SPW8 8.99470043 W  
SFO2 400.3016012 MHz  
NUC2 1H  
CPDPRG[2] waltz65  
PCPD2 90.00 usec  
PLW2 14.12800026 W  
PLW12 0.17442000 W

F2 - Processing parameters  
SI 131072  
SF 100.6555151 MHz  
WDW EM  
SSB 0  
LB 2.00 Hz  
GB 0  
PC 1.40

(22) (3R)-3-Butyroxyl-1-methyl-1-pyrrolidinium Chloride High Resolution Mass Spectrum (ESI, positive mode)

### Mass Spectrum SmartFormula Report

**Analysis Info**

Analysis Name D:\Data\Xiao\July 07 2022\000012.d  
Method Xiao all 1.m  
Sample Name TRV 6016 HCl  
Comment

Acquisition Date 7/7/2022 9:55:17 AM  
Operator x  
Instrument compact 8255754.20059

**Acquisition Parameter**

|             |            |                      |          |                  |           |
|-------------|------------|----------------------|----------|------------------|-----------|
| Source Type | ESI        | Ion Polarity         | Positive | Set Nebulizer    | 0.5 Bar   |
| Focus       | Not active | Set Capillary        | 3500 V   | Set Dry Heater   | 180 °C    |
| Scan Begin  | 50 m/z     | Set End Plate Offset | -500 V   | Set Dry Gas      | 4.0 l/min |
| Scan End    | 1500 m/z   | Set Charging Voltage | 2000 V   | Set Divert Valve | Source    |
|             |            | Set Corona           | 0 nA     | Set APCI Heater  | 0 °C      |

| Meas. m/z | Ion Formula | m/z      | err [ppm] |
|-----------|-------------|----------|-----------|
| 172.1331  | C9H18NO2    | 172.1332 | 0.5       |

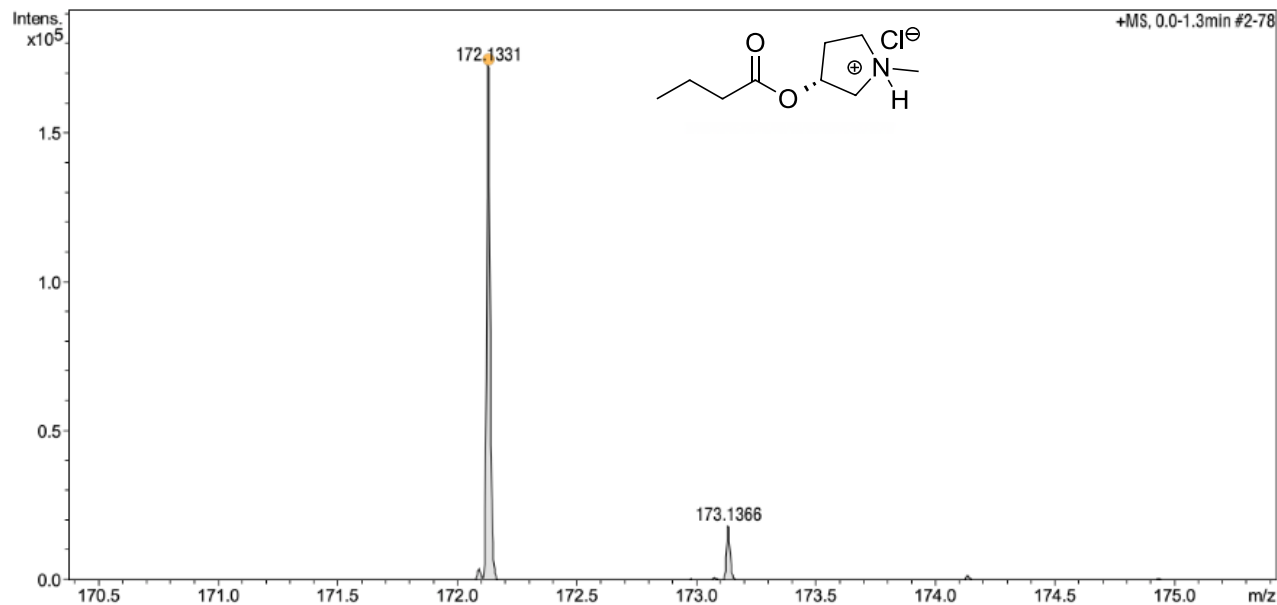



**(22)** (3*R*)-3-Butyroxyl-1-methyl-1-pyrrolidinium Chloride HPLC. Note: Noise from the injection has a retention time from 1.6 min until 2.5 min. The compound of interest has a retention time of 3.805 min.

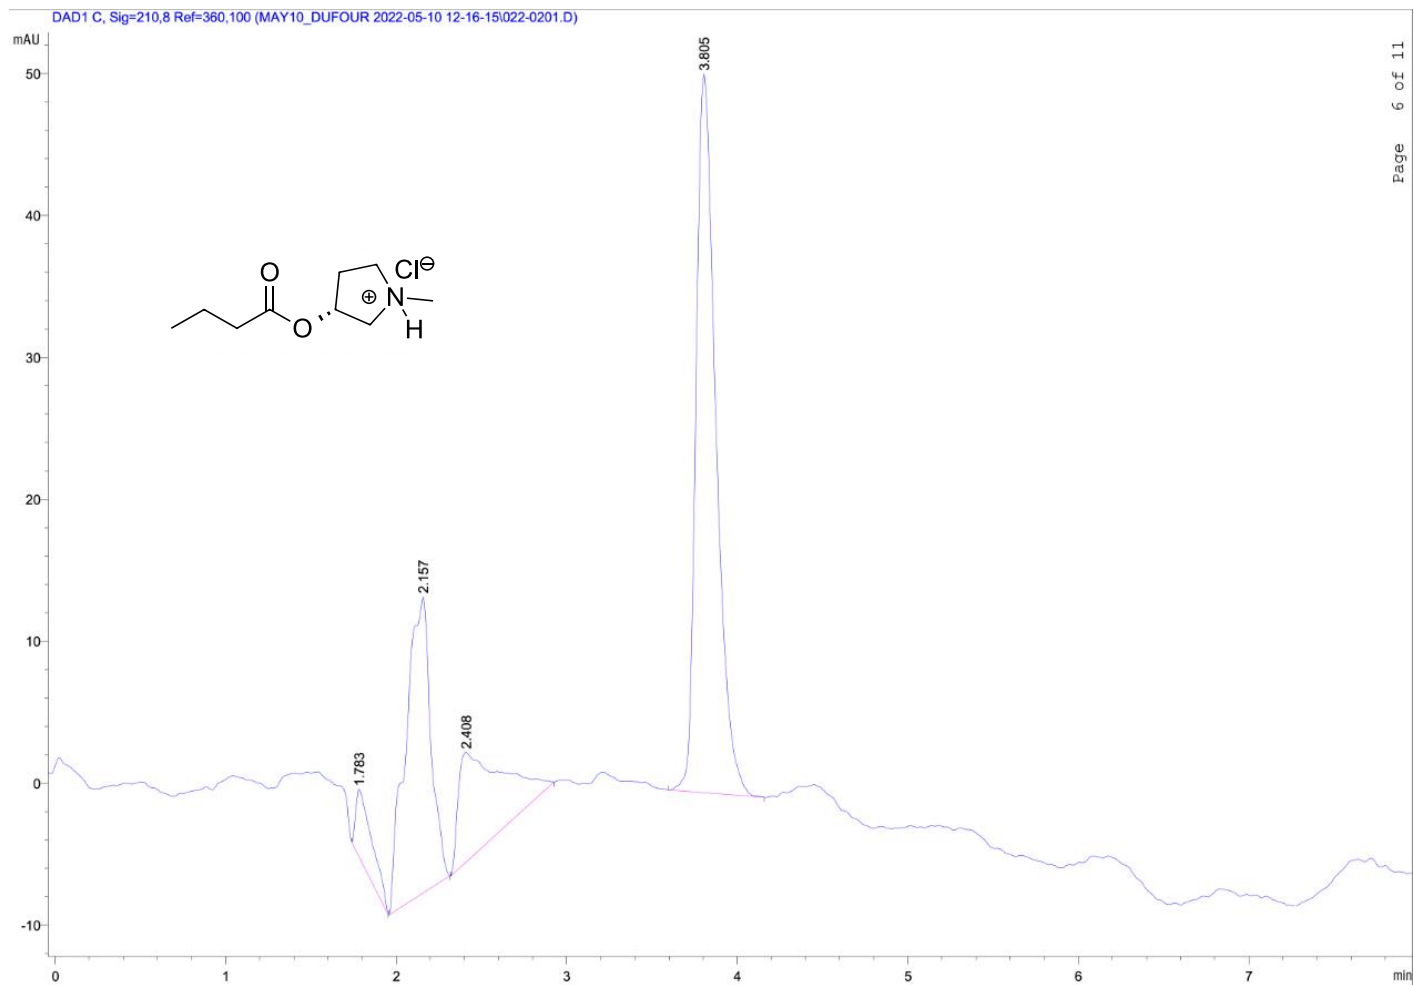

## *Aryl N-Methylpyrrolidinyl Derivatives*

(23) ((3*S*)-1-Methylpyrrolidin-3-yl) *p*-Iodobenzenecarbothioate Oxylate

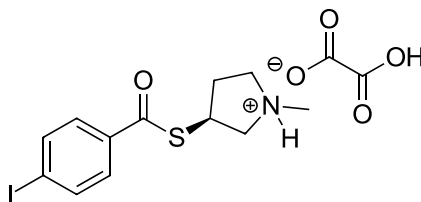

*Synthesis: (3*R*)-3-(Mesyloxy)-1-methylpyrrolidine:* (*R*)-(-)-1-Methyl-3-pyrrolidinol (6.00 mL, 54.6 mmol) was dissolved in anhydrous dichloromethane (180 mL) and cooled to 0°C with an ice bath. Triethylamine (11.4 mL, 81.9 mmol) and methanesulfonyl chloride (4.90 mL, 62.8 mmol) were added dropwise at 0°C. The ice bath was removed after 5 mins, and the reaction was stirred overnight. Brine (50 mL) was added to the reaction and the layers were separated. The aqueous layer was extracted with dichloromethane (3 × 15 mL). The combined organic layers were dried over Na<sub>2</sub>SO<sub>3</sub>, gravity filtered, and the filtrate was concentrated *in vacuo* to produce a yellow viscous liquid (6.11 g, 54%). Product confirmed by <sup>1</sup>H NMR and the crude material was immediately carried through to next step without further purification.

**(3*S*)-S-(1-Methylpyrrolidin-3-yl) ethanethioate:** (*3R*)-3-(Mesyloxy)-1-methylpyrrolidine (6.11 g, 34.1 mmol), was dissolved in anhydrous THF (114 mL) under an argon atmosphere. 18-crown-6-ether (9.91 g, 37.5 mmol) was added followed by potassium thioacetate (4.29 g, 37.5 mmol), added in 3 portions. Once all potassium thioacetate had gone into solution, the reaction was heated to 30°C and left overnight. The reaction was gravity filtered, the filtrate diluted with water (50 mL) and it was extracted with EtOAc (3 × 15 mL). The combined organic layers were washed with water (3 × 20 mL) and brine (3 × 20 mL), dried over Na<sub>2</sub>SO<sub>3</sub>, gravity filtered, and concentrated *in vacuo* to produce a red oil. The crude material was then distilled to give (*3S*)-S-(1-methylpyrrolidin-3-yl) ethanethioate as a yellow oil (2.33 g, 37%). The product was confirmed by <sup>1</sup>H NMR.

**(*S*)-1-Methyl-3-pyrrolidinethiol:** (*3S*)-S-(1-Methylpyrrolidin-3-yl) ethanethioate (0.442g, 2.77 mmol) was dissolved in MeOH (10 mL) and sodium methoxide (0.155 g, 2.78 mmol) was added to the stirring solution. After all starting material was shown to be consumed by TLC

experiment, the MeOH was removed *in vacuo* and the resulting material was washed with DCM and concentrated twice. This material was used immediately in the next step.

**((3*S*)-1-Methylpyrrolidin-3-yl) *p*-iodobenzenethioate:** (*S*)-1-Methyl-3-pyrrolidinethiol from the previous step was dissolved in dichloromethane (10 mL) and cooled to 0°C using an ice bath. 4-Iodobenzoyl chloride (0.740 g, 2.78 mmol) was added followed by triethylamine (0.774 mL, 5.55 mmol). The ice bath was removed after 30 mins and the reaction was left overnight. The next morning the solvent was removed *in vacuo*. The crude material was washed with diethyl ether, gravity filtered to remove all precipitate, and the filtrate was concentrated *in vacuo* to give a white solid. This material recrystallized with methanol and isopropanol to give a white solid (0.727 g).

**((3*S*)-1-Methylpyrrolidin-3-yl) *p*-Iodobenzenecarbothioate Oxylate:** ((3*S*)-1-Methylpyrrolidin-3-yl) *p*-iodobenzenethioate (0.600 g, 1.73 mmol) was completely dissolved in isopropanol (32.5 mL). With stirring, oxalic acid (0.156 g, 1.73 mmol) was added and stirred for 3 hrs at room temperature. The solution was concentrated *in vacuo* to give a white solid and immediately recrystallized with isopropanol. For further purification, this material was recrystallized from methanol to give ((3*S*)-1-methylpyrrolidin-3-yl) *p*-iodobenzenecarbothioate oxylate as a white solid (0.357 g, 47%).

*Spectroscopic Data:* IR(ATR): 3041, 2718, 2564, 1714, 1697, 1578, 909 cm<sup>-1</sup>; <sup>1</sup>H NMR (400 MHz, DMSO-*d*<sub>6</sub>) δ 7.97-7.95 (m, 2H), 7.66-7.64 (m, 2H), 4.51 (br s, 2H, overlapping with H<sub>2</sub>O in DMSO), 4.26-4.19 (m, 1H), 3.71 (dd, J = 11.7, 8.1 Hz, 1H), 3.36-3.30 (m, 1H), 3.26-3.21 (m, 2H), 2.77 (s, 3H), 2.58-2.52 (m, 1H), 2.06-1.97 (m, 1H); <sup>13</sup>C NMR (100.7 MHz, DMSO-*d*<sub>6</sub>) δ 190.3 (0), 164.3 (0), 138.9 (1), 135.1 (0), 128.5 (1), 103.0 (0), 59.7 (2), 54.1 (2), 40.4 (3), 38.6 (1), 30.0 (2); HRMS (ESI<sup>+</sup>): calculated for C<sub>12</sub>H<sub>15</sub>INOS<sup>+</sup>: 347.9913; found for C<sub>12</sub>H<sub>15</sub>INOS<sup>+</sup>: 347.9912; HPLC purity at 254nm (75% CH<sub>3</sub>CN : 10% CH<sub>3</sub>OH : 15% aqueous triethylamine [0.1% triethylamine in H<sub>2</sub>O], retention time 8.245 mins): 97.2 %.

(23) ((3*S*)-1-Methylpyrrolidin-3-yl) *p*-Iodobenzenecarbothioate Oxylate IR(ATR)

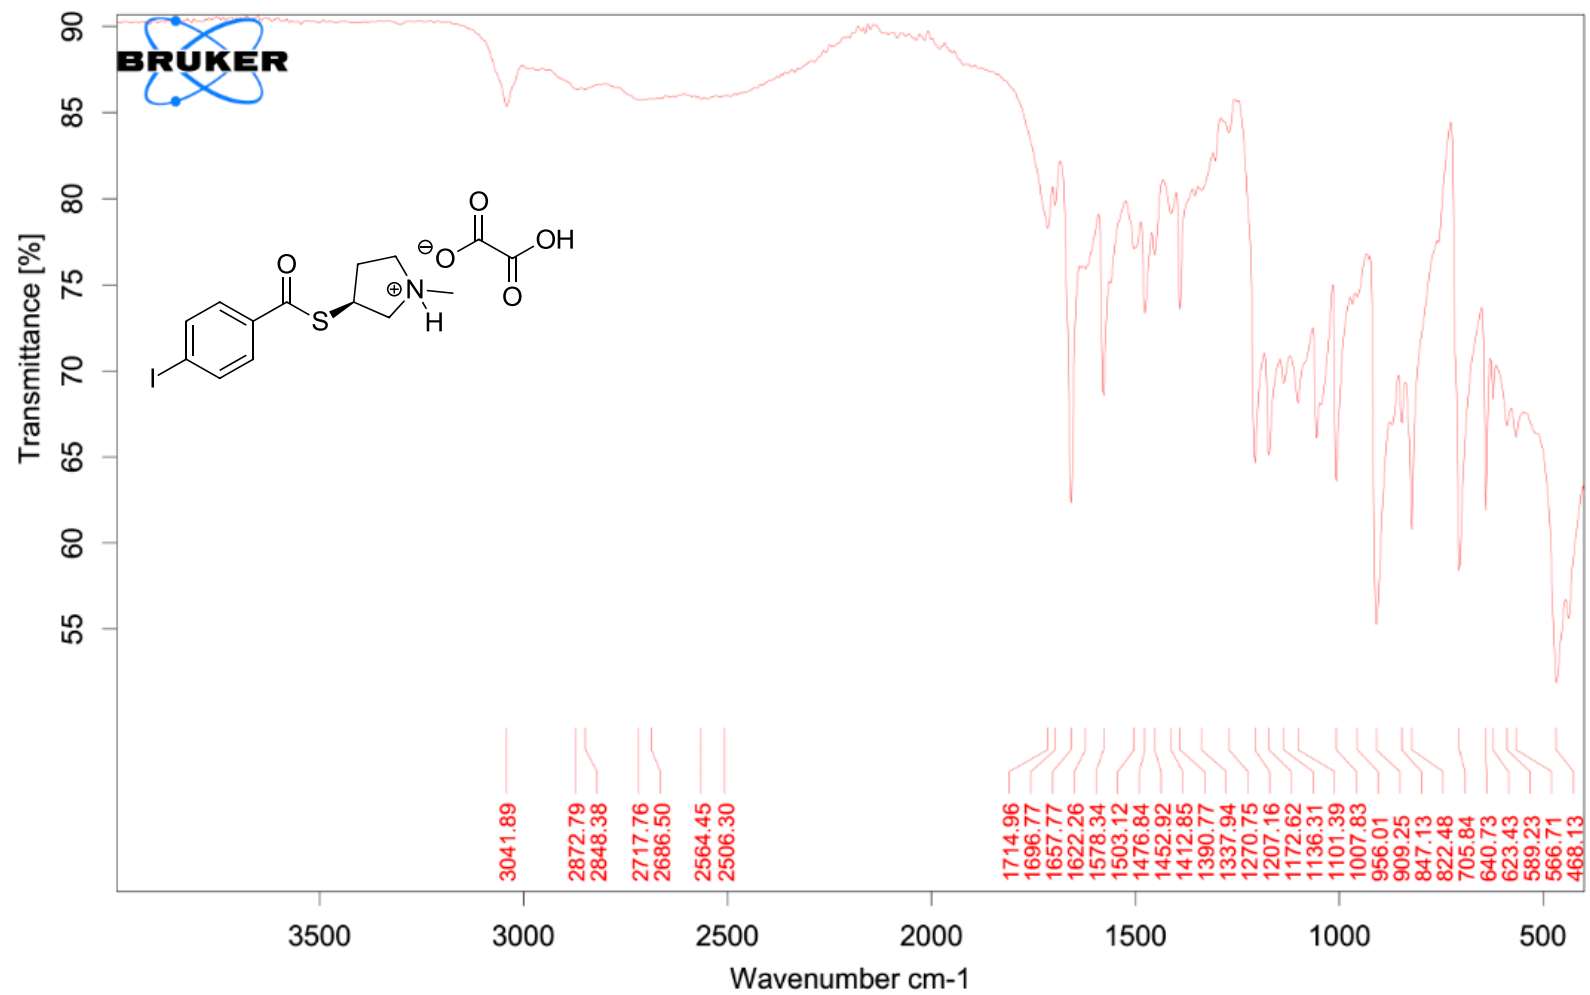

(23) ((3S)-1-Methylpyrrolidin-3-yl) *p*-Iodobenzenecarbothioate Oxylate <sup>1</sup>H NMR 400 MHz (DMSO-*d*<sub>6</sub>)

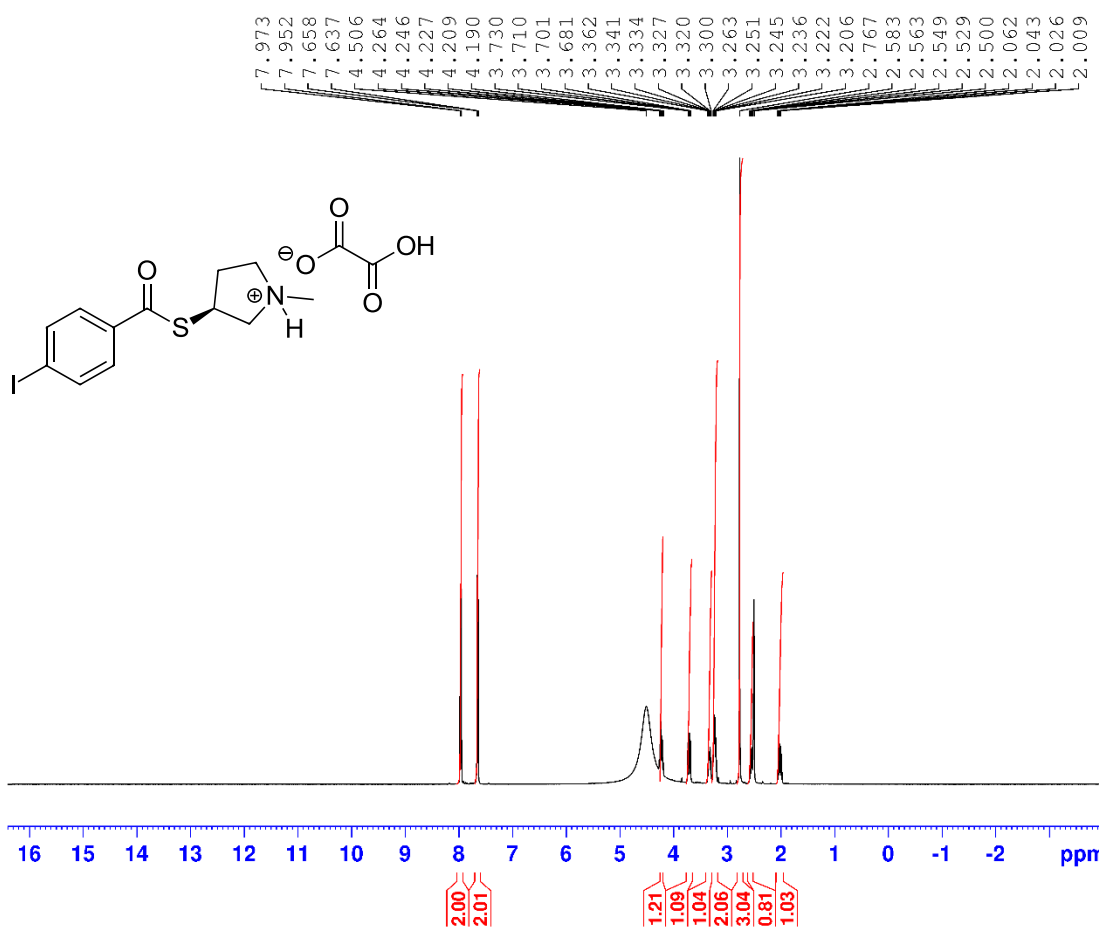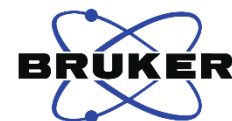

Current Data Parameters  
NAME MD-2-101 DMSO  
EXPNO 1  
PROCNO 1

F2 - Acquisition Parameters  
Date\_ 20221021  
Time 14.20 h  
INSTRUM AVN 400  
PROBHD Z163739\_QC38 (   
PULPROG zg30  
TD 65536  
SOLVENT DMSO  
NS 16  
DS 2  
SWH 8196.722 Hz  
FIDRES 0.250144 Hz  
AQ 3.9976959 sec  
RG 101  
DW 61.000 usec  
DE 13.55 uscc  
TE 298.0 K  
D1 1.0000000 sec  
fDO 1  
SFO1 400.3024719 MHz  
NUC1 1H  
PC 3.33 usec  
PI 9.98 usec  
PLW1 14.13000011 W

F2 - Processing parameters  
SI 65536  
SF 400.3000000 MHz  
WDW EM  
SSB 0  
LB 0.30 Hz  
GB 0  
PC 1.00

(23) ((3*S*)-1-Methylpyrrolidin-3-yl) *p*-Iodobenzenecarbothioate Oxylate <sup>13</sup>C NMR 100 MHz (DMSO-*d*<sub>6</sub>)

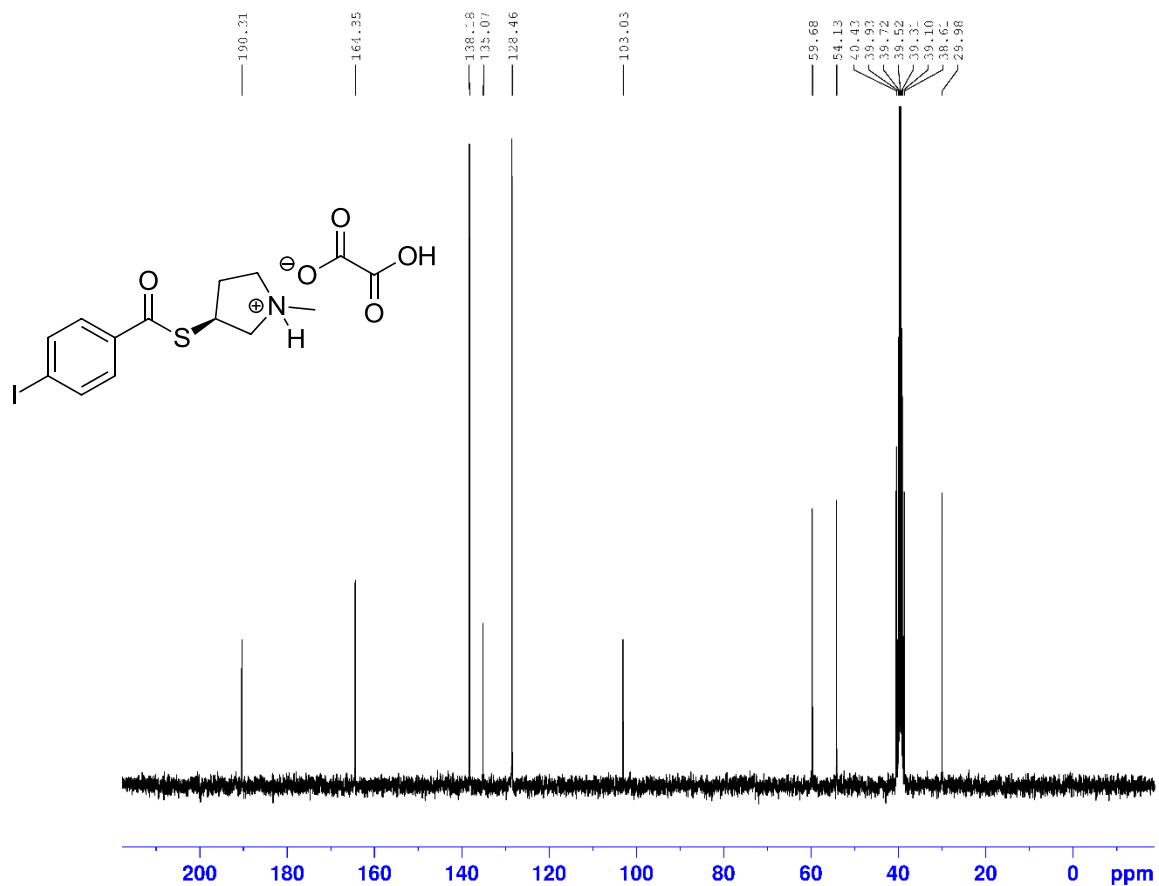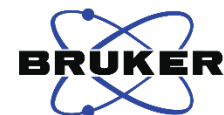

```

Current Data Parameters
NAME      MD-2-101 DMSO
EXPNO    2
PROCNO   1

F2 - Acquisition Parameters
Date_    20221021
Time     14.54 h
INSTRUM  AVN 400
PROBHD   Z163739_0035 (
PULPROG  ucaft
TD        21424
SOLVENT  DMSO
NS        384
DS         8
SWH       23809.523 Hz
FIDRES    2.222696 Hz
AQ         0.4499040 sec
RG         19.1372
DW         21.000 usec
DE         6.50 usec
TE         298.0 K
D1         4.0000000 sec
D12        0.00002000 sec
D20        20.00000000 sec
T20        1
SFO1      100.6555806 MHz
NUC1       13C
P1         10.00 usec
P13        2000.00 usec
P26         500.00 usec
PLW1       58.86998893 W
SPNAM[5]   Crp60comp.4
SFOA15     0.500
SPOFFS5    0 Hz
SPW5       8.99470043 W
SPNAM[8]   Crp60,0.5,20.1
SFOA18     0.500
SPOFFS8    0 Hz
SPW8       8.99470043 W
SFO2       400.3016012 MHz
NUC2        1H
CPDPRG[2]  waltz265
PCPD2      90.00 usec
PLW2       14.12000011 W
PLW12      0.17375000 W

F2 - Processing parameters
SI         131072
SF         100.6555609 MHz
WDW        EM
SSB         0
LB         2.00 Hz
GB         0
PC         1.40
    
```

(23) ((3S)-1-Methylpyrrolidin-3-yl) *p*-Iodobenzenecarbothioate Oxylate High Resolution Mass Spectrum (ESI, positive mode)

### Mass Spectrum SmartFormula Report

**Analysis Info**

Analysis Name D:\Data\Xiao\Nov 01 2022\2000004.d  
Method Xiao all 1.m  
Sample Name TRV 6025  
Comment

Acquisition Date 2022-11-01 2:53:21 PM  
Operator x  
Instrument compact 8255754.20059

**Acquisition Parameter**

|             |            |                      |          |                  |           |
|-------------|------------|----------------------|----------|------------------|-----------|
| Source Type | ESI        | Ion Polarity         | Positive | Set Nebulizer    | 0.5 Bar   |
| Focus       | Not active | Set Capillary        | 3500 V   | Set Dry Heater   | 180 °C    |
| Scan Begin  | 50 m/z     | Set End Plate Offset | -500 V   | Set Dry Gas      | 4.0 l/min |
| Scan End    | 1500 m/z   | Set Charging Voltage | 2000 V   | Set Divert Valve | Source    |
|             |            | Set Corona           | 0 nA     | Set APCI Heater  | 0 °C      |

| Meas. m/z | Ion Formula                          | m/z      | err [ppm] |
|-----------|--------------------------------------|----------|-----------|
| 347.9912  | C <sub>12</sub> H <sub>15</sub> INOS | 347.9914 | 0.4       |

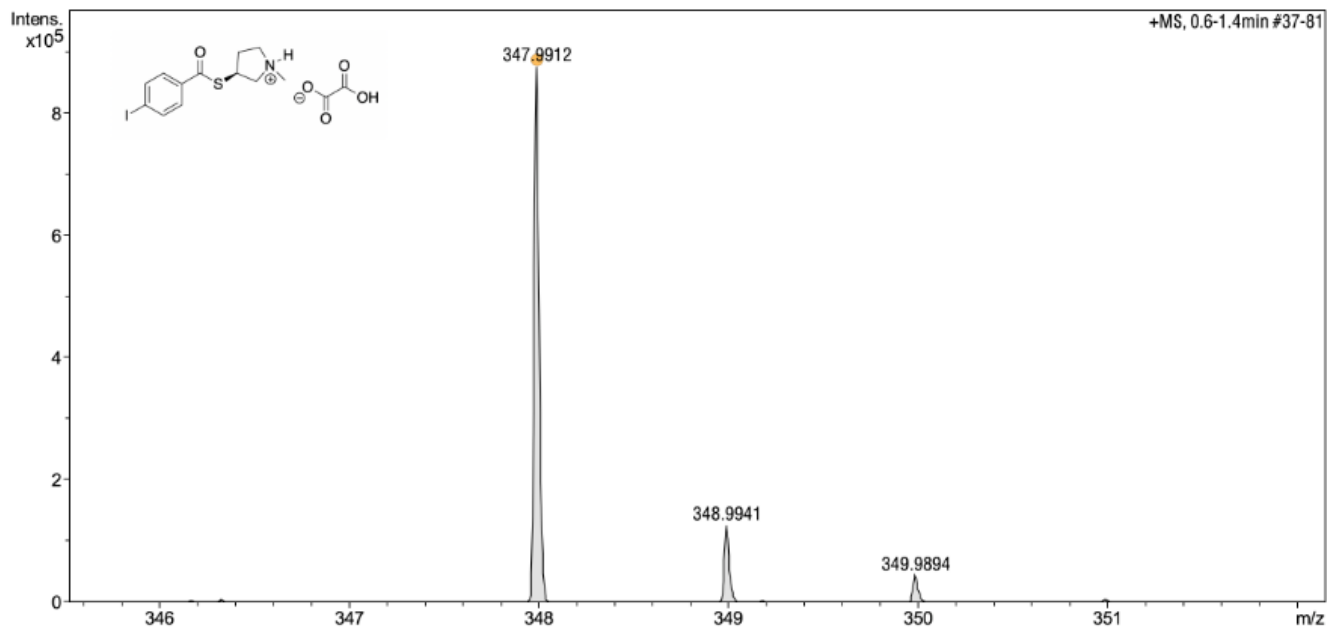

**(23)** ((3*S*)-1-Methylpyrrolidin-3-yl) *p*-Iodobenzenecarbothioate

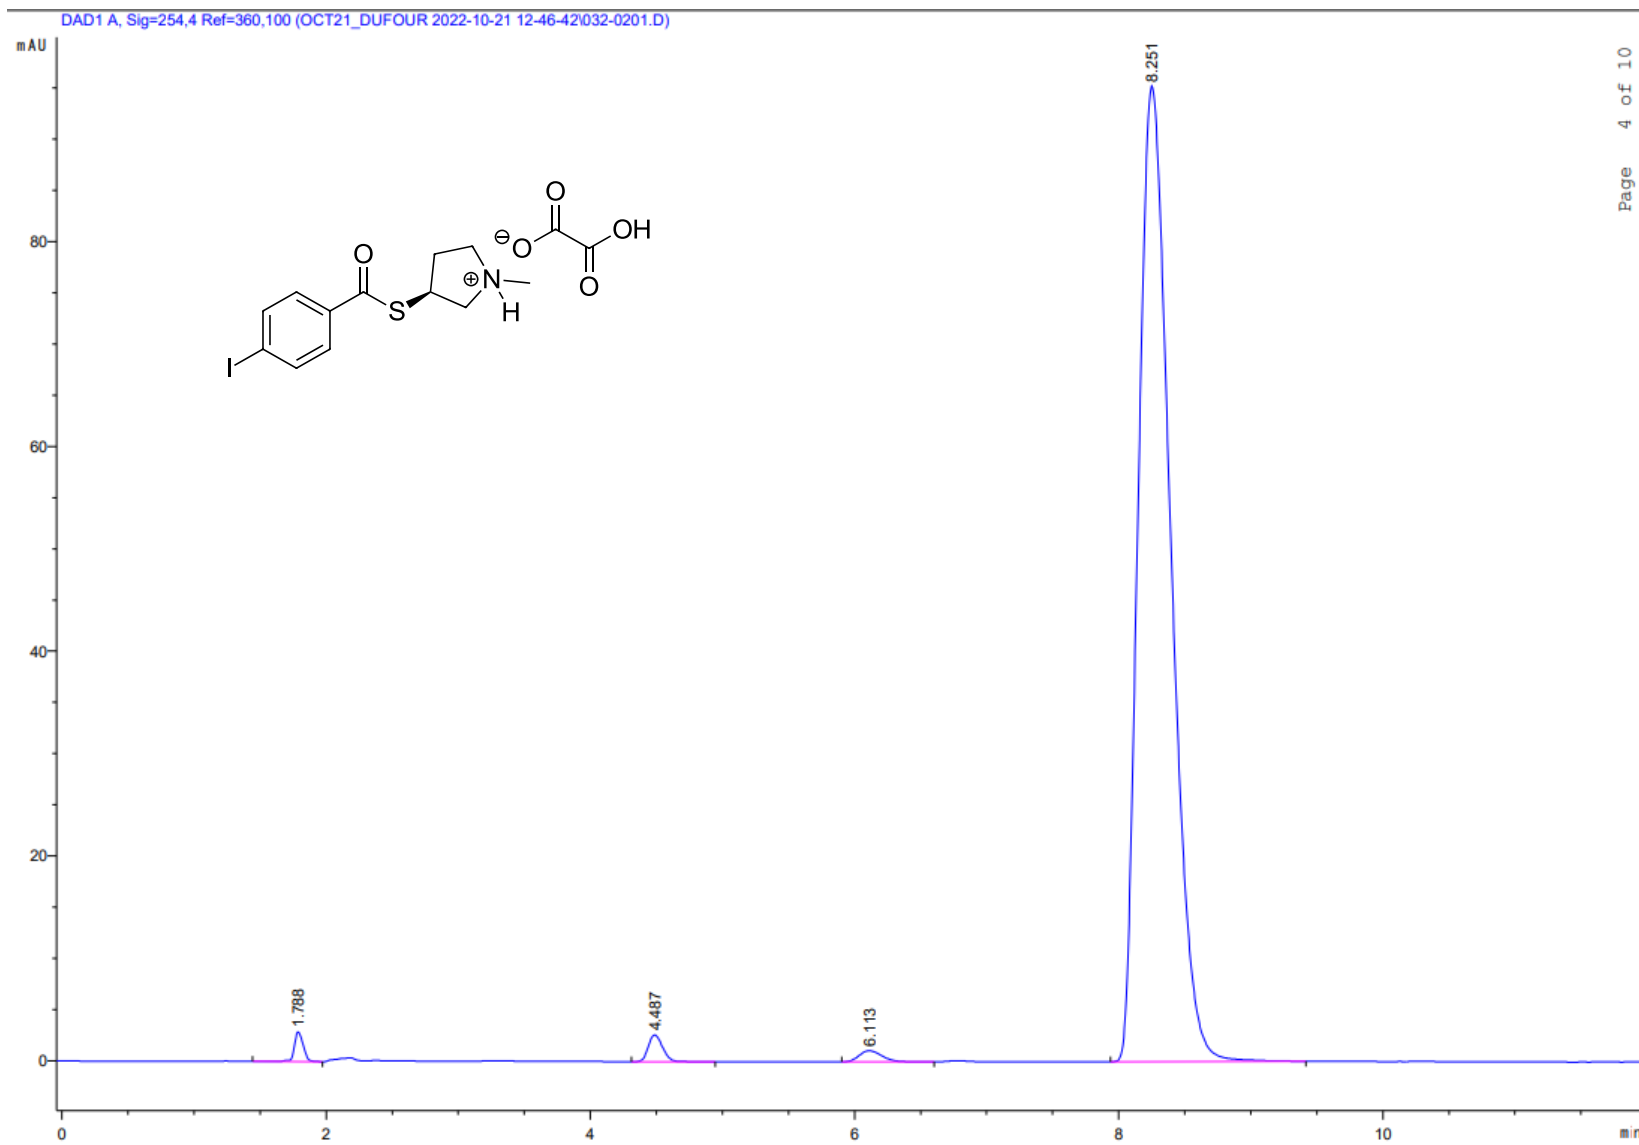



**(24) (3S)-3-(p-Iodobenzoyloxy)-1-methyl-1-pyrrolidinium Chloride**

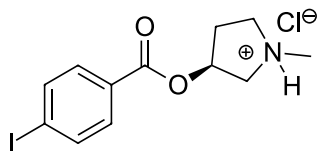

**Synthesis: (3S)-1-Methyl-3-pyrrolidinyl p-iodobenzoate:** 4-Iodobenzoyl chloride (0.799 g, 3.00 mmol), triethylamine (1.05 mL, 7.50 mmol) and 4-dimethylaminopyridine (DMAP) (0.0659 g, 0.54 mmol) were dissolved in anhydrous dichloromethane (20 mL) under an argon atmosphere. (S)-(+)-1-Methyl-3-pyrrolidinol (0.329 mL, 3.00 mmol) was added at 0°C. The ice bath was removed after 5 min, and the reaction was stirred for 3h at room temperature. The reaction was quenched with brine (20 mL), extracted with dichloromethane (3 x 15 mL) and the combined organic layers were dried over Na<sub>2</sub>SO<sub>3</sub>. After the drying agent was removed *via* filtration the solvent was removed *in vacuo* to produce a white solid. The crude mixture was purified by silica gel column chromatography (5% MeOH/DCM) to afford (3S)-1-methyl-3-pyrrolidinyl p-iodobenzoate (0.274 g, 28%) as a white solid. The analytical data was similar to previously published data.<sup>[7]</sup>

**(3S)-3-(p-Iodobenzoyloxy)-1-methyl-1-pyrrolidinium chloride:** (3S)-1-Methyl-3-pyrrolidinyl p-iodobenzoate (0.136 g, 0.410 mmol) was dissolved in anhydrous diethyl ether (9 mL) under an argon atmosphere. HCl in diethyl ether (1 N - 0.62 mL, 0.620 mmol) was added dropwise resulting in the immediate formation of a white precipitate. The reaction was stirred for an additional 60 mins. The precipitate was collected *via* suction filtration, washed with Et<sub>2</sub>O (2 x 10 mL), to afford (3S)-3-(p-Iodobenzoyloxy)-1-methyl-1-pyrrolidinium chloride, (0.100 mg, 66% yield) as a white solid.

**Spectroscopic data:** MP<sub>(diethyl ether)</sub>: 243-245°C; IR (ATR) 3005, 2931, 2897, 2574, 2472, 1714, 1586, 1269, 1102, 753; <sup>1</sup>H NMR (400 MHz, D<sub>2</sub>O) δ 7.93-7.91 (m, 2H), 7.75-7.72 (m, 2H), 5.68 (br app s, 1H), 3.80-3.70 (m, 3H), 3.50 (br app s, 1H), 3.03 (s, 3H), 2.69-2.60 (m, 1H), 2.45-2.39 (m, 1H); <sup>13</sup>C NMR (100.7 MHz, D<sub>2</sub>O) δ 167.7 (0), 138.7 (1), 131.5 (1), 128.9 (0), 102.3 (0), 74.7 (1), 61.1 (2), 55.1 (2), 42.0 (2), 31.1 (2); LRMS (ESI<sup>+</sup>): 332.0 (M<sup>+</sup>); HRMS (ESI<sup>+</sup>): calculated for C<sub>12</sub>H<sub>15</sub>INO<sub>2</sub><sup>+</sup>: 332.0142; found for C<sub>12</sub>H<sub>15</sub>INO<sub>2</sub><sup>+</sup>: 332.0133; HPLC purity at 254 nm (75%

CH<sub>3</sub>CN : 10% CH<sub>3</sub>OH, 15 % aqueous triethylamine (0.1 % triethylamine in water) retention time: 5.723 mins): >99%.

(24) (3*S*)-3-(*p*-Iodobenzoyloxy)-1-methyl-1-pyrrolidinium Chloride IR(ATR)

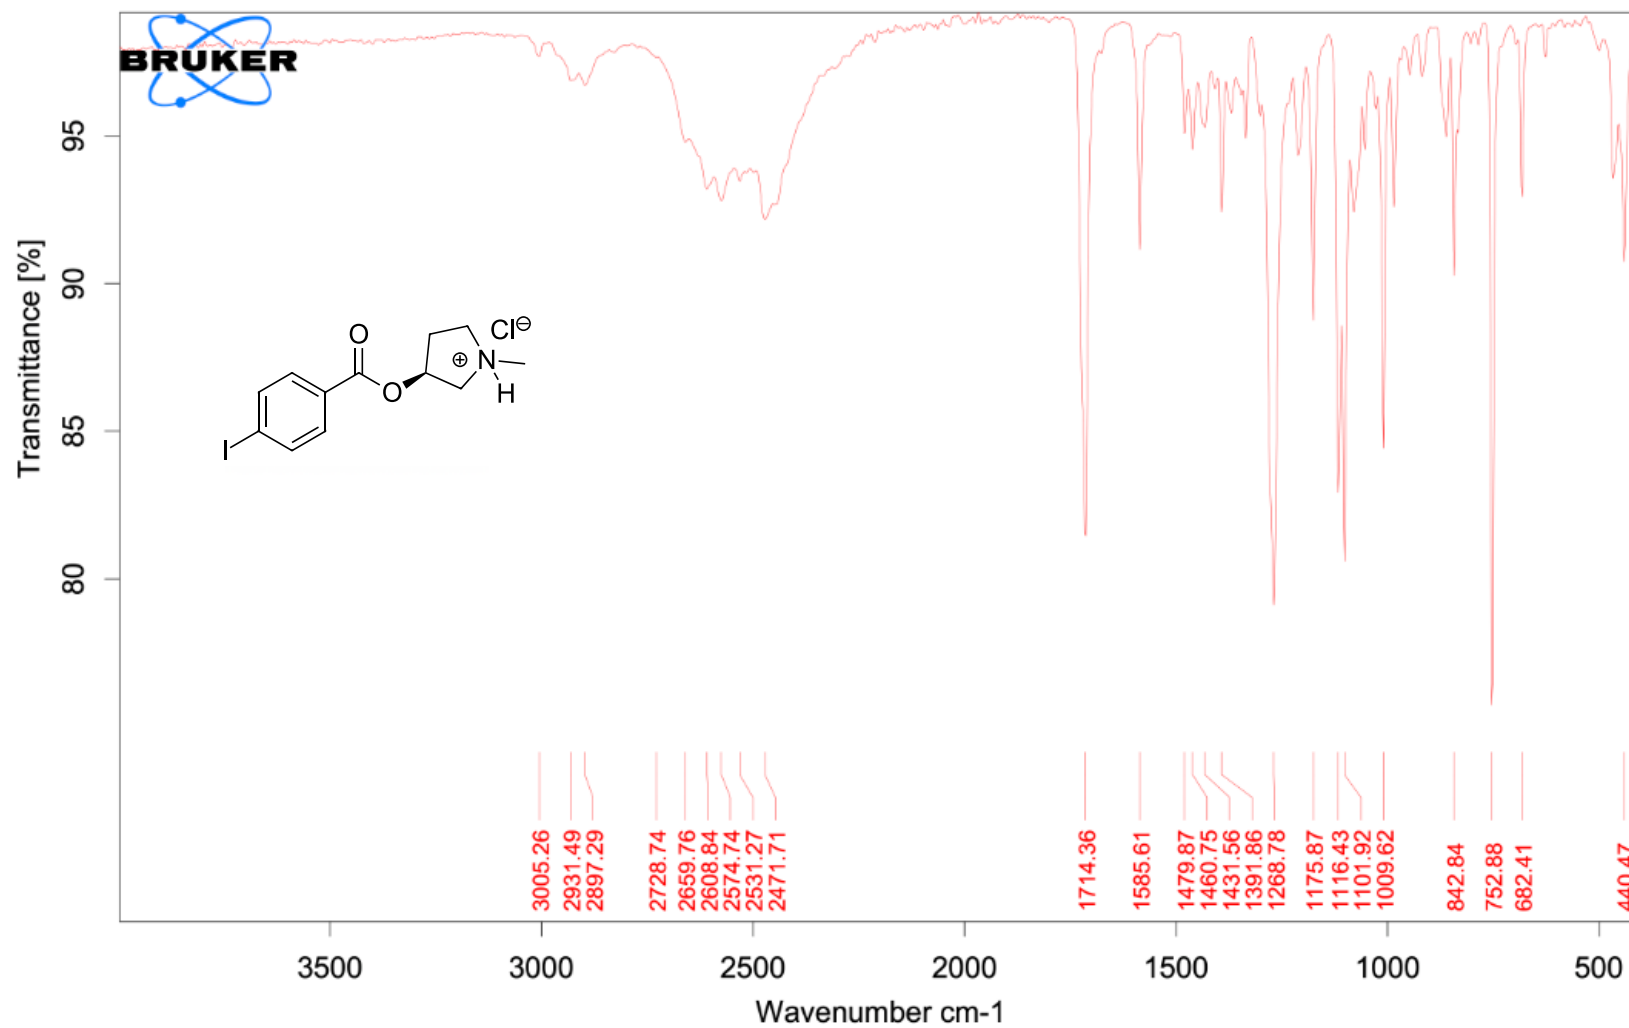

(24) (3S)-3-(*p*-Iodobenzoyloxy)-1-methyl-1-pyrrolidinium Chloride <sup>1</sup>H NMR 400 MHz (D<sub>2</sub>O)

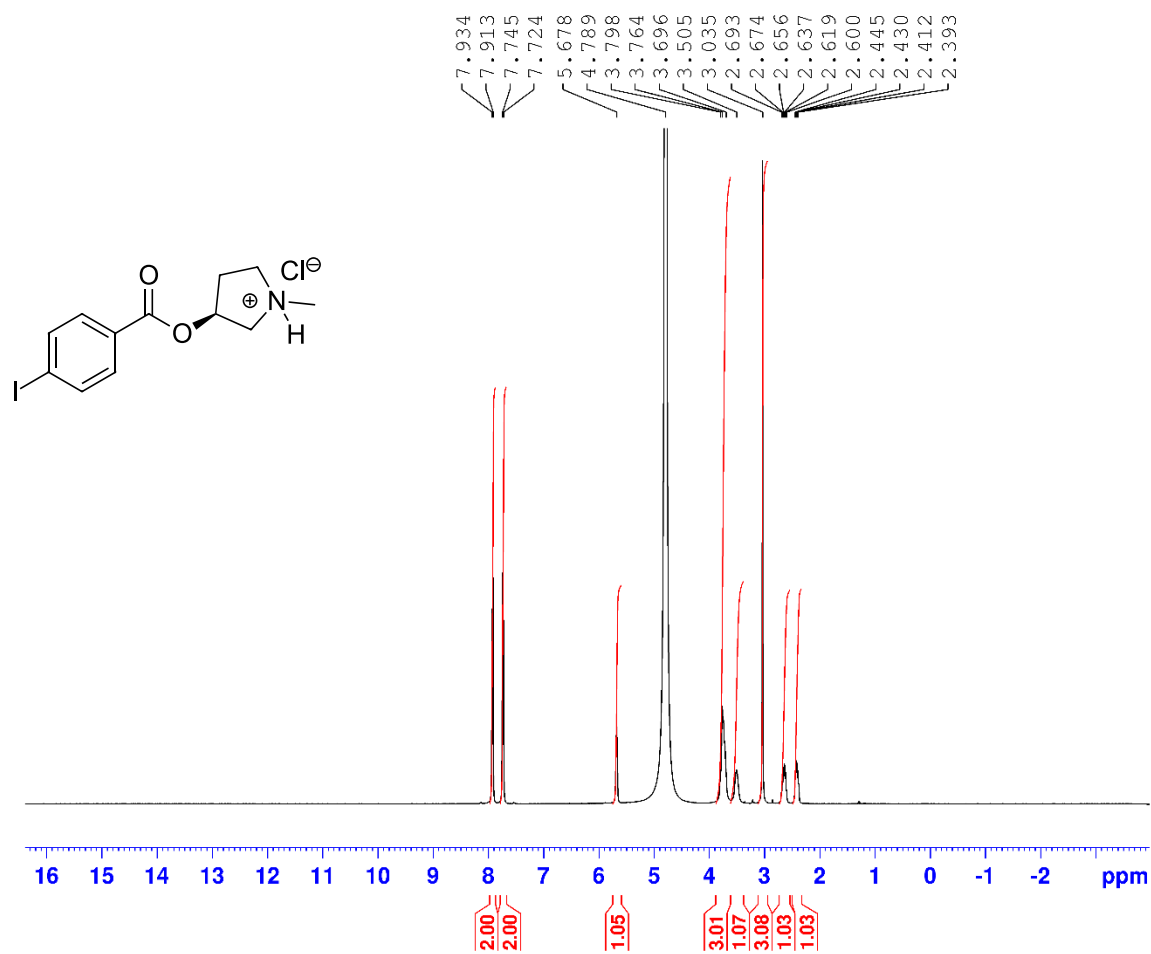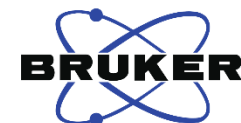

Current Data Parameters  
NAME SB-1-104  
EXPNO 8  
PROCNO 1

F2 - Acquisition Parameters  
Date\_ 20220412  
Time 11.11 h  
INSTRUM AVN 400  
PROBHD Z163739\_0038 (  
PULPROG zg30  
TD 65536  
SOLVENT D2O  
NS 64  
DS 2  
SWH 8196.722 Hz  
FIDRES 0.250144 Hz  
AQ 3.9976959 sec  
RG 66.6667  
DW 61.000 usec  
DE 13.54 usec  
TE 298.0 K  
D1 1.00000000 sec  
TD0 1  
SF01 400.3024719 MHz  
NUCL 1H  
P0 3.33 usec  
P1 10.00 usec  
PLWL 14.12800026 W

F2 - Processing parameters  
SI 65536  
SF 400.2999656 MHz  
WDW EM  
SSB 0  
LB 0.30 Hz  
GB 0  
PC 1.00

(24) (3S)-3-(p-Iodobenzoyloxy)-1-methyl-1-pyrrolidinium Chloride <sup>13</sup>C UDEFT NMR 100 MHz (D<sub>2</sub>O)

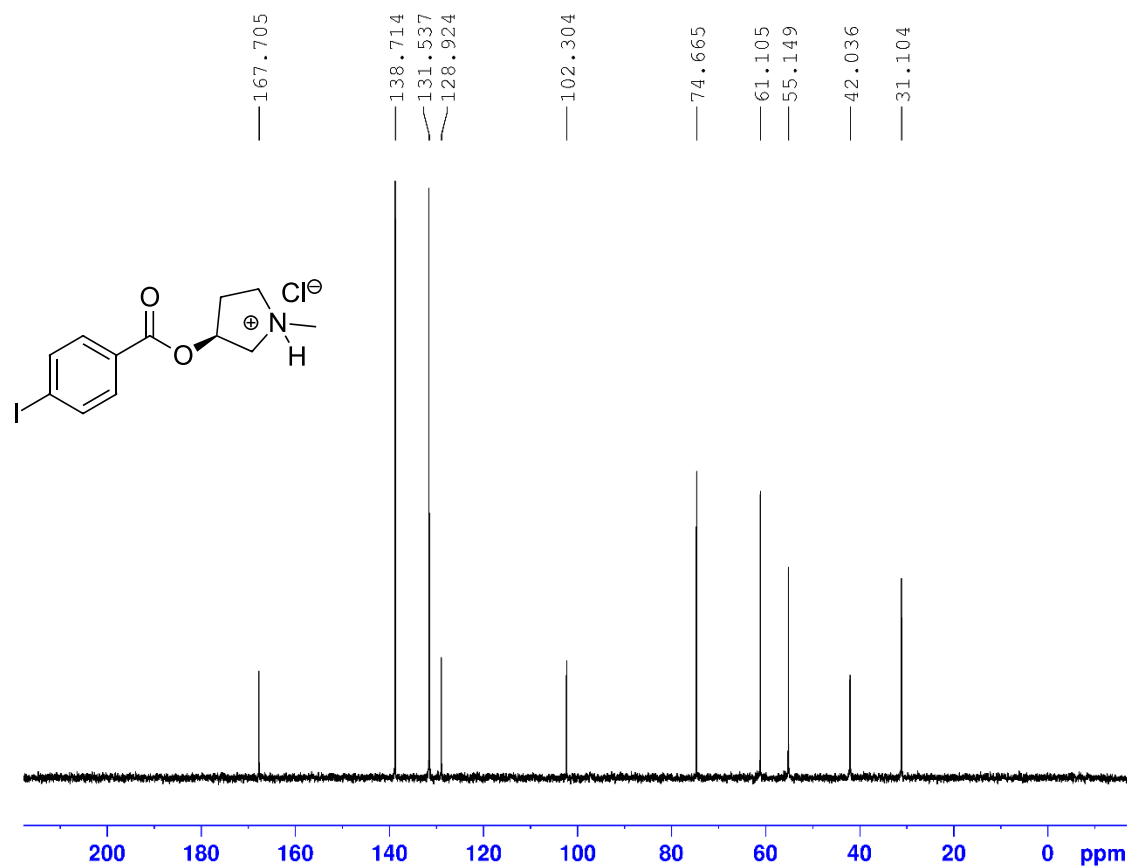

Current Data Parameters  
NAME SB-1-104  
EXPNO 9  
PROCNO 1

F2 - Acquisition Parameters  
Date\_ 20220415  
Time 4.05 h  
INSTRUM AVN 400  
PROBHD Z163739\_0038 (  
PULPROG udeft  
TD 21424  
SOLVENT D2O  
NS 2304  
DS 8  
SWH 23809.523 Hz  
FIDRES 2.222696 Hz  
AQ 0.4499040 sec  
RG 22.6702  
DW 21.000 usec  
DE 6.500 usec  
TE 298.0 K  
D1 4.0000000 sec  
D12 0.0000200 sec  
D20 20.0000000 sec  
TD0 1  
SFO1 100.6655806 MHz  
NUC1 13C  
P1 10.00 usec  
P13 2000.00 usec  
P26 500.00 usec  
PLW1 58.86999893 W  
SPNAM[5] Crp60comp.4  
SPOA15 0.500  
SPOFFS5 0 Hz  
SPW5 8.99470043 W  
SPNAM[8] Crp60,0.5,20.1  
SPOA18 0.500  
SPOFFS8 0 Hz  
SPW8 8.99470043 W  
SFO2 400.3016012 MHz  
NUC2 1H  
CPDPRG[2] waltz65  
PCPD2 90.00 usec  
PLW2 14.12800026 W  
PLW12 0.17442000 W

F2 - Processing parameters  
SI 131072  
SF 100.6554448 MHz  
WDW EM  
SS3 0  
LB 2.00 Hz  
GB 0  
PC 1.40

(24) (3S)-3-(p-Iodobenzoyloxy)-1-methyl-1-pyrrolidinium Chloride High Resolution Mass Spectrum (ESI, positive mode)

### Mass Spectrum SmartFormula Report

**Analysis Info**

Analysis Name D:\Data\Xiao\July 07 2022\000021.d  
Method Xiao all 1.m  
Sample Name TRV 6002 HCl  
Comment

Acquisition Date 7/7/2022 11:30:06 AM  
Operator x  
Instrument compact 8255754.20059

**Acquisition Parameter**

|             |            |                      |          |                  |           |
|-------------|------------|----------------------|----------|------------------|-----------|
| Source Type | ESI        | Ion Polarity         | Positive | Set Nebulizer    | 0.5 Bar   |
| Focus       | Not active | Set Capillary        | 3500 V   | Set Dry Heater   | 181 °C    |
| Scan Begin  | 50 m/z     | Set End Plate Offset | -500 V   | Set Dry Gas      | 4.0 l/min |
| Scan End    | 1500 m/z   | Set Charging Voltage | 2000 V   | Set Divert Valve | Source    |
|             |            | Set Corona           | 0 nA     | Set APCI Heater  | 0 °C      |

| Meas. m/z | Ion Formula                                      | m/z      | err [ppm] |
|-----------|--------------------------------------------------|----------|-----------|
| 332.0133  | C <sub>12</sub> H <sub>15</sub> INO <sub>2</sub> | 332.0142 | 2.7       |

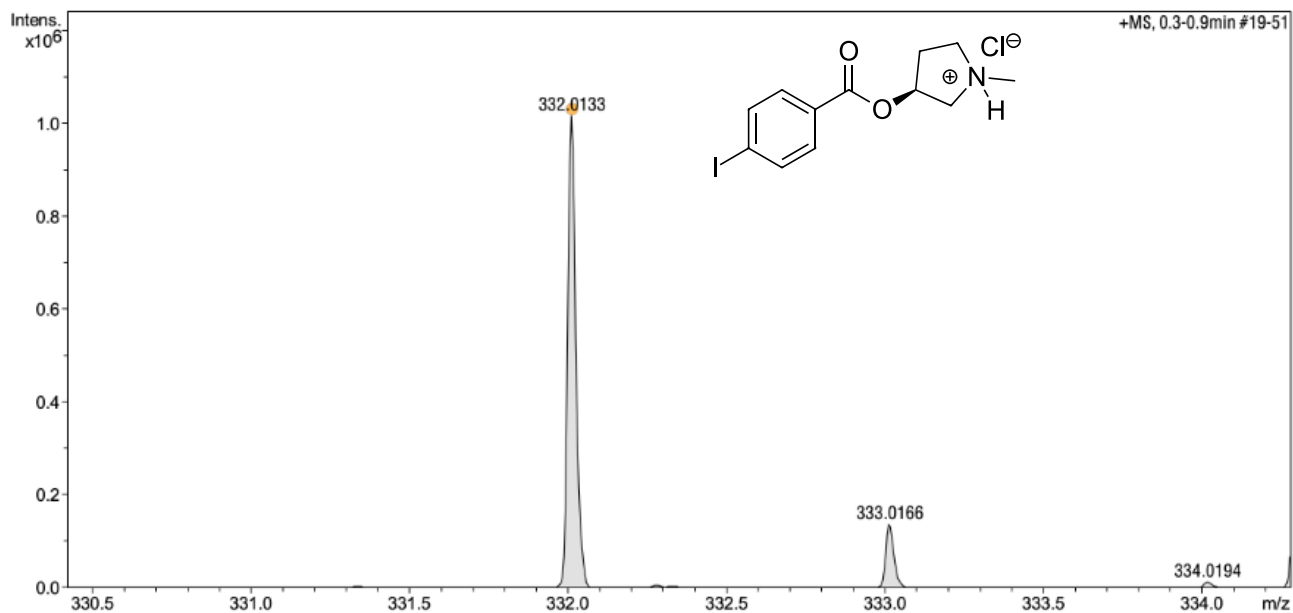

July 07 2022\000021.d

Bruker Compass DataAnalysis 4.3

printed: 7/7/2022 11:35:57 AM

by: x

Page 1 of 1

(24) (3*S*)-3-(*p*-Iodobenzoyloxy)-1-methyl-1-pyrrolidinium Chloride HPLC

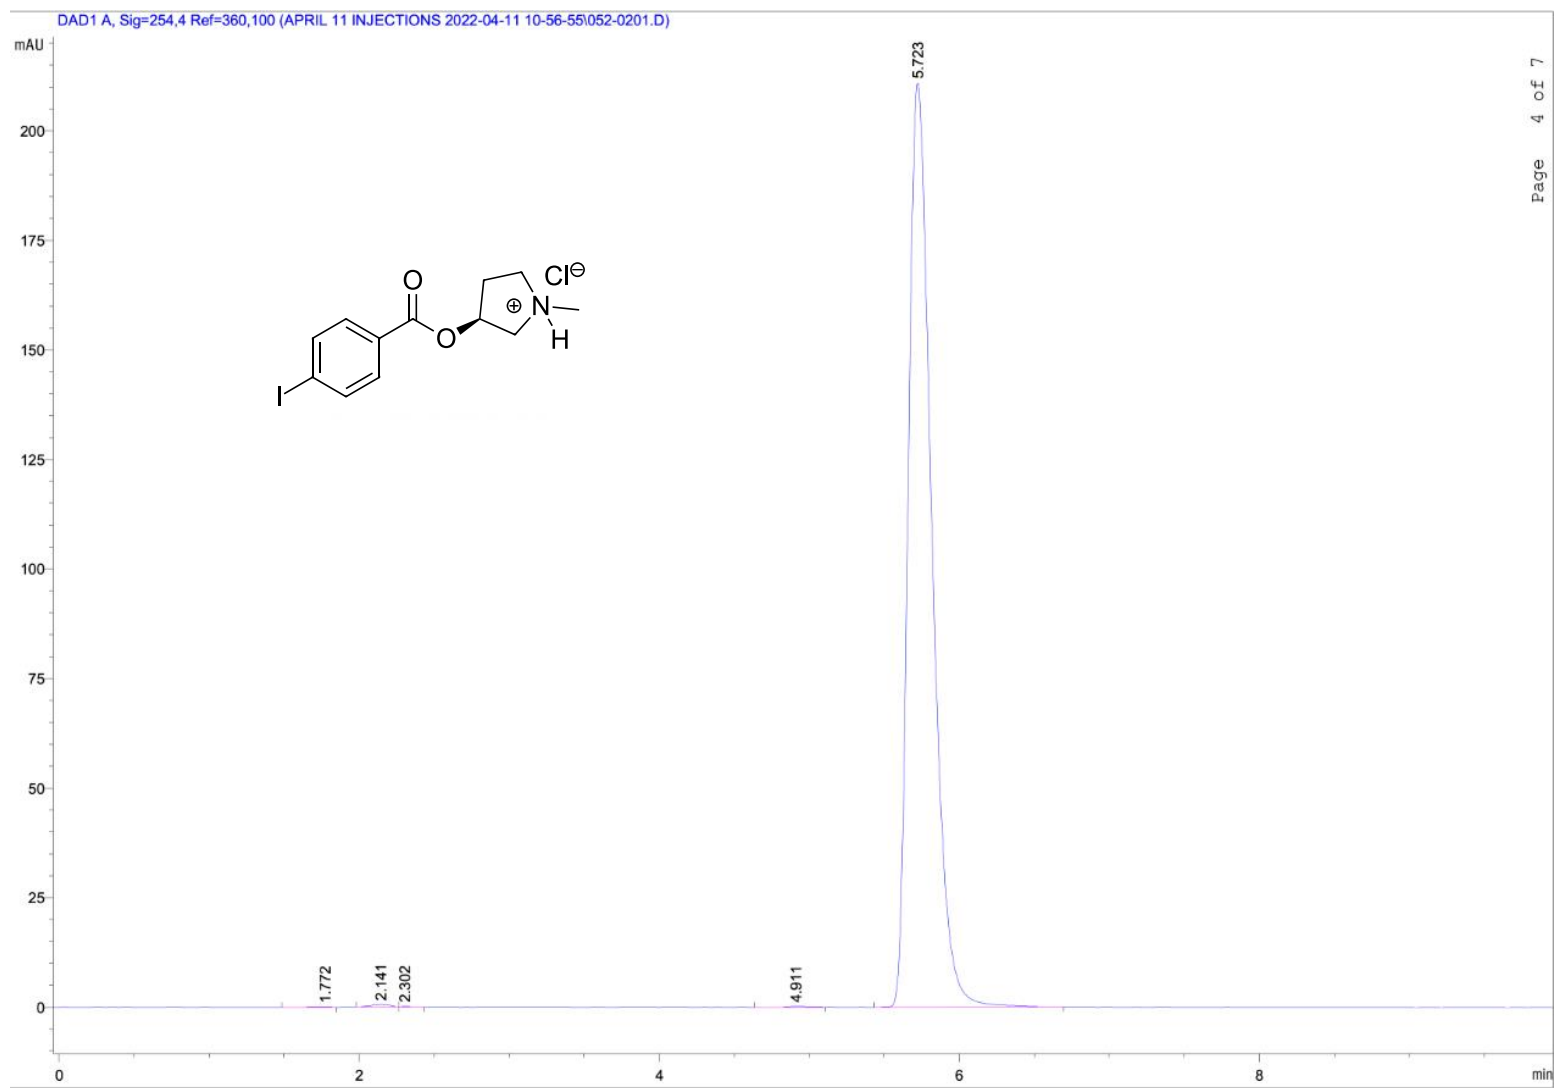

**(25)** ((3*S*)-1-Methylpyrrolidin-3-yl) *p*-Fluorobenzenecarbothioate Oxylate

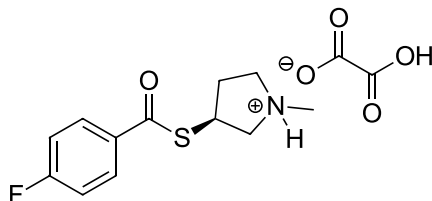

**Synthesis: (3*R*)-3-(Mesyloxy)-1-methylpyrrolidine:** (*R*)-(-)-1-Methyl-3-pyrrolidinol (6.00 mL, 54.6 mmol) was dissolved in anhydrous dichloromethane (180 mL) and cooled to 0°C with an ice bath. Triethylamine (11.4 mL, 81.9 mmol) and methanesulfonyl chloride (4.90 mL, 62.8 mmol) were added dropwise at 0°C. The ice bath was removed after 5 min, and the reaction was stirred overnight. Brine (50 mL) was added to the reaction and the layers were separated. The aqueous layer was extracted with dichloromethane (3 x 15 mL). The combined organic layers were dried over Na<sub>2</sub>SO<sub>3</sub>, gravity filtered, and the filtrate was concentrated *in vacuo* to produce a yellow viscous liquid (6.11 g, 54%). Product was confirmed by <sup>1</sup>H NMR and the crude material was immediately carried through to next step without further purification.

**(3*S*)-S-(1-Methylpyrrolidin-3-yl) ethanethioate:** (3*R*)-3-(Mesyloxy)-1-methylpyrrolidine (6.11 g, 34.1 mmol) was dissolved in anhydrous THF (114 mL) under an argon atmosphere. 18-crown-6-ether (9.91 g, 37.5 mmol) was added followed by potassium thioacetate (4.29 g, 37.5 mmol), added in 3 portions. Once all potassium thioacetate had gone into solution, the reaction was heated to 30°C and left overnight. The reaction was gravity filtered, the filtrate diluted with water (50 mL) and it was extracted with EtOAc (3 × 15 mL). The combined organic layers were washed with water (3 × 20 mL) and brine (3 × 20 mL), dried over Na<sub>2</sub>SO<sub>3</sub>, gravity filtered, and concentrated *in vacuo* to produce a red oil. The crude material was then distilled to give (3*S*)-S-(1-methylpyrrolidin-3-yl) ethanethioate as a yellow oil (2.33 g, 37 %). The product was confirmed by <sup>1</sup>H NMR and the material was immediately carried through to next step without further purification.

**(*S*)-1-Methyl-3-pyrrolidinethiol:** (3*S*)-S-(1-Methylpyrrolidin-3-yl) ethanethioate (0.344 g, 2.16 mmol) was dissolved in MeOH (11 mL) and sodium methoxide (0.120 g, 2.16 mmol) was added to the stirring solution. After all starting material was shown to be consumed by TLC



experiment, the MeOH was removed *in vacuo*. The resulting material was placed dichloromethane (20 mL) and concentrated *in vacuo*. This process was repeated, and the material was immediately used in the next step.

**((3S)-1-Methylpyrrolidin-3-yl) p-fluorobenzenethioate:** (S)-1-Methyl-3-pyrrolidinethiol was dissolved in dichloromethane (7 mL) and cooled to 0°C using an ice bath. 4-Fluorobenzoyl chloride (0.602 g, 4.32 mmol) was added followed by triethylamine (0.774 mL, 5.55 mmol). The ice bath was removed after 30 mins and warmed to room temperature. After all starting material was shown to be consumed by TLC experiment (developed using KMnO<sub>4</sub> stain), the reaction was concentrated *in vacuo*. The crude material was washed with diethyl ether, gravity filtered to remove all precipitate, and the filtrate was concentrated *in vacuo* to give a yellow oil (0.406 g).

**((3S)-1-Methylpyrrolidin-3-yl) p-fluorobenzenecarbothioate oxylate:** A portion of ((3S)-1-methylpyrrolidin-3-yl) p-fluorobenzenethioate (0.0324 g, 1.36 mmol) was completely dissolved in isopropanol (14 mL). With stirring, oxalic acid (0.220 g, 1.36 mmol) was added and stirred for 3 hrs at room temperature. The solution was concentrated *in vacuo* to give a white solid and immediately recrystallized from isopropanol to give ((3S)-1-methylpyrrolidin-3-yl) p-fluorobenzenecarbothioate oxylate as a white solid (0.289 g, 64%).

*Spectroscopic Data:* MP<sub>(isopropanol)</sub>: 130-134°C; IR(ATR): 3036, 2961, 2713, 2591, 1717, 1698, 1598, 913 cm<sup>-1</sup>; <sup>1</sup>H NMR (400 MHz, DMSO-*d*<sub>6</sub>) δ 8.00-7.96 (m, 2H), 7.44-7.38 (m, 2H), 4.52 (br s, 2H, overlapping with H<sub>2</sub>O in DMSO), 4.27-4.20 (m, 1H), 3.72 (dd, J = 11.8, 8.1 Hz, 1H), 3.37-3.31 (m, 1H), 3.28-3.22 (m, 2H), 2.78 (s, 3H), 2.59-2.52 (m, 1H), 2.07-1.98 (m, 1H); <sup>13</sup>C NMR (100.7 MHz, DMSO-*d*<sub>6</sub>) δ 189.4 (0), 166.8 (d, <sup>1</sup>J<sub>C,F</sub> = 252.7 Hz, 0), 164.3 (1), 132.5 (d, <sup>4</sup>J<sub>C,F</sub> = 2.8 Hz, 0), 129.9 (d, <sup>3</sup>J<sub>C,F</sub> = 9.6 Hz, 1), 116.4 (d, <sup>2</sup>J<sub>C,F</sub> = 22.4 Hz, 1), 59.7 (2), 54.1 (2), 40.4 (3), 38.6 (1), 30.0(2); <sup>19</sup>F NMR (376.6 MHz, DMSO-*d*<sub>6</sub>) δ -104.1; HRMS (ESI<sup>+</sup>): calculated for C<sub>12</sub>H<sub>15</sub>FNOS<sup>+</sup>: 240.0853; found for C<sub>12</sub>H<sub>15</sub>FNOS<sup>+</sup>: 240.0853; HPLC purity at 254nm (75% CH<sub>3</sub>CN : 10% CH<sub>3</sub>OH : 15% aqueous triethylamine [0.1% triethylamine in H<sub>2</sub>O], retention time 4.817 mins): 98.2 %.

(25) ((3*S*)-1-Methylpyrrolidin-3-yl) *p*-Fluorobenzenecarbothioate Oxylate IR(ATR)

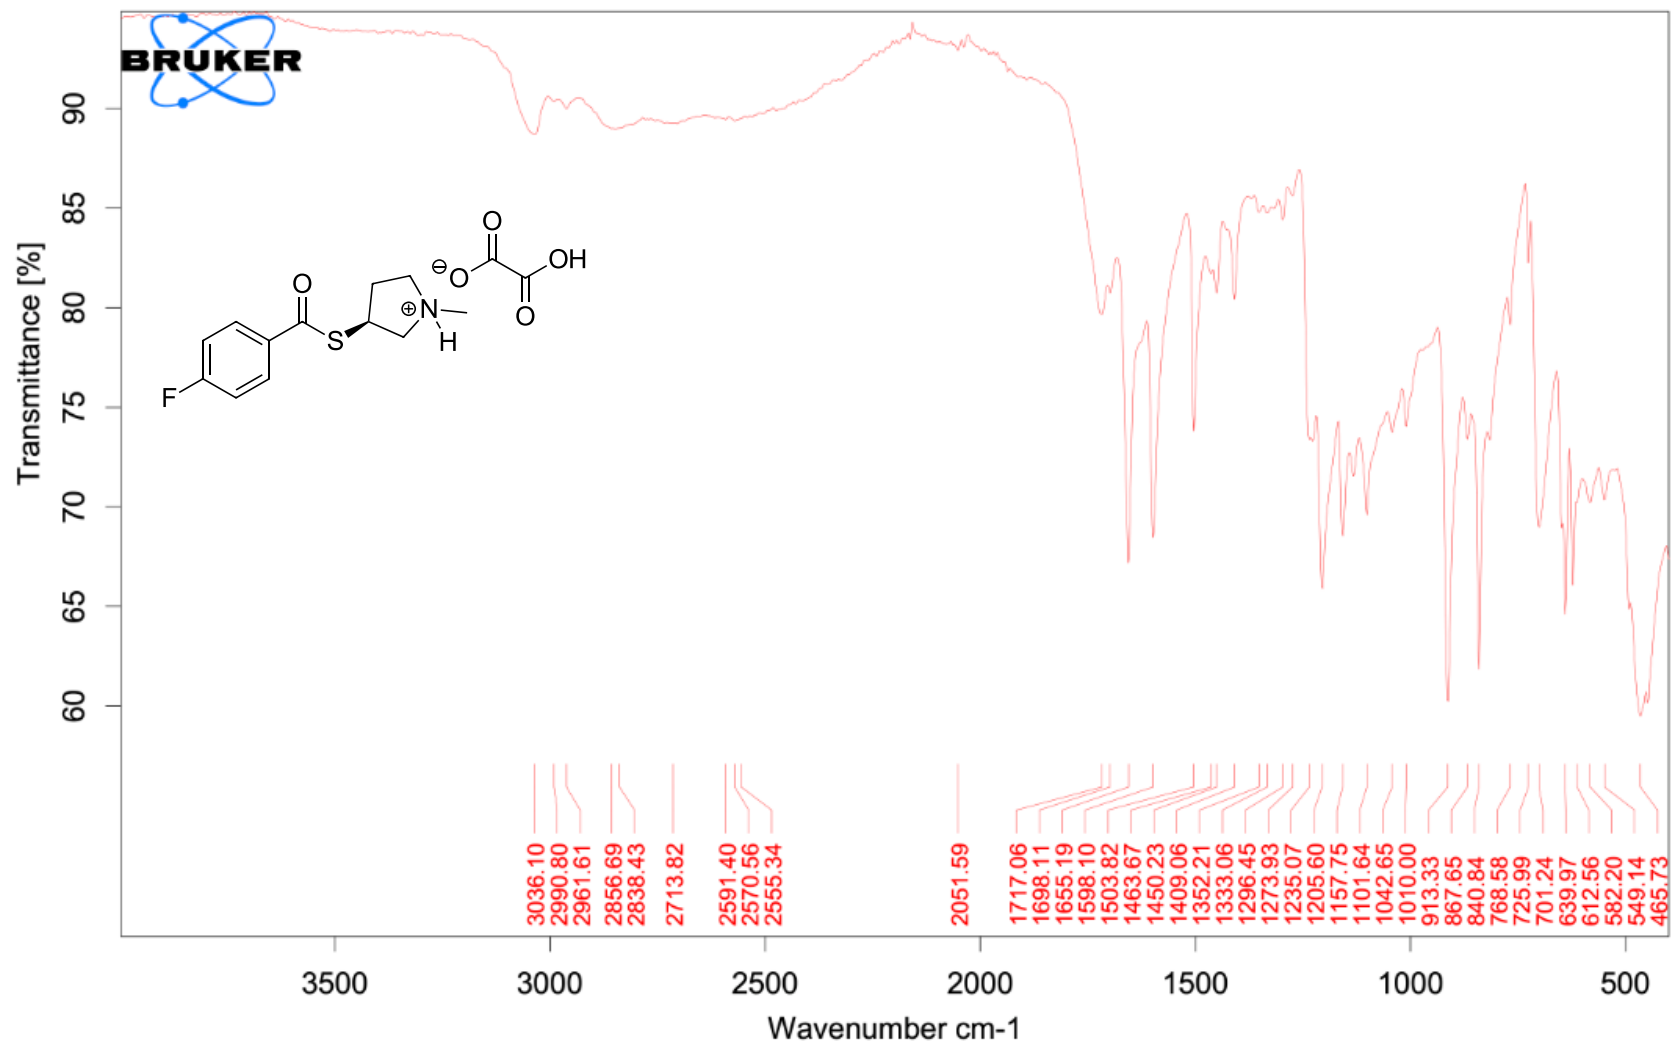

(25) ((3*S*)-1-Methylpyrrolidin-3-yl) *p*-Fluorobenzenecarbothioate Oxylate <sup>1</sup>H NMR 400 MHz (DMSO-*d*<sub>6</sub>)

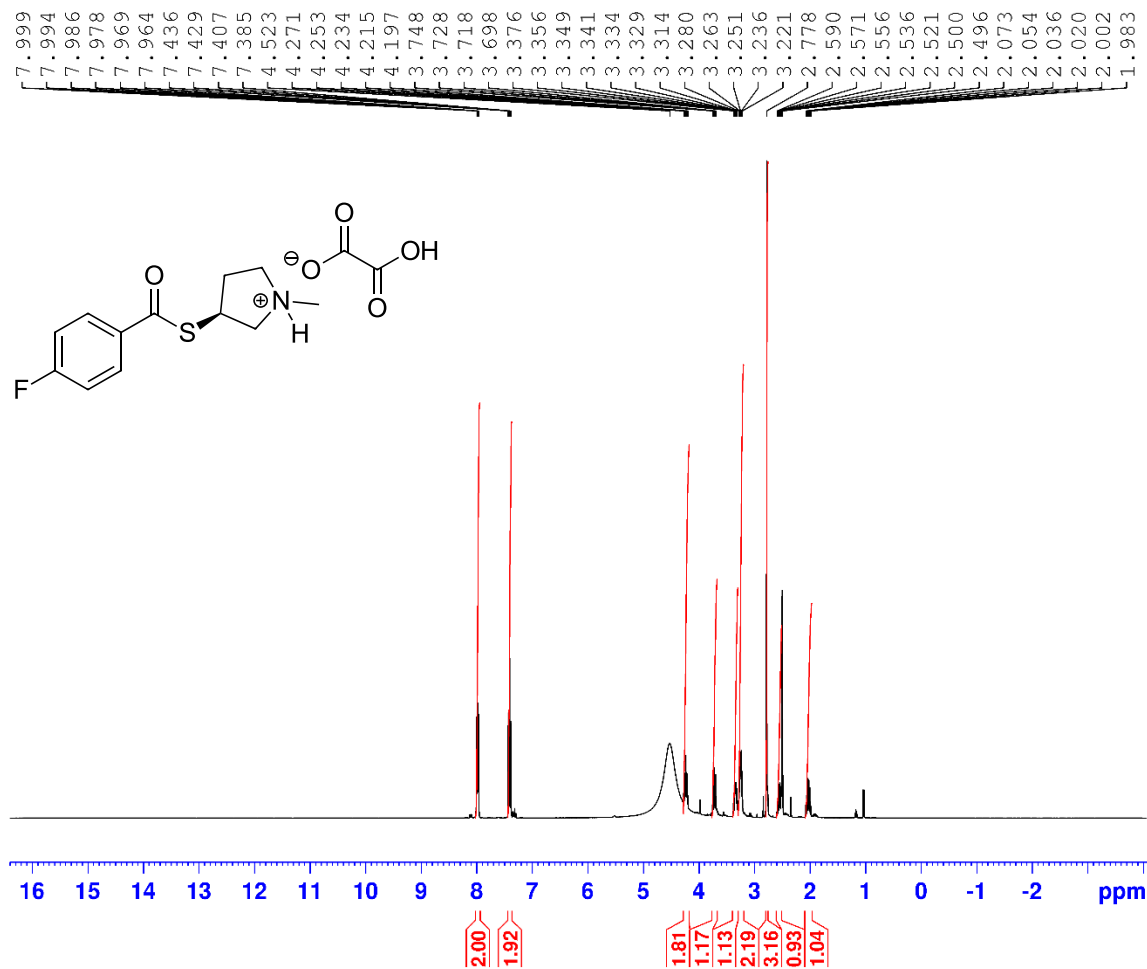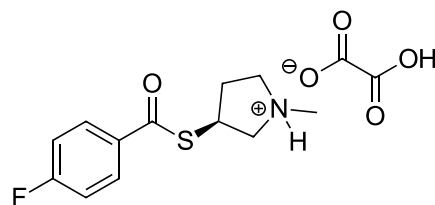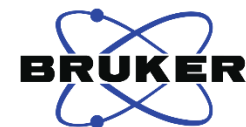

Current Data Parameters  
NAME MD-2-100 DMSO  
EXPNO 1  
PROCNO 1

F2 - Acquisition Parameters  
Date\_ 20221020  
Time 15.57 h  
INSTRUM AVN 400  
PROBHD Z163739\_0038 (  
PULPROG zg30  
ID 65536  
SOLVENT DMSO  
NS 16  
DS 2  
SWH 8196.722 Hz  
FIDRES 0.250144 Hz  
AQ 3.9976959 sec  
RG 101  
DW 61.000 usec  
DE 13.55 usec  
TE 298.0 K  
D1 1.00000000 sec  
TD0 1  
SFO1 400.3024719 MHz  
NUC1 1H  
PC 3.33 usec  
P1 9.98 usec  
PLW1 14.13000011 W

F2 - Processing parameters  
SI 65536  
SF 400.3000028 MHz  
WDW EM  
SSB 0  
LB 0.30 Hz  
GB 0  
PC 1.00

(25) ((3*S*)-1-Methylpyrrolidin-3-yl) *p*-Fluorobenzenecarbothioate Oxylate <sup>13</sup>C NMR 100 MHz (DMSO-*d*<sub>6</sub>)

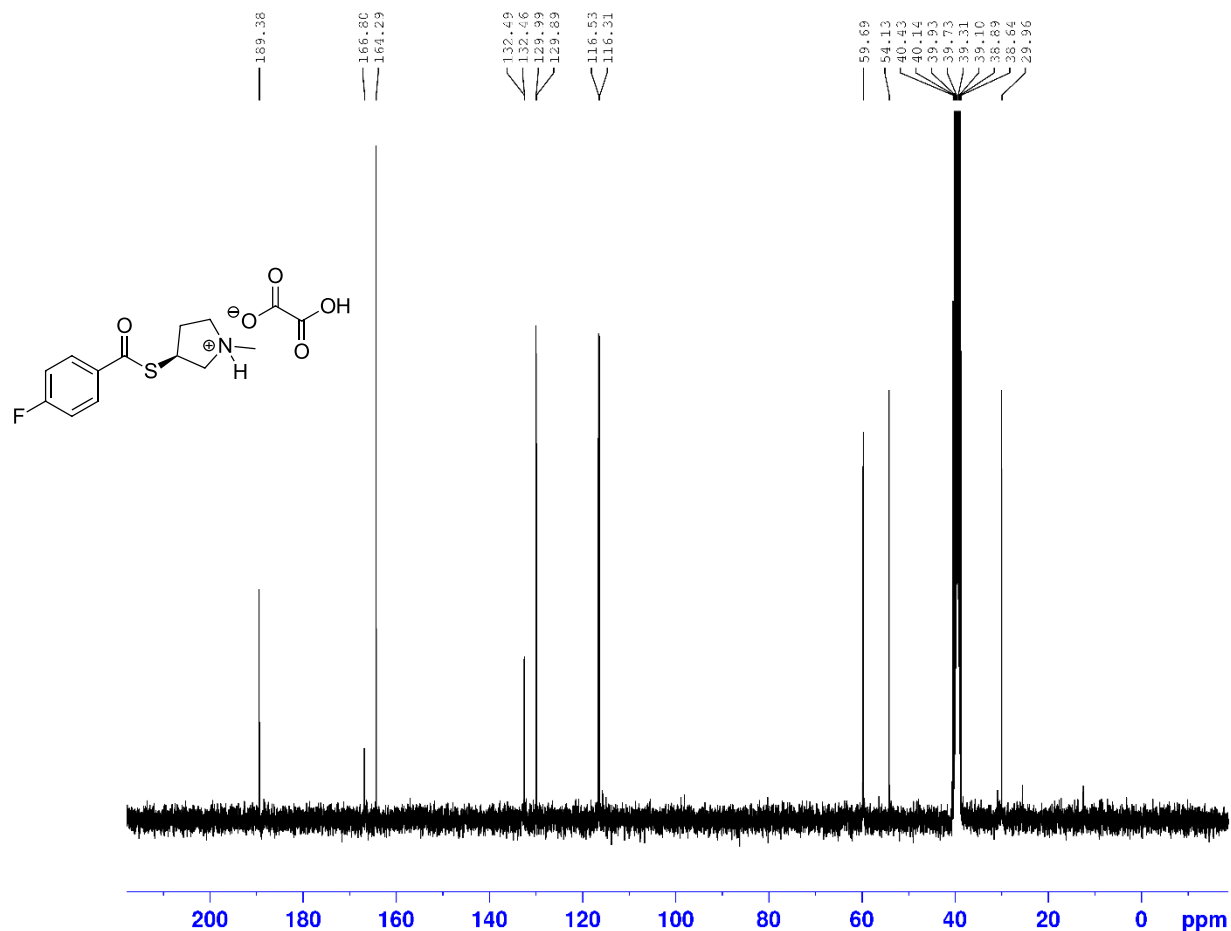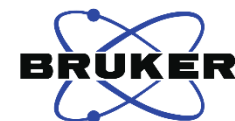

Current Data Parameters  
NAME MD-2-100 DMSO  
EXPNO 2  
PROCNO 1

F2 - Acquisition Parameters  
Date\_ 20221021  
Time 8.01 h  
INSTRUM AVN 400  
PROBHD z163739 0038 ( )  
PULPROG zgpg30  
TD 65536  
SOLVENT DMSO  
NS 2048  
DS 4  
SWH 23809.523 Hz  
FIDRES 0.726609 Hz  
AQ 1.3762560 sec  
RG 20.0452  
DW 21.000 usec  
DE 6.50 usec  
TE 298.0 K  
D1 3.0000000 sec  
D11 0.0300000 sec  
TD0 1  
SFO1 100.6655806 MHz  
NUC1 13C  
P0 3.33 usec  
P1 10.00 usec  
PLW1 58.86999893 W  
SFO2 400.3016012 MHz  
NUC2 1H  
CPDPRG[2] waltz65  
PCPD2 90.00 usec  
PLW2 14.13000011 W  
PLW12 0.17375000 W  
PLW13 0.08739400 W

F2 - Processing parameters  
SI 32768  
SF 100.6553602 MHz  
WDW EM  
SSB C  
LB 1.00 Hz  
GB C  
PC 1.40

(25) ((3*S*)-1-Methylpyrrolidin-3-yl) *p*-Fluorobenzenecarbothioate Oxylate High Resolution Mass Spectrum (ESI, positive mode)

### Mass Spectrum SmartFormula Report

**Analysis Info**

Analysis Name D:\Data\Xiao\Nov 01 2022\000002.d  
Method Xiao all 1.m  
Sample Name TRV 6026  
Comment

Acquisition Date 2022-11-01 2:43:55 PM  
Operator x  
Instrument compact 8255754.20059

**Acquisition Parameter**

|             |            |                      |          |                  |           |
|-------------|------------|----------------------|----------|------------------|-----------|
| Source Type | ESI        | Ion Polarity         | Positive | Set Nebulizer    | 0.5 Bar   |
| Focus       | Not active | Set Capillary        | 3500 V   | Set Dry Heater   | 180 °C    |
| Scan Begin  | 50 m/z     | Set End Plate Offset | -500 V   | Set Dry Gas      | 4.0 l/min |
| Scan End    | 1500 m/z   | Set Charging Voltage | 2000 V   | Set Divert Valve | Source    |
|             |            | Set Corona           | 0 nA     | Set APCI Heater  | 0 °C      |

| Meas. m/z | Ion Formula | m/z      | err [ppm] |
|-----------|-------------|----------|-----------|
| 240.0853  | C12H15FNOS  | 240.0853 | 0.2       |

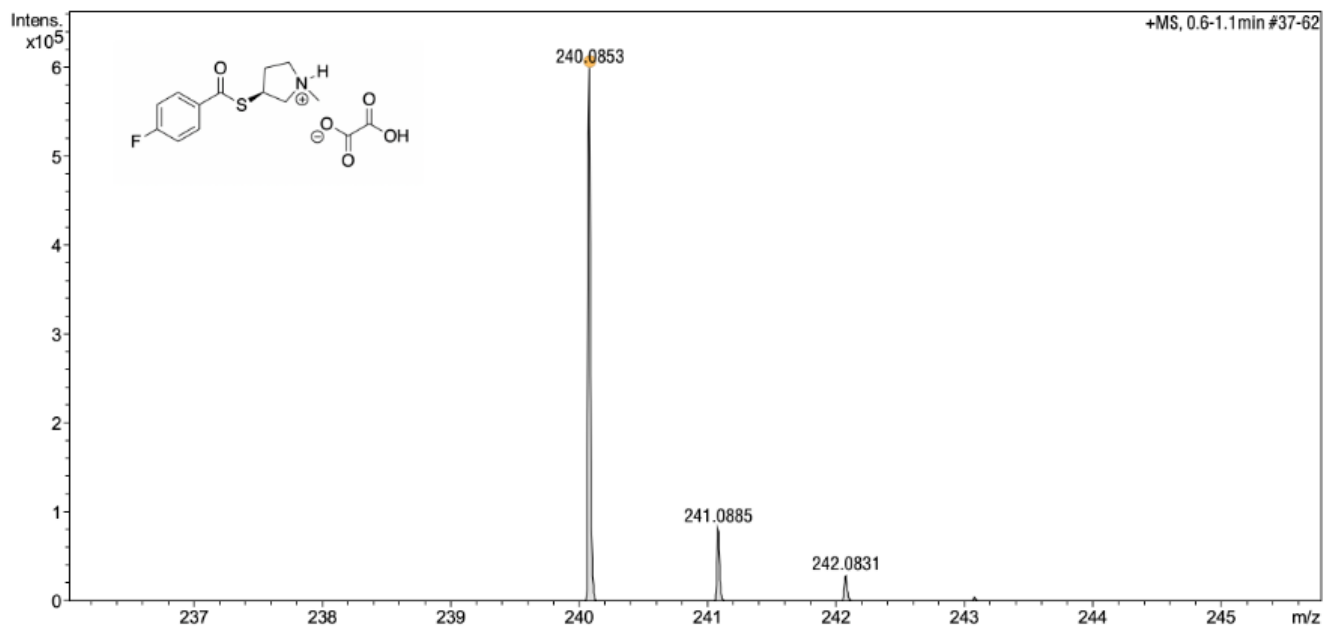

(25) ((3*S*)-1-Methylpyrrolidin-3-yl) *p*-Fluorobenzenecarbothioate Oxylate HPLC

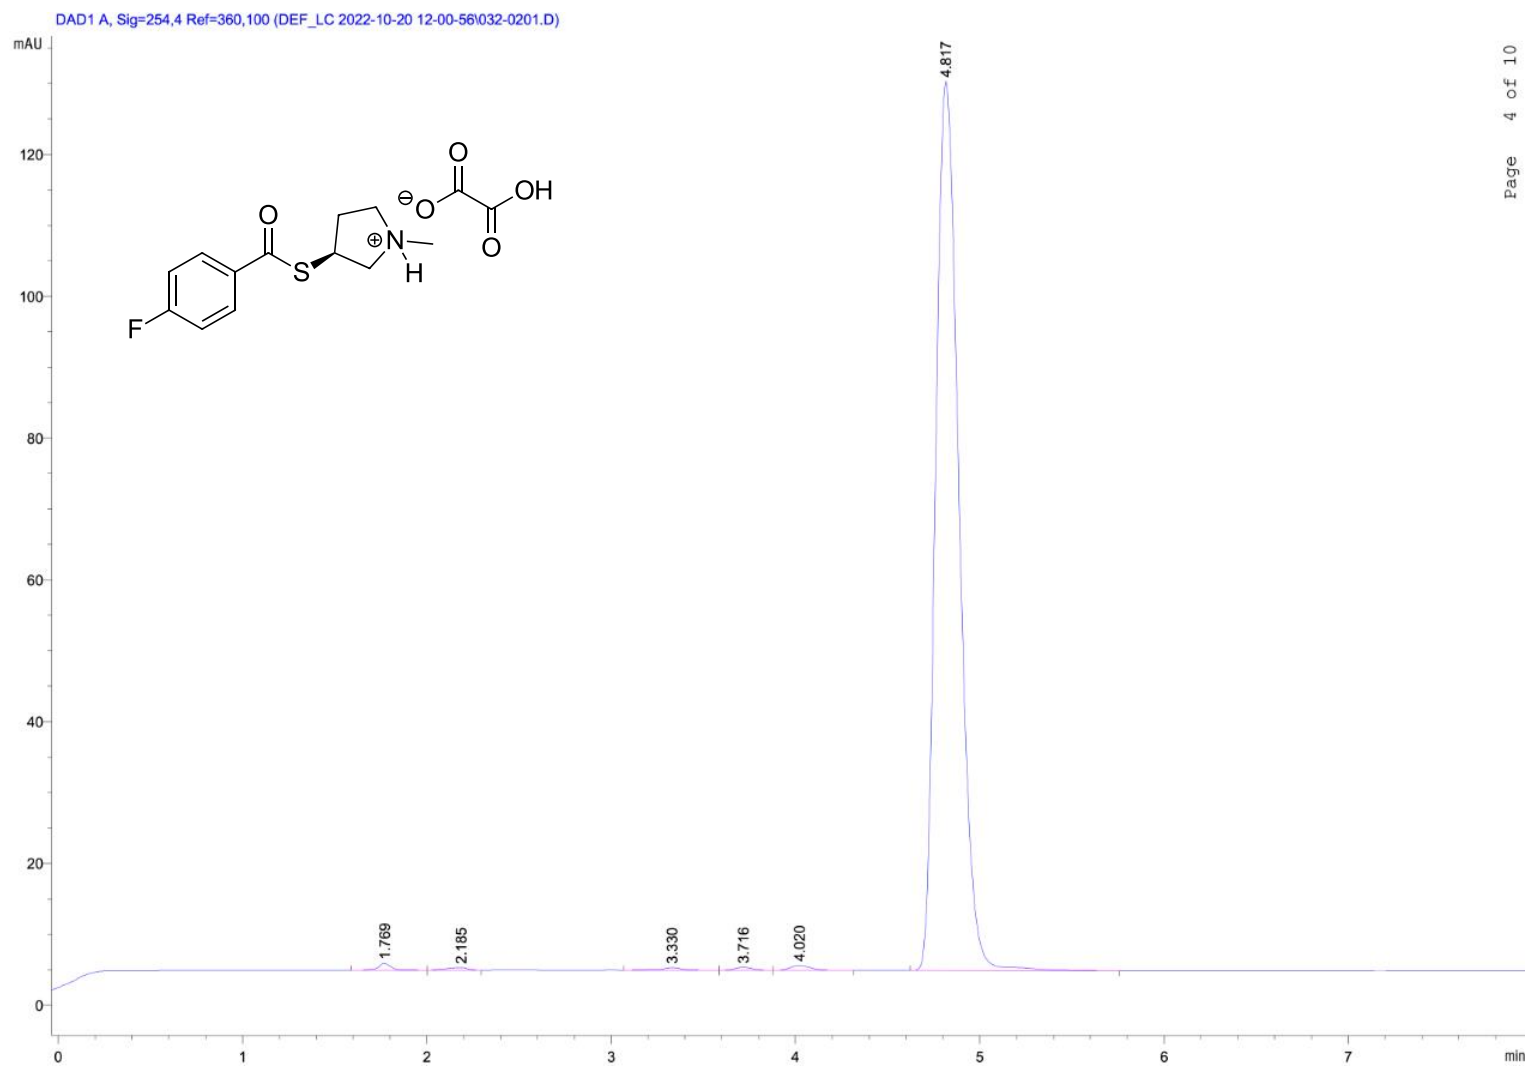

**(26) (3S)-3-(*p*-Fluorobenzoyloxy)-1-methyl-1-pyrrolidinium Chloride**

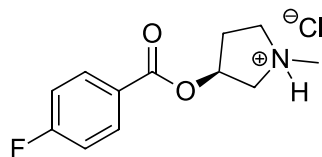

**Synthesis: (3S)-1-Methyl-3-pyrrolidinyl *p*-fluorobenzoate:** (3S)-(+)-1-Methyl-3-pyrrolidinol (0.20 mL, 1.82 mmol) was dissolved in anhydrous dichloromethane (6.00 mL) under an argon atmosphere and cooled to 0°C. To this solution, triethylamine (0.501 mL, 3.64 mmol) and 4-fluorobenzoyl chloride (0.218 g, 1.82 mmol). The ice bath was removed after 5 min, and the reaction was stirred for 24 hrs. At this time water (20 mL) was added, layers were separated, and the aqueous layer was extracted with dichloromethane (3 × 15 mL). The combined organic layers were dried over Na<sub>2</sub>SO<sub>3</sub>, gravity filtered, and the filtrate was concentrated *in vacuo* to produce an orange oil. This crude material was purified by flash chromatography through silica gel (5% MeOH/DCM/1% TEA) to afford (3S)-1-methyl-3-pyrrolidinyl *p*-fluorobenzoate as an orange oil (0.338 g, 83%).

**Spectroscopic data:** IR(ATR): 2965, 2942, 2777, 1712, 1603, 1507, 1268, 1113, 688 cm<sup>-1</sup>; <sup>1</sup>H NMR (400 MHz, DMSO-*d*<sub>6</sub>) δ 8.03-7.99 (m, 2H), 7.37-7.33 (m, 2H), 5.31-5.27 (m, 1H), 2.75-2.69 (m, 3H), 2.33-2.25 (m, 2H), 2.26 (s, 3H), 1.90-1.81 (m, 1H); <sup>13</sup>C NMR (100.7 MHz, DMSO-*d*<sub>6</sub>) δ 165.1 (d, <sup>1</sup>J<sub>C,F</sub> = 251.3 Hz, 0), 164.7 (0), 132.1 (d, <sup>3</sup>J<sub>C,F</sub> = 9.7 Hz, 1), 126.4 (d, <sup>4</sup>J<sub>C,F</sub> = 2.7 Hz, 0), 115.9 (d, <sup>2</sup>J<sub>C,F</sub> = 22.1 Hz, 1), 75.3 (1), 61.6 (2), 54.4 (2), 41.6 (3), 32.2 (2); HPLC purity at 254 nm (75% CH<sub>3</sub>CN : 10% CH<sub>3</sub>OH : 15% aqueous triethylamine [0.1% triethylamine in H<sub>2</sub>O], retention time 4.106 mins): 98.7 %.

**(3S)-3-(*p*-Fluorobenzoyloxy)-1-methyl-1-pyrrolidinium Chloride:** S-((3S)1-Methylpyrrolidin-3-yl) *p*-fluorobenzenecarbothioate (0.2484 g, 1.11 mmol) was dissolved in anhydrous diethyl ether (22mL) under an argon atmosphere. HCl in diethyl ether 1 N (1.7 mL, 1.67 mmol) was added dropwise and stirred for 3 hrs. The solvent was removed *in vacuo* resulting in a white solid. The compound was triturated three times with diethyl ether (20mL), solvent was removed with a pipet and compound was dried to produce (3S)-3-(*p*-fluorobenzoyloxy)-1-methyl-1-pyrrolidinium chloride (0.148 g, 51%) as a mixture of isomers.

*Spectroscopic data:* MP<sub>(diethyl ether)</sub>: 143-145 °C; IR(ATR): 3051, 2953, 2927, 2647, 2566, 2530, 1719, 1603, 1269, 1113, 766 cm<sup>-1</sup>; <sup>1</sup>H NMR (400 MHz, DMSO-*d*<sub>6</sub>) δ 11.17 (br s, 1H), 8.17-8.11 (m, 2H), 7.40-7.35 (m, 2H), 5.55-5.49 (m, 1H), 3.93-3.63 (m, 2H), 3.30-3.24 (m, 1H), 3.14-3.02 (m, 1H), 2.85 (s, 3H), 2.58-2.14 (m, 2H); <sup>13</sup>C NMR (100.7 MHz, DMSO-*d*<sub>6</sub>) δ 165.4 (d, <sup>1</sup>J<sub>C,F</sub> = 251.8 Hz, 0), 164.2 (0), 132.6 (1), 125.9 (0), 115.8 (d, <sup>2</sup>J<sub>C,F</sub> = 22.5 Hz, 1), 73.3 (1), 59.5 (2), 53.2 (2), 40.4 (3), 30.3 (2); HRMS (ESI<sup>+</sup>): calculated for C<sub>12</sub>H<sub>15</sub>FNO<sub>2</sub><sup>+</sup>: 224.1081 amu; found for C<sub>12</sub>H<sub>15</sub>FNO<sub>2</sub><sup>+</sup>: 224.1083 amu; HPLC purity at 254nm (75% CH<sub>3</sub>CN : 10% CH<sub>3</sub>OH : 15% aqueous triethylamine [0.1% triethylamine in H<sub>2</sub>O], retention time 4.118 mins): 98.8 %.



(26) (3S)-3-(*p*-Fluorobenzoyloxy)-1-methyl-1-pyrrolidinium Chloride IR(ATR)

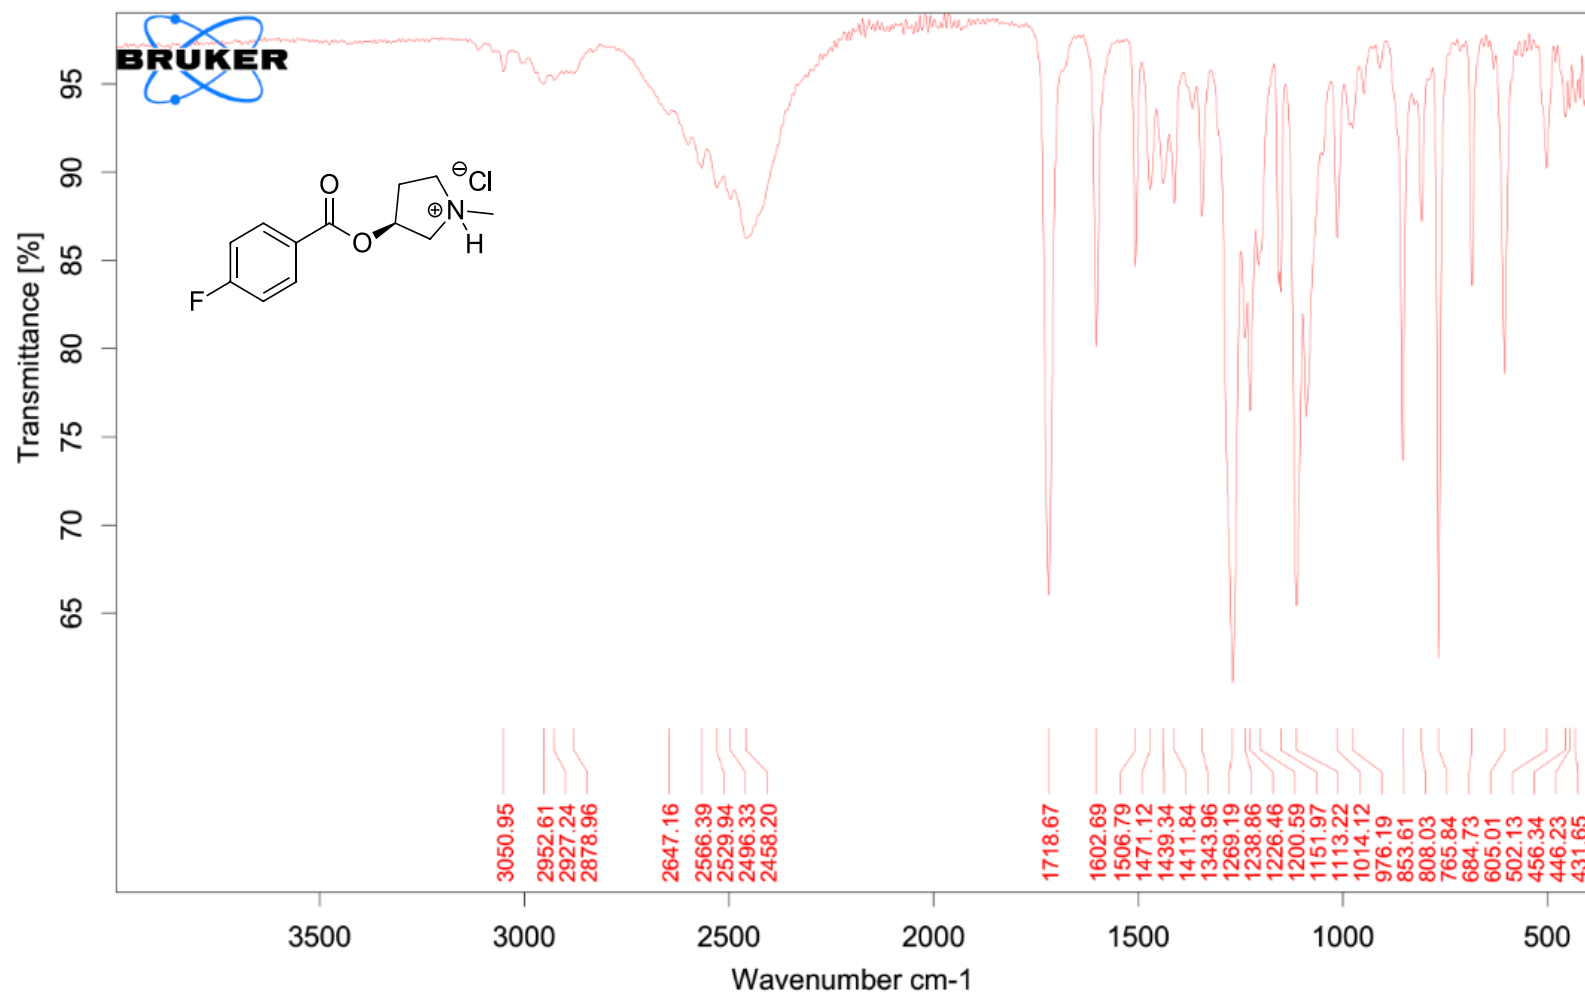

(26) (3*S*)-3-(*p*-Fluorobenzoyloxy)-1-methyl-1-pyrrolidinium Chloride <sup>1</sup>HNMR 400 MHz (DMSO-*d*<sub>6</sub>)

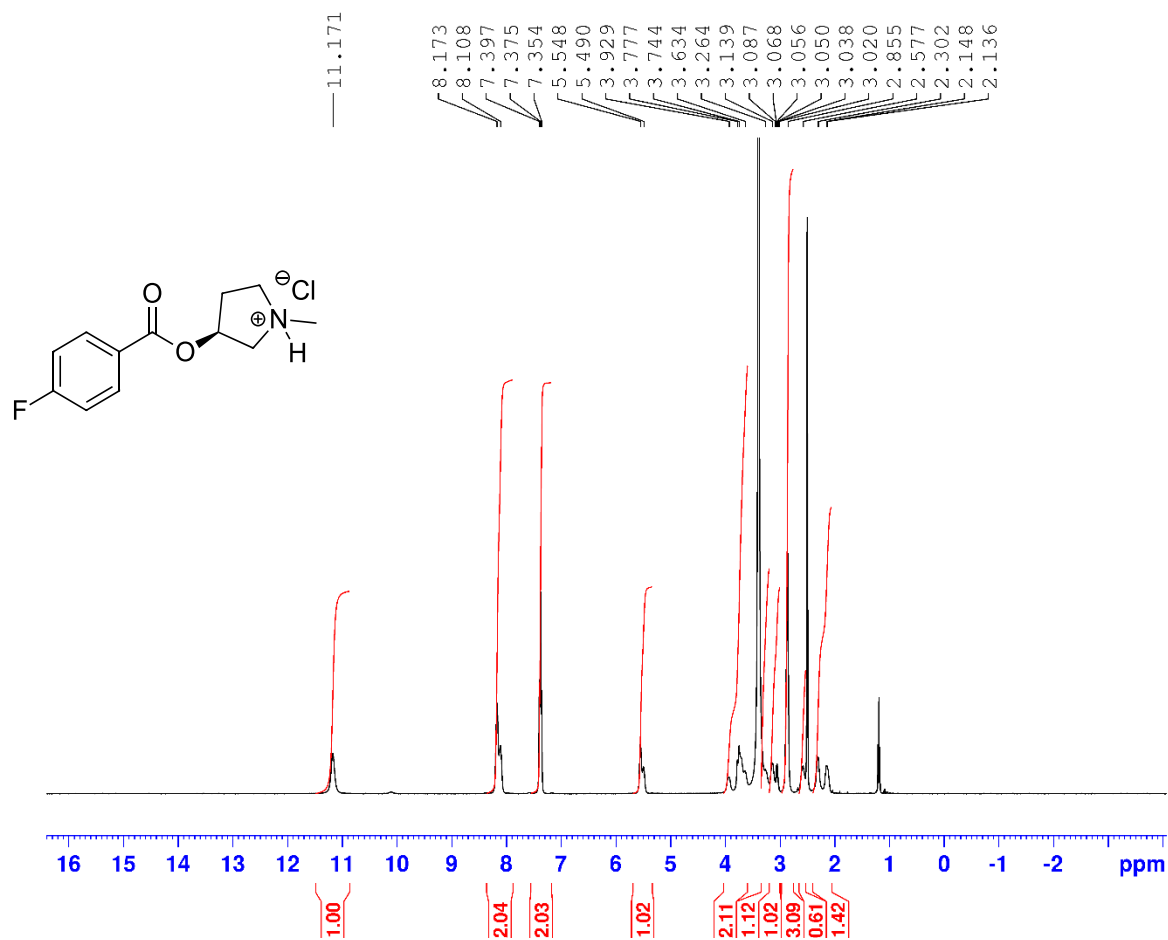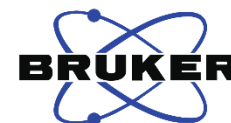

Current Data Parameters  
 NAME MD-2-153 DMSO  
 EXPNO 1  
 PROCNO 1

F2 - Acquisition Parameters  
 Date\_ 20221125  
 Time\_ 15.37 h  
 INSTRUM AVN 400  
 PROBHD Z163739\_0038 ( (   
 PULPROG zg30  
 TD 65536  
 SOLVENT DMSO  
 NS 16  
 DS 2  
 SWH 8196.722 Hz  
 FIDRES 0.250144 Hz  
 AQ 3.9976959 sec  
 RG 101  
 DW 61.000 usec  
 DE 13.55 usec  
 TE 294.4 K  
 D1 1.00000000 sec  
 TD0 1  
 SFO1 400.3024719 MHz  
 NUC1 1H  
 P0 3.33 usec  
 P1 9.98 usec  
 PLW1 14.1300011 W

F2 - Processing parameters  
 SI 65536  
 SF 400.300023 MHz  
 WDW EM  
 SSB 0  
 LB 0.30 Hz  
 GB 0  
 PC 1.00

(26) (3*S*)-3-(*p*-Fluorobenzoyloxy)-1-methyl-1-pyrrolidinium Chloride <sup>13</sup>CNMR 100 MHz (DMSO-*d*<sub>6</sub>)

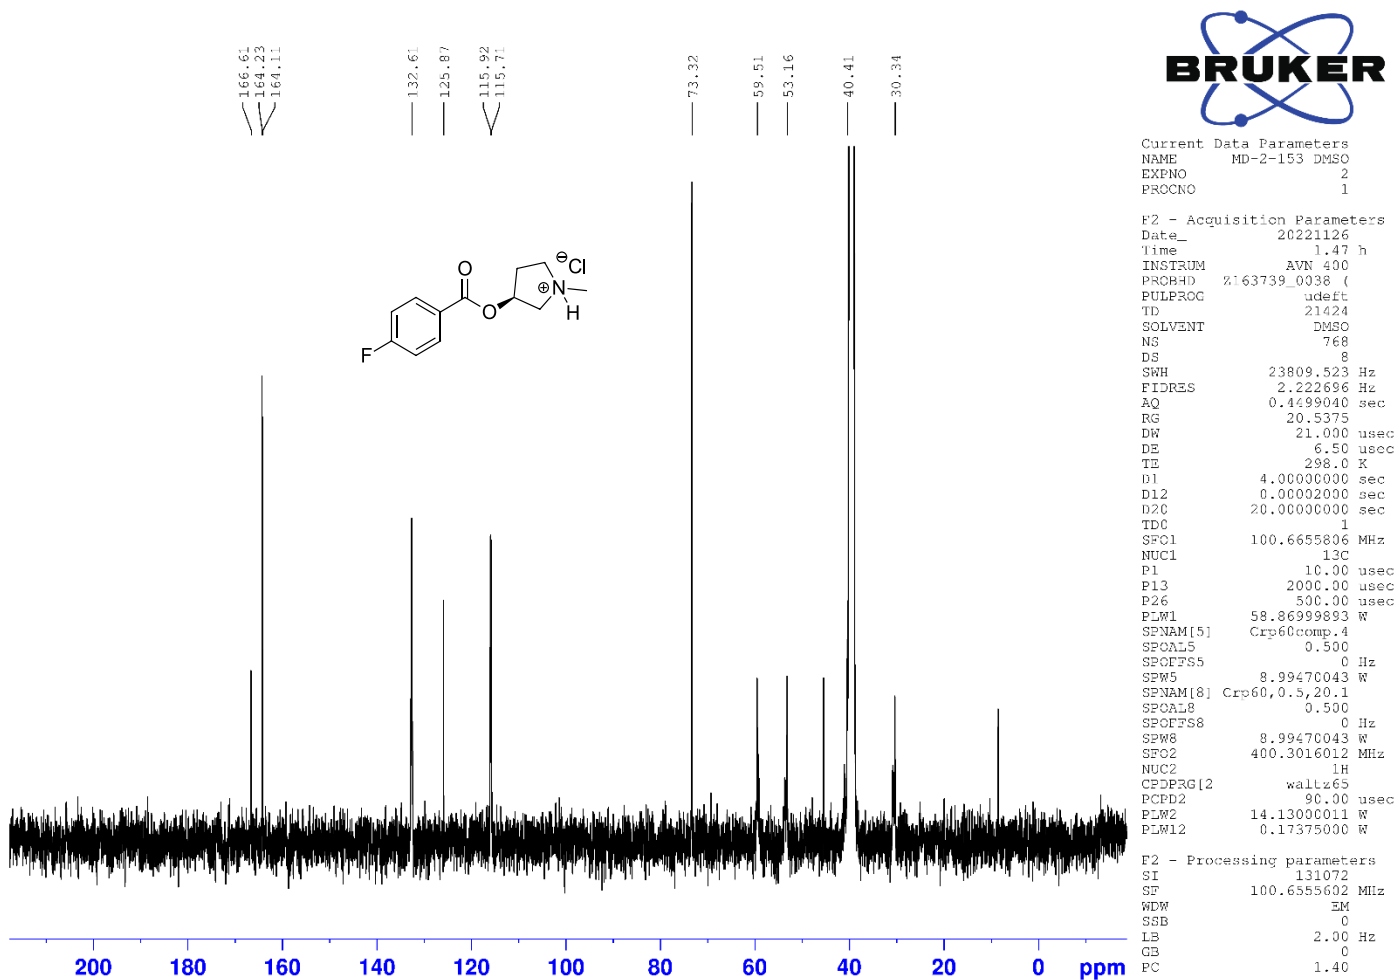

(26) (3S)-3-(*p*-Fluorobenzoyloxy)-1-methyl-1-pyrrolidinium Chloride High Resolution Mass Spectrum (ESI, positive mode)

### Mass Spectrum SmartFormula Report

**Analysis Info**

Analysis Name D:\Data\Xiao\Dec 13 2022\000004.d  
Method Xiao all 1.m  
Sample Name TRV6027 HCl  
Comment

Acquisition Date 2022-12-13 2:18:41 PM  
Operator x  
Instrument compact 8255754.20059

**Acquisition Parameter**

|             |            |                      |          |                  |           |
|-------------|------------|----------------------|----------|------------------|-----------|
| Source Type | ESI        | Ion Polarity         | Positive | Set Nebulizer    | 0.5 Bar   |
| Focus       | Not active | Set Capillary        | 3500 V   | Set Dry Heater   | 180 °C    |
| Scan Begin  | 50 m/z     | Set End Plate Offset | -500 V   | Set Dry Gas      | 4.0 l/min |
| Scan End    | 1500 m/z   | Set Charging Voltage | 2000 V   | Set Divert Valve | Source    |
|             |            | Set Corona           | 0 nA     | Set APCI Heater  | 0 °C      |

| Meas. m/z | Ion Formula | m/z      | err [ppm] |
|-----------|-------------|----------|-----------|
| 224.1083  | C12H15FNO2  | 224.1081 | -0.6      |

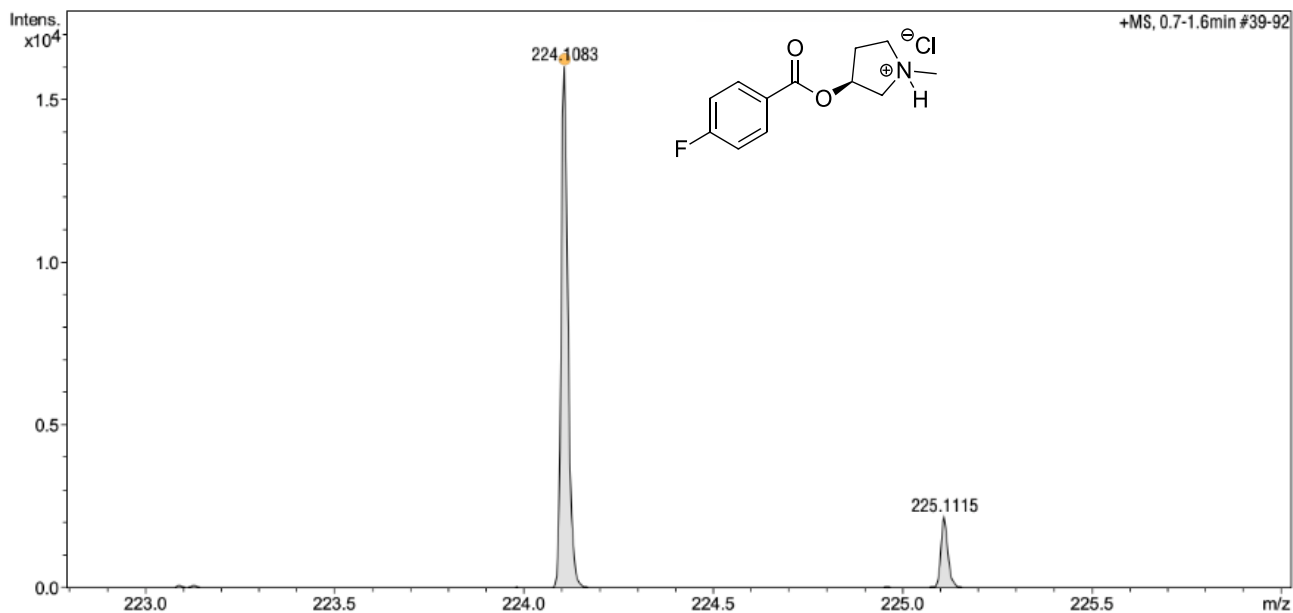

(26) (3*S*)-3-(*p*-Fluorobenzoyloxy)-1-methyl-1-pyrrolidinium Chloride HPLC. Note: Noise from the injection has a retention time from 1.6 min until 2.5 min. The compound of interest has a retention time of 4.118 min.

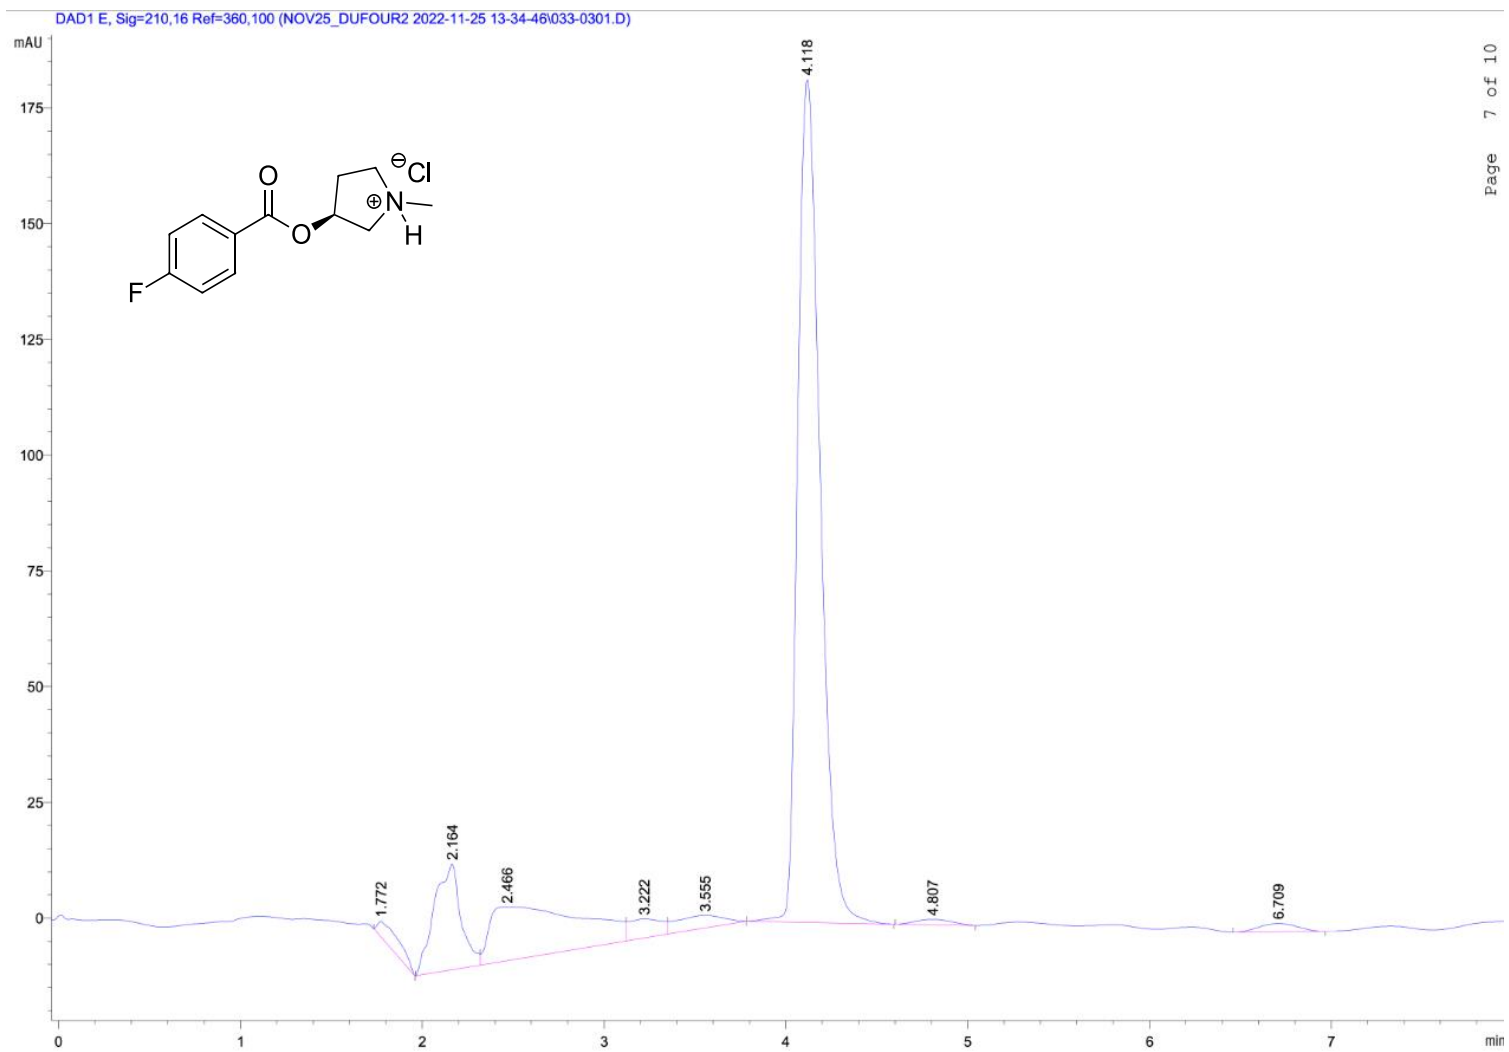

(27) ((3*R*)-1-Methylpyrrolidin-3-yl) *p*-Iodobenzenecarbothioate Oxylate

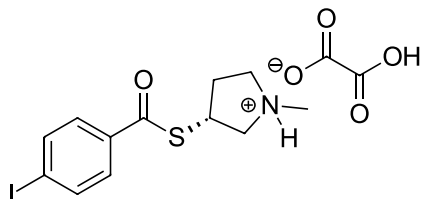

Synthesis: **(3*S*)-3-(Mesyloxy)-1-methylpyrrolidine**: (*S*)-(-)-1-Methyl-3-pyrrolidinol (6.00 mL, 54.6 mmol) was dissolved in anhydrous DCM (130 mL) and cooled to 0°C with an ice bath. Triethylamine (11.4 mL, 81.9 mmol) and methanesulfonyl chloride (4.90 mL, 62.8 mmol) were added dropwise at 0°C. The ice bath was removed after 5 mins, and the reaction was stirred overnight. Brine (50 mL) was added to the reaction and the layers were separated. The aqueous layer was extracted with dichloromethane (3 × 15 mL). The combined organic layers were dried over Na<sub>2</sub>SO<sub>3</sub>. Gravity filtered, and the filtrate was concentrated *in vacuo* to produce a yellow oil (8.87 g, 91%). Product confirmed by <sup>1</sup>H NMR and the crude material was immediately carried through to next step without further purification.

**(3*R*)-*S*-(1-Methylpyrrolidin-3-yl) ethanethioate**: (3*S*)-3-(Mesyloxy)-1-methylpyrrolidine (6.99 g, 39.0 mmol), was dissolved in anhydrous THF (130 mL) under an argon atmosphere. 18-crown-6-ether (15.5 g, 58.5 mmol) was added followed by potassium thioacetate (6.68 g, 58.5 mmol), added in 3 portions. Once all potassium thioacetate had gone into solution, the reaction was heated to 30°C and left overnight. The reaction was filtered then diluted with water (50 mL) and extracted with EtOAc (3 × 15 mL). The organic layer was washed with water (3 × 20 mL) and brine (3 × 20 mL), dried over Na<sub>2</sub>SO<sub>3</sub> and concentrated *in vacuo* to produce a red oil. The crude material was then distilled under vacuum (1 mm Hg) at 100 °C to give a yellow oil (4.45 g, 72%). Product confirmed by <sup>1</sup>H NMR and the crude material was immediately carried through to next step without further purification.

**(*R*)-1-Methyl-3-pyrrolidinethiol**: (3*R*)-*S*-(1-Methylpyrrolidin-3-yl) ethanethioate (0.951 g, 5.97 mmol) was dissolved in MeOH (30 mL) and sodium methoxide (0.333 g, 5.97 mmol) was added to the stirring solution. After all starting material was consumed by TLC using a KMnO<sub>4</sub> stain, MeOH was removed *in vacuo* and a solvent swap with DCM was done and used in the next step immediately.

**((3R)-1-Methylpyrrolidin-3-yl) p-iodobenzenethioate:** (R)-1-Methyl-3-pyrrolidinethiol was dissolved in DCM (20mL) and cooled to 0 °C in an ice bath. 4-Iodobenzoyl chloride (1.59 g, 5.97 mmol) was added to the reaction flask followed by triethylamine (1.66 mL, 11.9 mmol). The ice bath was removed after 30 mins, reaction was warmed to room temperature and stirred for 16 hrs. Once the reaction was complete, the solvent was removed *in vacuo*. The crude material was washed with diethyl ether, filtered to remove all precipitate, and the filtrate was concentrated *in vacuo* to give an orange solid, (1.63 g, 79%). This material was used carried through immediately without further purification.

**((3R)-1-Methylpyrrolidin-3-yl) p-Iodobenzenecarbothioate Oxylate:** ((3R)-1-Methylpyrrolidin-3-yl) p-iodobenzenethioate (1.14 g, 3.28 mmol) was completely dissolved in isopropanol (63 mL). With stirring, oxalic acid (0.296 g, 3.28 mmol) was added and left to react for 3 hrs. The solution was concentrated *in vacuo* to give a white solid and immediately recrystallized with isopropanol. For further purification, this material was recrystallized with methanol twice to give ((3R)-1-methylpyrrolidin-3-yl) p-iodobenzenecarbothioate Oxylate as a white solid (0.610 g, 42%)

*Spectroscopic Data:* MP<sub>(isopropanol)</sub>: 197–200 °C; IR(ATR): 3042, 2838, 2705, 2574, 1658, 1561, 909, 706 cm<sup>-1</sup>; <sup>1</sup>H NMR (400 MHz, DMSO-*d*<sub>6</sub>) δ 7.98-7.96 (m, 2H), 7.67-7.65 (m, 2H), 4.26-4.19 (m, 1H), 4.06 (br s, 2H, overlapping with H<sub>2</sub>O in DMSO); 3.69 (dd, J = 11.7, 8.0 Hz, 1H), 3.35-3.29 (m, 1H), 3.24-3.18 (m, 2H), 2.76 (s, 3H), 2.59-2.52 (m, 1H), 2.06-1.97 (m, 1H); <sup>13</sup>C NMR (100.7 MHz, DMSO-*d*<sub>6</sub>) δ 190.3 (0), 164.2 (0), 138.2 (1), 135.1 (0), 128.5 (1), 103.0 (0), 59.8 (2), 54.2 (2), 40.5 (3), 38.6 (1), 30.0 (0); HRMS (ESI<sup>+</sup>): calculated for C<sub>12</sub>H<sub>15</sub>INOS<sup>+</sup>: 347.9913 amu; found for C<sub>12</sub>H<sub>15</sub>INOS<sup>+</sup>: 347.9910 amu; HPLC purity at 230nm (75% CH<sub>3</sub>CN : 10% CH<sub>3</sub>OH : 15% aqueous triethylamine [0.1% triethylamine in H<sub>2</sub>O], retention time 8.331 mins): 99.5 %.

(27) ((3*R*)-1-Methylpyrrolidin-3-yl) *p*-Iodobenzenecarbothioate Oxylate IR(ATR)

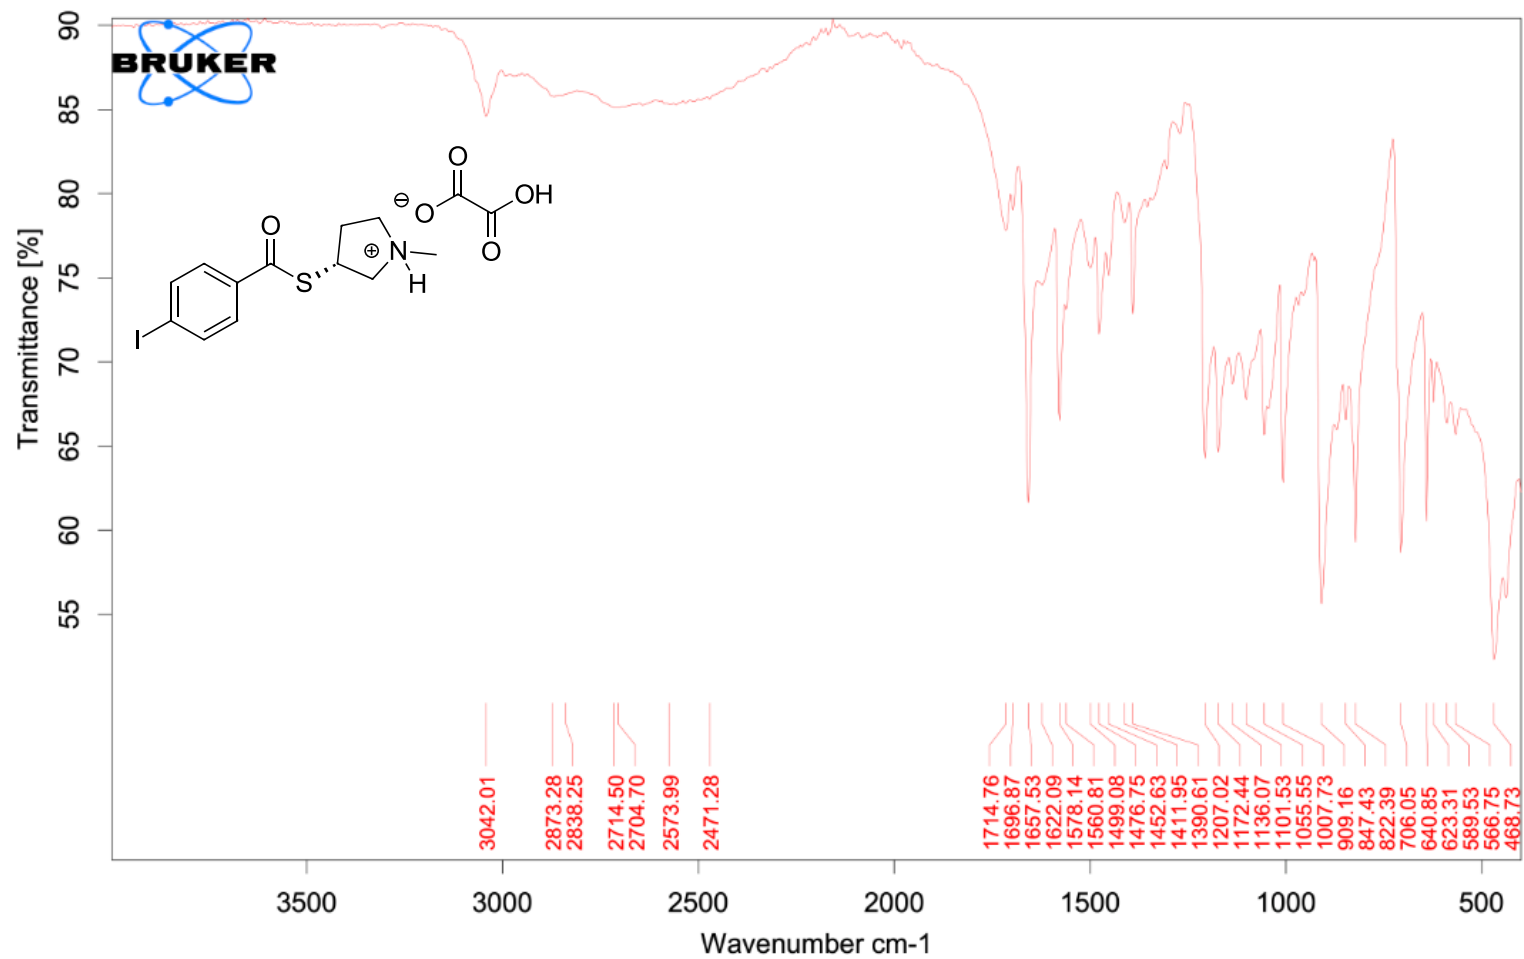



(27) ((3R)-1-Methylpyrrolidin-3-yl) *p*-Iodobenzenecarbothioate Oxylate <sup>1</sup>HNMR 400 MHz (DMSO-*d*<sub>6</sub>)

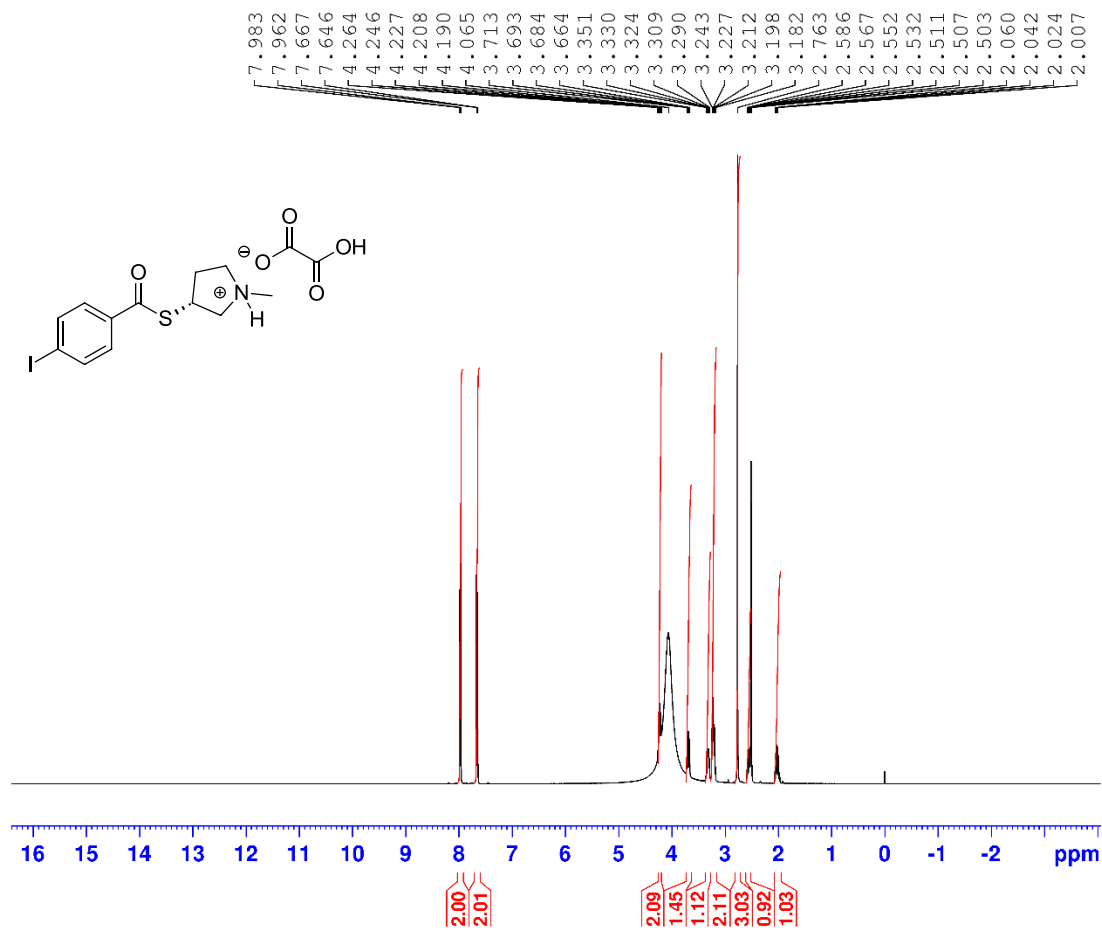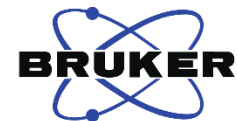

Current Data Parameters  
 NAME MD-2-162 DMSO  
 EXPNO 1  
 PROCNO 1

F2 - Acquisition Parameters  
 Date\_ 20221206  
 Time 16.12 h  
 INSTRUM AVN 400  
 PROBHD z163739\_0038 (z  
 PULPROG zg30  
 TD 65536  
 SOLVENT DMSO  
 NS 16  
 DS 2  
 SMH 8196.722 Hz  
 FIDRES 0.250144 Hz  
 AQ 3.9976959 sec  
 RG 101  
 DW 61.000 usec  
 DE 13.55 usec  
 TE 298.0 K  
 D1 1.0000000 sec  
 TD0 1  
 SF01 400.3024719 MHz  
 NUC1 1H  
 P0 3.33 usec  
 P1 9.98 usec  
 PLW1 14.1300011 w

F2 - Processing parameters  
 S1 65536  
 SF 400.3000000 MHz  
 WDW EM  
 SSB 0  
 LB 0.30 Hz  
 GB 0  
 PC 1.00

(27) ((3R)-1-Methylpyrrolidin-3-yl) *p*-Iodobenzenecarbothioate Oxylate <sup>13</sup>CNMR 100 MHz (DMSO-*d*<sub>6</sub>)

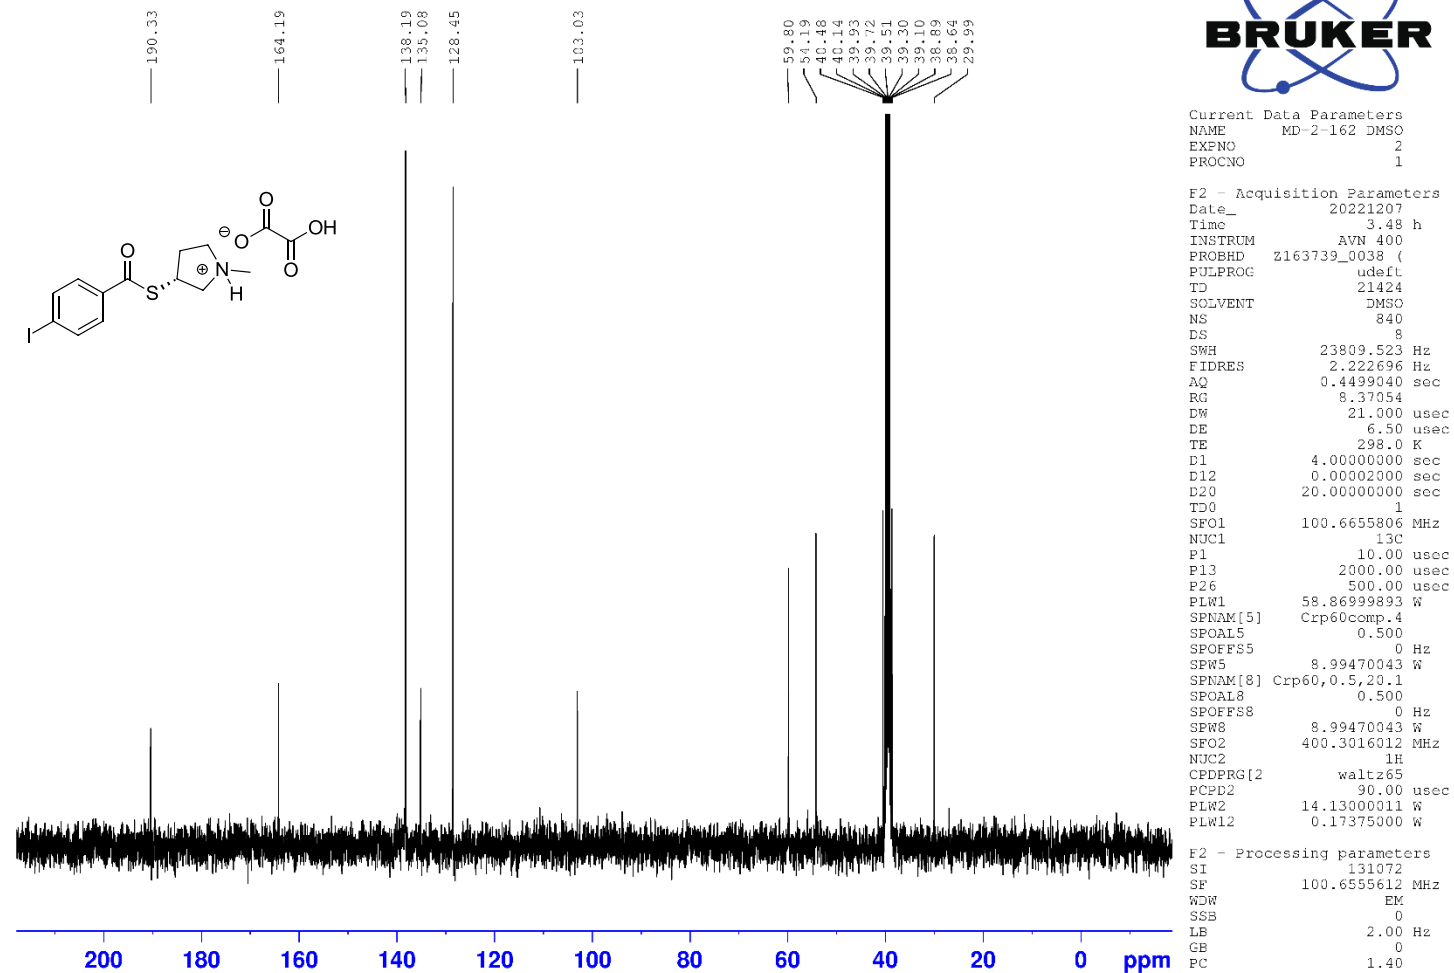

(27) ((3*R*)-1-Methylpyrrolidin-3-yl) *p*-Iodobenzenecarbothioate Oxylate High Resolution Mass Spectrum (ESI, positive mode)

### Mass Spectrum SmartFormula Report

**Analysis Info**

Analysis Name D:\Data\Xiao\Dec 13 2022\000002.d  
Method Xiao all 1.m  
Sample Name TRV6029 Oxalate  
Comment

Acquisition Date 2022-12-13 2:01:53 PM  
Operator x  
Instrument compact 8255754.20059

**Acquisition Parameter**

|             |            |                      |          |                  |           |
|-------------|------------|----------------------|----------|------------------|-----------|
| Source Type | ESI        | Ion Polarity         | Positive | Set Nebulizer    | 0.5 Bar   |
| Focus       | Not active | Set Capillary        | 3500 V   | Set Dry Heater   | 180 °C    |
| Scan Begin  | 50 m/z     | Set End Plate Offset | -500 V   | Set Dry Gas      | 4.0 l/min |
| Scan End    | 1500 m/z   | Set Charging Voltage | 2000 V   | Set Divert Valve | Source    |
|             |            | Set Corona           | 0 nA     | Set APCI Heater  | 0 °C      |

| Meas. m/z | Ion Formula                          | m/z      | err [ppm] |
|-----------|--------------------------------------|----------|-----------|
| 347.9910  | C <sub>12</sub> H <sub>15</sub> INOS | 347.9914 | 0.9       |

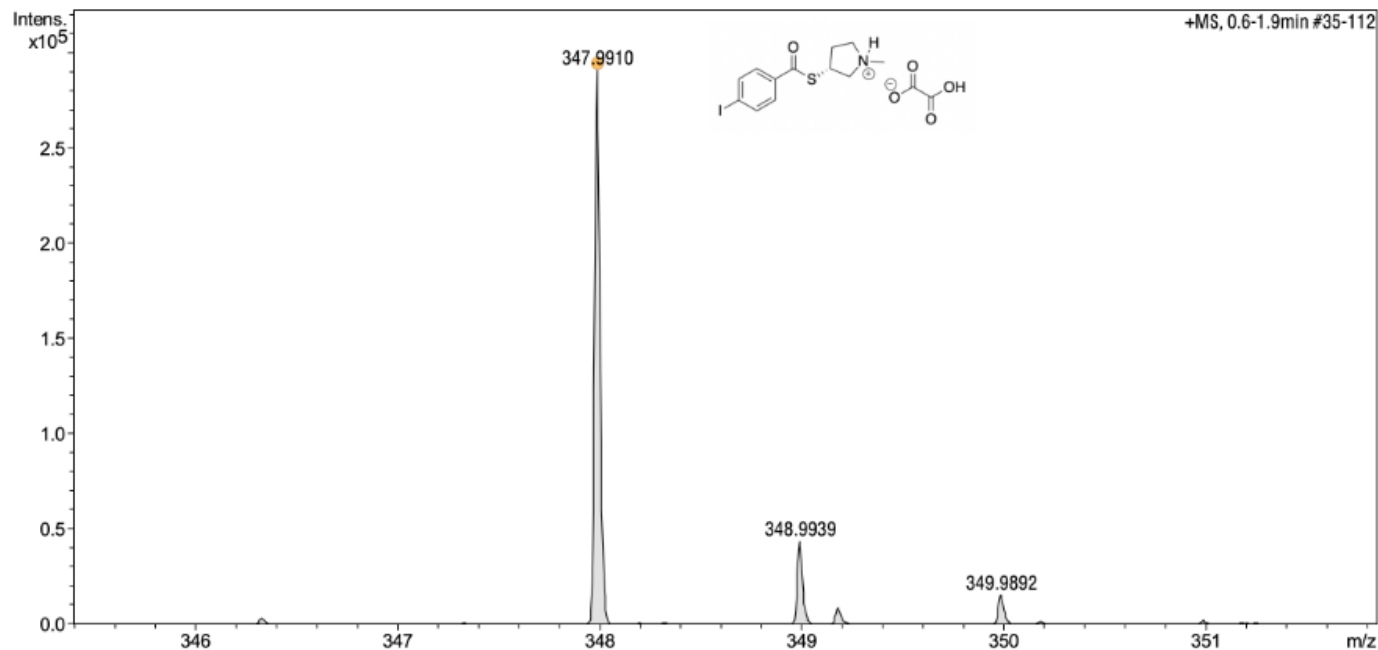

(27) ((3*R*)-1-Methylpyrrolidin-3-yl) *p*-Iodobenzenecarbothioate Oxylate HPLC. Note: Noise from the injection has a retention time from 1.6 min until 2.5 min. The compound of interest has a retention time of 8.331 min.

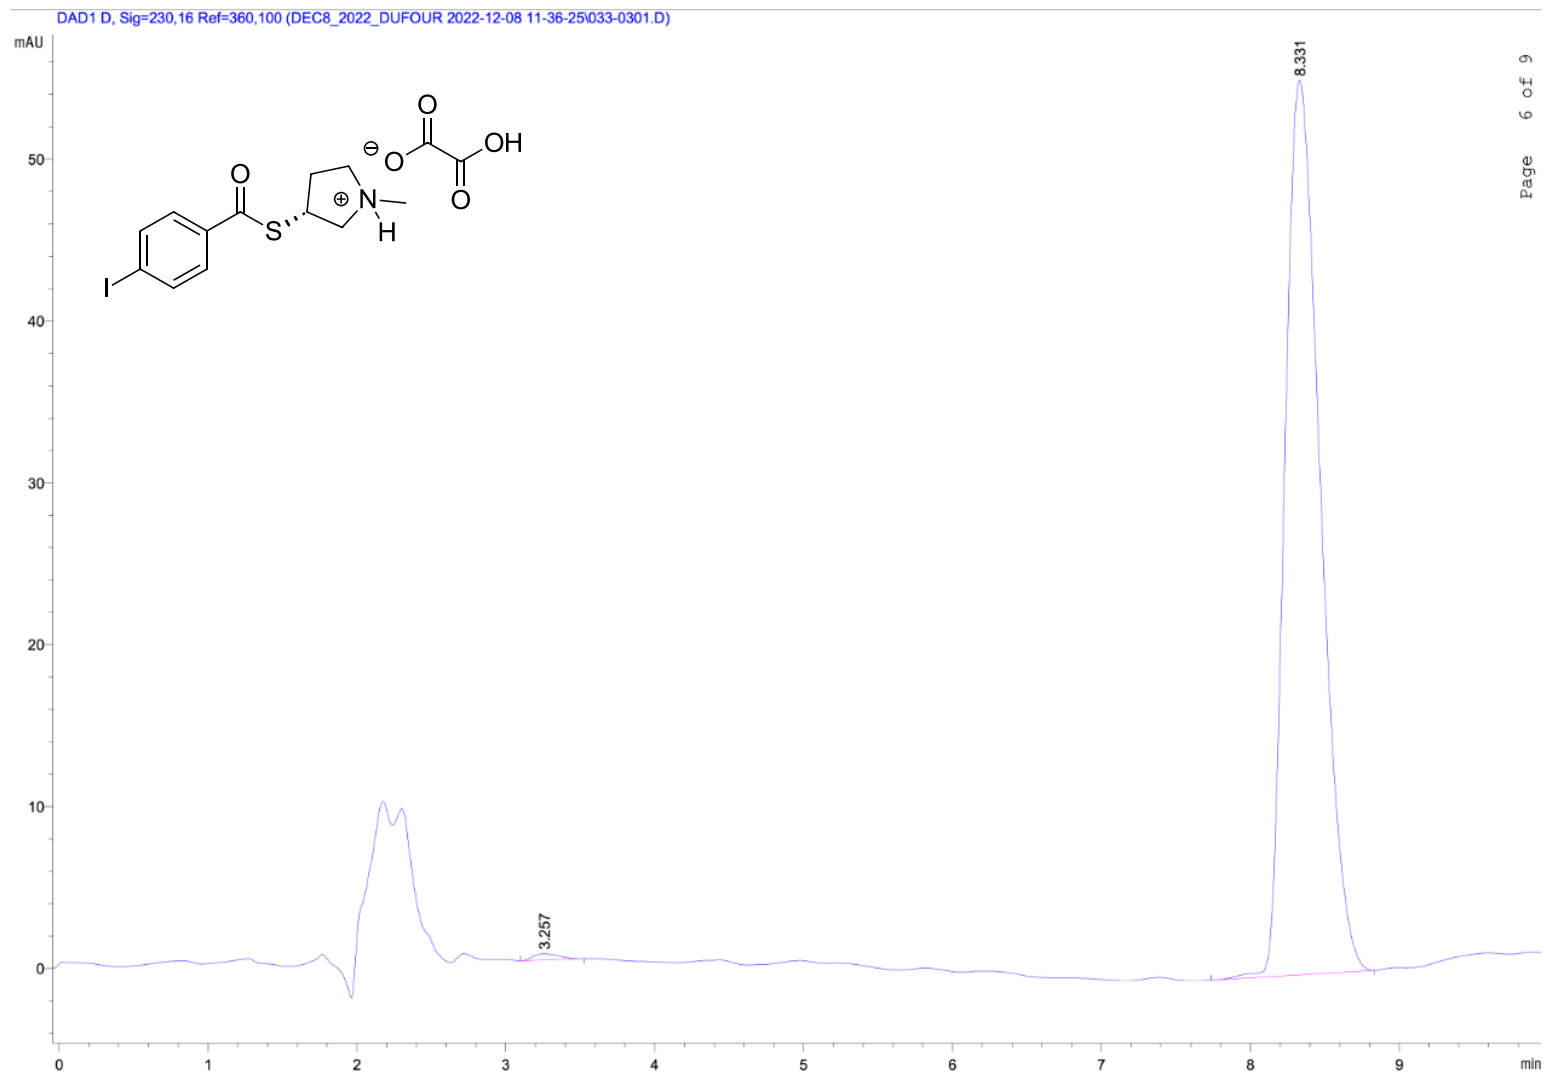

**(28) (3R)-3-(p-Iodobenzoyloxy)-1-methyl-1-pyrrolidinium chloride**

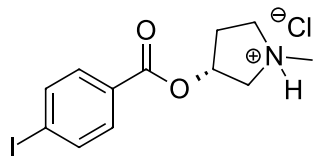

**Synthesis: (3R)-1-Methyl-3-pyrrolidinyl p-iodobenzoate:** 4-Iodobenzoyl chloride (0.799 g, 3.00 mmol), triethylamine (1.05 mL, 7.50 mmol) and 4-dimethylaminopyridine (DMAP) (0.0659 g, 0.540 mmol) were dissolved in anhydrous dichloromethane (20.0 mL) under an argon atmosphere. (R)-(-)-1-Methyl-3-pyrrolidinol (0.329 mL, 3.00 mmol) was added at 0°C. The ice bath was removed after 5 mins, and the reaction was stirred for 3hrs. The reaction was quenched with brine (20mL), extracted with DCM (3×15 mL) and the combined organic layers were dried over Na<sub>2</sub>SO<sub>3</sub>. The solvent was removed *in vacuo* to produce a pink solid. The crude mixture was purified by silica gel column chromatography (5% MeOH/DCM) to produce a pink solid, (3R)-1-methyl-3-pyrrolidinyl p-iodobenzoate (0.409 g, 41%). The analytical data was similar to previously published data.<sup>[7]</sup>

**(3R)-3-(p-Iodobenzoyloxy)-1-methyl-1-pyrrolidinium chloride:** (3R)-1-Methyl-3-pyrrolidinyl p-iodobenzoate (0.257 g, 0.776 mmol) was dissolved in anhydrous diethyl ether (16 mL) under an argon atmosphere. HCl in diethyl ether (1 N - 1.2 mL, 1.16 mmol) was added dropwise resulting in the immediate formation of a white precipitate. The reaction was stirred for an additional 60 mins at room temperature. The precipitate was collected via suction filtration, washing with Et<sub>2</sub>O (2 x 10 mL), to afford (3R)-3-(p-iodobenzoyloxy)-1-methyl-1-pyrrolidinium chloride (0.150 mg, 53 % yield) as a white solid. Spectroscopic data: MP<sub>(diethyl ether)</sub>: 243-245 °C; IR (ATR) 3012, 3003, 2922, 2894, 2574, 2474, 1714, 1585, 1269, 1102, 753; <sup>1</sup>H NMR (400 MHz, D<sub>2</sub>O) δ 7.92-7.90 (m, 2H), 7.73-7.71 (m, 2H), 5.68-5.66 (m, 1H), 3.80-3.70 (m, 3H), 3.51 (br app s, 1H), 3.04 (s, 3H), 2.70-2.60 (m, 1H), 2.44-2.38 (m, 1H); <sup>13</sup>C NMR (100.7 MHz, D<sub>2</sub>O) δ 167.7, 138.7, 131.5, 128.9, 102.3, 74.7, 61.1, 55.2, 42.0, 31.1; LRMS (ESI<sup>+</sup>): 332.0 (M<sup>+</sup>); HRMS (ESI<sup>+</sup>): calculated for C<sub>12</sub>H<sub>15</sub>INO<sub>2</sub><sup>+</sup>: 332.0142; found for C<sub>12</sub>H<sub>15</sub>INO<sub>2</sub><sup>+</sup>: 332.0133; HPLC purity at 254 nm (75% CH<sub>3</sub>CN : 10% CH<sub>3</sub>OH : 15% aqueous triethylamine [0.1% triethylamine in H<sub>2</sub>O], retention time 5.755 mins): >99%.

(28) (3R)-3-(*p*-Iodobenzoyloxy)-1-methyl-1-pyrrolidinium Chloride IR(ATR)

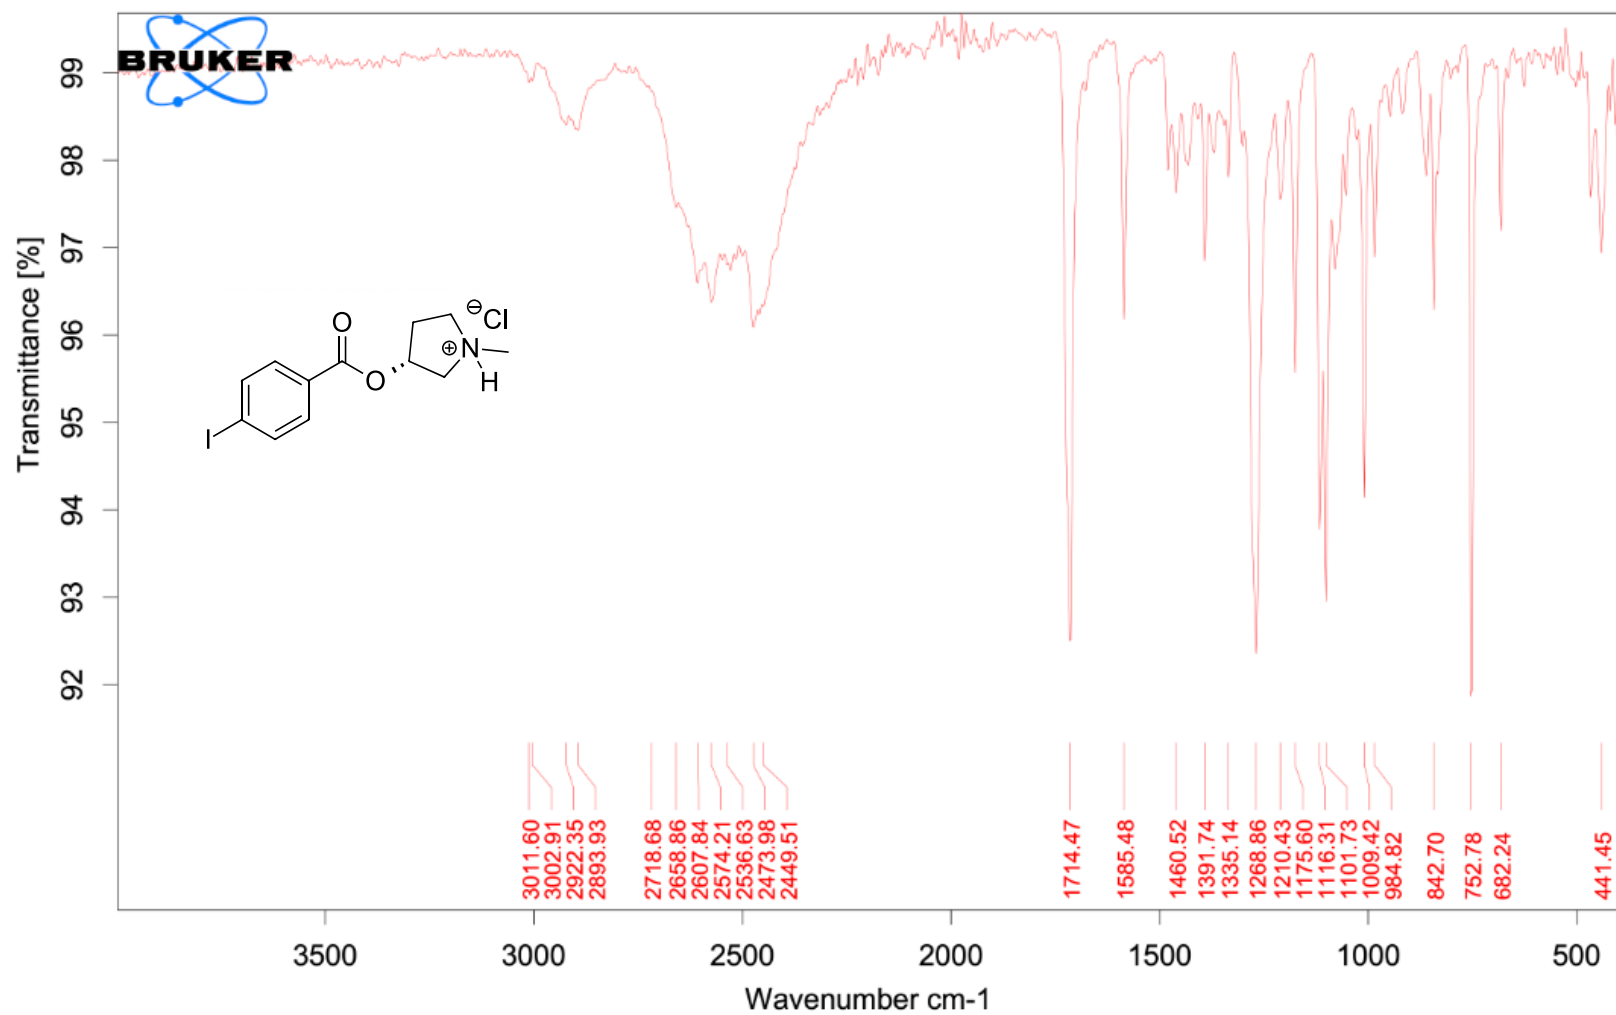

(28) (3R)-3-(p-Iodobenzoyloxy)-1-methyl-1-pyrrolidinium Chloride <sup>1</sup>H NMR 400 MHz (D<sub>2</sub>O)

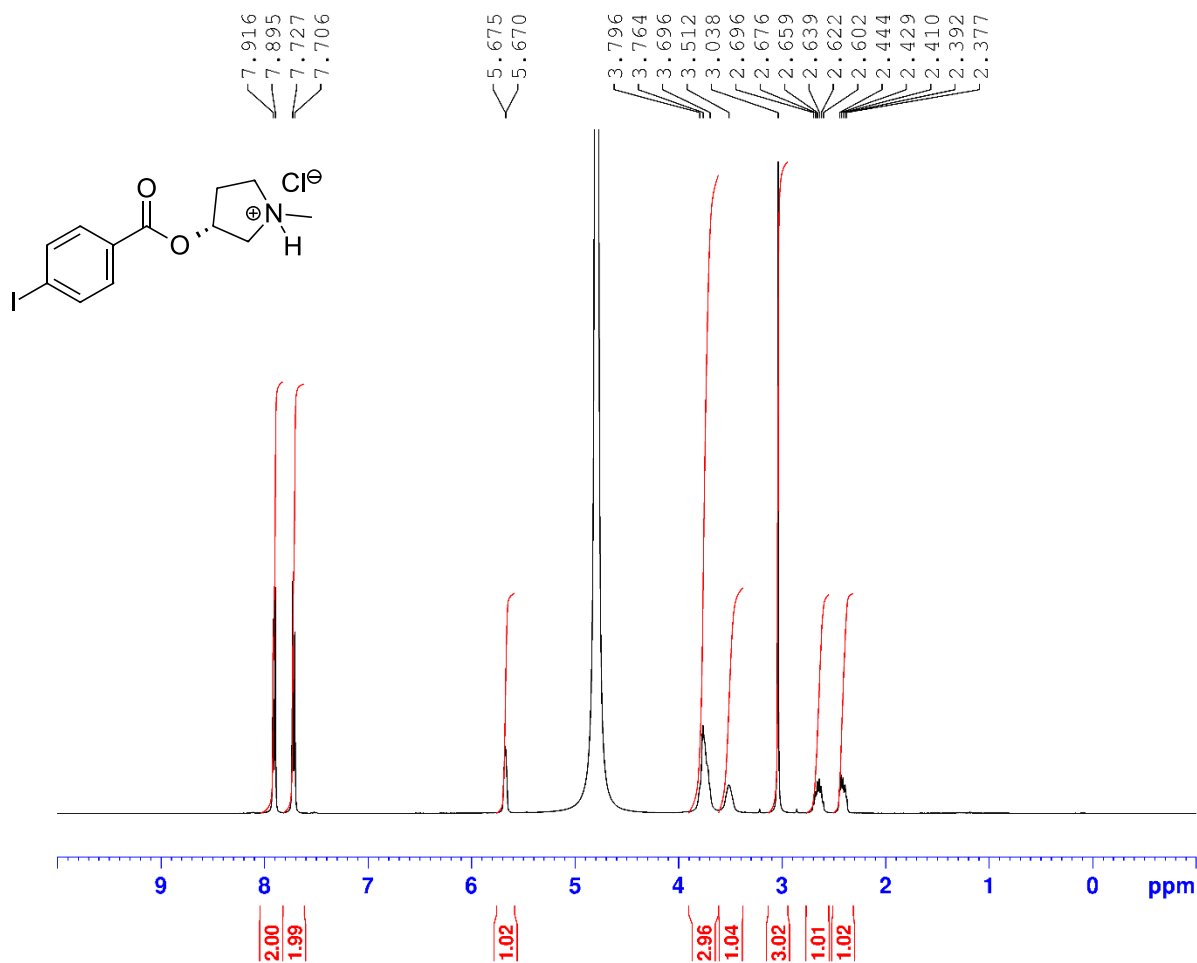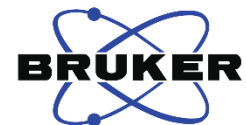

Current Data Parameters  
 NAME SB-1-103  
 EXPNO 8  
 PROCNO 1

F2 - Acquisition Parameters  
 Date\_ 20220412  
 Time 11.02 h  
 INSTRUM AVN 400  
 PROBHD Z163739\_0038 (   
 PULPROG zg30  
 TD 65536  
 SOLVENT D2O  
 NS 64  
 DS 2  
 SWH 8196.722 Hz  
 FIDRES 0.250144 Hz  
 AQ 3.9976959 sec  
 RG 66.6667  
 DW 61.000 usec  
 DE 13.54 usec  
 TE 298.0 K  
 D1 1.00000000 sec  
 TD0 1  
 SFO1 400.3024719 MHz  
 NUC1 1H  
 PO 3.33 usec  
 P1 10.00 usec  
 PLW1 14.1280026 W

F2 - Processing parameters  
 SI 65536  
 SF 400.2999650 MHz  
 WDW EM  
 SSB 0  
 LB 0.30 Hz  
 GB 0  
 PC 1.00

(28) (3*R*)-3-(*p*-Iodobenzoyloxy)-1-methyl-1-pyrrolidinium Chloride <sup>13</sup>C NMR 100 MHz (D<sub>2</sub>O)

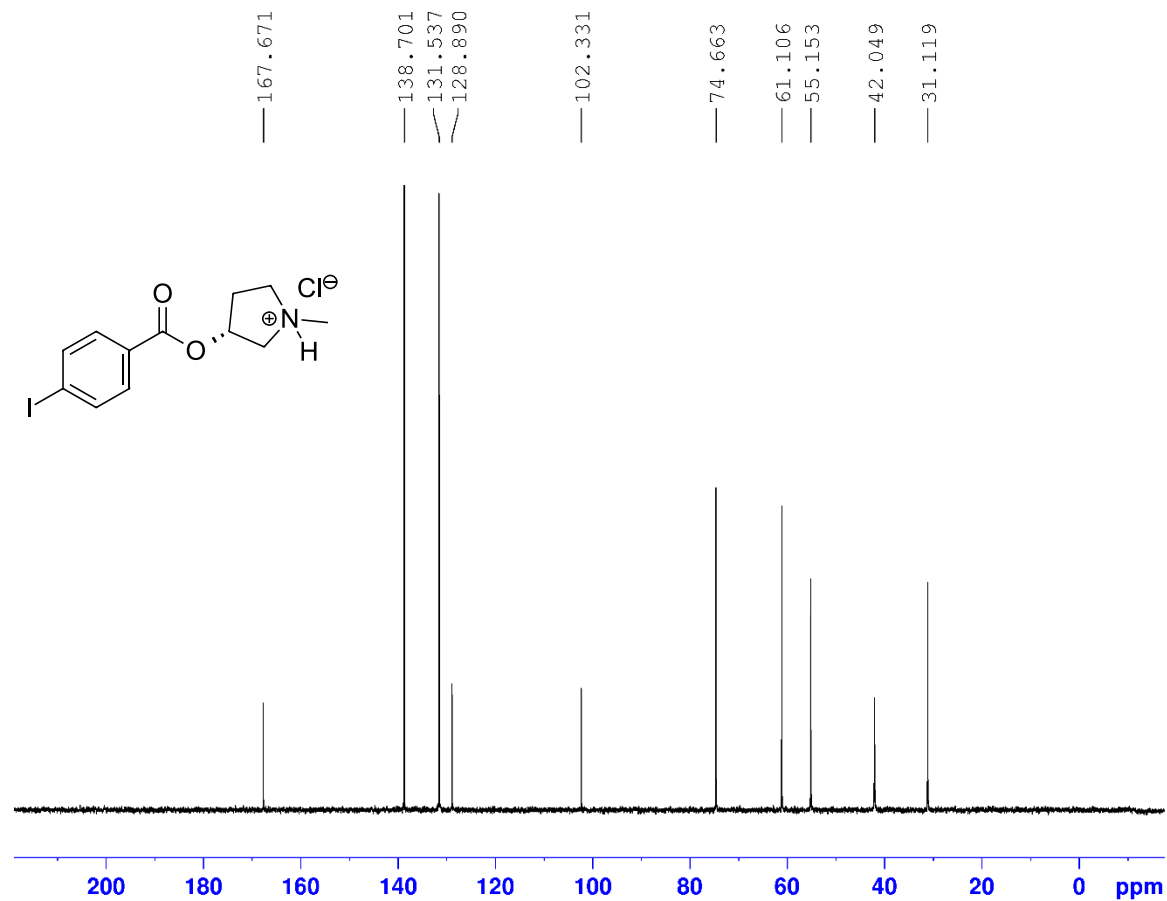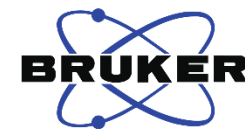

Current Data Parameters  
NAME SB-1-103  
EXPNO 9  
PROCNO 1

F2 - Acquisition Parameters  
Date\_ 20220414  
Time 23.35 h  
INSTRUM AVN 400  
PROBHD z163739\_0038 ( )  
PULPROG udeft  
TD 21424  
SOLVENT D2O  
NS 2304  
DS 8  
SWH 23809.523 Hz  
FIDRES 2.222696 Hz  
AQ 0.4499040 sec  
RG 30.6195  
DW 21.000 usec  
DE 6.50 usec  
TE 298.0 K  
D1 4.0000000 sec  
D12 0.0002000 sec  
D20 20.0000000 sec  
TD0 1  
SF01 100.6555806 MHz  
NUC1 13C  
P1 10.00 usec  
P13 2000.00 usec  
P26 500.00 usec  
PLW1 58.86999893 W  
SPNAM[5] Crp60comp.4  
SPOAL5 0.500  
SPOFFS5 0 Hz  
SPW5 8.99470043 W  
SPNAM[8] Crp60,0.5,20.1  
SPOAL8 0.500  
SPOFFS8 0 Hz  
SPW8 8.99470043 W  
SF02 400.3016012 MHz  
NUC2 1H  
CPDPRG[2] waltz65  
PCPD2 90.00 usec  
PLW2 14.12800026 W  
PLW12 0.17442000 W

F2 - Processing parameters  
S1 131072  
SF 100.6554448 MHz  
WDW EM  
SSB 0  
LB 2.00 Hz  
GB 0  
PC 1.40



(28) (3R)-3-(*p*-Iodobenzoyloxy)-1-methyl-1-pyrrolidinium Chloride High Resolution Mass Spectrum (ESI, positive mode)

### Mass Spectrum SmartFormula Report

**Analysis Info**

Analysis Name D:\Data\Xiao\July 06 2022\2000014.d  
Method Xiao all 1.m  
Sample Name TRV 6003 HCl  
Comment

Acquisition Date 7/6/2022 3:12:40 PM

Operator x  
Instrument compact 8255754.20059

**Acquisition Parameter**

|             |            |                      |          |                  |           |
|-------------|------------|----------------------|----------|------------------|-----------|
| Source Type | ESI        | Ion Polarity         | Positive | Set Nebulizer    | 0.5 Bar   |
| Focus       | Not active | Set Capillary        | 3500 V   | Set Dry Heater   | 181 °C    |
| Scan Begin  | 50 m/z     | Set End Plate Offset | -500 V   | Set Dry Gas      | 4.0 l/min |
| Scan End    | 1500 m/z   | Set Charging Voltage | 2000 V   | Set Divert Valve | Source    |
|             |            | Set Corona           | 0 nA     | Set APCI Heater  | 0 °C      |

| Meas. m/z | Ion Formula                                      | m/z      | err [ppm] |
|-----------|--------------------------------------------------|----------|-----------|
| 332.0133  | C <sub>12</sub> H <sub>15</sub> INO <sub>2</sub> | 332.0142 | 2.7       |

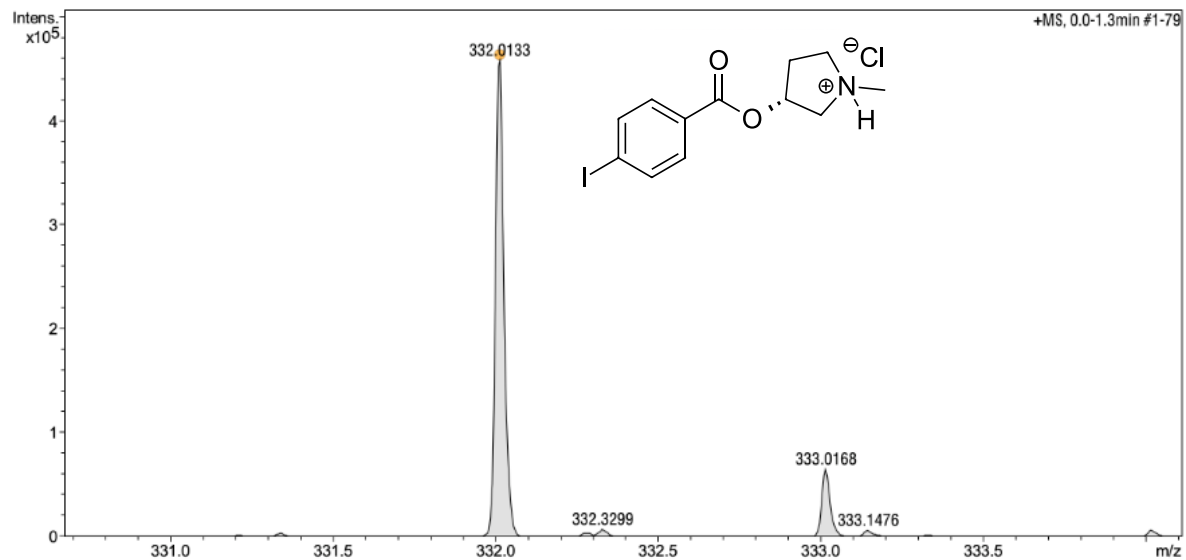

July 06 2022\2000014.d

Bruker Compass DataAnalysis 4.3

printed: 7/6/2022 3:16:03 PM

by: x

Page 1 of 1

(28) (3R)-3-(*p*-Iodobenzoyloxy)-1-methyl-1-pyrrolidinium Chloride HPLC

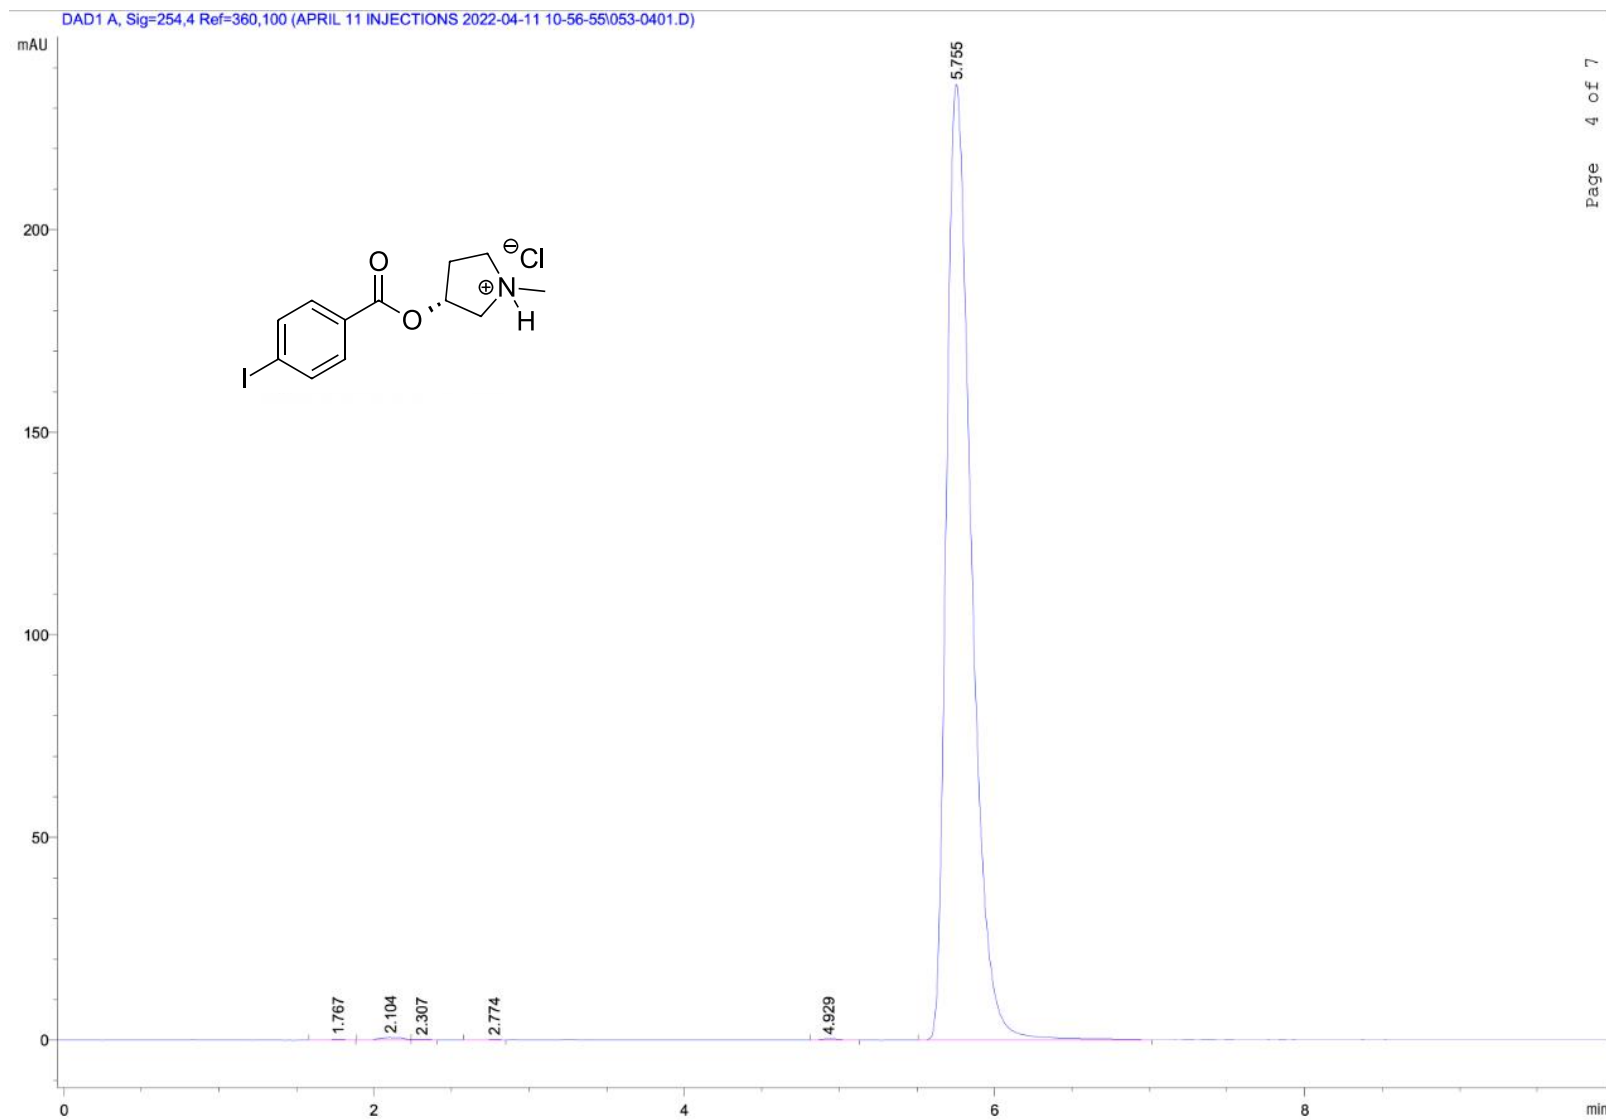

**(29) ((3*R*)-1-Methylpyrrolidin-3-yl) *p*-Fluorobenzenecarbothioate Oxylate**

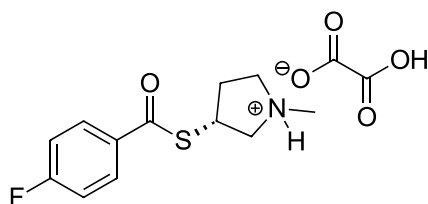

**Synthesis: (3*S*)-3-(Mesyloxy)-1-methylpyrrolidine:** (3*S*)-(-)-1-Methyl-3-pyrrolidinol (6.0 mL, 54.6 mmol) was dissolved in anhydrous dichloromethane (130 mL) and cooled to 0°C with an ice bath. Triethylamine (11.4 mL, 81.9 mmol) and methanesulfonyl chloride (4.9 mL, 62.8 mmol) were added dropwise at 0°C. The ice bath was removed after 5 mins, and the reaction was stirred overnight. Brine (50 mL) was added to the reaction and the layers were separated. The aqueous layer was extracted with dichloromethane (3 × 15 mL). The combined organic layers were dried over Na<sub>2</sub>SO<sub>3</sub>, gravity filtered, and the filtrate was concentrated *in vacuo* to produce (3*S*)-3-(mesyloxy)-1-methylpyrrolidine as a yellow oil (8.87 g, 91%). Product was confirmed by <sup>1</sup>H NMR and the crude material was immediately carried through to next step without further purification.

**(3*R*)-S-(1-Methylpyrrolidin-3-yl) ethanethioate:** (3*S*)-3-(Mesyloxy)-1-methylpyrrolidine (6.99 g, 39.0 mmol) was dissolved in anhydrous THF (130 mL) under an argon atmosphere. 18-crown-6-ether (15.5 g, 58.5 mmol) was added followed by potassium thioacetate (6.68 g, 58.5 mmol), added in 3 portions. Once all potassium thioacetate had gone into solution, the reaction was heated to 30°C and left overnight. The reaction was filtered, the filtrate diluted with water (50 mL) and extracted with EtOAc (3 × 15 mL). The combined organic layers were washed with water (3 × 20 mL) and brine (3 × 20 mL), dried over Na<sub>2</sub>SO<sub>3</sub>, gravity filtered, and concentrated *in vacuo* to produce (3*R*)-S-(1-methylpyrrolidin-3-yl) ethanethioate as a red oil. The crude material was then distilled under vacuum (1 mm Hg) at 100-101°C to give a yellow oil (4.45 g, 72%). Product was confirmed by <sup>1</sup>H NMR and the material was immediately carried through to next step without further purification.

**(S)-1-Methyl-3-pyrrolidinethiol:** (3*R*)-S-(1-Methylpyrrolidin-3-yl) ethanethioate (0.950 g, 5.97 mmol) was dissolved in MeOH (30 mL) and sodium methoxide (0.332 g, 5.97 mmol) was added to the stirring solution. After all starting material was shown to be consumed by TLC experiment

the reaction was concentrated *in vacuo*. The resulting material was placed dichloromethane (20 mL) and concentrated *in vacuo*. This process was repeated and the material was immediately used in the next step.

**((3*R*)-1-Methylpyrrolidin-3-yl) *p*-fluorobenzenecarbothioate oxylate:** The (*S*)-1-methyl-3-pyrrolidinethiol was dissolved in dichloromethane (20 mL) and cooled to 0°C using an ice bath. 4-fluorobenzoyl chloride (0.716 mL, 5.97 mmol) was added followed by triethylamine (1.66 mL, 11.9 mmol). The ice bath was removed after 30 mins and warmed to room temperature. After all starting material was shown to be consumed by TLC experiment (developed using KMnO<sub>4</sub> stain), the solvent was removed *in vacuo*. The crude material was washed with diethyl ether, filtered to remove all precipitate, and the filtrate was concentrated *in vacuo* to give an orange oil (1.52 g). A portion of this orange oil (1.03 g, 4.30 mmol) was completely dissolved in isopropanol (43 mL). With stirring, oxalic acid (0.387 g, 4.30 mmol) was added and the mixture stirred for 3 hrs. The solution was concentrated *in vacuo* to give a white solid and immediately recrystallized with isopropanol four times to give ((3*R*)-1-methylpyrrolidin-3-yl) *p*-fluorobenzenecarbothioate oxylate as a white solid (0.539 g, 38%).

*Spectroscopic Data:* MP<sub>(isopropanol)</sub>: 134–137 °C; IR(ATR): 3035, 2964, 2847, 2716, 1655, 1598, 1206, 913, 841 cm<sup>-1</sup>; <sup>1</sup>H NMR (400 MHz, DMSO-*d*<sub>6</sub>) δ 8.00-7.97 (m, 2H), 7.43-7.39 (m, 2H), 4.24 (pent, J = 7.5 Hz, 1H), 3.74 (dd, J = 12.0, 8.3 Hz, 1H), 3.39-3.34 (m, 1H), 3.30-3.23 (m, 2H), 2.79 (s, 3H), 2.60-2.53 (m, 1H), 2.08-1.99 (m, 1H); <sup>13</sup>C NMR (100.7 MHz, DMSO-*d*<sub>6</sub>) δ 189.4 (0), 165.5 (d, <sup>1</sup>J<sub>CF</sub> = 253.3 Hz, 0), 164.5 (1), 132.47 (d, <sup>4</sup>J<sub>CF</sub> = 2.6 Hz, 0), 129.9 (d, <sup>3</sup>J<sub>CF</sub> = 9.8 Hz, 1), 116.4 (d, <sup>2</sup>J<sub>CF</sub> = 22.4 Hz, 1), 59.6 (2), 54.1 (2), 40.4 (3), 38.6 (1), 30.0 (2); <sup>19</sup>F NMR (376.6 MHz, DMSO-*d*<sub>6</sub>) δ 104.1; HRMS (ESI<sup>+</sup>): calculated for C<sub>12</sub>H<sub>15</sub>FNOS<sup>+</sup>: 240.0853 amu; found for C<sub>12</sub>H<sub>15</sub>FNOS<sup>+</sup>: 240.0853 amu; HPLC purity at 254nm (75% CH<sub>3</sub>CN : 10% CH<sub>3</sub>OH : 15% aqueous triethylamine [0.1% triethylamine in H<sub>2</sub>O], retention time 5.031 mins): 98.2%.

(29) ((3*R*)-1-Methylpyrrolidin-3-yl) *p*-Fluorobenzenecarbothioate Oxylate IR(ATR)

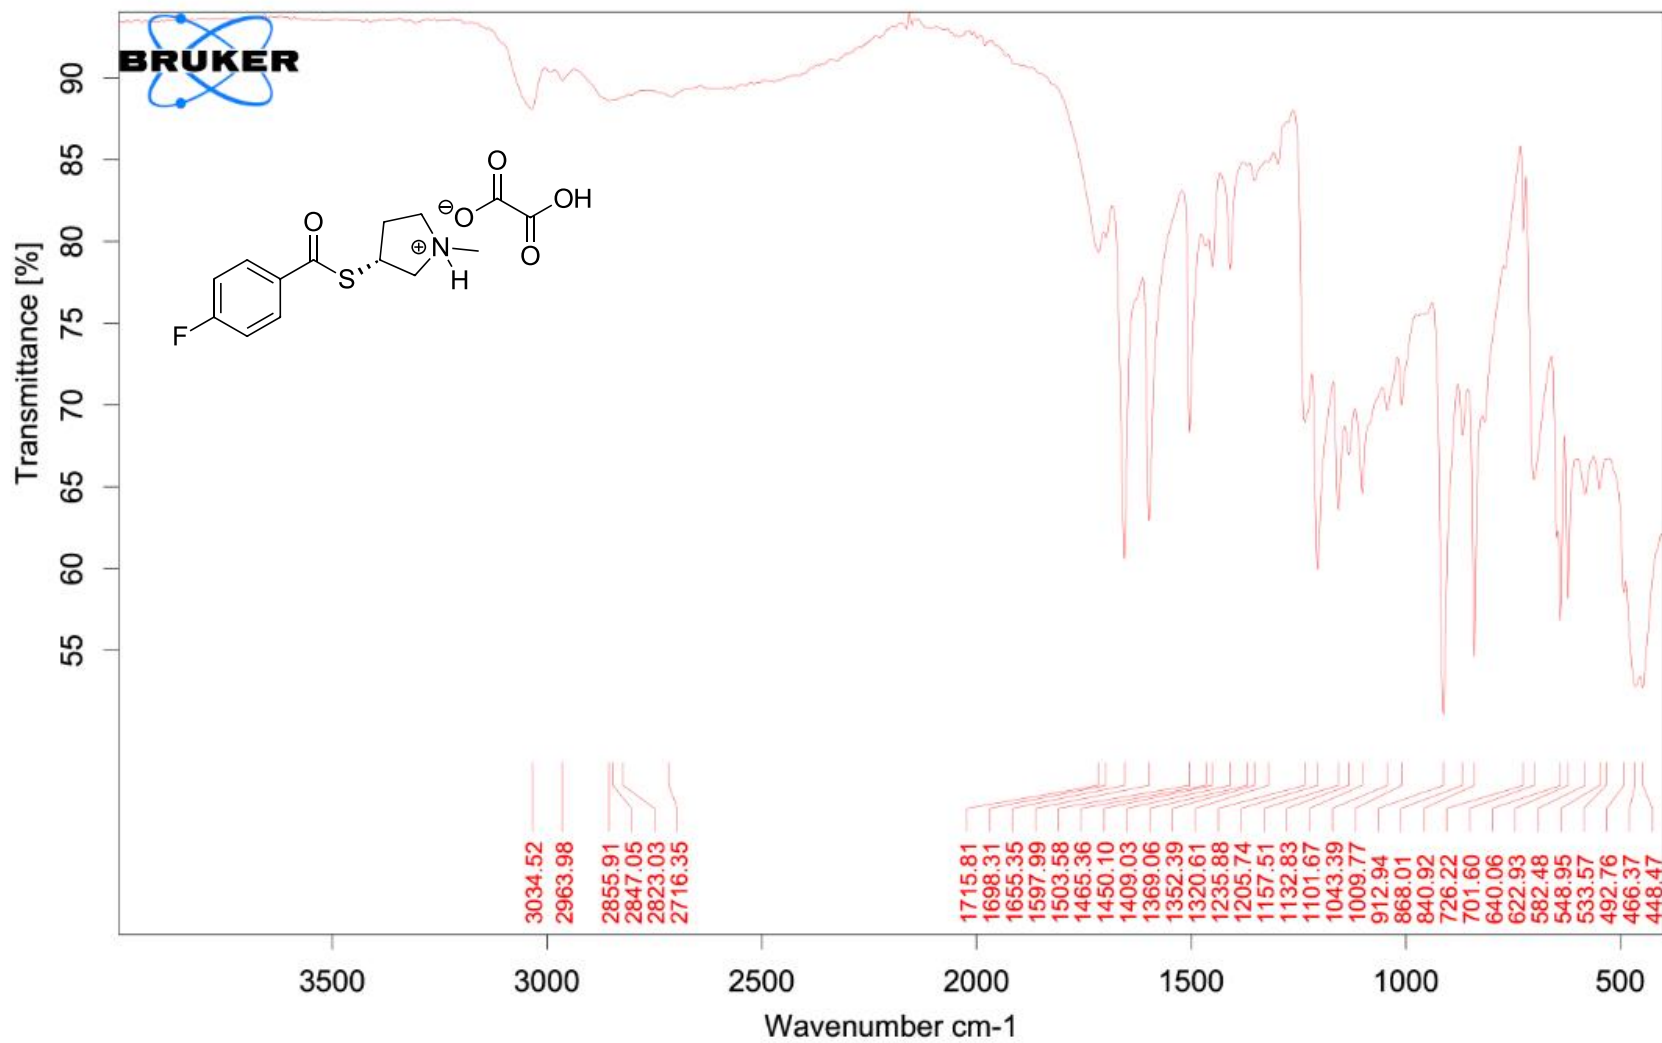

(29) ((3*R*)-1-Methylpyrrolidin-3-yl) *p*-Fluorobenzenecarbothioate Oxylate <sup>1</sup>HNMR 400 MHz (DMSO-*d*<sub>6</sub>)

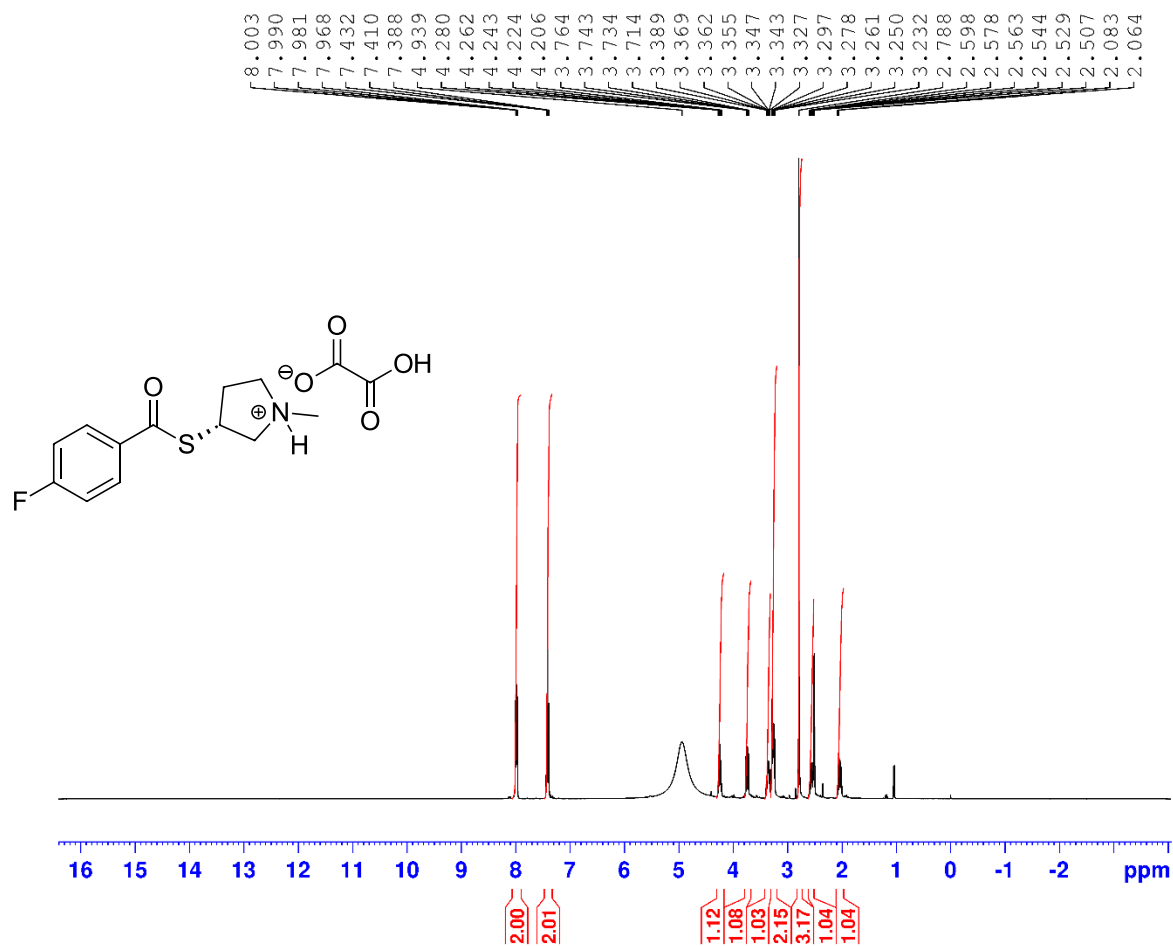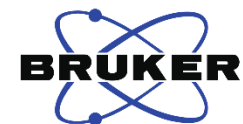

Current Data Parameters  
 NAME MD-2-161 DMSO pure  
 EXPNO 1  
 PROCNO 1

F2 - Acquisition Parameters  
 Date\_ 20221208  
 Time 13.10 h  
 INSTRUM AVN 400  
 PROBED Z163739\_0038 ( )  
 PULPROG zg30  
 TD 65536  
 SOLVENT DMSO  
 NS 16  
 DS 2  
 SWH 8196.722 Hz  
 FIDRES 0.250144 Hz  
 AQ 3.9976959 sec  
 RG 101  
 DW 61.000 usec  
 DE 13.55 usec  
 TE 298.0 K  
 D1 1.0000000 sec  
 TD0 1  
 SF01 400.3024719 MHz  
 NUC1 1H  
 PC 3.33 usec  
 P1 9.98 usec  
 PLW1 14.13000011 W

F2 - Processing parameters  
 SI 65536  
 SF 400.300000 MHz  
 WDW EM  
 SSB 0  
 LB 0.30 Hz  
 GB 0  
 PC 1.00

(29) ((3*R*)-1-Methylpyrrolidin-3-yl) *p*-Fluorobenzenecarbothioate Oxylate <sup>13</sup>CNMR 100 MHz (DMSO-*d*<sub>6</sub>)

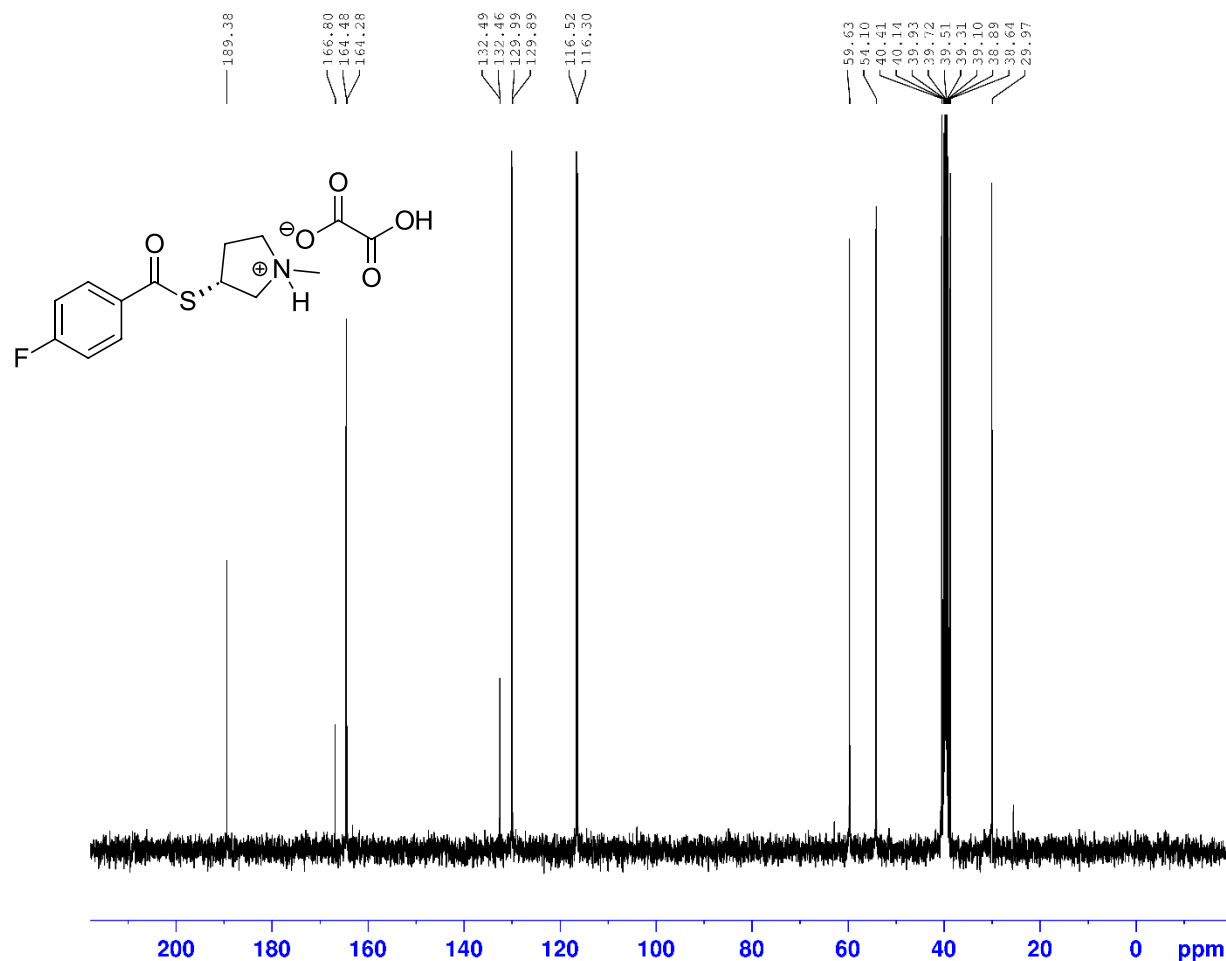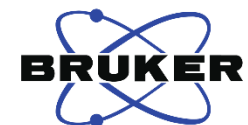

Current Data Parameters  
 NAME MD-2-161 DMSO pure  
 EXPNO 2  
 PROCNO 1

F2 - Acquisition Parameters  
 Date\_ 20221208  
 Time 13.45 h  
 INSTRUM AVN 400  
 PROBRD z163739\_0038 ( )  
 PULPROG udeflt  
 TD 21424  
 SOLVENT DMSO  
 NS 384  
 DS 8  
 SWH 23809.523 Hz  
 FIDRES 2.222696 Hz  
 AQ 0.4499040 sec  
 RG 22.2285  
 DW 21.000 usec  
 DE 6.50 usec  
 TE 298.0 K  
 D1 4.00000000 sec  
 D12 0.00002000 sec  
 D20 20.00000000 sec  
 TD0 1  
 SFO1 100.6555806 MHz  
 NUC1 13C  
 P1 10.00 usec  
 P13 2000.00 usec  
 P26 500.00 usec  
 PLW1 58.86999893 W  
 SPNAM[5] Crp60comp.4  
 SPOAL5 0.500  
 SPOFF5 0 Hz  
 SPW5 8.99470043 W  
 SPNAM[8] Crp60,0.5,20.1  
 SPOAL8 0.500  
 SPOFF8 0 Hz  
 SPW8 8.99470043 W  
 SFO2 400.3016012 MHz  
 NUC2 1H  
 CPDPRG[2] waltz65  
 PCPD2 90.00 usec  
 PLW2 14.13000011 W  
 PLW12 0.17375000 W

F2 - Processing parameters  
 SI 131072  
 SF 100.6555603 MHz  
 WDW EM  
 SSB 0  
 LB 2.00 Hz  
 GB 0  
 PC 1.40

(29) ((3R)-1-Methylpyrrolidin-3-yl) *p*-Fluorobenzenecarbothioate Oxylate

### Mass Spectrum SmartFormula Report

**Analysis Info**

Analysis Name D:\Data\Xiao\Dec 13 2022\2000001.d  
Method Xiao all 1.m  
Sample Name TRV6030 Oxalate  
Comment

Acquisition Date 2022-12-13 1:52:45 PM

Operator x  
Instrument compact 8255754.20059

**Acquisition Parameter**

|             |            |                      |          |                  |           |
|-------------|------------|----------------------|----------|------------------|-----------|
| Source Type | ESI        | Ion Polarity         | Positive | Set Nebulizer    | 0.5 Bar   |
| Focus       | Not active | Set Capillary        | 3500 V   | Set Dry Heater   | 180 °C    |
| Scan Begin  | 50 m/z     | Set End Plate Offset | -500 V   | Set Dry Gas      | 4.0 l/min |
| Scan End    | 1500 m/z   | Set Charging Voltage | 2000 V   | Set Divert Valve | Source    |
|             |            | Set Corona           | 0 nA     | Set APCI Heater  | 0 °C      |

| Meas. m/z | Ion Formula                          | m/z      | err [ppm] |
|-----------|--------------------------------------|----------|-----------|
| 240.0853  | C <sub>12</sub> H <sub>15</sub> FNOS | 240.0853 | 0.1       |

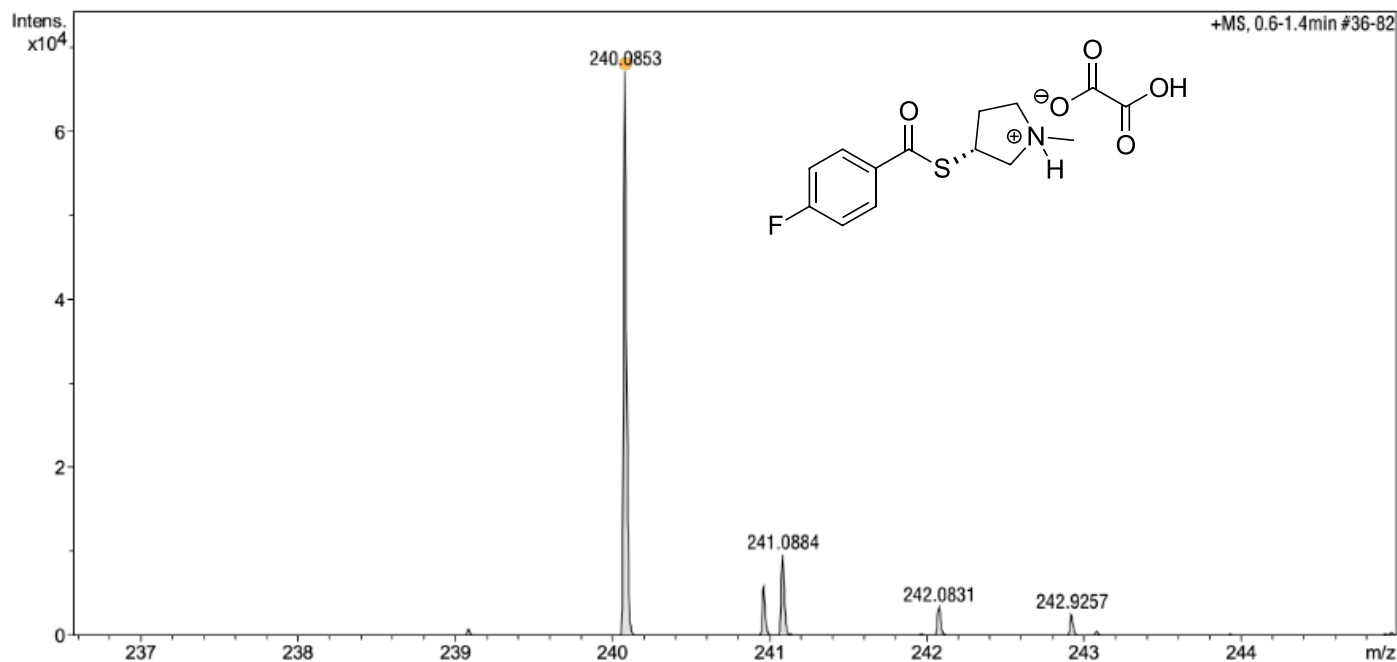



(29) ((3*R*)-1-Methylpyrrolidin-3-yl) *p*-Fluorobenzenecarbothioate Oxylate HPLC

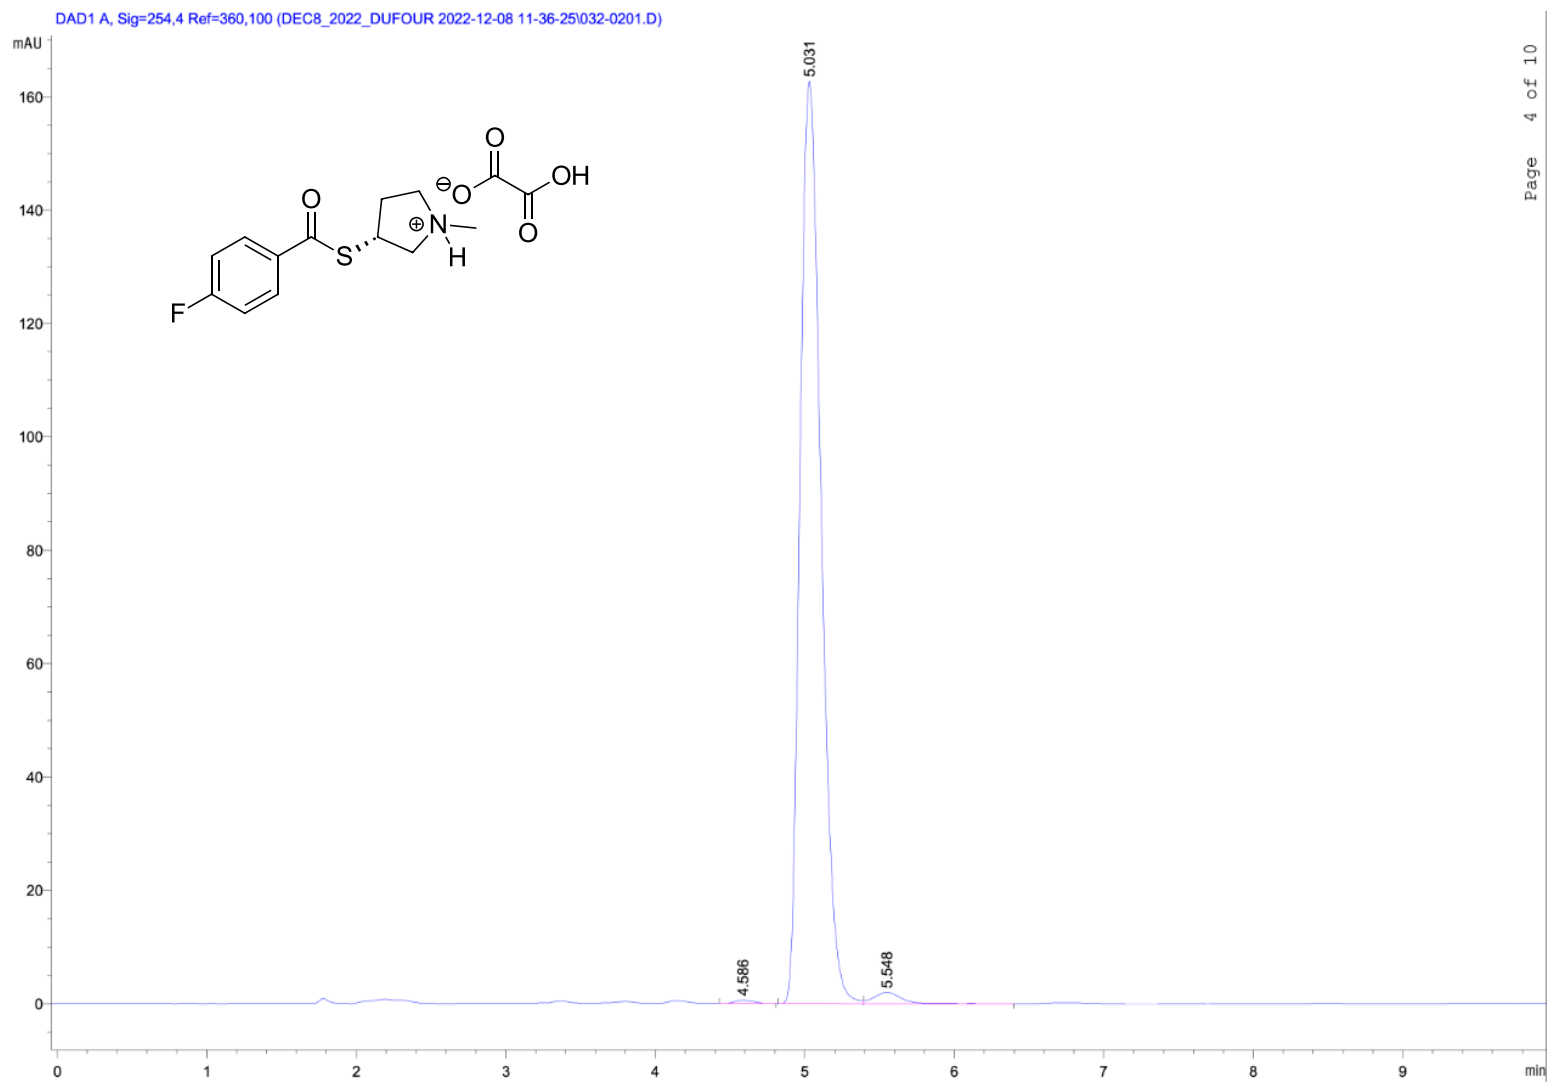

**(30) (3R)-3-(p-Fluorobenzoyloxy)-1-methyl-1-pyrrolidinium Chloride**

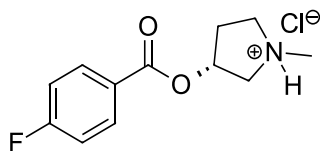

**Synthesis: (3R)-1-Methyl-3-pyrrolidinyl p-fluorobenzoate:** (3R)-(+)-1-Methyl-3-pyrrolidinol (0.659 mL, 6.00 mmol) was dissolved in anhydrous dichloromethane (20 mL) under an argon atmosphere and cooled to 0°C. To this solution, triethylamine (1.67 mL, 12.0 mmol) and 4-fluorobenzoyl chloride (0.720 g, 6.00 mmol). The ice bath was removed after 5 min, and the reaction was stirred for 24hrs. At this time water (20 mL) was added, layers were separated, and the aqueous layer was extracted with dichloromethane (3 × 15 mL). The combined organic layers were dried over Na<sub>2</sub>SO<sub>3</sub>, gravity filtered, and the filtrate was concentrated *in vacuo* to produce an orange oil. This crude material was purified by flash chromatography through silica gel (5% MeOH/DCM/1% TEA) to afford (3R)-1-methyl-3-pyrrolidinyl p-fluorobenzoate as an orange oil (1.09 g, 82%).

**(3R)-3-(p-Fluorobenzoyloxy)-1-methyl-1-pyrrolidinium Chloride:** (3R)-1-Methyl-3-pyrrolidinyl p-fluorobenzoate (0.248 g, 1.11 mmol) was dissolved in anhydrous diethyl ether (22 mL) under an argon atmosphere. HCl in diethyl ether (1 N - 1.70 mL, 1.67 mmol) was added dropwise and stirred for 3 hrs. The solvent was removed *in vacuo* resulting in a white solid. The compound was triturated three times with diethyl ether (20 mL), solvent was removed with a pipet and compound was dried to produce (3R)-3-(p-fluorobenzoyloxy)-1-methyl-1-pyrrolidinium chloride (0.148 g, 51%).

**Spectroscopic Data:** MP<sub>(diethyl ether)</sub>: 144–149 °C; IR(ATR): 3112, 3051, 2955, 2603, 2569, 2455, 1718, 1602, 1270, 1114, 853, 685 cm<sup>-1</sup>; <sup>1</sup>H NMR (400 MHz, DMSO-*d*<sub>6</sub>) δ 11.36 (br s, 1H),

8.16-8.15 (m, 2H), 7.39-7.35 (m, 2H), 5.54 (br s, 1H), 3.92-3.63 (m, 2H), 3.42 (br s, 1H), 3.14 (br s, 1H), 2.86 (s, 3H), 2.58-2.15 (m, 2H);  $^{13}\text{C}$  NMR (100.7 MHz, DMSO-*d*6)  $\delta$  165.3 (d,  $^1J_{\text{C,F}} = 251.8$  Hz, 0), 164.2 (0), 132.6 (1), 125.8 (d,  $^4J_{\text{C,F}} = 2.4$  Hz, 0), 115.8 (d,  $^2J_{\text{C,F}} = 22.2$  Hz, 1), 73.3 (1), 59.4 (2), 53.1 (2), 40.4 (3), 30.4 (2); HRMS (ESI $^+$ ): calculated for  $\text{C}_{12}\text{H}_{15}\text{FNO}_2^+$ : 224.1081 amu; found for  $\text{C}_{12}\text{H}_{15}\text{FNO}_2^+$ : 224.1086 amu; HPLC purity at 230nm (75%  $\text{CH}_3\text{CN}$  : 10%  $\text{CH}_3\text{OH}$  : 15% aqueous triethylamine [0.1% triethylamine in  $\text{H}_2\text{O}$ ], retention time 4.052 mins): 98.4%.

(30) (3*R*)-3-(*p*-Fluorobenzoyloxy)-1-methyl-1-pyrrolidinium Chloride IR(ATR)

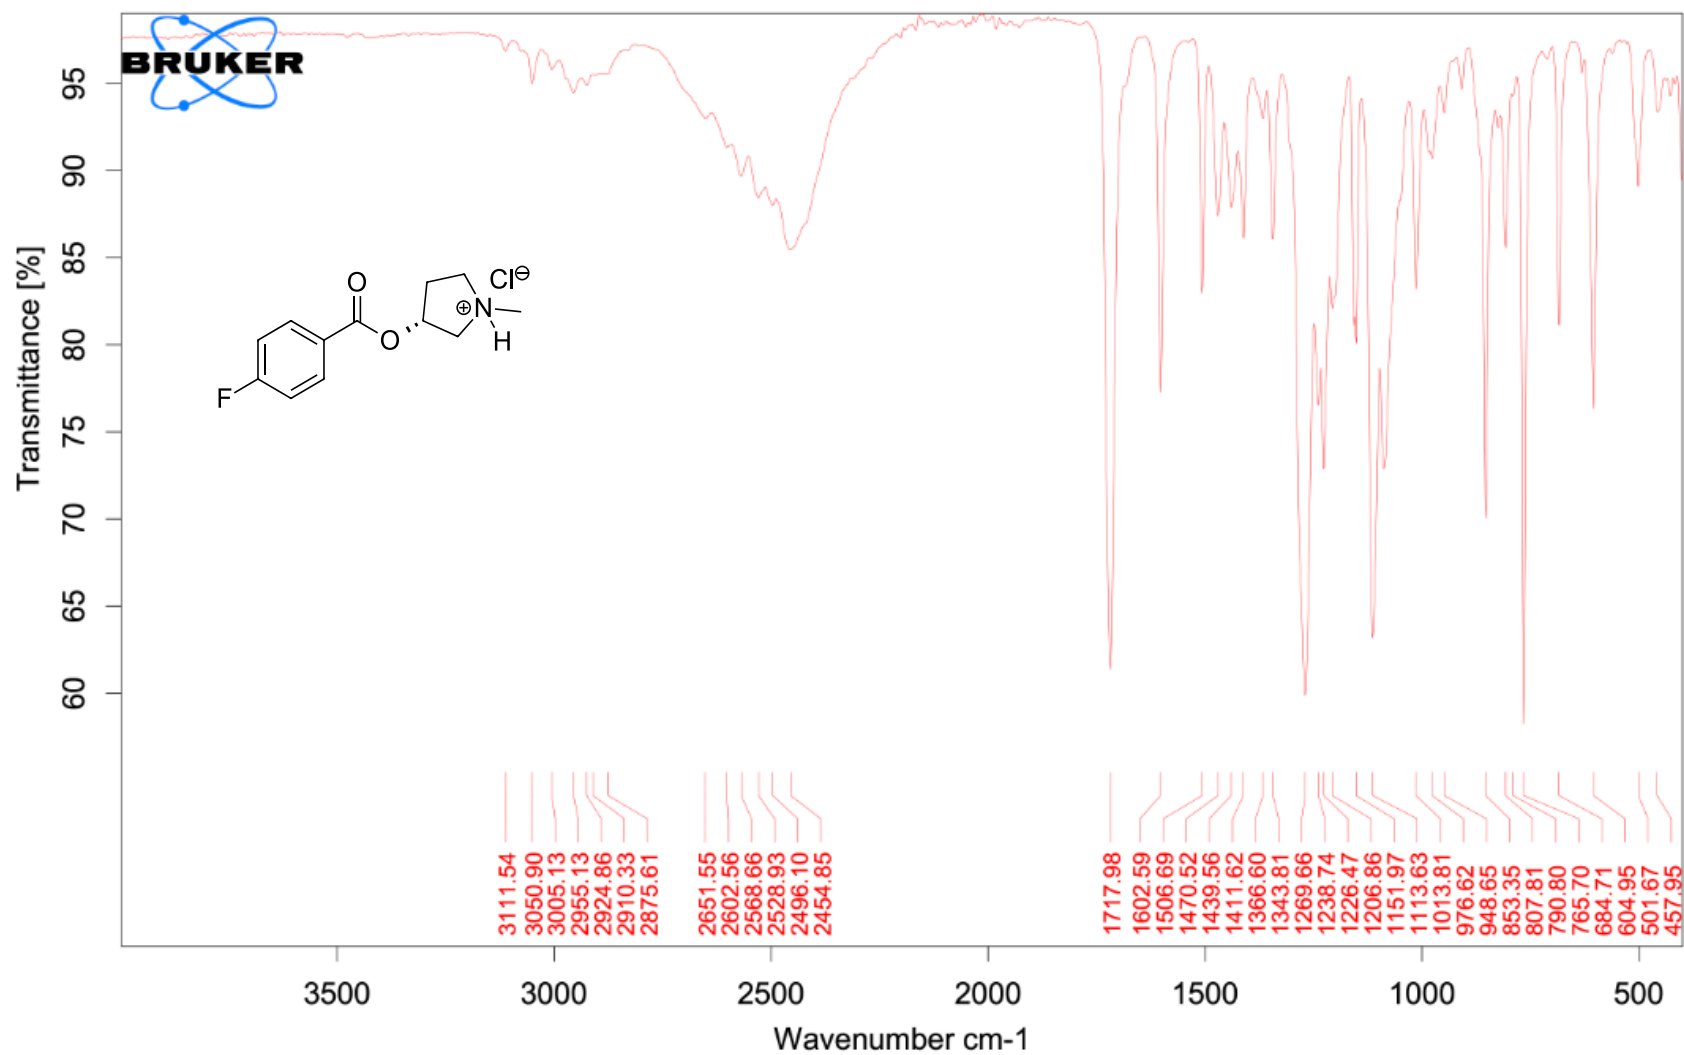

**(30)** (3*R*)-3-(*p*-Fluorobenzoyloxy)-1-methyl-1-pyrrolidinium Chloride <sup>1</sup>HNMR 400 MHz (DMSO-*d*<sub>6</sub>)

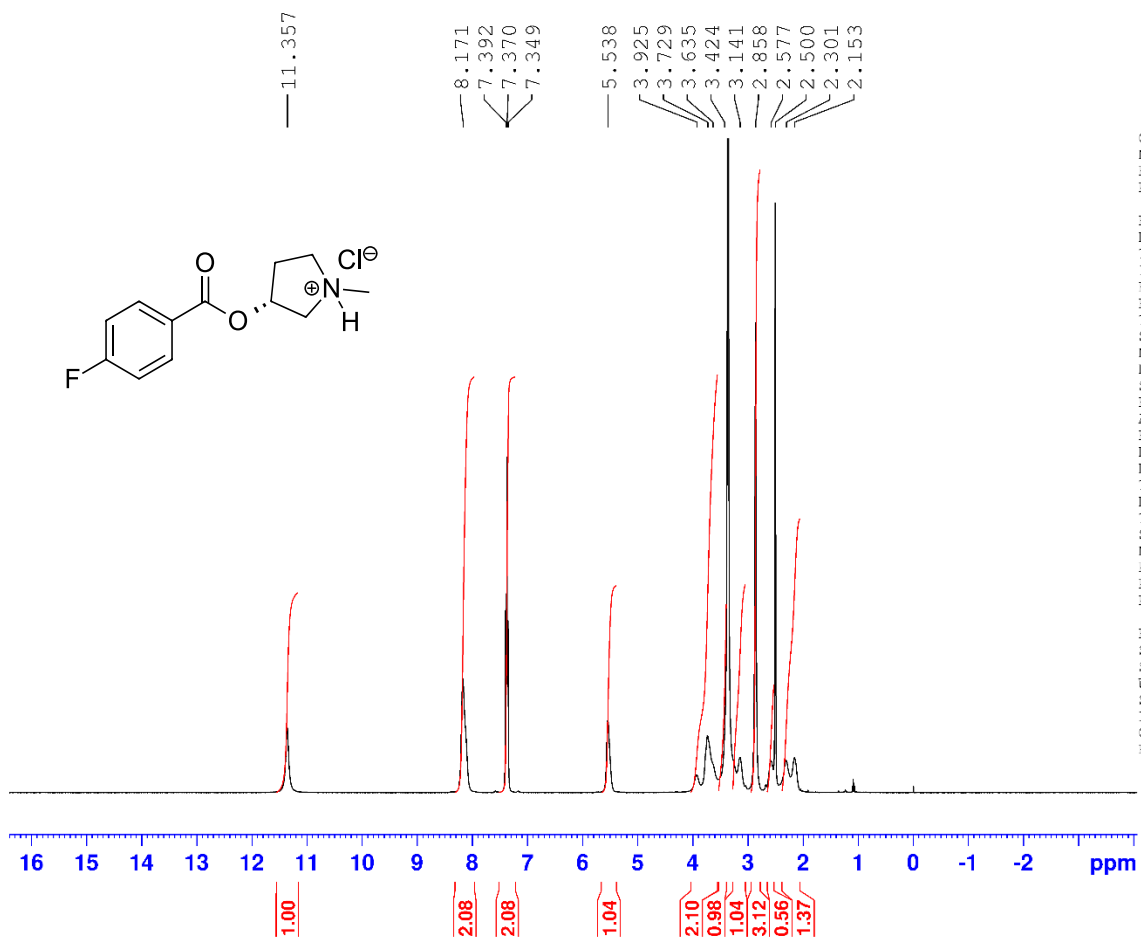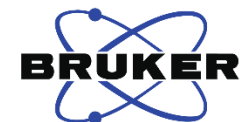

```

Current Data Parameters
NAME      MD-2-155 DMSO
EXPNO     1
PROCNO    1

F2 - Acquisition Parameters
Date_     20221129
Time      16.11 h
INSTRUM   AVN 400
PROBHD    Z163739_0038 (
PULPROG   zg30
TD         65536
SOLVENT   DMSO
NS         16
DS         2
SWH        8196.722 Hz
FIDRES     0.250144 Hz
AQ         3.9976959 sec
RG         101
DW         61.000 usec
DE         13.55 usec
TE         298.0 K
D1         1.00000000 sec
TDC        1
SFO1       400.3024719 MHz
NUC1       1H
P0         3.33 usec
P1         9.98 usec
PLWL       14.13000011 W

F2 - Processing parameters
SI         65536
SF         400.3000024 MHz
WDW        EM
SSB        0
LB         0.30 Hz
GB         0
PC         1.00
    
```

(30) (3R)-3-(*p*-Fluorobenzoyloxy)-1-methyl-1-pyrrolidinium Chloride <sup>13</sup>CNMR 100 MHz (DMSO-*d*<sub>6</sub>)

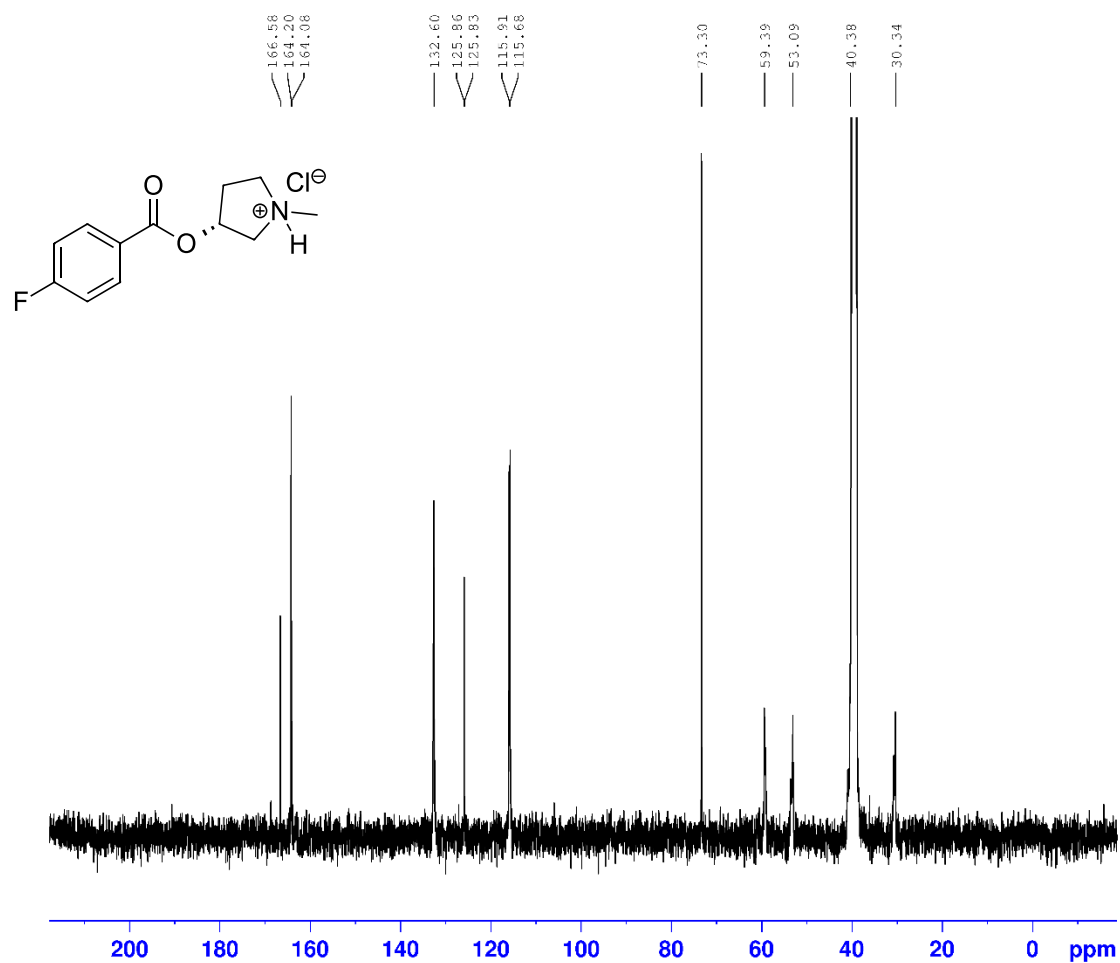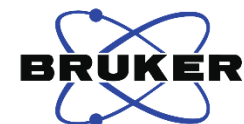

Current Data Parameters  
 NAME MD-2-155 DMSO  
 EXPNO 2  
 PROCNO 1

F2 - Acquisition Parameters  
 Date\_ 20221129  
 Time 21.50 h  
 INSTRUM AVN 400  
 PROBHD Z163739\_0038 ( )  
 PCLPROG udeflt  
 TD 21424  
 SOLVENT DMSO  
 NS 720  
 DS 8  
 SWH 23809.523 Hz  
 FIDRES 2.222696 Hz  
 AQ 0.4439040 sec  
 RG 21.7834  
 DW 21.000 usec  
 DE 6.50 usec  
 TE 298.0 K  
 D1 4.0000000 sec  
 D12 0.0000000 sec  
 D20 20.0000000 sec  
 TD0 1  
 SFO1 100.655806 MHz  
 NUC1 13C  
 P1 10.00 usec  
 P13 2000.00 usec  
 P26 500.00 usec  
 PLW1 58.86999893 W  
 SPMAM[5] Crp60comp.4  
 SFOALS 0.500  
 SPOFFS5 0 Hz  
 SPW5 8.99470043 W  
 SPMAM[8] Crp60.0.5,20.1  
 SFOALS 0.500  
 SPOFFS8 0 Hz  
 SPW8 8.99470043 W  
 SFO2 400.3016012 MHz  
 NUC2 1H  
 CPDPRG[2] waltz65  
 ECPD2 90.00 usec  
 PLW2 14.1300011 W  
 PLW12 0.17375000 W

F2 - Processing parameters  
 SI 131072  
 SF 100.6555626 MHz  
 NDW EM  
 SSB 0  
 LB 2.00 Hz  
 GR 0  
 PC 1.40

(30) (3R)-3-(p-Fluorobenzoyloxy)-1-methyl-1-pyrrolidinium Chloride High Resolution Mass Spectrum (ESI, positive mode)

### Mass Spectrum SmartFormula Report

**Analysis Info**

Analysis Name D:\Data\Xiao\Dec 13 2022\000003.d  
Method Xiao all 1.m  
Sample Name TRV6028 HCl  
Comment

Acquisition Date 2022-12-13 2:10:47 PM

Operator x  
Instrument compact 8255754.20059

**Acquisition Parameter**

|             |            |                      |          |                  |           |
|-------------|------------|----------------------|----------|------------------|-----------|
| Source Type | ESI        | Ion Polarity         | Positive | Set Nebulizer    | 0.5 Bar   |
| Focus       | Not active | Set Capillary        | 3500 V   | Set Dry Heater   | 180 °C    |
| Scan Begin  | 50 m/z     | Set End Plate Offset | -500 V   | Set Dry Gas      | 4.0 l/min |
| Scan End    | 1500 m/z   | Set Charging Voltage | 2000 V   | Set Divert Valve | Source    |
|             |            | Set Corona           | 0 nA     | Set APCI Heater  | 0 °C      |

| Meas. m/z | Ion Formula                                      | m/z      | err [ppm] |
|-----------|--------------------------------------------------|----------|-----------|
| 224.1086  | C <sub>12</sub> H <sub>15</sub> FNO <sub>2</sub> | 224.1081 | -2.1      |

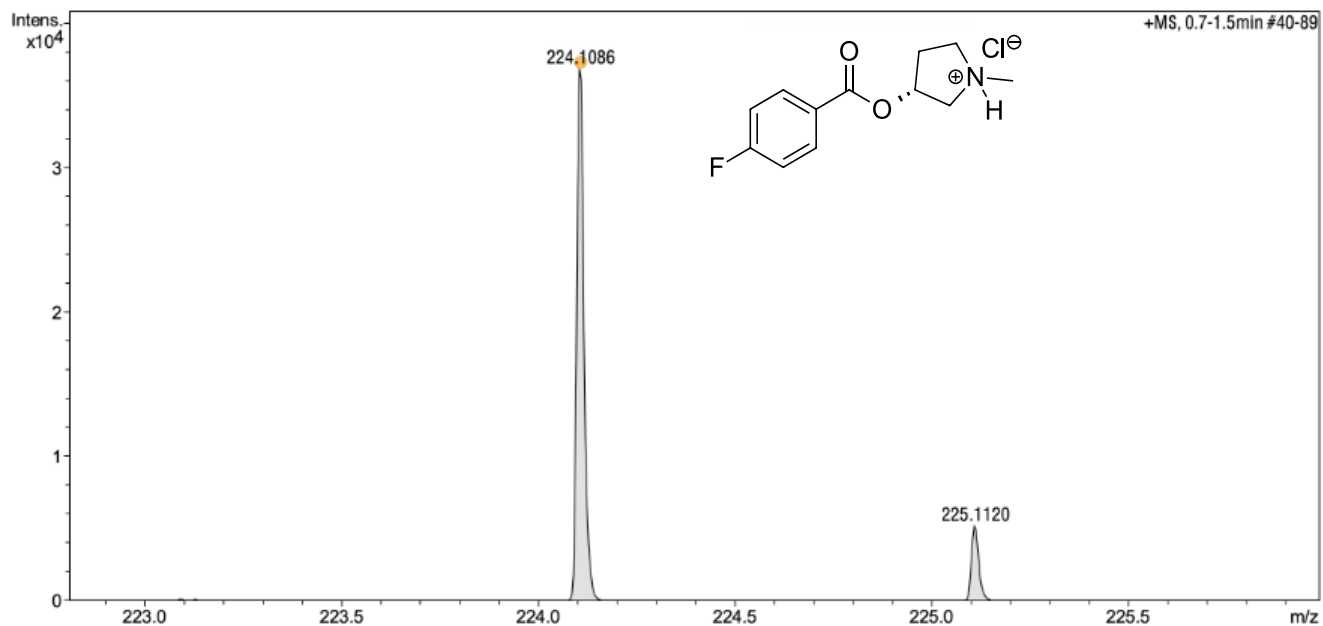

**(30)** (3*R*)-3-(*p*-Fluorobenzoyloxy)-1-methyl-1-pyrrolidinium Chloride HPLC

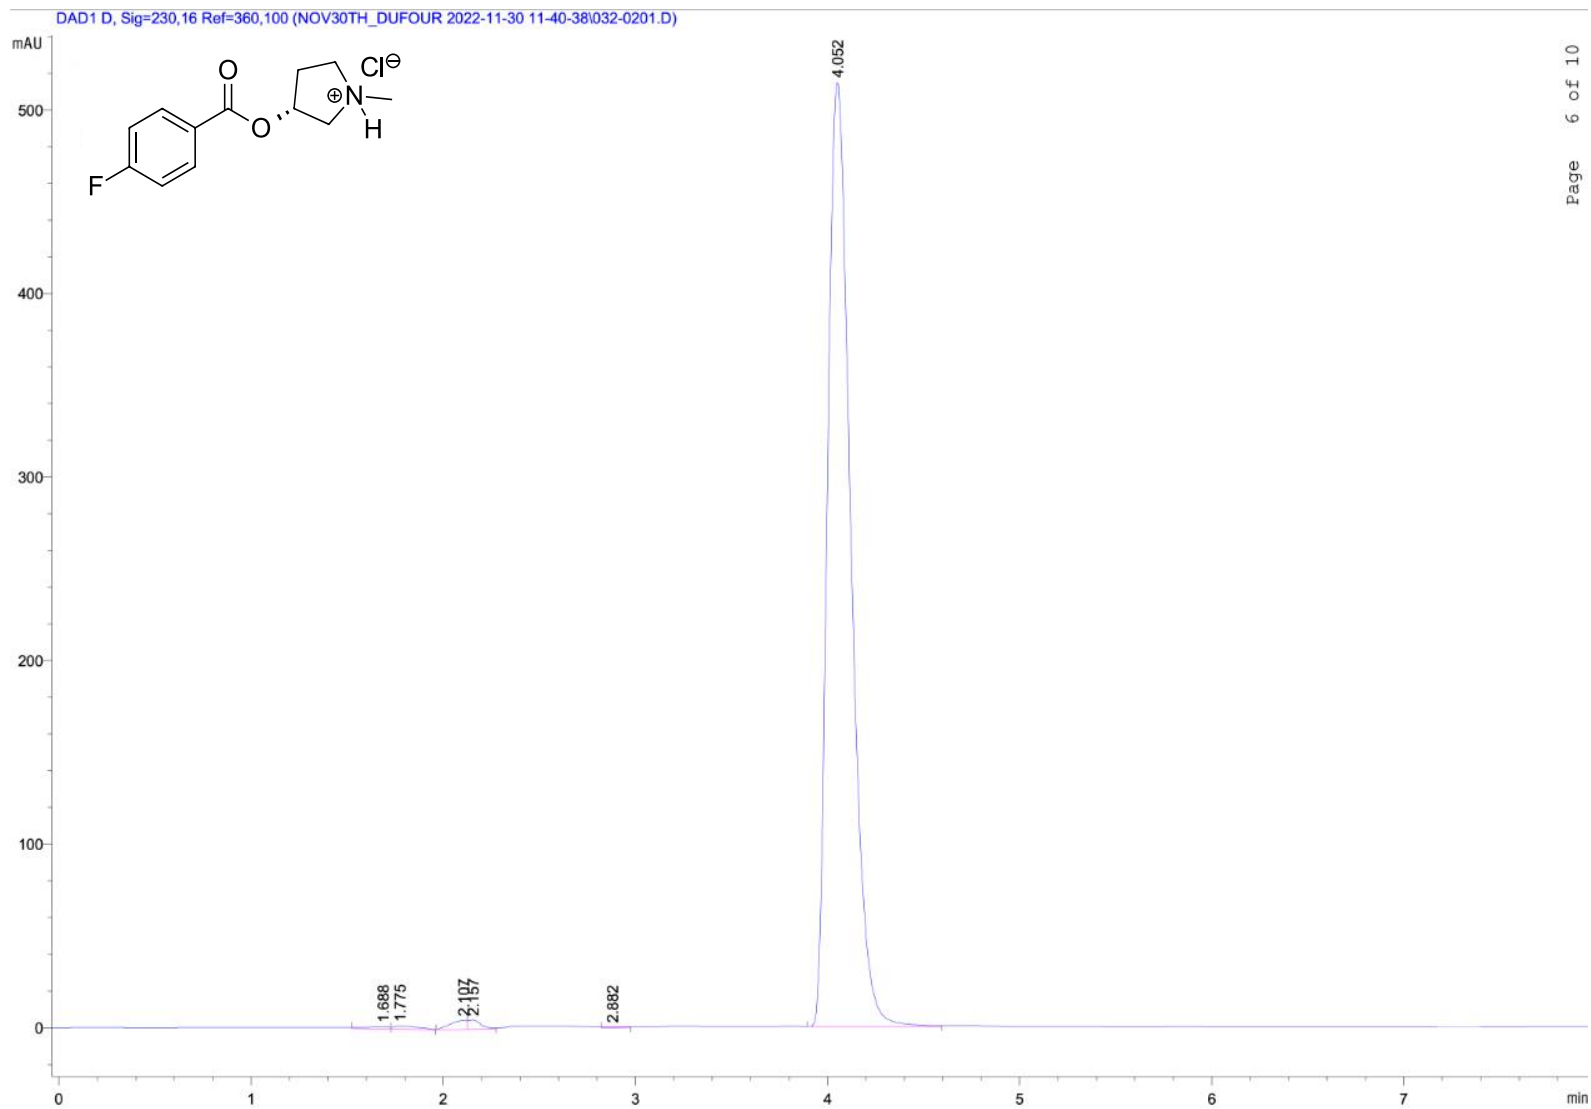



*References:*

- [1] Macdonald IR, Jollymore CT, Reid GA, Pottie IR, Martin E, Darvesh S. Thioesters for the in vitro evaluation of agents to image brain cholinesterases. *J Enzyme Inhib Med Chem*. 2013;28(3):447-455. DOI: [10.3109/14756366.2011.647008](https://doi.org/10.3109/14756366.2011.647008)
- [2] Bormans G, Sherman P, Snyder SE, Kilbourn MR. Synthesis of carbon-11- and fluorine-18-labeled 1-methyl-4-piperidyl-4'-fluorobenzoate and their biodistribution in mice. *Nucl Med Biol*. 1996;28(4):513-517. DOI [10.1016/0969-8051\(96\)00033-9](https://doi.org/10.1016/0969-8051(96)00033-9).
- [3] Hoeltje HD, Jensen B, Lambrecht G. Cyclic acetyl choline analogs part 4 4 acetoxy piperidines and 4 acetoxythia cyclo hexanes. *Eur J Med Chem*. 1978;13(5):453-464.
- [4] Kikuchi T, Fukushi K, Ikota N, Ueda T, Nagatsuka S-I, Arano Y, Irie T. Synthesis of piperidinyl and pyrrolidinyl butyrates for potential in vivo measurement of cerebral butyrylcholinesterase activity. *J Labelled Compd Radiopharm*. 2001;44(1):31-41. DOI: [10.1002/jlcr.429](https://doi.org/10.1002/jlcr.429).
- [5] Cheng CY, Brochmann-Hanssen E, Waters JA. Quantitative structure-activity relationships of aromatic esters of 1-methyl-4-piperidinol as analgesic. *J Med Chem*. 1982;25(2):145-152. DOI: [10.1021/jm00344a011](https://doi.org/10.1021/jm00344a011).
- [6] Waters JA. Aromatic esters of nonquaternary carbon-4 piperidinols as analgesics. *J Med Chem*. 1978;21(7):628-633. DOI: [10.1021/jm00205a007](https://doi.org/10.1021/jm00205a007).
- [7] Macdonald IR, Reid GA, Joy EE, Pottie IR, Matte G, Burrell S, Mawko G, Martin E, Darvesh S. Synthesis and preliminary evaluation of piperidinyl and pyrrolidinyl iodobenzoates as imaging agents for butyrylcholinesterase. *Mol Imaging Biol*. 2011;13(6):1250-1261. DOI: [10.1007/s11307-010-0448-0](https://doi.org/10.1007/s11307-010-0448-0).

## **B. Figures for histochemistry**

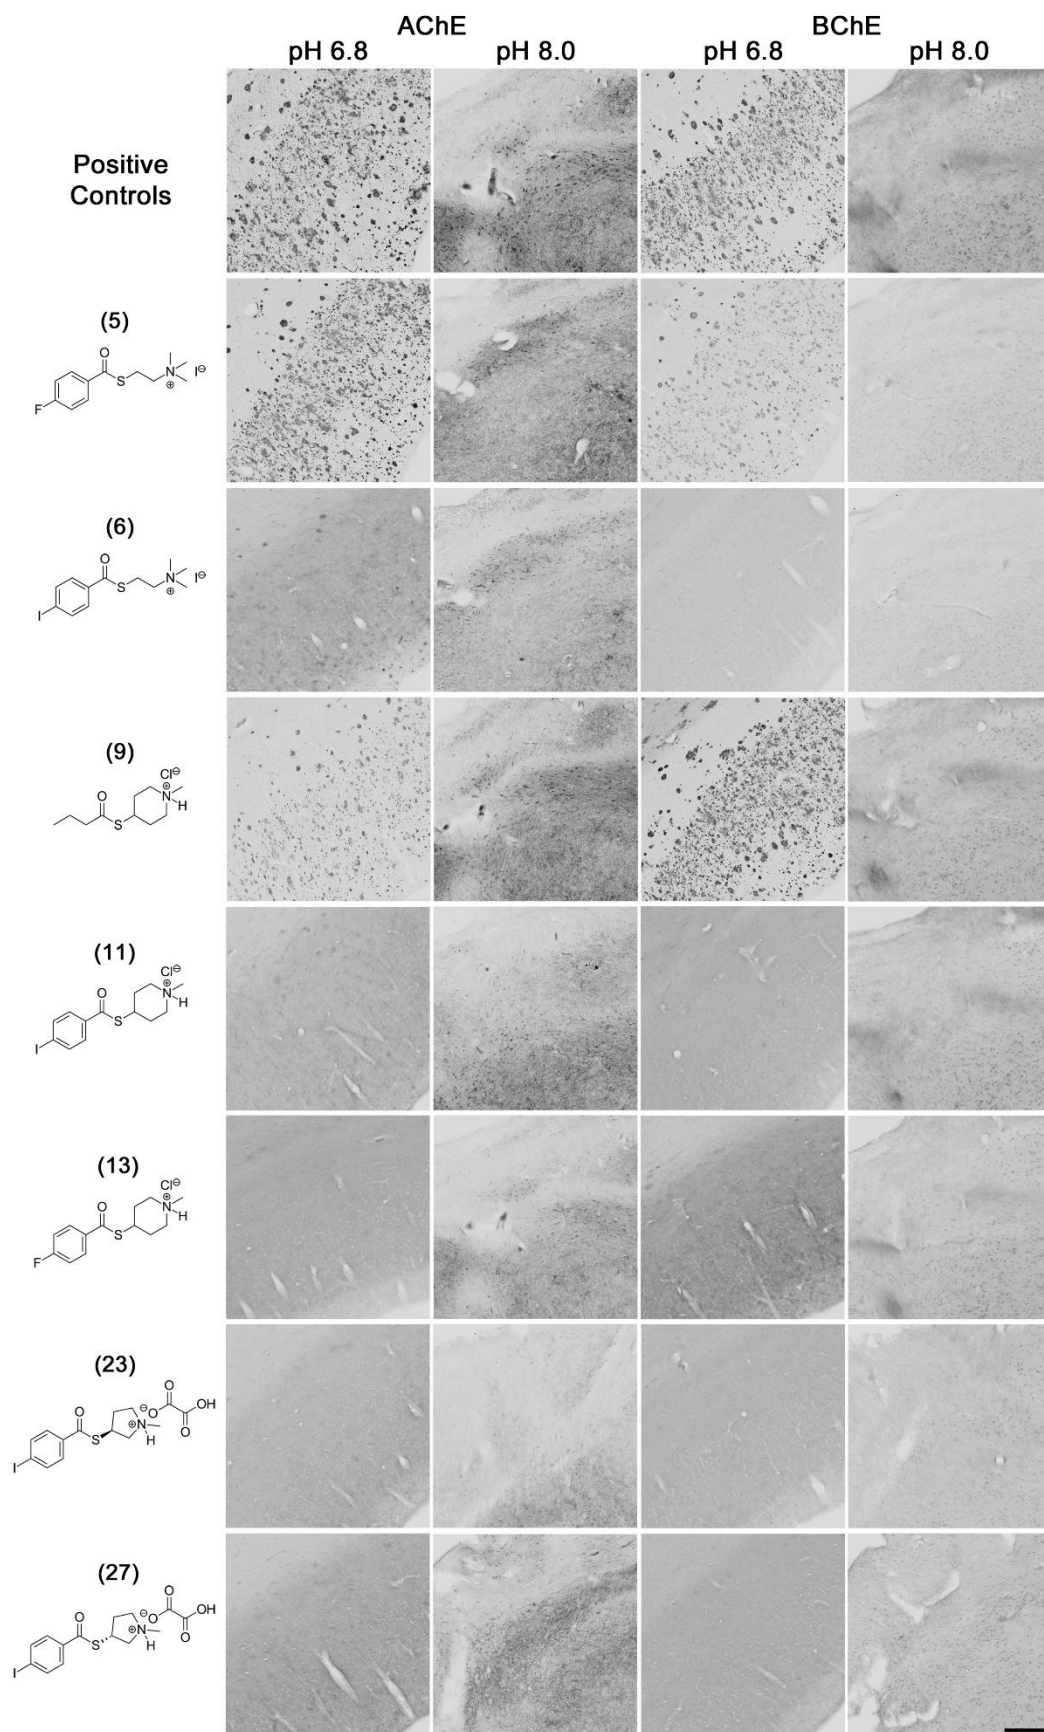

**Figure S1.** Representative photomicrographs of histochemical staining of AChE (columns 1 and 2) and BChE (columns 3 and 4) at pH 6.8 and 8.0 in human brain tissues demonstrating that, when used as inhibitors, some compounds engaged with cholinesterases. Optimal staining for plaques at pH 6.8 is shown in the orbitofrontal cortex, optimal staining of normal neural elements at pH 8.0 is shown in the thalamus. Scale bar =400  $\mu$ m.

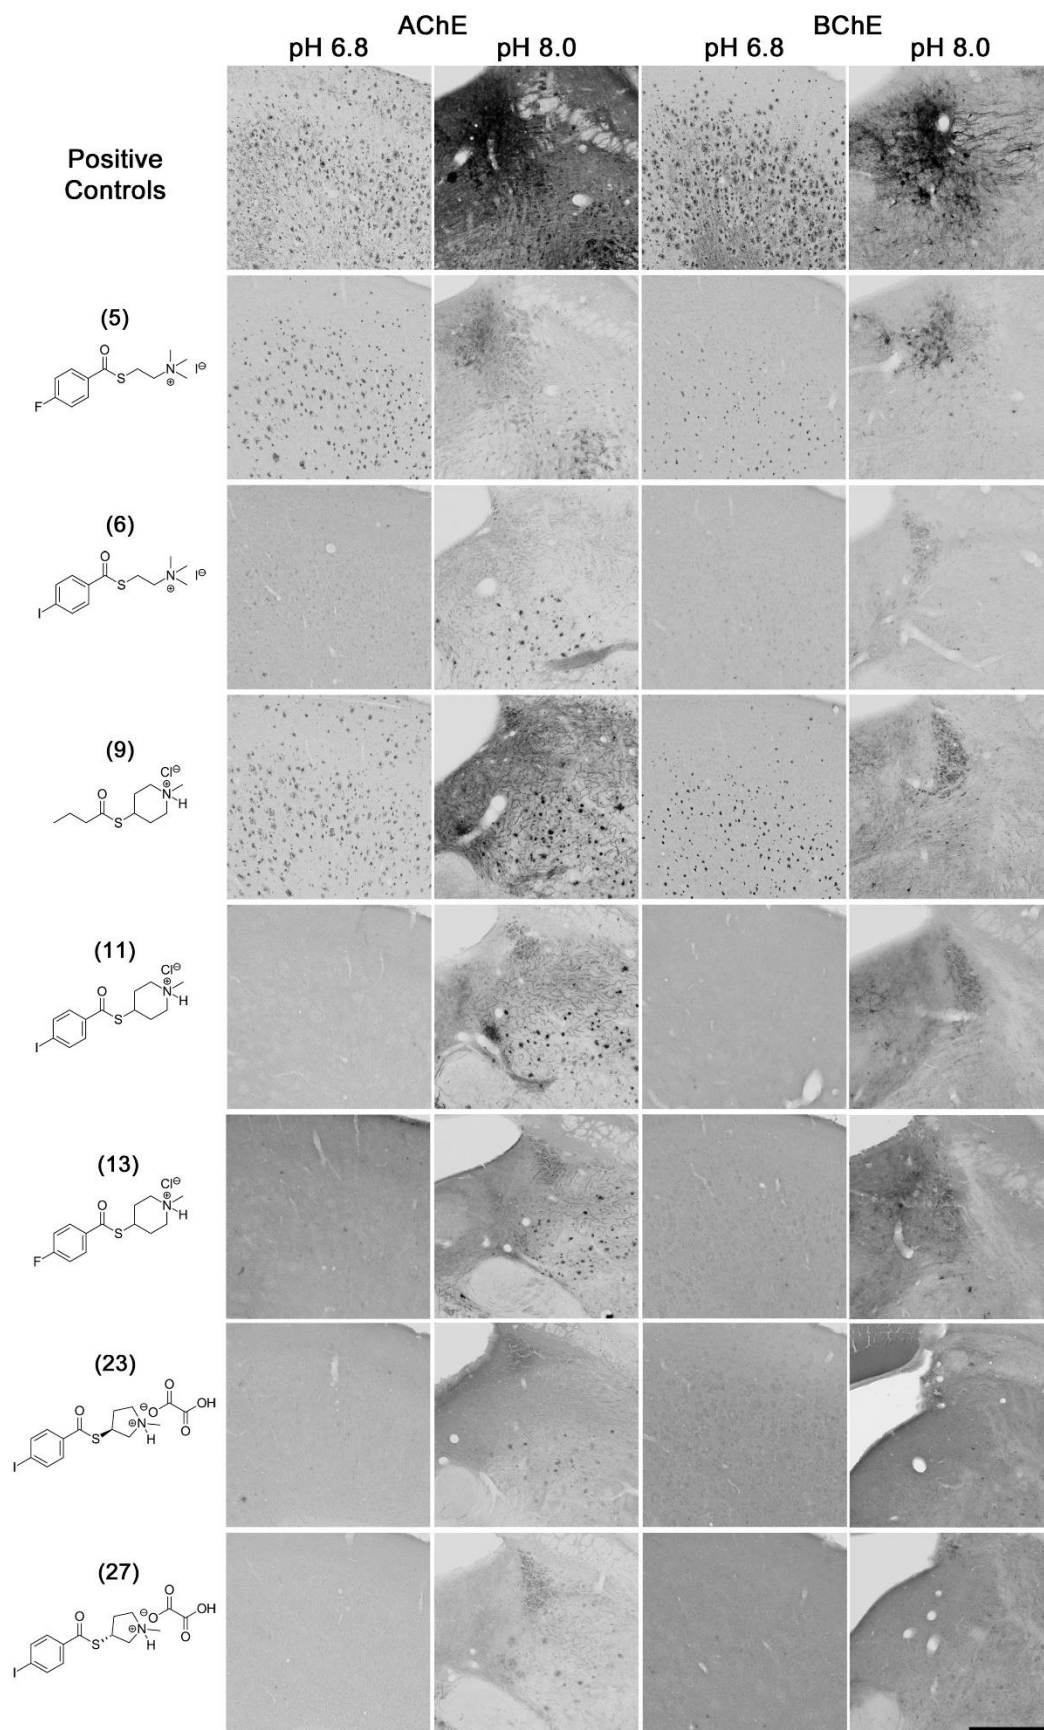

**Figure S2.** Representative photomicrographs of histochemical staining of AChE (columns 1 and 2) and BChE (columns 3 and 4) at pH 6.8 and 8.0 in mouse brain tissues demonstrating that, when used as inhibitors, some compounds engaged with cholinesterases. Optimal staining for plaques at pH 6.8 is shown in the orbitofrontal cortex, optimal staining of normal neural elements at pH 8.0 is shown in the thalamus. Scale bar = 200  $\mu$ m.
